# Supplementary material
Source: publisher site journal article supplement (https://www.dovepress.com/article/487782)
Supplement: Supplementary file 1 [file get_supplementary_file.php]

**Supplementary Files**

# Supplementary Figures

## Figure S1

| 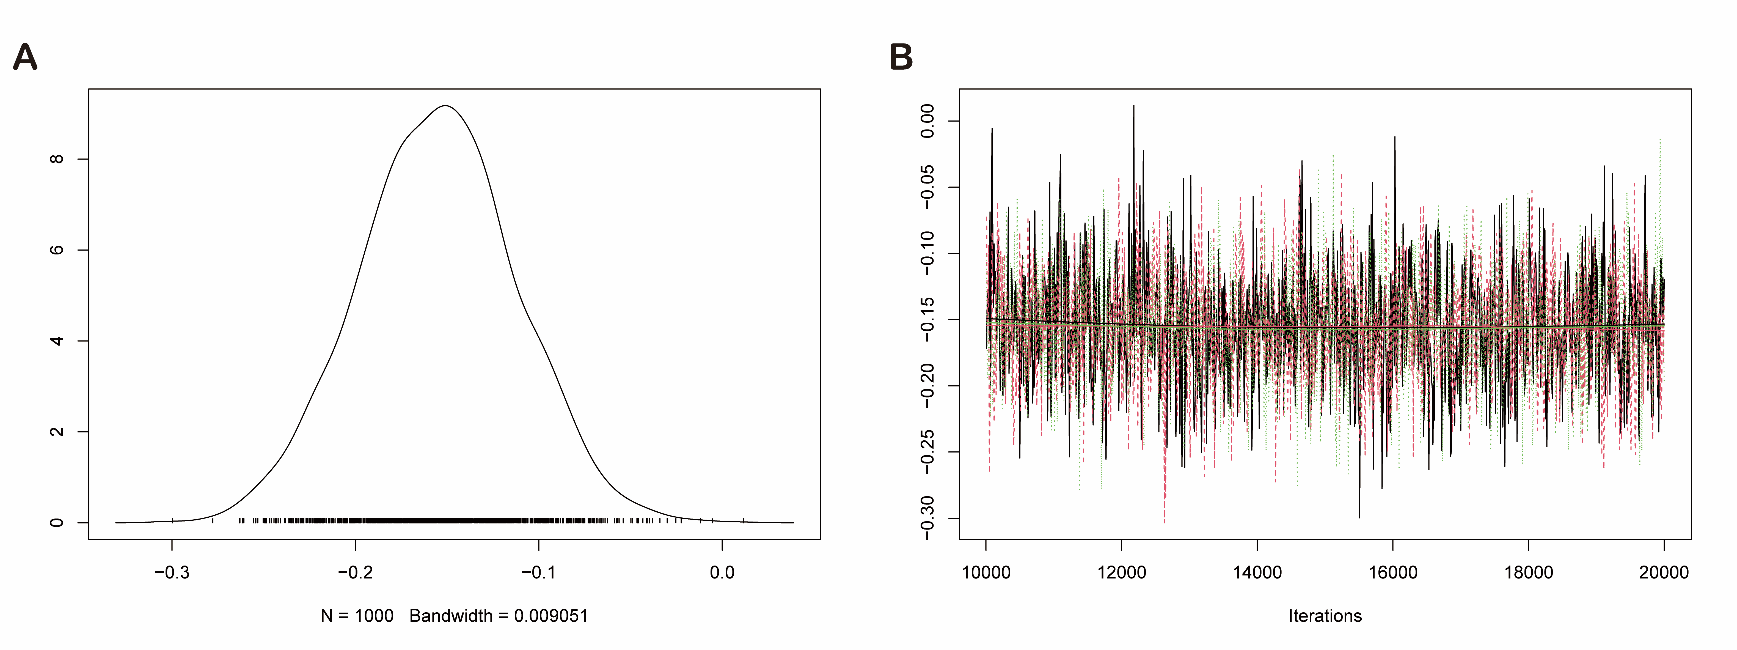 | **Supplementary Figure 1**. The causal relationship between mtDNA-CN and SA using BFMR analysis. (A) The trace plot showed the convergence of the Bayesian model. (B) The density plot depicted the central tendency and uncertainty of parameter estimates. |
| --- | --- |

## Figure S2.

| 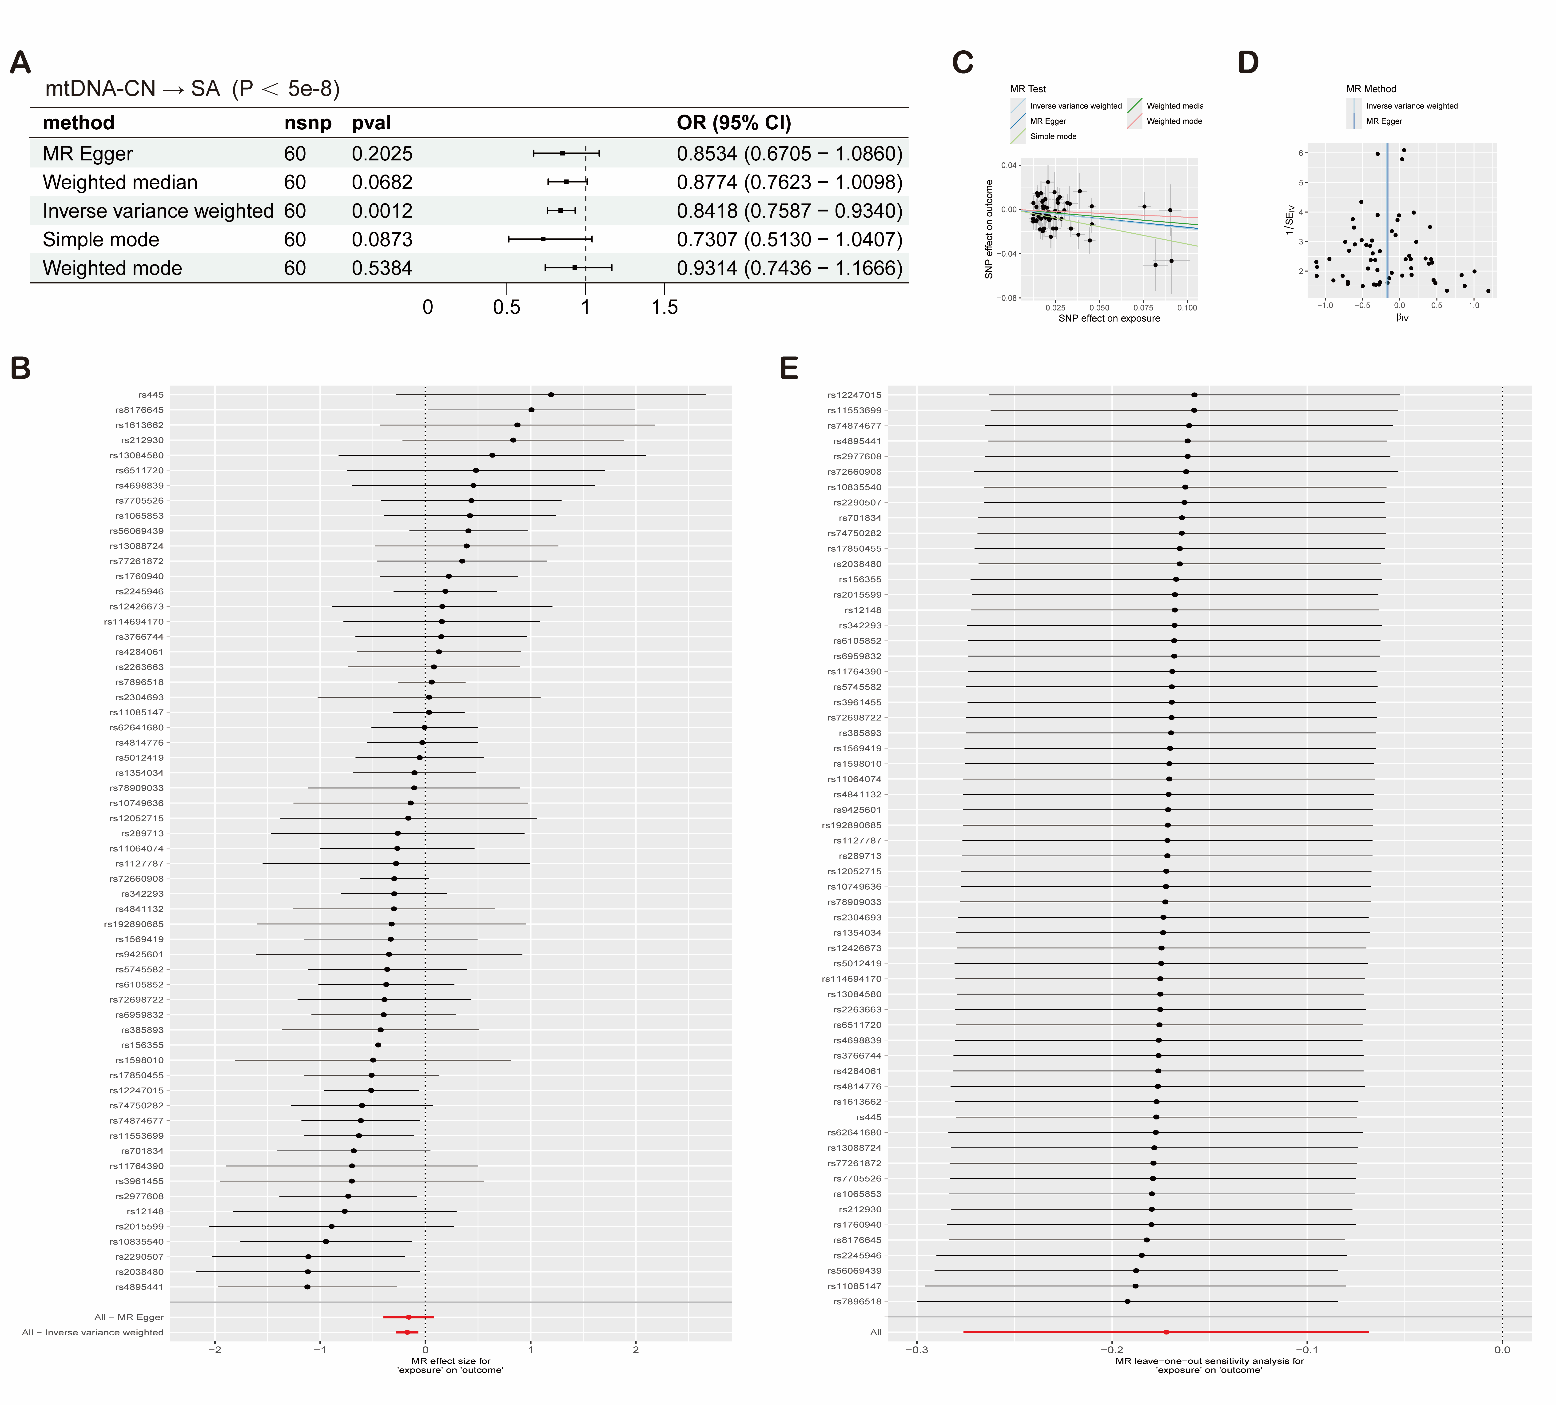 | **Figure S2. Forward causal inference from mtDNA-CN to SA**. (A) A forest plot displayed the statistical results from five analytical methods. (B) A forest plot presented the causal effect estimates for each SNP on SA risk. (C) A scatter plot demonstrated the distribution of SNP effects between the exposure (mtDNA-CN) and the outcome (SA), assessing the linear consistency of the data. (D) A funnel plot evaluated potential systematic bias or pleiotropy, showing no significant evidence of bias. (E) Leave-one-out analysis systematically excluded individual SNPs to evaluate their influence on the overall causal estimate, confirming the robustness of the results. |
| --- | --- |

## Figure S3.

| 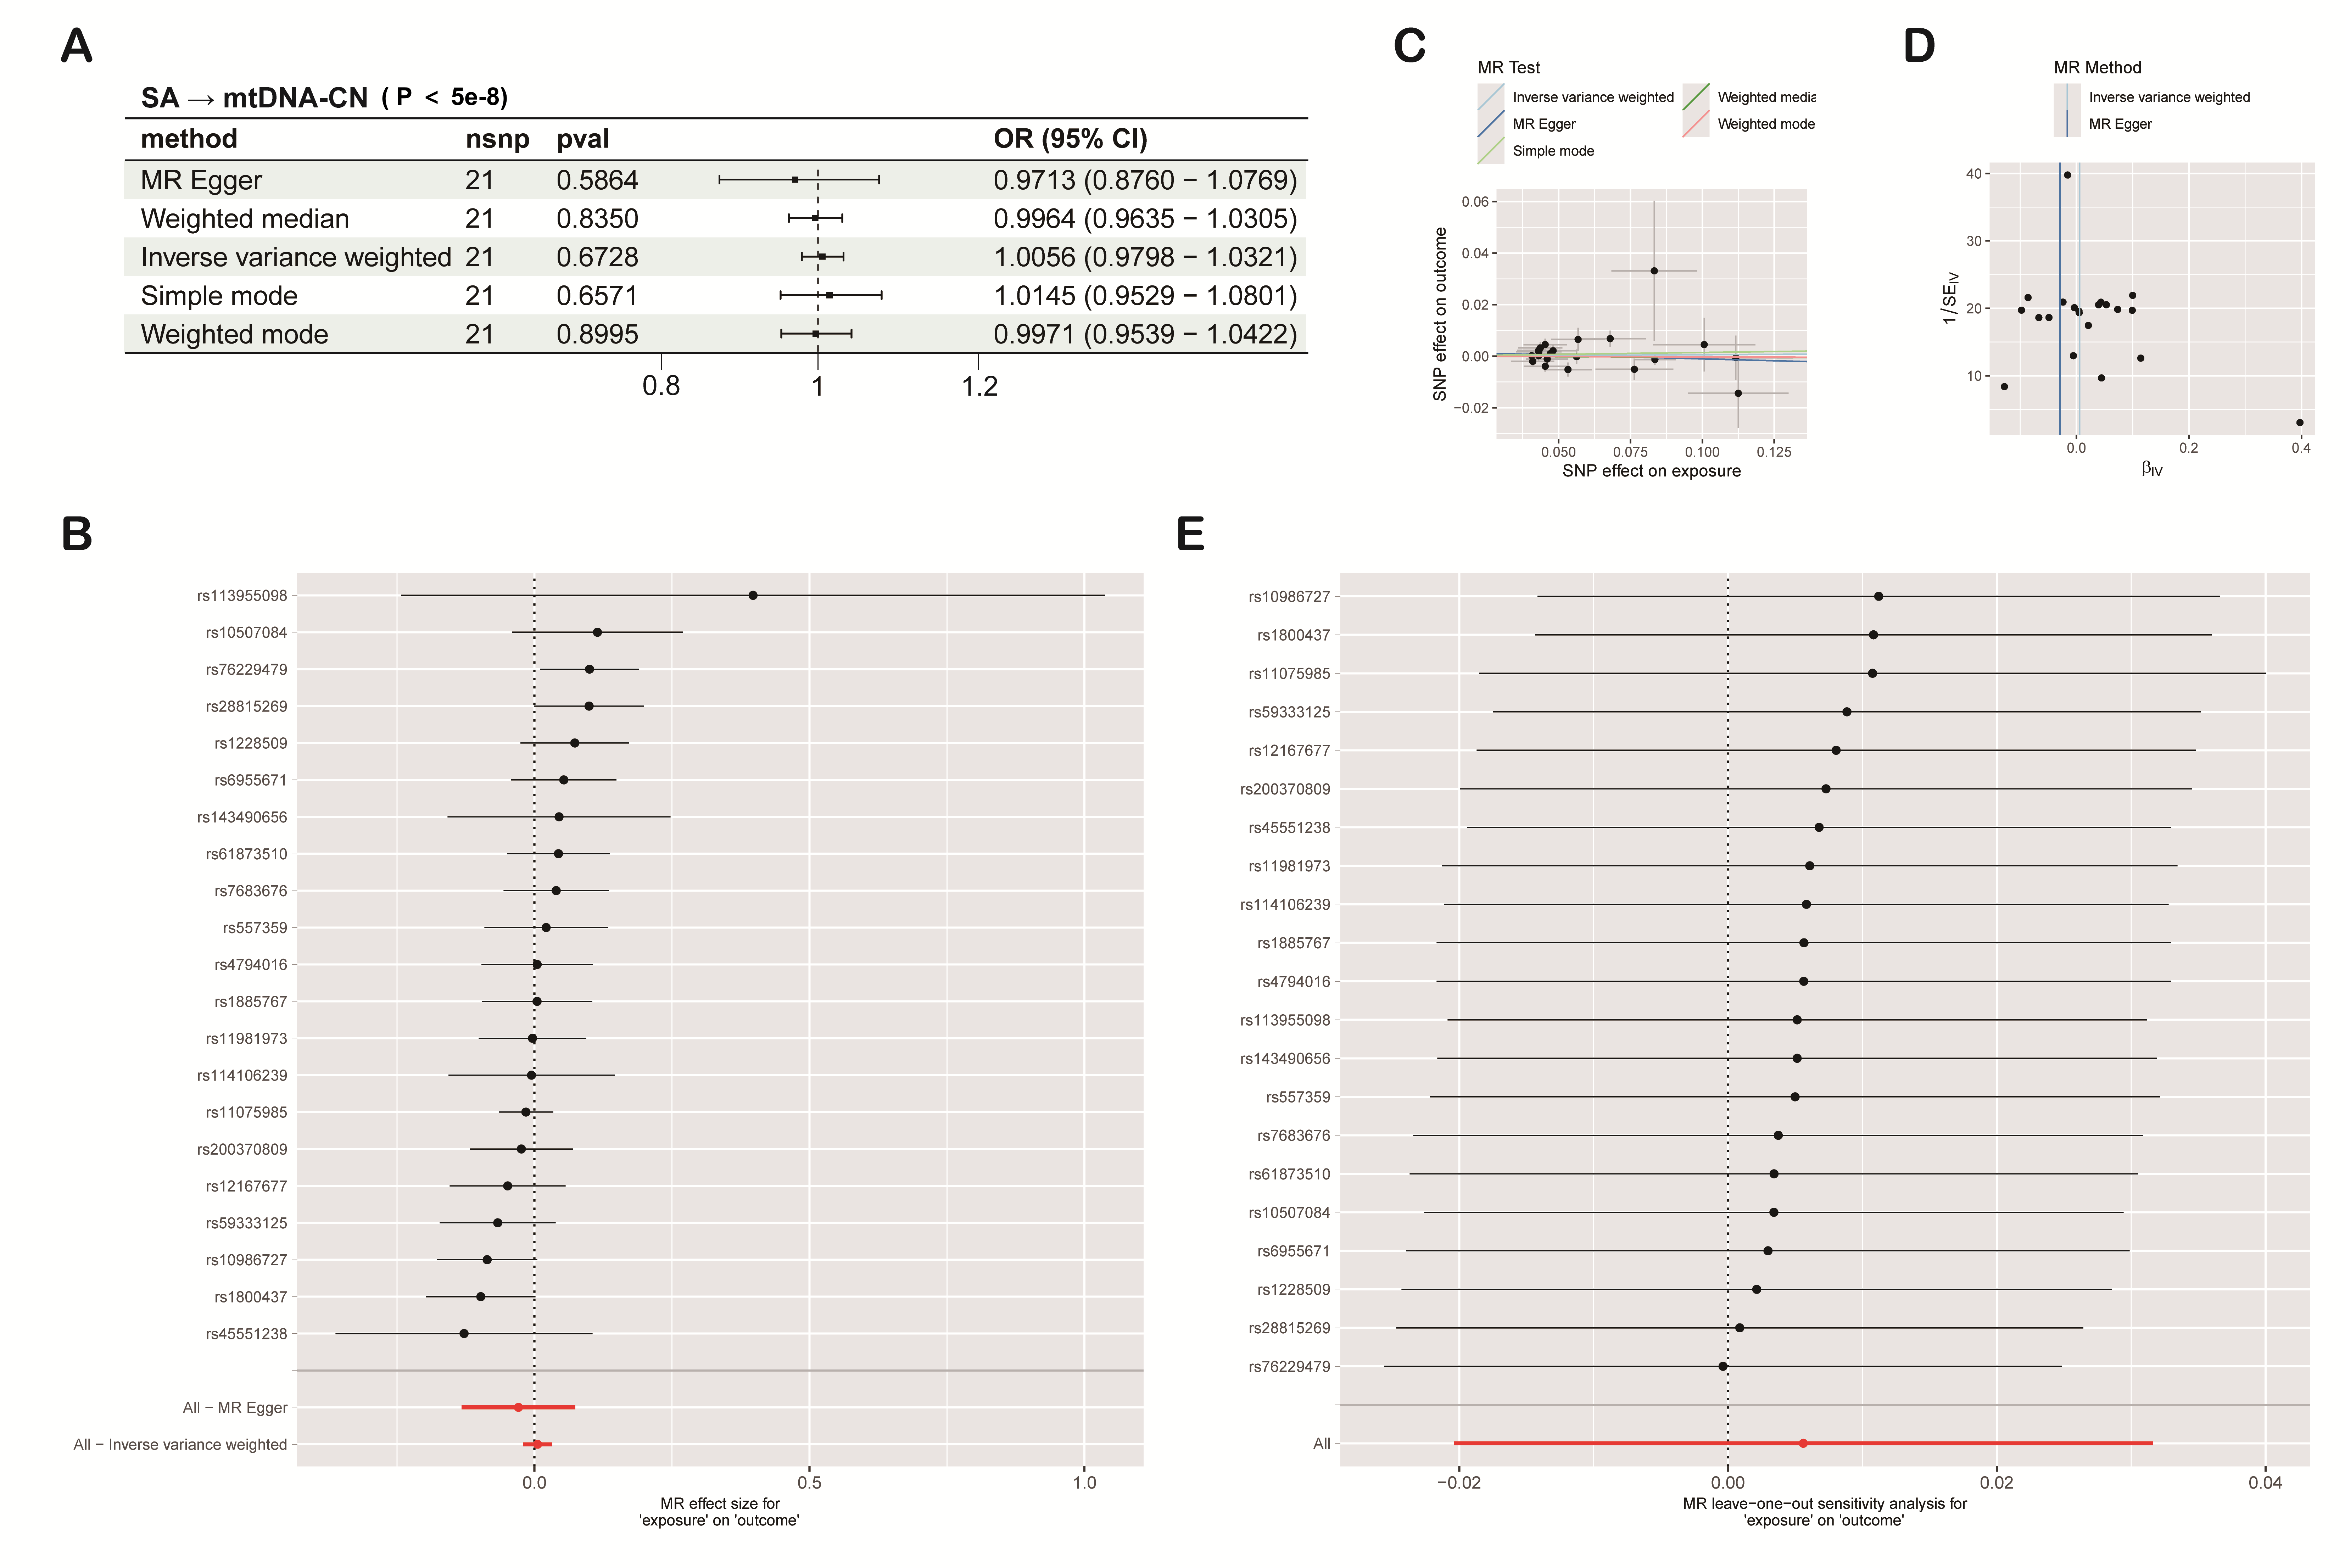 | **Figure S3. Reverse causal inference from SA to mtDNA-CN**. (A) Forest plot showing statistical results from five analytical methods; (B) Forest plot of causal effect estimates for each SNP on mtDNA-CN; (C) Scatter plot; (D) Funnel plot; (E) Leave-one-out analysis. No significant heterogeneity or pleiotropy was detected: MR-Egger intercept = 0.0019 (P = 0.503), MR-PRESSO (RSSobs = 31.503, P = 0.124), and Cochran’s Q = 28.429 (df = 20, P = 0.100, I² = 29.7%). F-statistic = 38.7. |
| --- | --- |

## Figure S4.

| 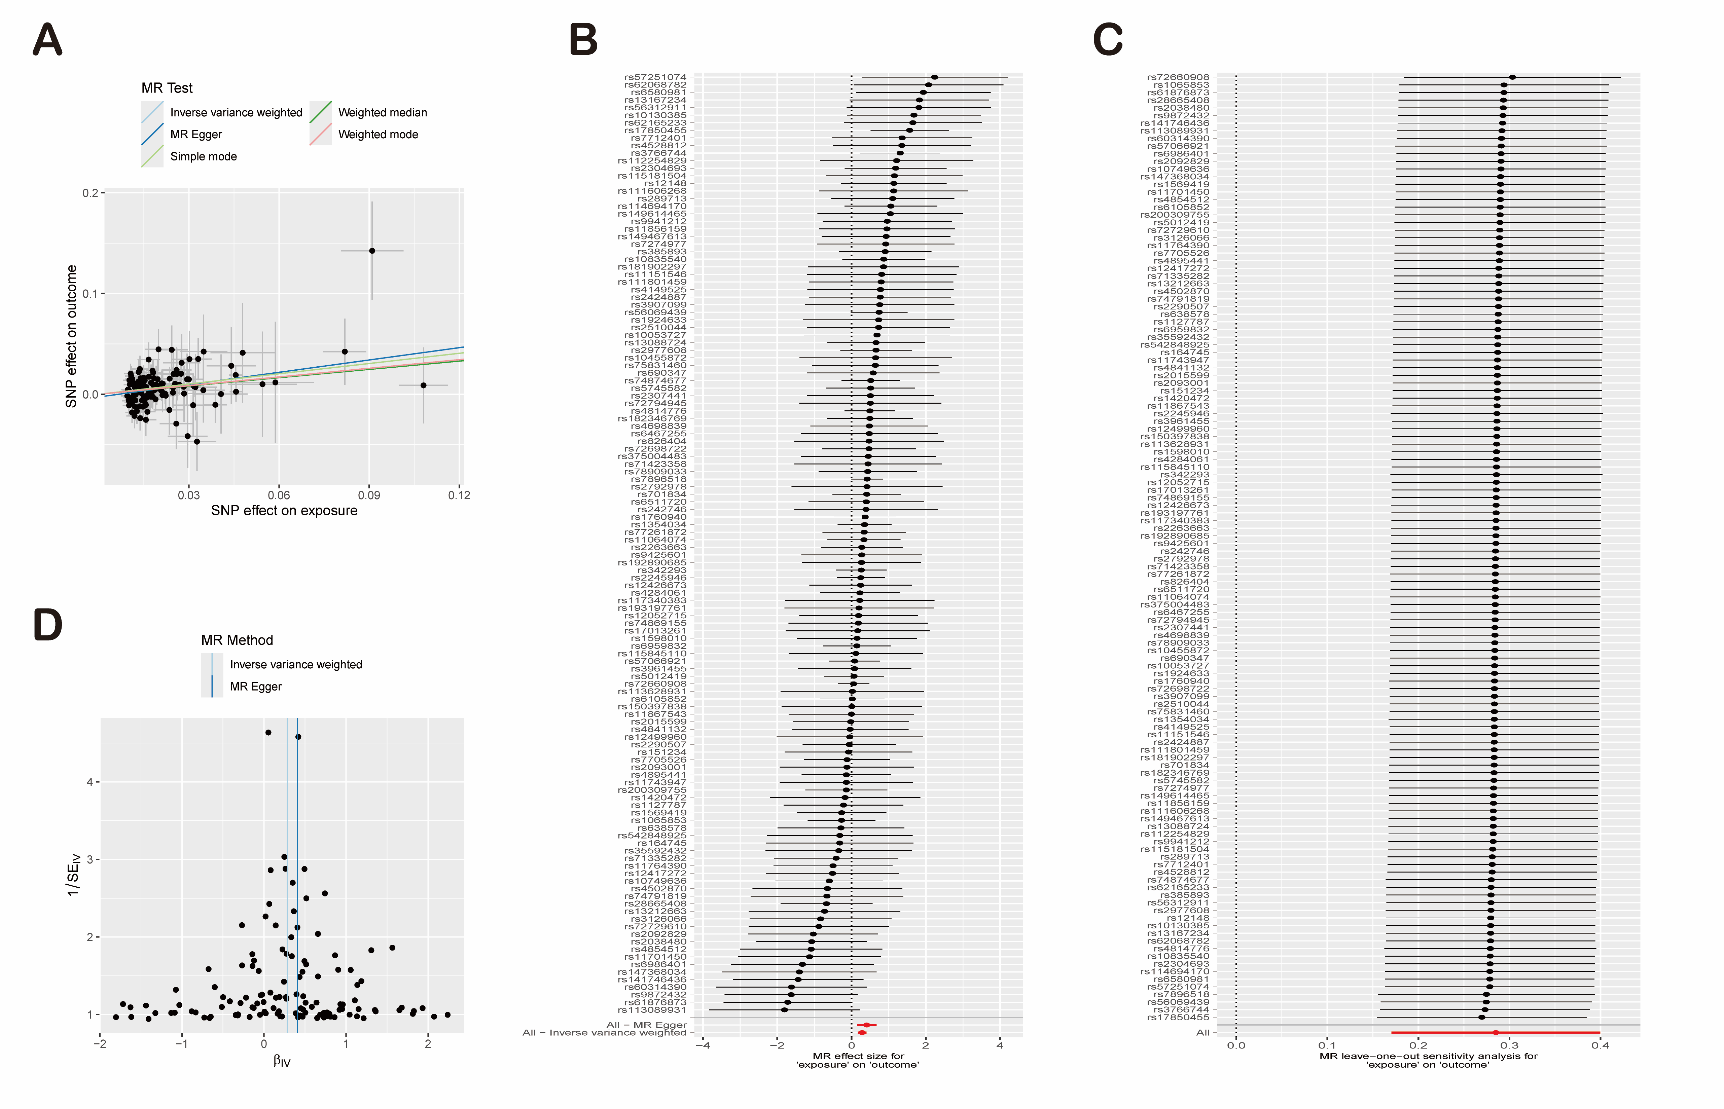 | **Figure S4. Forward causal inference analysis of mtDNA-CN on “rfMRI connectivity (ICA100 edge 527)”.** (A) The scatter plot illustrated the relationship between SNP effects on mtDNA-CN and rfMRI connectivity, assessing linear consistency. (B) The forest plot presented the causal effect estimates for individual SNPs. (C) The leave-one-out analysis demonstrated the robustness of the results by sequentially excluding each SNP. (D) The funnel plot evaluated potential bias or pleiotropy in the analysis. |
| --- | --- |

## Figure S5.

| 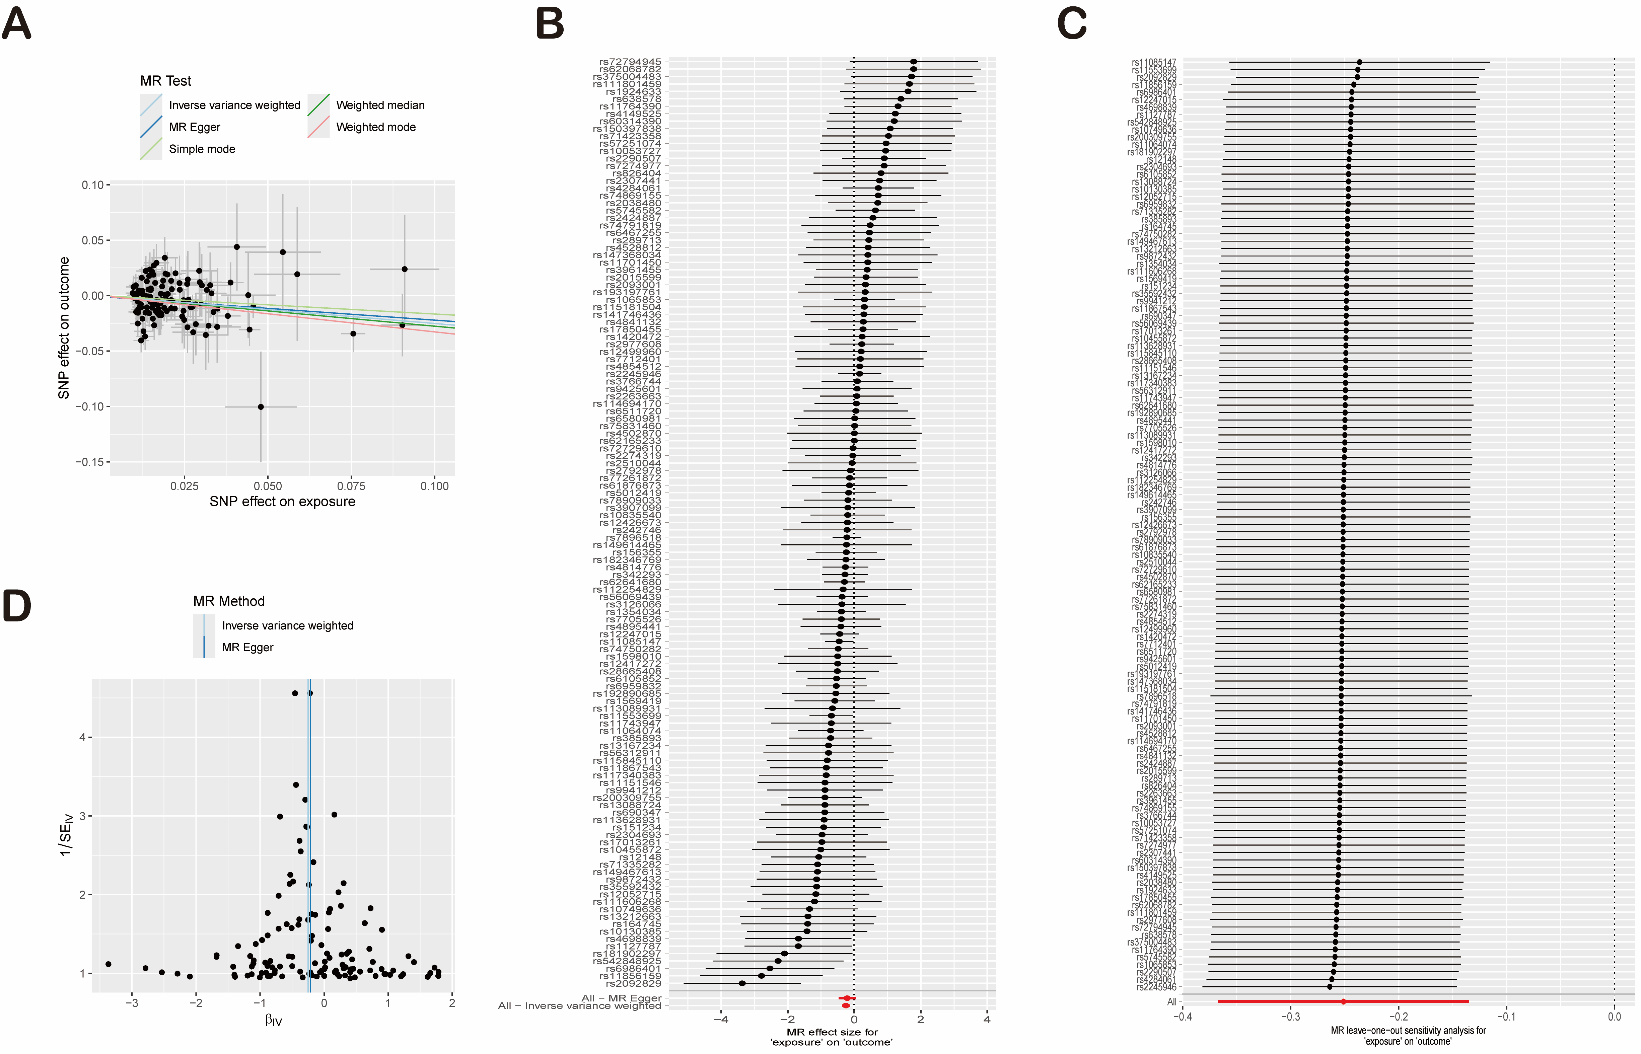 | **Figure S5. Forward causal inference analysis of mtDNA-CN on “IDP dMRI TBSS FA Sagittal stratum R”.** (A) The scatter plot illustrated the relationship between SNP effects on mtDNA-CN and rfMRI connectivity, assessing linear consistency. (B) The forest plot presented the causal effect estimates for individual SNPs. (C) The leave-one-out analysis demonstrated the robustness of the results by sequentially excluding each SNP. (D) The funnel plot evaluated potential bias or pleiotropy in the analysis. |
| --- | --- |

## Figure S6.

| 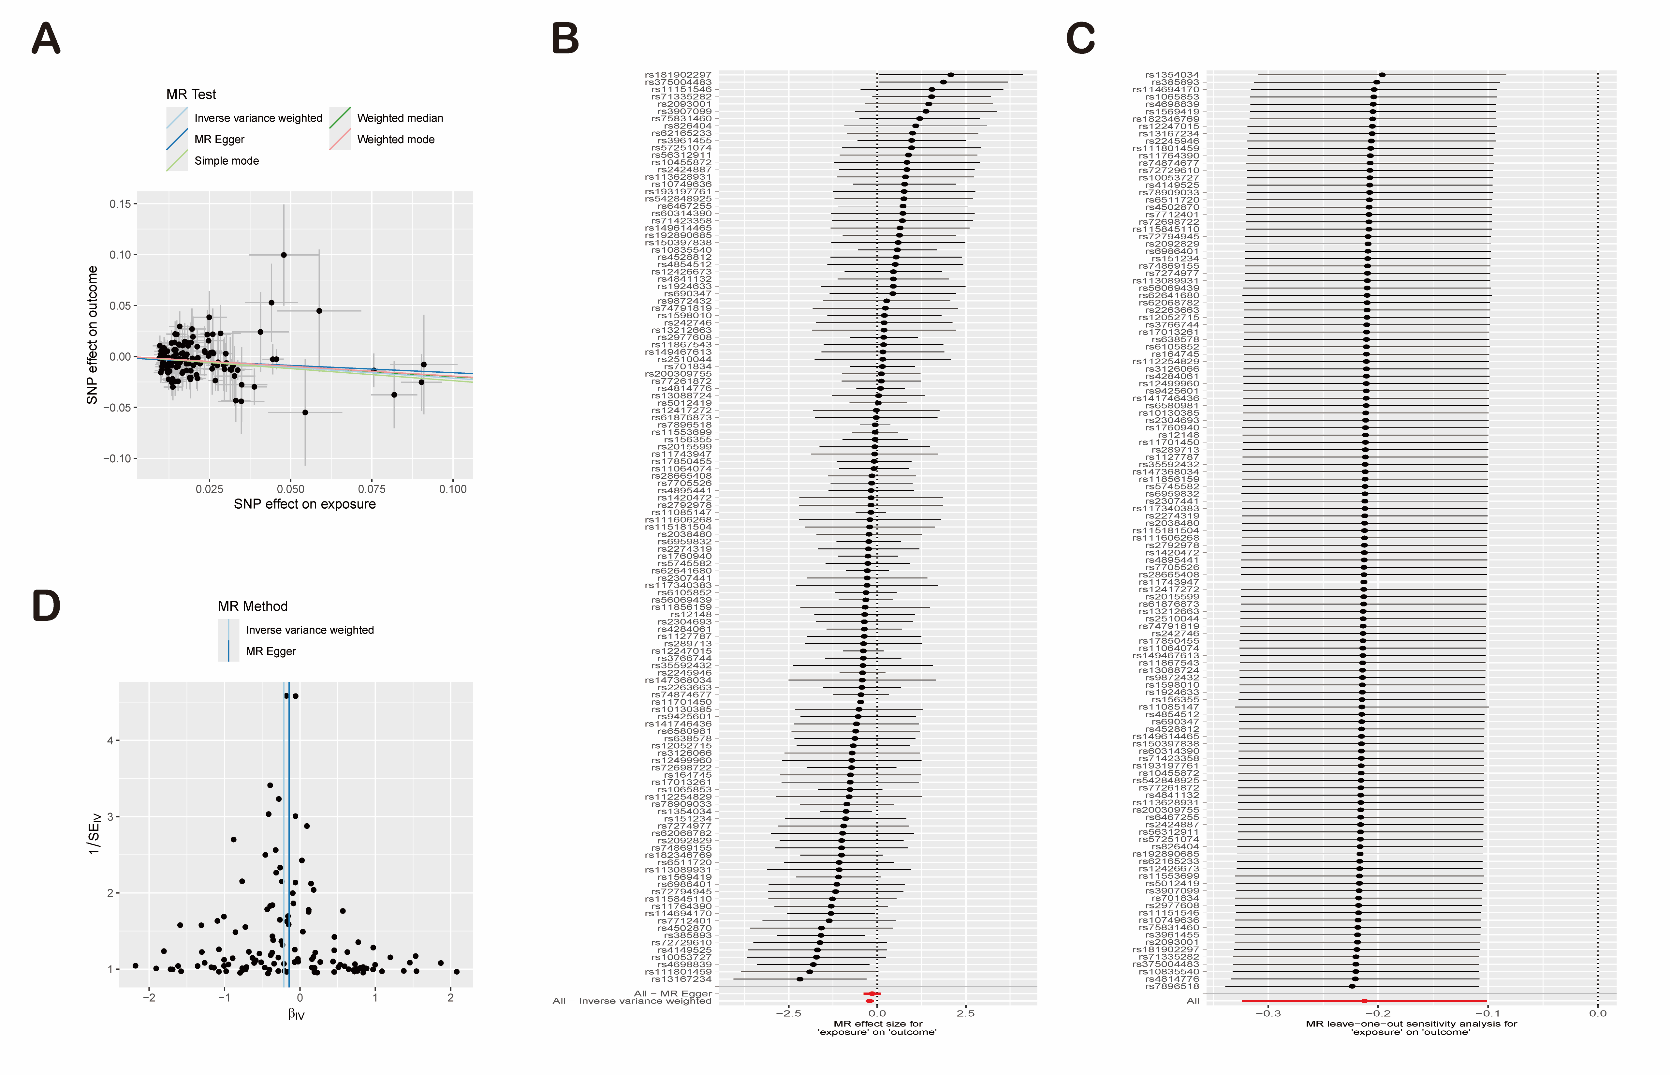 | **Figure S6. Forward causal inference analysis of mtDNA-CN on “rfMRI connectivity (ICA100 edge 553)”**. (A) The scatter plot illustrated the relationship between SNP effects on mtDNA-CN and rfMRI connectivity, assessing linear consistency. (B) The forest plot presented the causal effect estimates for individual SNPs. (C) The leave-one-out analysis demonstrated the robustness of the results by sequentially excluding each SNP. (D) The funnel plot evaluated potential bias or pleiotropy in the analysis. |
| --- | --- |

## Figure S7.

| 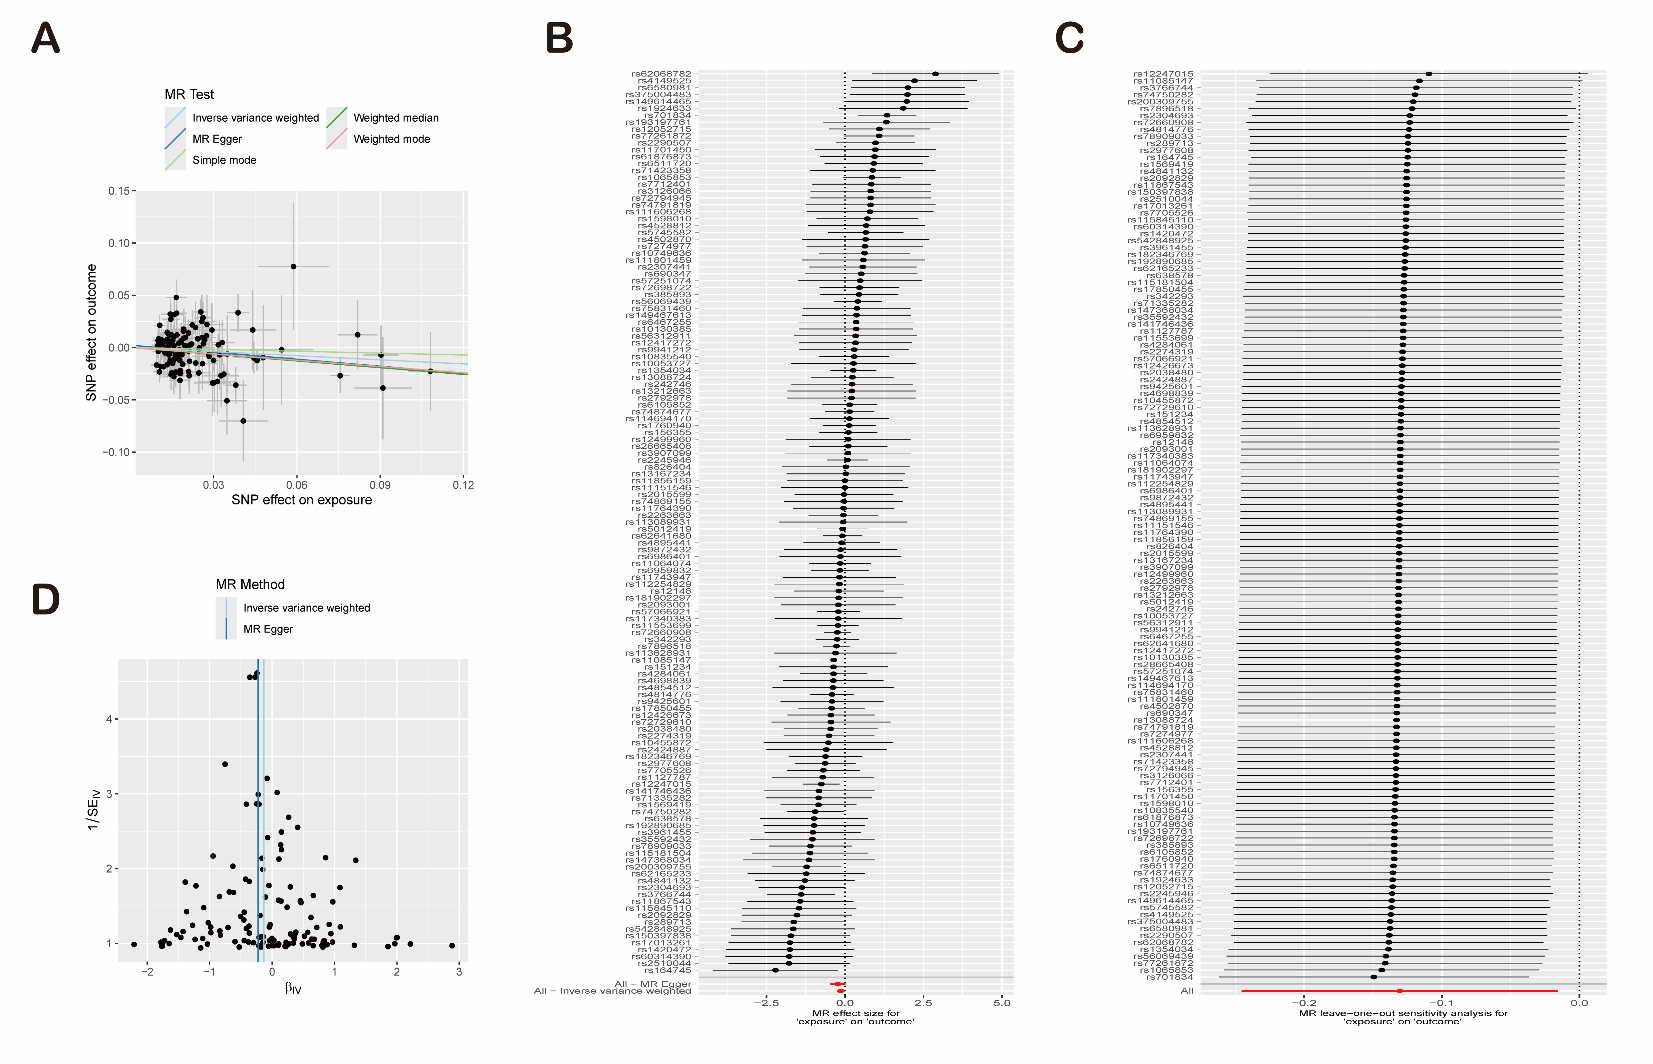 | **Figure S7. Forward causal inference analysis of mtDNA-CN on “IDP dMRI TBSS FA Superior fronto-occipital fasciculus L”**. (A) The scatter plot illustrated the relationship between SNP effects on mtDNA-CN and rfMRI connectivity, assessing linear consistency. (B) The forest plot presented the causal effect estimates for individual SNPs. (C) The leave-one-out analysis demonstrated the robustness of the results by sequentially excluding each SNP. (D) The funnel plot evaluated potential bias or pleiotropy in the analysis. |
| --- | --- |

## Figure S8.

| 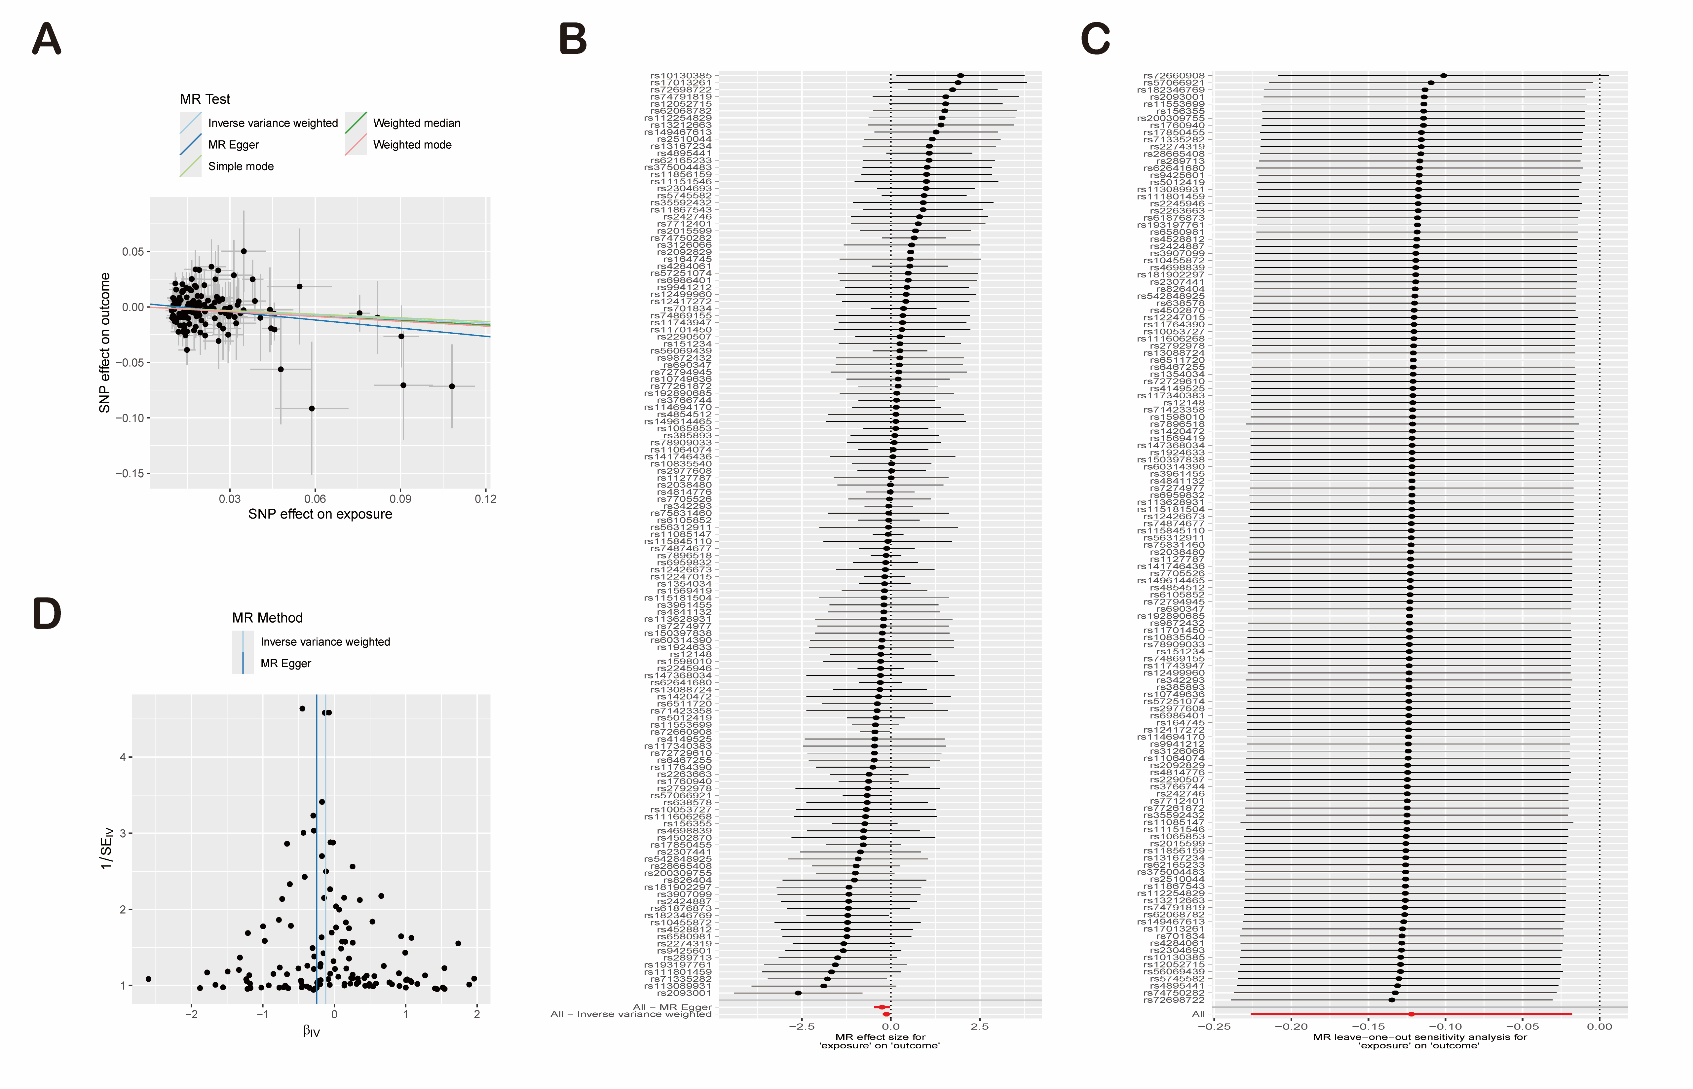 | **Figure S7. Forward causal inference analysis of mtDNA-CN on “rfMRI connectivity (ICA100 edge 379)”**. (A) The scatter plot illustrated the relationship between SNP effects on mtDNA-CN and rfMRI connectivity, assessing linear consistency. (B) The forest plot presented the causal effect estimates for individual SNPs. (C) The leave-one-out analysis demonstrated the robustness of the results by sequentially excluding each SNP. (D) The funnel plot evaluated potential bias or pleiotropy in the analysis. |
| --- | --- |

## Figure S9.

| 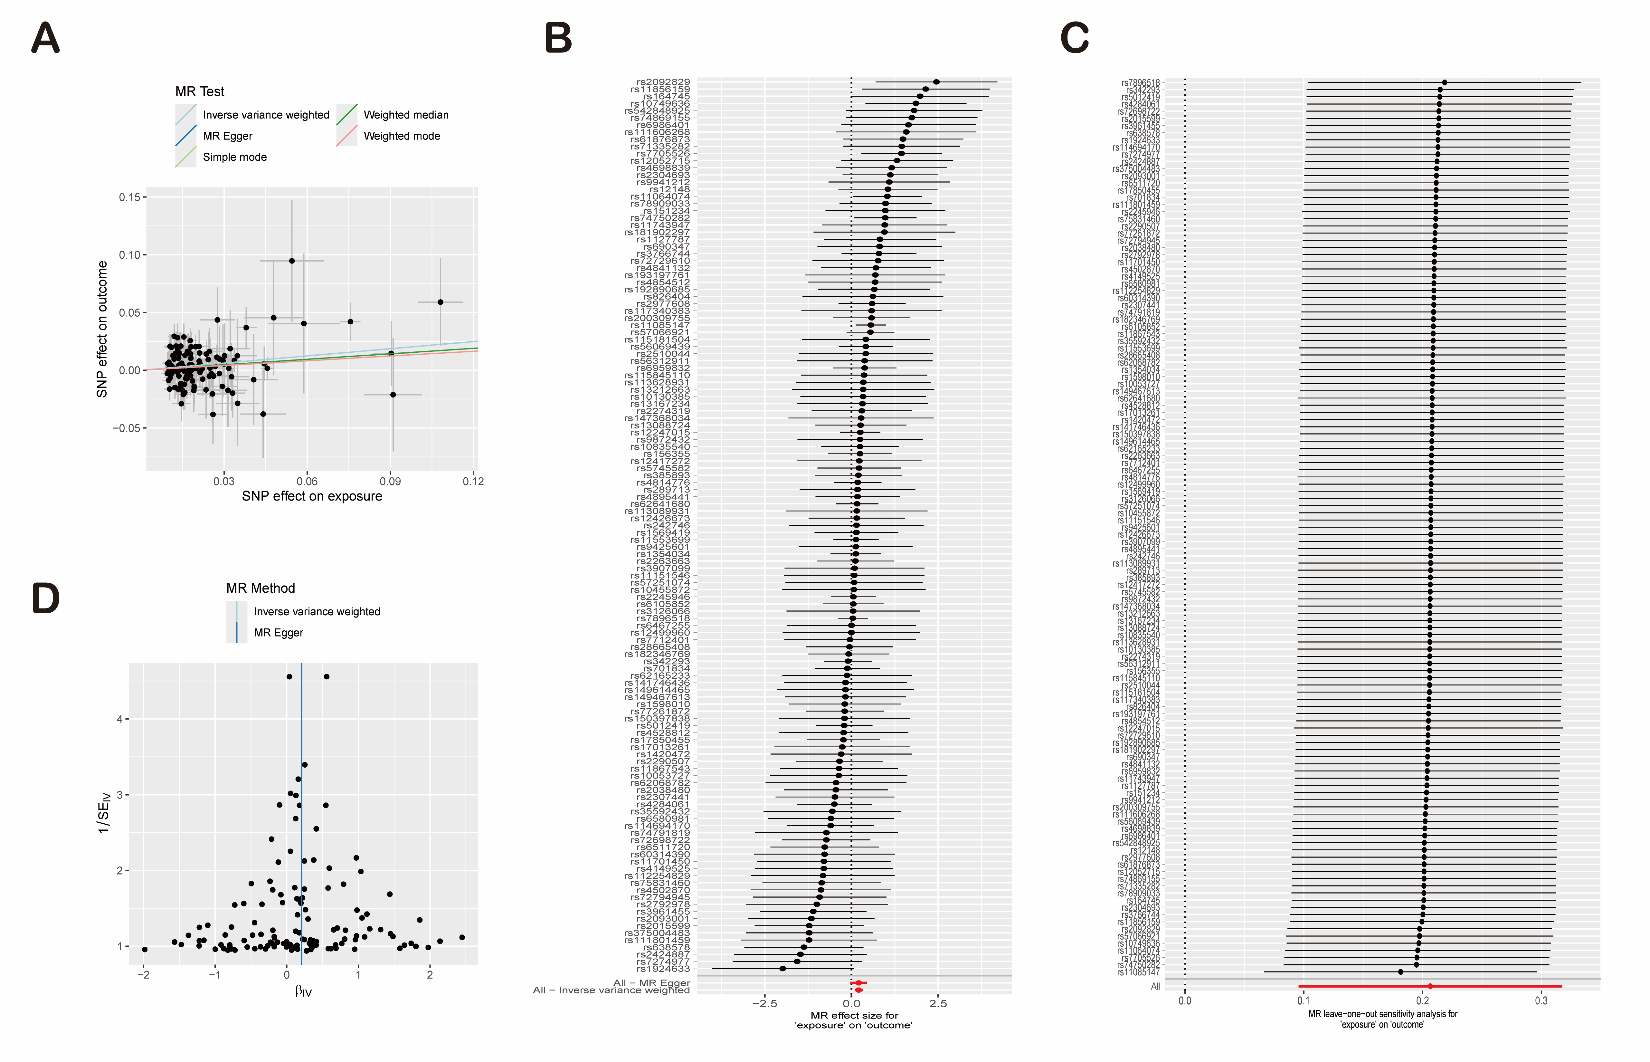 | **Figure S7. Forward causal inference analysis of mtDNA-CN on “IDP dMRI TBSS L2 Posterior thalamic radiation R”.** (A) The scatter plot illustrated the relationship between SNP effects on mtDNA-CN and rfMRI connectivity, assessing linear consistency. (B) The forest plot presented the causal effect estimates for individual SNPs. (C) The leave-one-out analysis demonstrated the robustness of the results by sequentially excluding each SNP. (D) The funnel plot evaluated potential bias or pleiotropy in the analysis. |
| --- | --- |

# Supplementary Tables

## Table S1. STROBE-MR checklist of recommended items to address in reports of Mendelian randomization studies1,2

| **Item No.** | **Section** | **Checklist item** | **Relevant text / Check** |
| --- | --- | --- | --- |
| 1 | **TITLE and ABSTRACT** | Indicate Mendelian randomization (MR) as the study’s design in the title and/or the abstract if that is a main purpose of the study | Completed |
|  | **INTRODUCTION** |  |  |
| 2 | **Background** | Explain the scientific background and rationale for the reported study. What is the exposure? Is a potential causal relationship between exposure and outcome plausible? Justify why MR is a helpful method to address the study question | The study explores the potential causal relationship between mitochondrial DNA copy number (mtDNA-CN) in blood (exposure) and sleep apnea (SA) as the outcome. We hypothesize that mtDNA-CN may directly impact SA or influence it through intermediary factors. Mendelian randomization (MR) is an effective method here, as it reduces confounding and reverse causation, providing a robust approach to assess causality in this observational context. |
| 3 | **Objectives** | State specific objectives clearly, including pre-specified causal hypotheses (if any). State that MR is a method that, under specific assumptions, intends to estimate causal effects | Completed |
|  | **METHODS** |  |  |
| 4 | **Study design and data sources** | Present key elements of the study design early in the article. Consider including a table listing sources of data for all phases of the study. For each data source contributing to the analysis, describe the following: | It is completed. The information sources are shown in Figure 1 and Table S2. |
|  | a) | Setting: Describe the study design and the underlying population, if possible. Describe the setting, locations, and relevant dates, including periods of recruitment, exposure, follow-up, and data collection, when available. | The study design and target population have been described. Specific sampling information can be obtained from the corresponding author's research. |
|  | b) | Participants: Give the eligibility criteria, and the sources and methods of selection of participants. Report the sample size, and whether any power or sample size calculations were carried out prior to the main analysis | Completed |
|  | c) | Describe measurement, quality control and selection of genetic variants | It can be obtained from the data provider's study. |
|  | d) | For each exposure, outcome, and other relevant variables, describe methods of assessment and diagnostic criteria for diseases | Assessment and disease diagnosis criteria can be obtained from the data provider. |
|  | e) | Provide details of ethics committee approval and participant informed consent, if relevant | Completed |
| 5 | **Assumptions** | Explicitly state the three core IV assumptions for the main analysis (relevance, independence and exclusion restriction) as well assumptions for any additional or sensitivity analysis | To satisfy the relevance assumption, we ensured a strong association between genetic variants and the exposure (P < 1 × 10^-5, F > 10). Potential confounders were excluded using the LDtrait tool, and independence was verified through sensitivity analyses and MR-Egger intercept tests, confirming no association between instrumental variables and confounders. The exclusion restriction assumption was addressed by verifying that those instrumental variables had no significant direct effect on the outcome, supported by MR-Egger intercept tests and pleiotropy testing with MR-PRESSO. |
| 6 | **Statistical methods: main analysis** | Describe statistical methods and statistics used | Completed |
|  | a) | Describe how quantitative variables were handled in the analyses (i.e., scale, units, model) | The data provider has supplied various calculations for quantitative variables. |
|  | b) | Describe how genetic variants were handled in the analyses and, if applicable, how their weights were selected | Genetic variants were handled by selecting SNPs strongly associated with the exposure, with weights based on their beta coefficients. Effect allele frequency (EAF) was considered to ensure representativeness in the target population. |
|  | c) | Describe the MR estimator (e.g. two-stage least squares, Wald ratio) and related statistics. Detail the included covariates and, in case of two-sample MR, whether the same covariate set was used for adjustment in the two samples | We employed the inverse-variance weighted (IVW) estimator for multiple SNPs, with beta coefficients and EAF for weighting. The causal effect estimate, standard errors, and confidence intervals were calculated. No additional covariates were included, as the genetic approach in MR inherently minimizes confounding. |
|  | d) | Explain how missing data were addressed | In this study, missing data for SNPs were addressed by applying an EAF-adding function, which retrieves effect allele frequencies (EAF) from external databases based on population and build specifications. The ldLink R package was used for handling confounding factors, while SNP conversion and data processing were supported by packages including TwoSampleMR, ggplot2, BSgenome, and data.table. Additionally, standardized formulas were used for calculating R² and F-statistics, ensuring consistent methodological rigor. |
|  | e) | If applicable, indicate how multiple testing was addressed | FDR correction was performed using the Benjamini‒Hochberg (BH) method. |
| 7 | **Assessment of assumptions** | Describe any methods or prior knowledge used to assess the assumptions or justify their validity | To satisfy the relevance assumption, we ensured a strong association between genetic variants and the exposure (P < 1 × 10^-5, F > 10). Potential confounders were excluded using the LDlinkR tool, and independence was verified through sensitivity analyses and MR-Egger intercept tests, confirming no association between instrumental variables and confounders. The exclusion restriction assumption was addressed by verifying that IVs had no significant direct effect on the outcome, supported by MR-Egger intercept tests and pleiotropy testing with MR-PRESSO. |
| 8 | **Sensitivity analyses and additional analyses** | Describe any sensitivity analyses or additional analyses performed (e.g. comparison of effect estimates from different approaches, independent replication, bias analytic techniques, validation of instruments, simulations) | We conducted sensitivity analyses, including MR-Egger regression, MR-PRESSO, and comparisons of effect estimates across different MR methods, to confirm robustness and detect pleiotropy, ensuring reliability of our causal estimates. |
| 9 | **Software and pre-registration** |  | Completed |
|  | a) | Name statistical software and package(s), including version and settings used | It can be found in the Materials and Methods section |
|  | b) | State whether the study protocol and details were pre-registered (as well as when and where) | The data provider has already been registered. |
|  | **RESULTS** |  |  |
| 10 | **Descriptive data** |  |  |
|  | a) | Report the numbers of individuals at each stage of included studies and reasons for exclusion. Consider use of a flow diagram | Information was given in the "Data sources" section of the Materials and methods. |
|  | b) | Report summary statistics for phenotypic exposure(s), outcome(s), and other relevant variables (e.g. means, SDs, proportions) | We reported detailed information in Table S3, Table S4, and Table S8. |
|  | c) | If the data sources include meta-analyses of previous studies, provide the assessments of heterogeneity across these studies | The data sources didn’t include meta-analyses of previous studies. |
|  | d) | For two-sample MR:  i.  Provide justification of the similarity of the genetic variant-exposure associations between the exposure and outcome samples  ii.  Provide information on the number of individuals who overlap between the exposure and outcome studies | We give this information, when available, in the "Data sources" section. |
| 11 | **Main results** |  |  |
|  | a) | Report the associations between genetic variant and exposure, and between genetic variant and outcome, preferably on an interpretable scale | Completed |
|  | b) | Report MR estimates of the relationship between exposure and outcome, and the measures of uncertainty from the MR analysis, on an interpretable scale, such as odds ratio or relative risk per SD difference | Completed |
|  | c) | If relevant, consider translating estimates of relative risk into absolute risk for a meaningful time period | Completed |
|  | d) | Consider plots to visualize results (e.g. forest plot, scatterplot of associations between genetic variants and outcome versus between genetic variants and exposure) | Completed |
| 12 | **Assessment of assumptions** |  |  |
|  | a) | Report the assessment of the validity of the assumptions | Completed |
|  | b) | Report any additional statistics (e.g., assessments of heterogeneity across genetic variants, such as *I2*, Q statistic or E-value) | Completed |
| 13 | **Sensitivity analyses and additional analyses** |  |  |
|  | a) | Report any sensitivity analyses to assess the robustness of the main results to violations of the assumptions | Completed |
|  | b) | Report results from other sensitivity analyses or additional analyses | Completed |
|  | c) | Report any assessment of direction of causal relationship (e.g., bidirectional MR) | Completed |
|  | d) | When relevant, report and compare with estimates from non-MR analyses | Completed |
|  | e) | Consider additional plots to visualize results (e.g., leave-one-out analyses) | Completed |
|  | **DISCUSSION** |  |  |
| 14 | **Key results** | Summarize key results with reference to study objectives | Completed |
| 15 | **Limitations** | Discuss limitations of the study, taking into account the validity of the IV assumptions, other sources of potential bias, and imprecision. Discuss both direction and magnitude of any potential bias and any efforts to address them | We reported the limitations of the data analysis and employed numerous methods to minimize potential bias. |
| 16 | **Interpretation** |  |  |
|  | a) | Meaning: Give a cautious overall interpretation of results in the context of their limitations and in comparison with other studies | We reported the limitations of this study as thoroughly as possible. |
|  | b) | Mechanism: Discuss underlying biological mechanisms that could drive a potential causal relationship between the investigated exposure and the outcome, and whether the gene-environment equivalence assumption is reasonable. Use causal language carefully, clarifying that IV estimates may provide causal effects only under certain assumptions | Completed |
|  | c) | Clinical relevance: Discuss whether the results have clinical or public policy relevance, and to what extent they inform effect sizes of possible interventions | Completed |
| 17 | **Generalizability** | Discuss the generalizability of the study results (a) to other populations, (b) across other exposure periods/timings, and (c) across other levels of exposure | (a) Our study was conducted in a European population, which may limit its applicability to other demographic or geographic groups. Future studies should validate these findings in more diverse populations.  (b) The exposure period was based on the time of data collection, which may not fully capture effects at different timings. Further research is needed to explore varying exposure periods.  (c) Our study focused on mtDNA-CN levels in blood, and additional studies are required to confirm these results across a wider range of exposure levels. |
|  | **OTHER INFORMATION** |  |  |
| 18 | **Funding** | Describe sources of funding and the role of funders in the present study and, if applicable, sources of funding for the databases and original study or studies on which the present study is based | Completed |
| 19 | **Data and data sharing** | Provide the data used to perform all analyses or report where and how the data can be accessed, and reference these sources in the article. Provide the statistical code needed to reproduce the results in the article, or report whether the code is publicly accessible and if so, where | We described the code used in this study and provided as much relevant data as possible in the supplementary materials. |
| 20 | **Conflicts of Interest** | All authors should declare all potential conflicts of interest | No |

This checklist is copyrighted by the Equator Network under the Creative Commons Attribution 3.0 Unported (CC BY 3.0) license.

1. Skrivankova VW, Richmond RC, Woolf BAR, Yarmolinsky J, Davies NM, Swanson SA, et al. Strengthening the Reporting of Observational Studies in Epidemiology using Mendelian Randomization (STROBE-MR) Statement. JAMA. 2021;under review.

2. Skrivankova VW, Richmond RC, Woolf BAR, Davies NM, Swanson SA, VanderWeele TJ, et al. Strengthening the Reporting of Observational Studies in Epidemiology using Mendelian Randomisation (STROBE-MR): Explanation and Elaboration. BMJ. 2021;375:n2233.

## Table S2. Dataset description.

| Phenotype | Sample size | Cohort/consortium | Year of Publication | Ancestry | Data source |
| --- | --- | --- | --- | --- | --- |
| mitochondrial DNA copy number | 395781 | UKBiobank | 2022 | European | <https://gwas.mrcieu.ac.uk/datasets/ebi-a-GCST90026371/> |
| 3144 Brain Imaging-derived Phenotypes | 33224 | UK Biobank | 2021 | European | <https://www.nature.com/articles/s41593-021-00826-4> |
| Sleep Apnea | 410385 | FinnGen | 2023 | European | <https://storage.googleapis.com/finngen-public-data-r10/summary_stats/finngen_R10_G6_SLEEPAPNO.gz> |

## Table S3. The SNPs selected as instrumental variables (IVs) of mtDNA-CN.

| Exposure | Outcome | SNP | effect_allele | other_allele | Eaf. exposure | Maf.  exposure | Beta.  exposure | Se.  exposure | sample size | Pval.  exposure | R2 | F statistics | pval.outcome |
| --- | --- | --- | --- | --- | --- | --- | --- | --- | --- | --- | --- | --- | --- |
| mtDNA-CN | SA | rs10130385 | C | T | 0.56560 | 0.56560 | -0.01080 | 0.00210 | 395781 | 3.96E-07 | 6.68E-05 | 26.45 | 0.32 |
| mtDNA-CN | SA | rs10455872 | G | A | 0.07360 | 0.92640 | -0.01740 | 0.00390 | 395781 | 7.57E-06 | 5.03E-05 | 19.91 | 0.75 |
| mtDNA-CN | SA | rs1065853 | T | G | 0.06260 | 0.93740 | 0.03880 | 0.00390 | 395781 | 1.59E-23 | 2.50E-04 | 98.98 | 0.31 |
| mtDNA-CN | SA | rs10749636 | A | G | 0.76940 | 0.76940 | 0.01550 | 0.00250 | 395781 | 5.43E-10 | 9.71E-05 | 38.44 | 0.81 |
| mtDNA-CN | SA | rs10835540 | A | T | 0.33300 | 0.66700 | 0.01840 | 0.00230 | 395781 | 5.74E-16 | 1.62E-04 | 64.00 | 0.02 |
| mtDNA-CN | SA | rs11064074 | T | C | 0.42940 | 0.57060 | 0.01970 | 0.00210 | 395781 | 4.87E-20 | 2.22E-04 | 88.00 | 0.48 |
| mtDNA-CN | SA | rs11085147 | T | C | 0.08650 | 0.91350 | 0.07560 | 0.00360 | 395781 | 1.54E-95 | 1.11E-03 | 441.00 | 0.85 |
| mtDNA-CN | SA | rs11151546 | C | T | 0.96120 | 0.96120 | -0.02490 | 0.00550 | 395781 | 7.19E-06 | 5.18E-05 | 20.50 | 0.11 |
| mtDNA-CN | SA | rs111606268 | C | T | 0.03080 | 0.96920 | -0.02760 | 0.00620 | 395781 | 7.70E-06 | 5.01E-05 | 19.82 | 0.87 |
| mtDNA-CN | SA | rs111801459 | T | C | 0.16200 | 0.83800 | 0.01340 | 0.00290 | 395781 | 3.55E-06 | 5.40E-05 | 21.35 | 0.68 |
| mtDNA-CN | SA | rs112254829 | T | C | 0.01790 | 0.98210 | -0.03490 | 0.00790 | 395781 | 9.84E-06 | 4.93E-05 | 19.52 | 0.86 |
| mtDNA-CN | SA | rs1127787 | A | G | 0.17300 | 0.82700 | -0.01590 | 0.00280 | 395781 | 1.49E-08 | 8.15E-05 | 32.25 | 0.67 |
| mtDNA-CN | SA | rs113089931 | A | G | 0.23660 | 0.76340 | -0.01190 | 0.00270 | 395781 | 9.02E-06 | 4.91E-05 | 19.43 | 0.57 |
| mtDNA-CN | SA | rs113628931 | G | C | 0.02190 | 0.97810 | 0.02840 | 0.00620 | 395781 | 4.37E-06 | 5.30E-05 | 20.98 | 0.48 |
| mtDNA-CN | SA | rs114694170 | C | T | 0.05370 | 0.94630 | 0.03310 | 0.00450 | 395781 | 3.04E-13 | 1.37E-04 | 54.10 | 0.74 |
| mtDNA-CN | SA | rs115181504 | G | A | 0.03080 | 0.96920 | 0.03020 | 0.00610 | 395781 | 8.78E-07 | 6.19E-05 | 24.51 | 0.24 |
| mtDNA-CN | SA | rs11553699 | G | A | 0.11930 | 0.88070 | 0.04450 | 0.00320 | 395781 | 1.45E-43 | 4.88E-04 | 193.38 | 0.02 |
| mtDNA-CN | SA | rs115845110 | C | T | 0.01490 | 0.98510 | 0.03480 | 0.00710 | 395781 | 8.92E-07 | 6.07E-05 | 24.02 | 0.92 |
| mtDNA-CN | SA | rs11701450 | G | C | 0.05470 | 0.94530 | 0.02580 | 0.00550 | 395781 | 2.28E-06 | 5.56E-05 | 22.00 | 0.36 |
| mtDNA-CN | SA | rs117340383 | T | C | 0.01690 | 0.98310 | 0.03220 | 0.00700 | 395781 | 4.90E-06 | 5.35E-05 | 21.16 | 0.75 |
| mtDNA-CN | SA | rs11743947 | T | C | 0.09440 | 0.90560 | -0.01720 | 0.00340 | 395781 | 6.04E-07 | 6.47E-05 | 25.59 | 0.16 |
| mtDNA-CN | SA | rs11764390 | A | G | 0.45430 | 0.54570 | -0.01220 | 0.00220 | 395781 | 1.55E-08 | 7.77E-05 | 30.75 | 0.25 |
| mtDNA-CN | SA | rs11856159 | T | C | 0.18390 | 0.81610 | -0.01320 | 0.00270 | 395781 | 6.67E-07 | 6.04E-05 | 23.90 | 0.90 |
| mtDNA-CN | SA | rs11867543 | T | C | 0.16200 | 0.83800 | 0.01640 | 0.00310 | 395781 | 8.17E-08 | 7.07E-05 | 27.99 | 0.79 |
| mtDNA-CN | SA | rs12052715 | G | C | 0.69380 | 0.69380 | -0.01330 | 0.00240 | 395781 | 1.72E-08 | 7.76E-05 | 30.71 | 0.79 |
| mtDNA-CN | SA | rs12148 | G | T | 0.61830 | 0.61830 | -0.01390 | 0.00220 | 395781 | 1.32E-10 | 1.01E-04 | 39.92 | 0.16 |
| mtDNA-CN | SA | rs12247015 | G | A | 0.42450 | 0.57550 | 0.03370 | 0.00210 | 395781 | 1.28E-55 | 6.50E-04 | 257.52 | 0.03 |
| mtDNA-CN | SA | rs12417272 | G | A | 0.41950 | 0.58050 | 0.01100 | 0.00220 | 395781 | 3.78E-07 | 6.32E-05 | 25.00 | 0.78 |
| mtDNA-CN | SA | rs12426673 | T | G | 0.62330 | 0.62330 | -0.01410 | 0.00210 | 395781 | 4.03E-11 | 1.14E-04 | 45.08 | 0.76 |
| mtDNA-CN | SA | rs12499960 | G | A | 0.75550 | 0.75550 | 0.01170 | 0.00250 | 395781 | 3.74E-06 | 5.53E-05 | 21.90 | 0.41 |
| mtDNA-CN | SA | rs13084580 | T | C | 0.10140 | 0.89860 | 0.02440 | 0.00330 | 395781 | 2.19E-13 | 1.38E-04 | 54.67 | 0.39 |
| mtDNA-CN | SA | rs13088724 | A | G | 0.25840 | 0.74160 | 0.01750 | 0.00260 | 395781 | 7.70E-12 | 1.14E-04 | 45.30 | 0.38 |
| mtDNA-CN | SA | rs13167234 | G | A | 0.84190 | 0.84190 | -0.01370 | 0.00280 | 395781 | 1.55E-06 | 6.05E-05 | 23.94 | 0.27 |
| mtDNA-CN | SA | rs1354034 | C | T | 0.59940 | 0.59940 | -0.02680 | 0.00220 | 395781 | 2.05E-35 | 3.75E-04 | 148.40 | 0.73 |
| mtDNA-CN | SA | rs141746436 | A | G | 0.04170 | 0.95830 | 0.03270 | 0.00640 | 395781 | 3.02E-07 | 6.60E-05 | 26.11 | 0.35 |
| mtDNA-CN | SA | rs1420472 | T | G | 0.41550 | 0.58450 | 0.00950 | 0.00210 | 395781 | 9.01E-06 | 5.17E-05 | 20.46 | 0.30 |
| mtDNA-CN | SA | rs144344009 | C | T | 0.04570 | 0.95430 | 0.01950 | 0.00440 | 395781 | 7.77E-06 | 4.96E-05 | 19.64 | 0.32 |
| mtDNA-CN | SA | rs147368034 | T | C | 0.02090 | 0.97910 | 0.02960 | 0.00660 | 395781 | 8.03E-06 | 5.08E-05 | 20.11 | 0.92 |
| mtDNA-CN | SA | rs149467613 | A | G | 0.04770 | 0.95230 | -0.02590 | 0.00500 | 395781 | 2.14E-07 | 6.78E-05 | 26.83 | 0.53 |
| mtDNA-CN | SA | rs150397838 | G | A | 0.01790 | 0.98210 | 0.04070 | 0.00880 | 395781 | 3.55E-06 | 5.41E-05 | 21.39 | 0.41 |
| mtDNA-CN | SA | rs151234 | C | G | 0.13720 | 0.86280 | -0.01680 | 0.00310 | 395781 | 1.01E-07 | 7.42E-05 | 29.37 | 0.38 |
| mtDNA-CN | SA | rs156355 | C | T | 0.49600 | 0.50400 | 0.02140 | 0.00220 | 395781 | 6.41E-23 | 2.39E-04 | 94.62 | 0.20 |
| mtDNA-CN | SA | rs1569419 | C | T | 0.75550 | 0.75550 | 0.01890 | 0.00250 | 395781 | 6.87E-14 | 1.44E-04 | 57.15 | 0.43 |
| mtDNA-CN | SA | rs1598010 | A | G | 0.13020 | 0.86980 | 0.01680 | 0.00300 | 395781 | 2.41E-08 | 7.92E-05 | 31.36 | 0.46 |
| mtDNA-CN | SA | rs1613662 | A | G | 0.86640 | 0.86640 | -0.01670 | 0.00280 | 395781 | 3.90E-09 | 8.99E-05 | 35.57 | 0.19 |
| mtDNA-CN | SA | rs164745 | T | C | 0.38270 | 0.61730 | -0.01050 | 0.00230 | 395781 | 4.65E-06 | 5.27E-05 | 20.84 | 0.65 |
| mtDNA-CN | SA | rs17013261 | T | C | 0.08450 | 0.91550 | -0.01790 | 0.00390 | 395781 | 3.56E-06 | 5.32E-05 | 21.07 | 0.02 |
| mtDNA-CN | SA | rs1760940 | C | A | 0.24550 | 0.75450 | 0.02630 | 0.00240 | 395781 | 5.20E-27 | 3.03E-04 | 120.08 | 0.51 |
| mtDNA-CN | SA | rs17850455 | G | C | 0.01550 | 0.98450 | 0.09100 | 0.01040 | 395781 | 1.81E-18 | 1.93E-04 | 76.56 | 0.12 |
| mtDNA-CN | SA | rs181902297 | C | T | 0.01090 | 0.98910 | -0.04790 | 0.01070 | 395781 | 8.07E-06 | 5.06E-05 | 20.04 | 0.39 |
| mtDNA-CN | SA | rs1924633 | C | T | 0.89070 | 0.89070 | 0.01460 | 0.00330 | 395781 | 7.57E-06 | 4.95E-05 | 19.57 | 0.34 |
| mtDNA-CN | SA | rs192890685 | T | C | 0.05570 | 0.94430 | 0.02470 | 0.00440 | 395781 | 1.93E-08 | 7.96E-05 | 31.51 | 0.62 |
| mtDNA-CN | SA | rs193197761 | T | C | 0.01290 | 0.98710 | 0.05880 | 0.01290 | 395781 | 5.36E-06 | 5.25E-05 | 20.78 | 0.38 |
| mtDNA-CN | SA | rs2015599 | A | G | 0.42740 | 0.57260 | 0.01230 | 0.00210 | 395781 | 6.03E-09 | 8.67E-05 | 34.31 | 0.13 |
| mtDNA-CN | SA | rs2038480 | T | A | 0.83200 | 0.83200 | 0.01620 | 0.00270 | 395781 | 1.39E-09 | 9.10E-05 | 36.00 | 0.04 |
| mtDNA-CN | SA | rs2093001 | T | C | 0.86680 | 0.86680 | 0.01490 | 0.00300 | 395781 | 6.18E-07 | 6.23E-05 | 24.67 | 0.10 |
| mtDNA-CN | SA | rs212930 | G | A | 0.77630 | 0.77630 | 0.01490 | 0.00250 | 395781 | 3.18E-09 | 8.98E-05 | 35.52 | 0.12 |
| mtDNA-CN | SA | rs2245946 | A | G | 0.66200 | 0.66200 | 0.03170 | 0.00230 | 395781 | 9.38E-45 | 4.80E-04 | 189.96 | 0.45 |
| mtDNA-CN | SA | rs2263663 | T | C | 0.22960 | 0.77040 | 0.02000 | 0.00240 | 395781 | 1.97E-16 | 1.75E-04 | 69.44 | 0.85 |
| mtDNA-CN | SA | rs2290507 | A | G | 0.12920 | 0.87080 | 0.02230 | 0.00310 | 395781 | 3.64E-13 | 1.31E-04 | 51.75 | 0.02 |
| mtDNA-CN | SA | rs2304693 | A | G | 0.16100 | 0.83900 | 0.01810 | 0.00280 | 395781 | 5.11E-11 | 1.06E-04 | 41.79 | 0.95 |
| mtDNA-CN | SA | rs2307441 | C | T | 0.03780 | 0.96220 | -0.02940 | 0.00550 | 395781 | 1.01E-07 | 7.22E-05 | 28.57 | 0.39 |
| mtDNA-CN | SA | rs2424887 | A | G | 0.95430 | 0.95430 | 0.02600 | 0.00550 | 395781 | 2.32E-06 | 5.65E-05 | 22.35 | 0.87 |
| mtDNA-CN | SA | rs242746 | G | A | 0.37570 | 0.62430 | 0.01000 | 0.00210 | 395781 | 3.49E-06 | 5.73E-05 | 22.68 | 0.50 |
| mtDNA-CN | SA | rs2510044 | A | G | 0.15610 | 0.84390 | -0.01470 | 0.00310 | 395781 | 2.13E-06 | 5.68E-05 | 22.49 | 0.42 |
| mtDNA-CN | SA | rs2792978 | A | G | 0.89360 | 0.89360 | 0.01430 | 0.00320 | 395781 | 8.29E-06 | 5.05E-05 | 19.97 | 0.56 |
| mtDNA-CN | SA | rs289713 | A | T | 0.78430 | 0.78430 | -0.01490 | 0.00270 | 395781 | 4.14E-08 | 7.70E-05 | 30.45 | 0.67 |
| mtDNA-CN | SA | rs2977608 | C | A | 0.77830 | 0.77830 | 0.02360 | 0.00250 | 395781 | 2.58E-21 | 2.25E-04 | 89.11 | 0.03 |
| mtDNA-CN | SA | rs3126066 | G | A | 0.14710 | 0.85290 | -0.01480 | 0.00310 | 395781 | 1.76E-06 | 5.76E-05 | 22.79 | 0.24 |
| mtDNA-CN | SA | rs342293 | G | C | 0.43740 | 0.56260 | 0.02830 | 0.00210 | 395781 | 1.05E-40 | 4.59E-04 | 181.61 | 0.25 |
| mtDNA-CN | SA | rs35202847 | T | C | 0.08550 | 0.91450 | 0.01760 | 0.00360 | 395781 | 8.32E-07 | 6.04E-05 | 23.90 | 0.11 |
| mtDNA-CN | SA | rs35592432 | C | G | 0.01890 | 0.98110 | 0.03140 | 0.00680 | 395781 | 3.83E-06 | 5.39E-05 | 21.32 | 0.01 |
| mtDNA-CN | SA | rs3766744 | A | G | 0.47220 | 0.52780 | -0.01790 | 0.00210 | 395781 | 2.91E-17 | 1.84E-04 | 72.65 | 0.72 |
| mtDNA-CN | SA | rs385893 | C | T | 0.49300 | 0.50700 | 0.01530 | 0.00210 | 395781 | 5.96E-13 | 1.34E-04 | 53.08 | 0.37 |
| mtDNA-CN | SA | rs3907099 | C | T | 0.07650 | 0.92350 | 0.01960 | 0.00430 | 395781 | 4.72E-06 | 5.25E-05 | 20.78 | 0.06 |
| mtDNA-CN | SA | rs3961455 | A | G | 0.28030 | 0.71970 | 0.01420 | 0.00240 | 395781 | 4.31E-09 | 8.85E-05 | 35.01 | 0.27 |
| mtDNA-CN | SA | rs4149525 | C | T | 0.14310 | 0.85690 | -0.01440 | 0.00320 | 395781 | 5.77E-06 | 5.12E-05 | 20.25 | 0.70 |
| mtDNA-CN | SA | rs4284061 | A | T | 0.45730 | 0.54270 | -0.01860 | 0.00220 | 395781 | 2.97E-17 | 1.81E-04 | 71.48 | 0.75 |
| mtDNA-CN | SA | rs445 | T | C | 0.11430 | 0.88570 | 0.02070 | 0.00360 | 395781 | 8.85E-09 | 8.35E-05 | 33.06 | 0.11 |
| mtDNA-CN | SA | rs4502870 | T | C | 0.64810 | 0.64810 | -0.01000 | 0.00220 | 395781 | 6.72E-06 | 5.22E-05 | 20.66 | 0.33 |
| mtDNA-CN | SA | rs4528812 | T | A | 0.59240 | 0.59240 | -0.01120 | 0.00230 | 395781 | 1.07E-06 | 5.99E-05 | 23.71 | 0.94 |
| mtDNA-CN | SA | rs4698839 | T | C | 0.38070 | 0.61930 | 0.01240 | 0.00220 | 395781 | 9.47E-09 | 8.03E-05 | 31.77 | 0.44 |
| mtDNA-CN | SA | rs4725376 | A | G | 0.50200 | 0.50200 | -0.00990 | 0.00210 | 395781 | 3.07E-06 | 5.62E-05 | 22.22 | 0.24 |
| mtDNA-CN | SA | rs4814776 | A | C | 0.34690 | 0.65310 | -0.03000 | 0.00230 | 395781 | 2.00E-40 | 4.30E-04 | 170.13 | 0.91 |
| mtDNA-CN | SA | rs4841132 | G | A | 0.92640 | 0.92640 | -0.02120 | 0.00370 | 395781 | 7.46E-09 | 8.30E-05 | 32.83 | 0.54 |
| mtDNA-CN | SA | rs4854512 | G | A | 0.41250 | 0.58750 | -0.01010 | 0.00210 | 395781 | 2.43E-06 | 5.85E-05 | 23.13 | 0.42 |
| mtDNA-CN | SA | rs4880189 | G | A | 0.72560 | 0.72560 | -0.01060 | 0.00240 | 395781 | 6.10E-06 | 4.93E-05 | 19.51 | 0.06 |
| mtDNA-CN | SA | rs4895441 | G | A | 0.27340 | 0.72660 | 0.01770 | 0.00240 | 395781 | 8.31E-14 | 1.37E-04 | 54.39 | 0.01 |
| mtDNA-CN | SA | rs5012419 | G | A | 0.59150 | 0.59150 | 0.02470 | 0.00220 | 395781 | 2.66E-29 | 3.18E-04 | 126.05 | 0.86 |
| mtDNA-CN | SA | rs56069439 | A | C | 0.26040 | 0.73960 | -0.02740 | 0.00230 | 395781 | 2.30E-32 | 3.59E-04 | 141.92 | 0.15 |
| mtDNA-CN | SA | rs56312911 | A | C | 0.03780 | 0.96220 | -0.02430 | 0.00530 | 395781 | 4.26E-06 | 5.31E-05 | 21.02 | 0.14 |
| mtDNA-CN | SA | rs57251074 | T | C | 0.06860 | 0.93140 | -0.01990 | 0.00440 | 395781 | 4.96E-06 | 5.17E-05 | 20.45 | 0.66 |
| mtDNA-CN | SA | rs5745582 | T | C | 0.22470 | 0.77530 | 0.02100 | 0.00280 | 395781 | 3.46E-14 | 1.42E-04 | 56.25 | 0.35 |
| mtDNA-CN | SA | rs60314390 | G | C | 0.09640 | 0.90360 | 0.01570 | 0.00350 | 395781 | 8.06E-06 | 5.08E-05 | 20.12 | 0.87 |
| mtDNA-CN | SA | rs6105852 | A | G | 0.51790 | 0.51790 | 0.02210 | 0.00210 | 395781 | 1.41E-25 | 2.80E-04 | 110.75 | 0.26 |
| mtDNA-CN | SA | rs61876873 | T | C | 0.19090 | 0.80910 | 0.01380 | 0.00260 | 395781 | 1.84E-07 | 7.12E-05 | 28.17 | 0.24 |
| mtDNA-CN | SA | rs62068782 | T | C | 0.08250 | 0.91750 | -0.01660 | 0.00370 | 395781 | 6.17E-06 | 5.09E-05 | 20.13 | 0.68 |
| mtDNA-CN | SA | rs62165233 | T | A | 0.22660 | 0.77340 | -0.01330 | 0.00280 | 395781 | 1.37E-06 | 5.70E-05 | 22.56 | 0.39 |
| mtDNA-CN | SA | rs62641680 | A | G | 0.02490 | 0.97510 | -0.09030 | 0.00630 | 395781 | 4.63E-47 | 5.19E-04 | 205.44 | 0.97 |
| mtDNA-CN | SA | rs638578 | T | C | 0.82600 | 0.82600 | -0.01530 | 0.00290 | 395781 | 1.44E-07 | 7.03E-05 | 27.83 | 0.71 |
| mtDNA-CN | SA | rs6467255 | G | A | 0.90360 | 0.90360 | 0.01830 | 0.00370 | 395781 | 9.79E-07 | 6.18E-05 | 24.46 | 0.72 |
| mtDNA-CN | SA | rs6511720 | T | G | 0.11030 | 0.88970 | 0.01920 | 0.00330 | 395781 | 4.08E-09 | 8.55E-05 | 33.85 | 0.44 |
| mtDNA-CN | SA | rs6560911 | G | A | 0.27630 | 0.72370 | -0.01080 | 0.00230 | 395781 | 4.29E-06 | 5.57E-05 | 22.05 | 0.03 |
| mtDNA-CN | SA | rs6580981 | A | G | 0.47420 | 0.52580 | 0.01060 | 0.00210 | 395781 | 6.65E-07 | 6.44E-05 | 25.48 | 0.16 |
| mtDNA-CN | SA | rs690347 | G | T | 0.75550 | 0.75550 | -0.01200 | 0.00240 | 395781 | 3.88E-07 | 6.32E-05 | 25.00 | 0.56 |
| mtDNA-CN | SA | rs6959832 | A | G | 0.51390 | 0.51390 | -0.02100 | 0.00210 | 395781 | 2.10E-23 | 2.53E-04 | 100.00 | 0.26 |
| mtDNA-CN | SA | rs701834 | T | C | 0.18390 | 0.81610 | -0.02540 | 0.00260 | 395781 | 1.12E-22 | 2.41E-04 | 95.44 | 0.07 |
| mtDNA-CN | SA | rs71335282 | G | A | 0.20870 | 0.79130 | -0.01440 | 0.00270 | 395781 | 6.73E-08 | 7.19E-05 | 28.44 | 0.70 |
| mtDNA-CN | SA | rs71423358 | A | C | 0.07260 | 0.92740 | -0.01930 | 0.00430 | 395781 | 6.69E-06 | 5.09E-05 | 20.15 | 0.22 |
| mtDNA-CN | SA | rs7213347 | C | G | 0.72070 | 0.72070 | -0.01160 | 0.00230 | 395781 | 4.24E-07 | 6.43E-05 | 25.44 | 0.15 |
| mtDNA-CN | SA | rs72660908 | G | C | 0.38770 | 0.61230 | 0.04570 | 0.00210 | 395781 | 8.25E-101 | 1.20E-03 | 473.58 | 0.08 |
| mtDNA-CN | SA | rs72698722 | T | C | 0.19380 | 0.80620 | -0.01920 | 0.00270 | 395781 | 1.25E-12 | 1.28E-04 | 50.57 | 0.36 |
| mtDNA-CN | SA | rs72712446 | C | T | 0.06360 | 0.93640 | -0.02160 | 0.00470 | 395781 | 5.07E-06 | 5.34E-05 | 21.12 | 0.05 |
| mtDNA-CN | SA | rs72729610 | G | A | 0.13220 | 0.86780 | 0.01360 | 0.00280 | 395781 | 1.53E-06 | 5.96E-05 | 23.59 | 0.93 |
| mtDNA-CN | SA | rs7274977 | G | A | 0.39560 | 0.60440 | 0.01040 | 0.00210 | 395781 | 9.85E-07 | 6.20E-05 | 24.53 | 0.45 |
| mtDNA-CN | SA | rs72794945 | C | A | 0.07260 | 0.92740 | 0.01910 | 0.00400 | 395781 | 2.26E-06 | 5.76E-05 | 22.80 | 0.74 |
| mtDNA-CN | SA | rs74750282 | C | T | 0.06460 | 0.93540 | 0.03800 | 0.00380 | 395781 | 4.29E-24 | 2.53E-04 | 100.00 | 0.08 |
| mtDNA-CN | SA | rs74791819 | G | A | 0.03680 | 0.96320 | -0.02350 | 0.00520 | 395781 | 7.77E-06 | 5.16E-05 | 20.42 | 0.78 |
| mtDNA-CN | SA | rs74869155 | G | A | 0.01190 | 0.98810 | -0.05450 | 0.01140 | 395781 | 1.62E-06 | 5.78E-05 | 22.85 | 0.66 |
| mtDNA-CN | SA | rs74874677 | G | A | 0.02980 | 0.97020 | -0.08190 | 0.00710 | 395781 | 3.62E-31 | 3.36E-04 | 133.06 | 0.03 |
| mtDNA-CN | SA | rs75831460 | A | G | 0.01190 | 0.98810 | 0.04410 | 0.00820 | 395781 | 8.21E-08 | 7.31E-05 | 28.92 | 0.83 |
| mtDNA-CN | SA | rs7705526 | A | C | 0.33700 | 0.66300 | 0.01780 | 0.00230 | 395781 | 6.46E-15 | 1.51E-04 | 59.89 | 0.32 |
| mtDNA-CN | SA | rs7712401 | T | C | 0.57260 | 0.57260 | 0.01020 | 0.00210 | 395781 | 1.54E-06 | 5.96E-05 | 23.59 | 0.42 |
| mtDNA-CN | SA | rs77261872 | T | C | 0.14310 | 0.85690 | 0.02620 | 0.00320 | 395781 | 2.28E-16 | 1.69E-04 | 67.03 | 0.40 |
| mtDNA-CN | SA | rs78909033 | A | G | 0.12330 | 0.87670 | -0.02100 | 0.00310 | 395781 | 1.00E-11 | 1.16E-04 | 45.89 | 0.83 |
| mtDNA-CN | SA | rs7896518 | G | A | 0.43540 | 0.56460 | -0.04560 | 0.00220 | 395781 | 9.53E-99 | 1.08E-03 | 429.62 | 0.72 |
| mtDNA-CN | SA | rs8176645 | A | T | 0.44710 | 0.55290 | -0.01450 | 0.00260 | 395781 | 3.06E-08 | 7.86E-05 | 31.10 | 0.05 |
| mtDNA-CN | SA | rs826404 | C | T | 0.57650 | 0.57650 | -0.00970 | 0.00220 | 395781 | 6.73E-06 | 4.91E-05 | 19.44 | 0.18 |
| mtDNA-CN | SA | rs870021 | A | T | 0.31210 | 0.68790 | -0.01030 | 0.00230 | 395781 | 5.93E-06 | 5.07E-05 | 20.05 | 0.25 |
| mtDNA-CN | SA | rs9425601 | A | G | 0.31710 | 0.68290 | 0.01250 | 0.00230 | 395781 | 3.04E-08 | 7.46E-05 | 29.54 | 0.59 |
| mtDNA-CN | SA | rs9872432 | C | T | 0.34000 | 0.66000 | -0.01110 | 0.00220 | 395781 | 5.18E-07 | 6.43E-05 | 25.46 | 0.39 |
| mtDNA-CN | SA | rs9941212 | A | G | 0.65610 | 0.65610 | 0.01160 | 0.00220 | 395781 | 1.84E-07 | 7.03E-05 | 27.80 | 0.17 |

* Total F_statistic = 56.761

## Table S4. The SNPs selected as IVs of SA.

| Exposure | Outcome | SNP | effect_allele | other_allele | Eaf.  exposure | Maf.  exposure | Beta.  exposure | Se.  exposure | sample size | pval.  exposure | R2 | F statistics | pval.outcome |
| --- | --- | --- | --- | --- | --- | --- | --- | --- | --- | --- | --- | --- | --- |
| SA | mtDNA-CN | rs1001817 | T | C | 0.497513 | 0.502487 | -0.037801 | 0.0072625 | 410385 | 1.94E-07 | 6.60E-05 | 27.09 | 0.4125 |
| SA | mtDNA-CN | rs10082688 | T | C | 0.468412 | 0.531588 | 0.0358854 | 0.0073055 | 410385 | 9.01E-07 | 5.88E-05 | 24.13 | 0.5329 |
| SA | mtDNA-CN | rs10120085 | C | T | 0.371575 | 0.628425 | -0.034871 | 0.0075308 | 410385 | 3.65E-06 | 5.22E-05 | 21.44 | 0.7610 |
| SA | mtDNA-CN | rs10243242 | A | G | 0.0390322 | 0.9609678 | -0.100882 | 0.0191695 | 410385 | 1.42E-07 | 6.75E-05 | 27.70 | 0.9865 |
| SA | mtDNA-CN | rs1032235 | C | T | 0.156844 | 0.843156 | 0.0489828 | 0.0099358 | 410385 | 8.23E-07 | 5.92E-05 | 24.30 | 0.5455 |
| SA | mtDNA-CN | rs10477554 | A | C | 0.283681 | 0.716319 | -0.037181 | 0.0081287 | 410385 | 4.78E-06 | 5.10E-05 | 20.92 | 0.3840 |
| SA | mtDNA-CN | rs10507084 | T | C | 0.179858 | 0.820142 | 0.0567724 | 0.0094358 | 410385 | 1.78E-09 | 8.82E-05 | 36.20 | 0.1508 |
| SA | mtDNA-CN | rs10512823 | C | T | 0.0780463 | 0.9219537 | -0.064778 | 0.013772 | 410385 | 2.56E-06 | 5.39E-05 | 22.12 | 0.4784 |
| SA | mtDNA-CN | rs10733034 | A | G | 0.172164 | 0.827836 | -0.052984 | 0.0097383 | 410385 | 5.31E-08 | 7.21E-05 | 29.60 | 0.8425 |
| SA | mtDNA-CN | rs10777892 | C | A | 0.546418 | 0.546418 | -0.032565 | 0.0073128 | 410385 | 8.46E-06 | 4.83E-05 | 19.83 | 0.1710 |
| SA | mtDNA-CN | rs10860169 | G | A | 0.290045 | 0.709955 | -0.038348 | 0.0080647 | 410385 | 1.98E-06 | 5.51E-05 | 22.61 | 0.3136 |
| SA | mtDNA-CN | rs10894422 | T | G | 0.538217 | 0.538217 | 0.0327036 | 0.0072924 | 410385 | 7.30E-06 | 4.90E-05 | 20.11 | 0.9808 |
| SA | mtDNA-CN | rs10986727 | G | A | 0.618738 | 0.618738 | -0.045352 | 0.0074623 | 410385 | 1.22E-09 | 9.00E-05 | 36.94 | 0.0665 |
| SA | mtDNA-CN | rs1101329 | T | C | 0.42526 | 0.57474 | -0.034589 | 0.0073649 | 410385 | 2.65E-06 | 5.37E-05 | 22.06 | 0.4809 |
| SA | mtDNA-CN | rs11024007 | T | A | 0.133358 | 0.866642 | 0.0566849 | 0.0105934 | 410385 | 8.75E-08 | 6.98E-05 | 28.63 | 0.0792 |
| SA | mtDNA-CN | rs1228509 | C | A | 0.656497 | 0.343503 | 0.0436404 | 0.00767691 | 410385 | 1.31E-08 | 7.87E-05 | 32.31 | 0.1440 |
| SA | mtDNA-CN | rs11075985 | A | C | 0.428773 | 0.571227 | 0.0835051 | 0.0073083 | 410385 | 3.10E-30 | 0.000318 | 130.55 | 0.5309 |
| SA | mtDNA-CN | rs111617153 | T | C | 0.103443 | 0.896557 | -0.054447 | 0.0120925 | 410385 | 6.72E-06 | 4.94E-05 | 20.27 | 0.8926 |
| SA | mtDNA-CN | rs11241689 | T | C | 0.439518 | 0.560482 | -0.038307 | 0.0073267 | 410385 | 1.71E-07 | 6.66E-05 | 27.34 | 0.0517 |
| SA | mtDNA-CN | rs113955098 | A | G | 0.0678894 | 0.9321106 | -0.083286 | 0.0148862 | 410385 | 2.21E-08 | 7.63E-05 | 31.30 | 0.2242 |
| SA | mtDNA-CN | rs114106239 | T | C | 0.0371451 | 0.9628549 | -0.111631 | 0.0199322 | 410385 | 2.14E-08 | 7.64E-05 | 31.37 | 0.9426 |
| SA | mtDNA-CN | rs114812454 | A | G | 0.0172395 | 0.9827605 | 0.127162 | 0.0272467 | 410385 | 3.06E-06 | 5.31E-05 | 21.78 | 0.2310 |
| SA | mtDNA-CN | rs115706648 | C | T | 0.0011484 | 0.9988516 | 0.430686 | 0.0971416 | 410385 | 9.27E-06 | 4.79E-05 | 19.66 | 0.4292 |
| SA | mtDNA-CN | rs1163248 | G | A | 0.699785 | 0.699785 | 0.0373499 | 0.007969 | 410385 | 2.77E-06 | 5.35E-05 | 21.97 | 0.3630 |
| SA | mtDNA-CN | rs11697584 | T | A | 0.247488 | 0.752512 | -0.038784 | 0.0084845 | 410385 | 4.85E-06 | 5.09E-05 | 20.90 | 0.9412 |
| SA | mtDNA-CN | rs11712107 | T | C | 0.558867 | 0.558867 | 0.035392 | 0.0073211 | 410385 | 1.34E-06 | 5.69E-05 | 23.37 | 0.9905 |
| SA | mtDNA-CN | rs117130359 | A | G | 0.0345674 | 0.9654326 | -0.090847 | 0.0203104 | 410385 | 7.72E-06 | 4.87E-05 | 20.01 | 0.9733 |
| SA | mtDNA-CN | rs117147102 | A | G | 0.0216395 | 0.9783605 | 0.115564 | 0.024324 | 410385 | 2.02E-06 | 5.50E-05 | 22.57 | 0.0235 |
| SA | mtDNA-CN | rs117228173 | C | T | 0.0535556 | 0.9464444 | -0.083814 | 0.0164503 | 410385 | 3.49E-07 | 6.33E-05 | 25.96 | 0.5236 |
| SA | mtDNA-CN | rs117287568 | C | A | 0.037631 | 0.962369 | -0.089482 | 0.0195347 | 410385 | 4.63E-06 | 5.11E-05 | 20.98 | 0.3472 |
| SA | mtDNA-CN | rs117394950 | G | A | 0.0368073 | 0.9631927 | -0.100546 | 0.0199548 | 410385 | 4.69E-07 | 6.19E-05 | 25.39 | 0.0859 |
| SA | mtDNA-CN | rs117528263 | A | G | 0.000865 | 0.999135 | 0.517894 | 0.115263 | 410385 | 7.02E-06 | 4.92E-05 | 20.19 | 0.9531 |
| SA | mtDNA-CN | rs118009414 | C | T | 0.0195011 | 0.9804989 | 0.132772 | 0.0257568 | 410385 | 2.54E-07 | 6.47E-05 | 26.57 | 0.0343 |
| SA | mtDNA-CN | rs11863963 | C | G | 0.379218 | 0.620782 | 0.0349175 | 0.0074884 | 410385 | 3.12E-06 | 5.30E-05 | 21.74 | 0.0450 |
| SA | mtDNA-CN | rs11981973 | G | A | 0.181693 | 0.818307 | 0.0562613 | 0.0093235 | 410385 | 1.60E-09 | 8.87E-05 | 36.41 | 0.9345 |
| SA | mtDNA-CN | rs12167677 | G | C | 0.390834 | 0.609166 | -0.041001 | 0.0074782 | 410385 | 4.19E-08 | 7.32E-05 | 30.06 | 0.3674 |
| SA | mtDNA-CN | rs12189191 | T | C | 0.36716 | 0.63284 | -0.033499 | 0.0075667 | 410385 | 9.55E-06 | 4.78E-05 | 19.60 | 0.4477 |
| SA | mtDNA-CN | rs12461314 | C | A | 0.0983382 | 0.9016618 | -0.062359 | 0.0123588 | 410385 | 4.52E-07 | 6.20E-05 | 25.46 | 0.0699 |
| SA | mtDNA-CN | rs12493320 | G | C | 0.0856647 | 0.9143353 | -0.068055 | 0.013166 | 410385 | 2.35E-07 | 6.51E-05 | 26.72 | 0.0903 |
| SA | mtDNA-CN | rs12576197 | T | C | 0.418582 | 0.581418 | 0.0337409 | 0.0073999 | 410385 | 5.12E-06 | 5.07E-05 | 20.79 | 0.3126 |
| SA | mtDNA-CN | rs1275922 | G | A | 0.639658 | 0.639658 | -0.040724 | 0.0076227 | 410385 | 9.17E-08 | 6.95E-05 | 28.54 | 0.9654 |
| SA | mtDNA-CN | rs12924412 | C | T | 0.142185 | 0.857815 | 0.0541028 | 0.0103076 | 410385 | 1.53E-07 | 6.71E-05 | 27.55 | 0.6343 |
| SA | mtDNA-CN | rs13188941 | C | G | 0.490289 | 0.509711 | -0.03243 | 0.0072768 | 410385 | 8.33E-06 | 4.84E-05 | 19.86 | 0.1520 |
| SA | mtDNA-CN | rs13333522 | G | C | 0.526937 | 0.526937 | 0.0383698 | 0.0072998 | 410385 | 1.47E-07 | 6.73E-05 | 27.63 | 0.3266 |
| SA | mtDNA-CN | rs1359200 | G | A | 0.479575 | 0.520425 | -0.032984 | 0.0072888 | 410385 | 6.03E-06 | 4.99E-05 | 20.48 | 0.6090 |
| SA | mtDNA-CN | rs139879148 | C | G | 0.0023335 | 0.9976665 | 0.359113 | 0.0702916 | 410385 | 3.24E-07 | 6.36E-05 | 26.10 | 0.4722 |
| SA | mtDNA-CN | rs140929616 | C | T | 0.0228876 | 0.9771124 | 0.11653 | 0.0237238 | 410385 | 9.02E-07 | 5.88E-05 | 24.13 | 0.6749 |
| SA | mtDNA-CN | rs141609414 | C | T | 0.0037405 | 0.9962595 | 0.254761 | 0.0567558 | 410385 | 7.17E-06 | 4.91E-05 | 20.15 | 0.6945 |
| SA | mtDNA-CN | rs143490656 | C | A | 0.0464214 | 0.9535786 | -0.100661 | 0.0177573 | 410385 | 1.44E-08 | 7.83E-05 | 32.13 | 0.6643 |
| SA | mtDNA-CN | rs145400253 | T | C | 0.0098413 | 0.9901587 | -0.171189 | 0.0385555 | 410385 | 8.99E-06 | 4.80E-05 | 19.71 | 0.8557 |
| SA | mtDNA-CN | rs150528421 | G | A | 0.0343327 | 0.9656673 | 0.0971466 | 0.0195771 | 410385 | 6.97E-07 | 6.00E-05 | 24.62 | 0.4626 |
| SA | mtDNA-CN | rs1514985 | A | G | 0.475009 | 0.524991 | 0.0351782 | 0.0072729 | 410385 | 1.32E-06 | 5.70E-05 | 23.40 | 0.7464 |
| SA | mtDNA-CN | rs1634417 | C | A | 0.31808 | 0.68192 | -0.035831 | 0.008056 | 410385 | 8.68E-06 | 4.82E-05 | 19.78 | 0.2744 |
| SA | mtDNA-CN | rs1693919 | G | A | 0.517488 | 0.517488 | -0.03253 | 0.0072681 | 410385 | 7.61E-06 | 4.88E-05 | 20.03 | 0.1873 |
| SA | mtDNA-CN | rs17045199 | A | G | 0.393695 | 0.606305 | -0.038783 | 0.0074597 | 410385 | 2.00E-07 | 6.59E-05 | 27.03 | 0.2850 |
| SA | mtDNA-CN | rs17241375 | G | T | 0.0762037 | 0.9237963 | 0.0717614 | 0.0135358 | 410385 | 1.15E-07 | 6.85E-05 | 28.11 | 0.6553 |
| SA | mtDNA-CN | rs17438786 | C | G | 0.037907 | 0.962093 | 0.0922021 | 0.018745 | 410385 | 8.71E-07 | 5.90E-05 | 24.19 | 0.7279 |
| SA | mtDNA-CN | rs17452755 | G | A | 0.0924994 | 0.9075006 | 0.0577981 | 0.0124585 | 410385 | 3.50E-06 | 5.24E-05 | 21.52 | 0.7041 |
| SA | mtDNA-CN | rs17616971 | A | G | 0.564997 | 0.564997 | 0.0346582 | 0.0073393 | 410385 | 2.33E-06 | 5.43E-05 | 22.30 | 0.4684 |
| SA | mtDNA-CN | rs17709614 | C | T | 0.568647 | 0.568647 | 0.0348417 | 0.0073638 | 410385 | 2.23E-06 | 5.45E-05 | 22.39 | 0.6522 |
| SA | mtDNA-CN | rs1800437 | C | G | 0.258304 | 0.741696 | -0.053273 | 0.0083581 | 410385 | 1.84E-10 | 9.90E-05 | 40.63 | 0.0510 |
| SA | mtDNA-CN | rs1818163 | G | A | 0.40325 | 0.59675 | 0.038783 | 0.0073837 | 410385 | 1.50E-07 | 6.72E-05 | 27.59 | 0.7458 |
| SA | mtDNA-CN | rs1885767 | G | A | 0.593731 | 0.593731 | -0.043061 | 0.0073876 | 410385 | 5.58E-09 | 8.28E-05 | 33.98 | 0.9152 |
| SA | mtDNA-CN | rs200370809 | G | C | 0.497732 | 0.502268 | -0.046033 | 0.0072859 | 410385 | 2.65E-10 | 9.73E-05 | 39.92 | 0.5999 |
| SA | mtDNA-CN | rs2170710 | C | T | 0.0766016 | 0.9233984 | 0.0684491 | 0.0134896 | 410385 | 3.89E-07 | 6.27E-05 | 25.75 | 0.1350 |
| SA | mtDNA-CN | rs2181938 | T | C | 0.790719 | 0.790719 | -0.040801 | 0.0088946 | 410385 | 4.49E-06 | 5.13E-05 | 21.04 | 0.9808 |
| SA | mtDNA-CN | rs2296327 | T | C | 0.292238 | 0.707762 | 0.0367713 | 0.0079975 | 410385 | 4.27E-06 | 5.15E-05 | 21.14 | 0.5373 |
| SA | mtDNA-CN | rs2370982 | T | C | 0.238135 | 0.761865 | 0.0453218 | 0.0084624 | 410385 | 8.52E-08 | 6.99E-05 | 28.68 | 0.4559 |
| SA | mtDNA-CN | rs2398855 | A | C | 0.556059 | 0.556059 | -0.03762 | 0.007314 | 410385 | 2.69E-07 | 6.45E-05 | 26.46 | 0.6368 |
| SA | mtDNA-CN | rs2469875 | G | A | 0.466765 | 0.533235 | 0.0353971 | 0.0072845 | 410385 | 1.18E-06 | 5.75E-05 | 23.61 | 0.2214 |
| SA | mtDNA-CN | rs2532848 | T | G | 0.169764 | 0.830236 | -0.046166 | 0.0097736 | 410385 | 2.32E-06 | 5.44E-05 | 22.31 | 0.0691 |
| SA | mtDNA-CN | rs258547 | G | A | 0.48239 | 0.51761 | -0.03428 | 0.0072711 | 410385 | 2.42E-06 | 5.42E-05 | 22.23 | 0.7388 |
| SA | mtDNA-CN | rs2607988 | A | G | 0.691504 | 0.691504 | -0.039914 | 0.0078488 | 410385 | 3.67E-07 | 6.30E-05 | 25.86 | 0.6306 |
| SA | mtDNA-CN | rs2703307 | C | T | 0.613724 | 0.613724 | -0.033651 | 0.0074713 | 410385 | 6.67E-06 | 4.94E-05 | 20.29 | 0.9891 |
| SA | mtDNA-CN | rs2715945 | A | G | 0.796402 | 0.796402 | 0.0425156 | 0.0090913 | 410385 | 2.92E-06 | 5.33E-05 | 21.87 | 0.0176 |
| SA | mtDNA-CN | rs2790570 | G | A | 0.579785 | 0.579785 | -0.033727 | 0.0073601 | 410385 | 4.60E-06 | 5.12E-05 | 21.00 | 0.3393 |
| SA | mtDNA-CN | rs2872889 | T | G | 0.182401 | 0.817599 | 0.0428524 | 0.0093454 | 410385 | 4.53E-06 | 5.12E-05 | 21.03 | 0.2045 |
| SA | mtDNA-CN | rs28815269 | A | G | 0.616267 | 0.616267 | 0.045323 | 0.0075282 | 410385 | 1.74E-09 | 8.83E-05 | 36.25 | 0.0474 |
| SA | mtDNA-CN | rs2904804 | T | G | 0.755535 | 0.755535 | -0.039891 | 0.0084653 | 410385 | 2.45E-06 | 5.41E-05 | 22.21 | 0.6597 |
| SA | mtDNA-CN | rs35322093 | G | A | 0.309899 | 0.690101 | 0.0377485 | 0.0078527 | 410385 | 1.53E-06 | 5.63E-05 | 23.11 | 0.6057 |
| SA | mtDNA-CN | rs3733344 | G | T | 0.477498 | 0.522502 | -0.034108 | 0.0073029 | 410385 | 3.00E-06 | 5.32E-05 | 21.81 | 0.6543 |
| SA | mtDNA-CN | rs3845359 | T | C | 0.55972 | 0.55972 | -0.035932 | 0.0073248 | 410385 | 9.32E-07 | 5.86E-05 | 24.06 | 0.7153 |
| SA | mtDNA-CN | rs4416738 | G | C | 0.418268 | 0.581732 | -0.035399 | 0.0074216 | 410385 | 1.84E-06 | 5.54E-05 | 22.75 | 0.1958 |
| SA | mtDNA-CN | rs4432271 | T | C | 0.799174 | 0.799174 | 0.0407808 | 0.0091286 | 410385 | 7.92E-06 | 4.86E-05 | 19.96 | 0.9643 |
| SA | mtDNA-CN | rs45551238 | T | C | 0.0492676 | 0.9507324 | -0.112508 | 0.0174442 | 410385 | 1.12E-10 | 0.0001014 | 41.60 | 0.2837 |
| SA | mtDNA-CN | rs4594227 | G | A | 0.417291 | 0.582709 | 0.0348539 | 0.007366 | 410385 | 2.23E-06 | 5.46E-05 | 22.39 | 0.5557 |
| SA | mtDNA-CN | rs4641453 | G | A | 0.590133 | 0.590133 | -0.039457 | 0.0073713 | 410385 | 8.66E-08 | 6.98E-05 | 28.65 | 0.5021 |
| SA | mtDNA-CN | rs4794016 | A | T | 0.525319 | 0.525319 | 0.0406388 | 0.0072786 | 410385 | 2.36E-08 | 7.60E-05 | 31.17 | 0.9153 |
| SA | mtDNA-CN | rs4805417 | G | A | 0.80706 | 0.80706 | -0.042436 | 0.0091756 | 410385 | 3.75E-06 | 5.21E-05 | 21.39 | 0.5432 |
| SA | mtDNA-CN | rs4832930 | A | G | 0.877584 | 0.877584 | 0.0521794 | 0.0112 | 410385 | 3.18E-06 | 5.29E-05 | 21.71 | 0.7767 |
| SA | mtDNA-CN | rs4925351 | G | C | 0.185624 | 0.814376 | 0.0441268 | 0.0094306 | 410385 | 2.88E-06 | 5.33E-05 | 21.89 | 0.0315 |
| SA | mtDNA-CN | rs4970831 | T | C | 0.234622 | 0.765378 | 0.0399007 | 0.0085331 | 410385 | 2.93E-06 | 5.33E-05 | 21.86 | 0.6370 |
| SA | mtDNA-CN | rs4987845 | T | C | 0.0494496 | 0.9505504 | -0.08842 | 0.01725 | 410385 | 2.96E-07 | 6.40E-05 | 26.27 | 0.2262 |
| SA | mtDNA-CN | rs521604 | A | G | 0.0683289 | 0.9316711 | 0.0663112 | 0.0142321 | 410385 | 3.17E-06 | 5.29E-05 | 21.71 | 0.8114 |
| SA | mtDNA-CN | rs55724912 | A | G | 0.376128 | 0.623872 | 0.0336648 | 0.0075223 | 410385 | 7.63E-06 | 4.88E-05 | 20.03 | 0.9222 |
| SA | mtDNA-CN | rs557359 | G | A | 0.746656 | 0.746656 | 0.0471574 | 0.0084259 | 410385 | 2.18E-08 | 7.63E-05 | 31.32 | 0.7034 |
| SA | mtDNA-CN | rs55767867 | A | G | 0.0054856 | 0.9945144 | 0.213093 | 0.0470452 | 410385 | 5.91E-06 | 5.00E-05 | 20.52 | 0.7358 |
| SA | mtDNA-CN | rs56137106 | A | G | 0.0212426 | 0.9787574 | -0.123255 | 0.0262461 | 410385 | 2.65E-06 | 5.37E-05 | 22.05 | 0.3865 |
| SA | mtDNA-CN | rs56138333 | A | G | 0.0691969 | 0.9308031 | -0.071272 | 0.0145943 | 410385 | 1.04E-06 | 5.81E-05 | 23.85 | 0.2414 |
| SA | mtDNA-CN | rs56812253 | C | T | 0.227268 | 0.772732 | -0.045249 | 0.0088033 | 410385 | 2.75E-07 | 6.44E-05 | 26.42 | 0.1443 |
| SA | mtDNA-CN | rs59333125 | C | A | 0.0810173 | 0.9189827 | -0.076369 | 0.0135482 | 410385 | 1.73E-08 | 7.74E-05 | 31.77 | 0.2123 |
| SA | mtDNA-CN | rs60700772 | C | T | 0.22103 | 0.77897 | 0.0472237 | 0.0087501 | 410385 | 6.78E-08 | 7.10E-05 | 29.13 | 0.8258 |
| SA | mtDNA-CN | rs61844020 | T | C | 0.0678437 | 0.9321563 | -0.06955 | 0.0147161 | 410385 | 2.29E-06 | 5.44E-05 | 22.34 | 0.1496 |
| SA | mtDNA-CN | rs61873510 | T | G | 0.301164 | 0.698836 | 0.0480822 | 0.0079467 | 410385 | 1.44E-09 | 8.92E-05 | 36.61 | 0.3687 |
| SA | mtDNA-CN | rs62076789 | A | G | 0.0189843 | 0.9810157 | -0.124288 | 0.0273929 | 410385 | 5.70E-06 | 5.02E-05 | 20.59 | 0.7311 |
| SA | mtDNA-CN | rs62313026 | C | T | 0.283565 | 0.716435 | 0.0406636 | 0.0080501 | 410385 | 4.39E-07 | 6.22E-05 | 25.52 | 0.0790 |
| SA | mtDNA-CN | rs6684889 | A | T | 0.643544 | 0.643544 | 0.0358684 | 0.0076206 | 410385 | 2.52E-06 | 5.40E-05 | 22.15 | 0.2375 |
| SA | mtDNA-CN | rs6955671 | T | C | 0.627912 | 0.627912 | -0.043113 | 0.0075109 | 410385 | 9.46E-09 | 8.03E-05 | 32.95 | 0.2688 |
| SA | mtDNA-CN | rs6983338 | C | T | 0.544918 | 0.544918 | 0.0325457 | 0.0073097 | 410385 | 8.49E-06 | 4.83E-05 | 19.82 | 0.5329 |
| SA | mtDNA-CN | rs7113478 | A | G | 0.337478 | 0.662522 | 0.0349893 | 0.0076848 | 410385 | 5.29E-06 | 5.05E-05 | 20.73 | 0.0658 |
| SA | mtDNA-CN | rs72719400 | G | A | 0.0350419 | 0.9649581 | -0.09323 | 0.0201963 | 410385 | 3.91E-06 | 5.19E-05 | 21.31 | 0.7940 |
| SA | mtDNA-CN | rs72732695 | T | C | 0.0283888 | 0.9716112 | 0.113455 | 0.021275 | 410385 | 9.67E-08 | 6.93E-05 | 28.44 | 0.2519 |
| SA | mtDNA-CN | rs72817589 | T | C | 0.0188168 | 0.9811832 | -0.13031 | 0.0276705 | 410385 | 2.48E-06 | 5.40E-05 | 22.18 | 0.8142 |
| SA | mtDNA-CN | rs72981098 | G | A | 0.138019 | 0.861981 | 0.0521793 | 0.0105302 | 410385 | 7.23E-07 | 5.98E-05 | 24.55 | 0.7024 |
| SA | mtDNA-CN | rs743507 | T | C | 0.838491 | 0.838491 | -0.047909 | 0.0098283 | 410385 | 1.09E-06 | 5.79E-05 | 23.76 | 0.7209 |
| SA | mtDNA-CN | rs7523192 | C | T | 0.171002 | 0.828998 | 0.0429144 | 0.0095779 | 410385 | 7.44E-06 | 4.89E-05 | 20.08 | 0.1700 |
| SA | mtDNA-CN | rs7564231 | G | A | 0.880084 | 0.880084 | 0.0569236 | 0.0113713 | 410385 | 5.56E-07 | 6.11E-05 | 25.06 | 0.5093 |
| SA | mtDNA-CN | rs76229479 | C | A | 0.0986752 | 0.9013248 | -0.067957 | 0.0123803 | 410385 | 4.04E-08 | 7.34E-05 | 30.13 | 0.0297 |
| SA | mtDNA-CN | rs7674262 | A | T | 0.0271502 | 0.9728498 | 0.0974102 | 0.0220136 | 410385 | 9.64E-06 | 4.77E-05 | 19.58 | 0.3565 |
| SA | mtDNA-CN | rs7683676 | G | C | 0.690966 | 0.690966 | -0.043115 | 0.0078621 | 410385 | 4.16E-08 | 7.33E-05 | 30.07 | 0.4337 |
| SA | mtDNA-CN | rs77144578 | A | G | 0.102268 | 0.897732 | -0.056846 | 0.0121087 | 410385 | 2.67E-06 | 5.37E-05 | 22.04 | 0.6404 |
| SA | mtDNA-CN | rs7750662 | A | G | 0.84014 | 0.84014 | -0.053898 | 0.0099032 | 410385 | 5.25E-08 | 7.22E-05 | 29.62 | 0.3084 |
| SA | mtDNA-CN | rs77958544 | C | T | 0.0294013 | 0.9705987 | 0.0938549 | 0.0212251 | 410385 | 9.78E-06 | 4.76E-05 | 19.55 | 0.4451 |
| SA | mtDNA-CN | rs78189434 | G | C | 0.101292 | 0.898708 | 0.0575606 | 0.0118986 | 410385 | 1.31E-06 | 5.70E-05 | 23.40 | 0.3183 |
| SA | mtDNA-CN | rs78270246 | T | A | 0.0779212 | 0.9220788 | 0.0633868 | 0.013524 | 410385 | 2.77E-06 | 5.35E-05 | 21.97 | 0.0244 |
| SA | mtDNA-CN | rs78549563 | A | G | 0.136717 | 0.863283 | -0.049819 | 0.010704 | 410385 | 3.25E-06 | 5.28E-05 | 21.66 | 0.1442 |
| SA | mtDNA-CN | rs78646618 | T | A | 0.112243 | 0.887757 | 0.0515976 | 0.0115439 | 410385 | 7.83E-06 | 4.87E-05 | 19.98 | 0.2855 |
| SA | mtDNA-CN | rs79559022 | T | G | 0.0520104 | 0.9479896 | 0.0785054 | 0.0160837 | 410385 | 1.06E-06 | 5.81E-05 | 23.82 | 0.0148 |
| SA | mtDNA-CN | rs79677549 | A | G | 0.108435 | 0.891565 | 0.057696 | 0.0115709 | 410385 | 6.16E-07 | 6.06E-05 | 24.86 | 0.7501 |
| SA | mtDNA-CN | rs79897997 | C | A | 0.0051317 | 0.9948683 | -0.252651 | 0.0555592 | 410385 | 5.43E-06 | 5.04E-05 | 20.68 | 0.4306 |
| SA | mtDNA-CN | rs8025493 | A | G | 0.559975 | 0.559975 | -0.036723 | 0.0073199 | 410385 | 5.25E-07 | 6.13E-05 | 25.17 | 0.6229 |
| SA | mtDNA-CN | rs809034 | C | T | 0.600423 | 0.600423 | 0.0405391 | 0.007449 | 410385 | 5.26E-08 | 7.22E-05 | 29.62 | 0.4159 |
| SA | mtDNA-CN | rs834774 | G | T | 0.125539 | 0.874461 | 0.0494553 | 0.0108517 | 410385 | 5.18E-06 | 5.06E-05 | 20.77 | 0.7865 |
| SA | mtDNA-CN | rs861050 | T | C | 0.448885 | 0.551115 | 0.0326815 | 0.0073173 | 410385 | 7.96E-06 | 4.86E-05 | 19.95 | 0.3796 |
| SA | mtDNA-CN | rs9379084 | A | G | 0.113687 | 0.886313 | -0.055024 | 0.0116572 | 410385 | 2.36E-06 | 5.43E-05 | 22.28 | 0.1085 |
| SA | mtDNA-CN | rs9399146 | T | C | 0.948611 | 0.948611 | 0.0784759 | 0.016726 | 410385 | 2.71E-06 | 5.36E-05 | 22.01 | 0.9582 |
| SA | mtDNA-CN | rs9454417 | A | G | 0.0193306 | 0.9806694 | 0.114421 | 0.0258143 | 410385 | 9.32E-06 | 4.79E-05 | 19.65 | 0.6143 |
| SA | mtDNA-CN | rs967524 | C | T | 0.0477803 | 0.9522197 | 0.074457 | 0.0167881 | 410385 | 9.20E-06 | 4.79E-05 | 19.67 | 0.6273 |
| SA | mtDNA-CN | rs9693229 | G | A | 0.188911 | 0.811089 | 0.045924 | 0.0092071 | 410385 | 6.11E-07 | 6.06E-05 | 24.88 | 0.9259 |
| SA | mtDNA-CN | rs9889775 | T | G | 0.125917 | 0.874083 | 0.0487563 | 0.0109406 | 410385 | 8.33E-06 | 4.84E-05 | 19.86 | 0.2642 |

* Total F_statistic = 25.6483

## Table S5. Recalculation of the forward causal relationship between mtDNA-CN and SA after excluding SNPs with F-statistics close to 10 (between 10-20).

| Remove_SNP | effect_allele | other_allele | beta.exposure | se.exposure | pval.exposure | beta.outcome | eaf.outcome | pval.outcome | se.outcome | samplesize.exposure | R2 | F |
| --- | --- | --- | --- | --- | --- | --- | --- | --- | --- | --- | --- | --- |
| rs10455872 | G | A | -0.0174 | 0.0039 | 7.57E-06 | 0.00562313 | 0.0461933 | 0.745665 | 0.017336 | 395718 | 5.03E-05 | 19.90522484 |
| rs111606268 | C | T | -0.0276 | 0.0062 | 7.70E-06 | -0.00444445 | 0.0178761 | 0.872034 | 0.0275923 | 395718 | 5.01E-05 | 19.81675728 |
| rs112254829 | T | C | -0.0349 | 0.0079 | 9.84E-06 | 0.00577598 | 0.0133074 | 0.855655 | 0.0317523 | 395718 | 4.93E-05 | 19.51616478 |
| rs113089931 | A | G | -0.0119 | 0.0027 | 9.02E-06 | 0.00513489 | 0.216023 | 0.567879 | 0.00899001 | 395718 | 4.91E-05 | 19.42514188 |
| rs144344009 | C | T | 0.0195 | 0.0044 | 7.77E-06 | 0.0172734 | 0.0467406 | 0.32056 | 0.0173898 | 395718 | 4.96E-05 | 19.64091313 |
| rs1924633 | C | T | 0.0146 | 0.0033 | 7.57E-06 | 0.0122314 | 0.911571 | 0.33991 | 0.0128165 | 395718 | 4.95E-05 | 19.5738221 |
| rs2792978 | A | G | 0.0143 | 0.0032 | 8.29E-06 | 0.00660391 | 0.886006 | 0.563402 | 0.0114295 | 395718 | 5.05E-05 | 19.96962563 |
| rs4880189 | G | A | -0.0106 | 0.0024 | 6.10E-06 | 0.0149719 | 0.703297 | 0.0604784 | 0.00797529 | 395718 | 4.93E-05 | 19.50684585 |
| rs826404 | C | T | -0.0097 | 0.0022 | 6.73E-06 | 0.0100589 | 0.621017 | 0.180394 | 0.00750917 | 395718 | 4.91E-05 | 19.43998439 |

(1) MR analysis:

- MR Egger: *P* = 0.0384; OR = 0.8170; 95% CI [0.6762, 0.9872]
- Weighted median: *P* = 0.1311; OR = 0.8995; 95% CI [0.7839, 1.0321]
- Inverse variance weighted: *P* = 0.0008; OR = 0.8602; 95% CI [0.7876, 0.9395]
- Simple mode: *P* = 0.0929; OR = 0.7544; 95% CI [0.5444, 1.0453]
- Weighted mode: *P* = 0.3696; OR = 0.9060; 95% CI [0.7308, 1.1232]

(2) Sensitivity analysis:

- Heterogeneity test statistic (Cochran's Q) = 146.2196 on 122 degrees of freedom, (p-value = 0.0668). I^2 = 16.6%
- Egger_intercept = 0.00122399634778884; *P* = 0.547451250287648
- MR-PRESSO: `Global Test`$RSSobs = 148.9105; `Global Test`$*P*value = 0.067

## Table S6. Recalculation of the reverse causal relationship between mtDNA-CN and SA after excluding SNPs with F-statistics close to 10 (between 10-20).

| Remove_SNP | effect_allele.exposure | other_allele.exposure | beta.exposure | se.exposure | pval.exposure | beta.outcome | eaf.exposure | se.outcome | pval.outcome | sample size | R2 | F |
| --- | --- | --- | --- | --- | --- | --- | --- | --- | --- | --- | --- | --- |
| rs10777892 | C | A | -0.032565 | 0.007313 | 8.46E-06 | -0.0029 | 0.5464 | 0.0021 | 0.1710 | 410385 | 4.83E-05 | 19.83034551 |
| rs115706648 | C | T | 0.430686 | 0.097142 | 9.27E-06 | 0.0106 | 0.0011 | 0.0134 | 0.4292 | 410385 | 4.79E-05 | 19.65662209 |
| rs12189191 | T | C | -0.033499 | 0.007567 | 9.55E-06 | -0.0017 | 0.3672 | 0.0022 | 0.4477 | 410385 | 4.78E-05 | 19.59995925 |
| rs13188941 | C | G | -0.032430 | 0.007277 | 8.33E-06 | -0.0031 | 0.4903 | 0.0022 | 0.1520 | 410385 | 4.84E-05 | 19.86162489 |
| rs145400253 | T | C | -0.171189 | 0.038556 | 8.99E-06 | -0.0085 | 0.0098 | 0.0466 | 0.8557 | 410385 | 4.80E-05 | 19.71409815 |
| rs1634417 | C | A | -0.035831 | 0.008056 | 8.68E-06 | 0.0029 | 0.3181 | 0.0027 | 0.2744 | 410385 | 4.82E-05 | 19.78171293 |
| rs4432271 | T | C | 0.040781 | 0.009129 | 7.92E-06 | 0.0001 | 0.7992 | 0.0032 | 0.9643 | 410385 | 4.86E-05 | 19.95726439 |
| rs6983338 | C | T | 0.032546 | 0.007310 | 8.49E-06 | -0.0013 | 0.5449 | 0.0022 | 0.5329 | 410385 | 4.83E-05 | 19.82375906 |
| rs7674262 | A | T | 0.097410 | 0.022014 | 9.64E-06 | 0.0061 | 0.0272 | 0.0066 | 0.3565 | 410385 | 4.77E-05 | 19.58053761 |
| rs77958544 | C | T | 0.093855 | 0.021225 | 9.78E-06 | 0.0043 | 0.0294 | 0.0056 | 0.4451 | 410385 | 4.76E-05 | 19.55295028 |
| rs78646618 | T | A | 0.051598 | 0.011544 | 7.83E-06 | 0.0035 | 0.1122 | 0.0033 | 0.2855 | 410385 | 4.87E-05 | 19.97798921 |
| rs861050 | T | C | 0.032682 | 0.007317 | 7.96E-06 | 0.0019 | 0.4489 | 0.0022 | 0.3796 | 410385 | 4.86E-05 | 19.94787156 |
| rs9454417 | A | G | 0.114421 | 0.025814 | 9.32E-06 | 0.0026 | 0.0193 | 0.0052 | 0.6143 | 410385 | 4.79E-05 | 19.64665667 |
| rs967524 | C | T | 0.074457 | 0.016788 | 9.20E-06 | -0.0021 | 0.0478 | 0.0043 | 0.6273 | 410385 | 4.79E-05 | 19.67006776 |
| rs9889775 | T | G | 0.048756 | 0.010941 | 8.33E-06 | 0.0030 | 0.1259 | 0.0027 | 0.2642 | 410385 | 4.84E-05 | 19.85990125 |

1. MR analysis:

- MR Egger: *P* = 0.717576338; OR = 0.996051125; 95% CI [0.974970365, 1.017587692]
- Weighted median: *P* = 0.936033474; OR = 1.000666607; 95% CI [0.984513246, 1.017085004]
- Inverse variance weighted: *P* = 0.807925918; OR = 1.001241827; 95% CI [0.991273413, 1.011310485]
- Simple mode: *P* = 0.761694735; OR = 1.005618219; 95% CI [0.96993345, 1.042615864]
- Weighted mode: *P* = 0.843700216; OR = 0.997748486; 95% CI [0.975685711, 1.020310157]

1. Sensitivity analysis:

- Heterogeneity test statistic (Cochran's Q) = 139.2635 on 124 degrees of freedom, (p-value = 0.1650). I^2 = 11.0%
- Egger_intercept = 0.000304841851649164; *P* = 0.590683358444014
- MR-PRESSO: `Global Test`$RSSobs = 141.2969; `Global Test`$*P*value = 0.174

## Table S7. The *P* values and FDR values (using BH methods)of causal effects of mtDNA-CN on BIPs (Step 1)

| Num. | id | Reported_Trait | pvalue | FDR | Interpretation |
| --- | --- | --- | --- | --- | --- |
| 1 | GCST90005380 | rfMRI connectivity (ICA100 edge 527) | 1.0999E-06 | 1.5903E-05 | Significant |
| 2 | GCST90003907 | IDP dMRI TBSS FA Sagittal stratum R | 2.3500E-05 | 3.1807E-05 | Significant |
| 3 | GCST90006056 | rfMRI connectivity (ICA100 edge 1203) | 8.3428E-05 | 4.7710E-05 | Nominally Significant |
| 4 | GCST90006151 | rfMRI connectivity (ICA100 edge 1298) | 8.6183E-05 | 6.3613E-05 | Nominally Significant |
| 5 | GCST90005279 | rfMRI connectivity (ICA100 edge 426) | 1.1530E-04 | 7.9517E-05 | Nominally Significant |
| 6 | GCST90004908 | rfMRI connectivity (ICA100 edge 55) | 1.1830E-04 | 9.5420E-05 | Nominally Significant |
| 7 | GCST90004733 | rfMRI connectivity (ICA25 edge 90) | 1.2104E-04 | 1.1132E-04 | Nominally Significant |
| 8 | GCST90004293 | IDP dMRI ProbtrackX L2 ptr r | 1.5615E-04 | 1.2723E-04 | Nominally Significant |
| 9 | GCST90006068 | rfMRI connectivity (ICA100 edge 1215) | 1.6698E-04 | 1.4313E-04 | Nominally Significant |
| 10 | GCST90004991 | rfMRI connectivity (ICA100 edge 138) | 1.6759E-04 | 1.5903E-04 | Nominally Significant |
| 11 | GCST90005563 | rfMRI connectivity (ICA100 edge 710) | 1.8226E-04 | 1.7494E-04 | Nominally Significant |
| 12 | GCST90005406 | rfMRI connectivity (ICA100 edge 553) | 1.8779E-04 | 1.9084E-04 | Significant |
| 13 | GCST90006137 | rfMRI connectivity (ICA100 edge 1284) | 2.2762E-04 | 2.0674E-04 | Nominally Significant |
| 14 | GCST90005169 | rfMRI connectivity (ICA100 edge 316) | 2.3067E-04 | 2.2265E-04 | Nominally Significant |
| 15 | GCST90005570 | rfMRI connectivity (ICA100 edge 717) | 2.4068E-04 | 2.3855E-04 | Nominally Significant |
| 16 | GCST90003920 | IDP dMRI TBSS FA Superior fronto-occipital fasciculus L | 2.4948E-04 | 2.5445E-04 | Significant |
| 17 | GCST90005232 | rfMRI connectivity (ICA100 edge 379) | 2.5595E-04 | 2.7036E-04 | Significant |
| 18 | GCST90004153 | IDP dMRI TBSS L2 Sagittal stratum R | 2.6365E-04 | 2.8626E-04 | Significant |
| 19 | GCST90004151 | IDP dMRI TBSS L2 Posterior thalamic radiation R | 2.6411E-04 | 3.0216E-04 | Significant |
| 20 | GCST90003300 | aparc-a2009s lh area G+S-subcentral | 4.9073E-04 | 3.1807E-04 | Nominally Significant |
| 21 | GCST90003919 | IDP dMRI TBSS FA Superior fronto-occipital fasciculus R | 9.8406E-04 | 3.3397E-04 | Nominally Significant |
| 22 | GCST90004590 | rfMRI amplitudes (ICA100 node 2) | 2.1692E-03 | 3.4987E-04 | Nominally Significant |
| 23 | GCST90004157 | IDP dMRI TBSS L2 Cingulum cingulate gyrus R | 4.3041E-03 | 3.6578E-04 | Nominally Significant |
| 24 | GCST90003905 | IDP dMRI TBSS FA Posterior thalamic radiation R | 5.2199E-03 | 3.8168E-04 | Nominally Significant |
| 25 | GCST90003165 | aparc-pial lh area precuneus | 1.7739E-02 | 3.9758E-04 | Nominally Significant |
| 26 | GCST90005392 | rfMRI connectivity (ICA100 edge 539) | 2.2804E-02 | 4.1349E-04 | Nominally Significant |
| 27 | GCST90003870 | IDP SWI T2star right pallidum | 2.3745E-02 | 4.2939E-04 | Nominally Significant |
| 28 | GCST90006059 | rfMRI connectivity (ICA100 edge 1206) | 2.4885E-02 | 4.4529E-04 | Nominally Significant |
| 29 | GCST90003552 | aparc-DKTatlas lh thickness medialorbitofrontal | 2.6276E-02 | 4.6120E-04 | Nominally Significant |
| 30 | GCST90005394 | rfMRI connectivity (ICA100 edge 541) | 2.6857E-02 | 4.7710E-04 | Nominally Significant |
| 31 | GCST90005102 | rfMRI connectivity (ICA100 edge 249) | 2.8393E-02 | 4.9300E-04 | Nominally Significant |
| 32 | GCST90006052 | rfMRI connectivity (ICA100 edge 1199) | 2.8979E-02 | 5.0891E-04 | Nominally Significant |
| 33 | GCST90005163 | rfMRI connectivity (ICA100 edge 310) | 2.9078E-02 | 5.2481E-04 | Nominally Significant |
| 34 | GCST90006143 | rfMRI connectivity (ICA100 edge 1290) | 2.9336E-02 | 5.4071E-04 | Nominally Significant |
| 35 | GCST90003868 | IDP SWI T2star right putamen | 2.9575E-02 | 5.5662E-04 | Nominally Significant |
| 36 | GCST90005364 | rfMRI connectivity (ICA100 edge 511) | 2.9938E-02 | 5.7252E-04 | Nominally Significant |
| 37 | GCST90005211 | rfMRI connectivity (ICA100 edge 358) | 3.1306E-02 | 5.8842E-04 | Nominally Significant |
| 38 | GCST90005544 | rfMRI connectivity (ICA100 edge 691) | 3.1585E-02 | 6.0433E-04 | Nominally Significant |
| 39 | GCST90004724 | rfMRI connectivity (ICA25 edge 81) | 3.2052E-02 | 6.2023E-04 | Nominally Significant |
| 40 | GCST90004758 | rfMRI connectivity (ICA25 edge 115) | 3.2561E-02 | 6.3613E-04 | Nominally Significant |
| 41 | GCST90006036 | rfMRI connectivity (ICA100 edge 1183) | 3.3096E-02 | 6.5204E-04 | Nominally Significant |
| 42 | GCST90003916 | IDP dMRI TBSS FA Fornix cres+Stria terminalis L | 3.4492E-02 | 6.6794E-04 | Nominally Significant |
| 43 | GCST90005157 | rfMRI connectivity (ICA100 edge 304) | 3.5812E-02 | 6.8384E-04 | Nominally Significant |
| 44 | GCST90004314 | IDP dMRI ProbtrackX L3 ilf l | 3.8075E-02 | 6.9975E-04 | Nominally Significant |
| 45 | GCST90005395 | rfMRI connectivity (ICA100 edge 542) | 3.9349E-02 | 7.1565E-04 | Nominally Significant |
| 46 | GCST90004971 | rfMRI connectivity (ICA100 edge 118) | 3.9500E-02 | 7.3155E-04 | Nominally Significant |
| 47 | GCST90004764 | rfMRI connectivity (ICA25 edge 121) | 4.0682E-02 | 7.4746E-04 | Nominally Significant |
| 48 | GCST90004937 | rfMRI connectivity (ICA100 edge 84) | 4.0742E-02 | 7.6336E-04 | Nominally Significant |
| 49 | GCST90003886 | IDP dMRI TBSS FA Medial lemniscus L | 4.1268E-02 | 7.7926E-04 | Nominally Significant |
| 50 | GCST90005034 | rfMRI connectivity (ICA100 edge 181) | 4.2147E-02 | 7.9517E-04 | Nominally Significant |
| 51 | GCST90003863 | IDP SWI T2star left thalamus | 4.2820E-02 | 8.1107E-04 | Nominally Significant |
| 52 | GCST90004945 | rfMRI connectivity (ICA100 edge 92) | 4.2969E-02 | 8.2697E-04 | Nominally Significant |
| 53 | GCST90003900 | IDP dMRI TBSS FA Anterior corona radiata L | 4.3588E-02 | 8.4288E-04 | Nominally Significant |
| 54 | GCST90004491 | IDP dMRI TBSS ISOVF Cerebral peduncle R | 4.5910E-02 | 8.5878E-04 | Nominally Significant |
| 55 | GCST90004771 | rfMRI connectivity (ICA25 edge 128) | 4.6716E-02 | 8.7468E-04 | Nominally Significant |
| 56 | GCST90003171 | aparc-pial lh area supramarginal | 4.8115E-02 | 8.9059E-04 | Nominally Significant |
| 57 | GCST90003138 | aparc-Desikan rh area frontalpole | 4.9241E-02 | 9.0649E-04 | Nominally Significant |
| 58 | GCST90004904 | rfMRI connectivity (ICA100 edge 51) | 4.9695E-02 | 9.2239E-04 | Nominally Significant |
| 59 | GCST90004348 | IDP dMRI TBSS ICVF Retrolenticular part of internal capsule L | 5.0513E-02 | 9.3830E-04 | Not significant |
| 60 | GCST90003957 | IDP dMRI TBSS MO Fornix | 5.2646E-02 | 9.5420E-04 | Not significant |
| 61 | GCST90004441 | IDP dMRI TBSS OD Fornix cres+Stria terminalis L | 5.3234E-02 | 9.7010E-04 | Not significant |
| 62 | GCST90006118 | rfMRI connectivity (ICA100 edge 1265) | 5.4100E-02 | 9.8601E-04 | Not significant |
| 63 | GCST90003521 | BA-exvivo lh thickness BA45 | 5.4321E-02 | 1.0019E-03 | Not significant |
| 64 | GCST90003908 | IDP dMRI TBSS FA Sagittal stratum L | 5.4645E-02 | 1.0178E-03 | Not significant |
| 65 | GCST90003088 | aparc-Desikan lh area parahippocampal | 5.4724E-02 | 1.0337E-03 | Not significant |
| 66 | GCST90003288 | aparc-DKTatlas rh area precuneus | 5.5444E-02 | 1.0496E-03 | Not significant |
| 67 | GCST90004324 | IDP dMRI ProbtrackX L3 str r | 5.5682E-02 | 1.0655E-03 | Not significant |
| 68 | GCST90002753 | ThalamNuclei rh volume PuL | 5.5862E-02 | 1.0814E-03 | Not significant |
| 69 | GCST90005756 | rfMRI connectivity (ICA100 edge 903) | 5.5864E-02 | 1.0973E-03 | Not significant |
| 70 | GCST90004492 | IDP dMRI TBSS ISOVF Cerebral peduncle L | 5.5950E-02 | 1.1132E-03 | Not significant |
| 71 | GCST90004154 | IDP dMRI TBSS L2 Sagittal stratum L | 5.6268E-02 | 1.1291E-03 | Not significant |
| 72 | GCST90004220 | IDP dMRI ProbtrackX MD ar r | 5.6789E-02 | 1.1450E-03 | Not significant |
| 73 | GCST90002861 | BA-exvivo rh volume perirhinal | 5.6999E-02 | 1.1609E-03 | Not significant |
| 74 | GCST90005153 | rfMRI connectivity (ICA100 edge 300) | 5.7088E-02 | 1.1768E-03 | Not significant |
| 75 | GCST90005647 | rfMRI connectivity (ICA100 edge 794) | 5.7213E-02 | 1.1927E-03 | Not significant |
| 76 | GCST90005278 | rfMRI connectivity (ICA100 edge 425) | 5.7583E-02 | 1.2087E-03 | Not significant |
| 77 | GCST90004641 | rfMRI amplitudes (ICA100 node 53) | 5.7702E-02 | 1.2246E-03 | Not significant |
| 78 | GCST90006147 | rfMRI connectivity (ICA100 edge 1294) | 5.7927E-02 | 1.2405E-03 | Not significant |
| 79 | GCST90004549 | IDP dMRI ProbtrackX ISOVF str r | 5.8923E-02 | 1.2564E-03 | Not significant |
| 80 | GCST90005058 | rfMRI connectivity (ICA100 edge 205) | 5.9444E-02 | 1.2723E-03 | Not significant |
| 81 | GCST90006213 | rfMRI connectivity (ICA100 edge 1360) | 5.9525E-02 | 1.2882E-03 | Not significant |
| 82 | GCST90005145 | rfMRI connectivity (ICA100 edge 292) | 5.9542E-02 | 1.3041E-03 | Not significant |
| 83 | GCST90005422 | rfMRI connectivity (ICA100 edge 569) | 5.9768E-02 | 1.3200E-03 | Not significant |
| 84 | GCST90003915 | IDP dMRI TBSS FA Fornix cres+Stria terminalis R | 5.9951E-02 | 1.3359E-03 | Not significant |
| 85 | GCST90004849 | rfMRI connectivity (ICA25 edge 206) | 6.0347E-02 | 1.3518E-03 | Not significant |
| 86 | GCST90004364 | IDP dMRI TBSS ICVF Cingulum hippocampus L | 6.0598E-02 | 1.3677E-03 | Not significant |
| 87 | GCST90004131 | IDP dMRI TBSS L2 Medial lemniscus R | 6.0916E-02 | 1.3836E-03 | Not significant |
| 88 | GCST90003132 | aparc-Desikan rh area rostralanteriorcingulate | 6.1212E-02 | 1.3995E-03 | Not significant |
| 89 | GCST90004501 | IDP dMRI TBSS ISOVF Superior corona radiata R | 6.1233E-02 | 1.4154E-03 | Not significant |
| 90 | GCST90005082 | rfMRI connectivity (ICA100 edge 229) | 6.1392E-02 | 1.4313E-03 | Not significant |
| 91 | GCST90003932 | IDP dMRI ProbtrackX FA cgh r | 6.1788E-02 | 1.4472E-03 | Not significant |
| 92 | GCST90003910 | IDP dMRI TBSS FA External capsule L | 6.1797E-02 | 1.4631E-03 | Not significant |
| 93 | GCST90006171 | rfMRI connectivity (ICA100 edge 1318) | 6.2499E-02 | 1.4790E-03 | Not significant |
| 94 | GCST90004836 | rfMRI connectivity (ICA25 edge 193) | 6.2551E-02 | 1.4949E-03 | Not significant |
| 95 | GCST90002534 | IDP T1 FAST ROIs R cent operc cortex | 6.2652E-02 | 1.5108E-03 | Not significant |
| 96 | GCST90005505 | rfMRI connectivity (ICA100 edge 652) | 6.2671E-02 | 1.5267E-03 | Not significant |
| 97 | GCST90003689 | aparc-a2009s rh thickness G-front-inf-Orbital | 6.3057E-02 | 1.5426E-03 | Not significant |
| 98 | GCST90003739 | aparc-a2009s rh thickness S-orbital-med-olfact | 6.3477E-02 | 1.5585E-03 | Not significant |
| 99 | GCST90005284 | rfMRI connectivity (ICA100 edge 431) | 6.4498E-02 | 1.5744E-03 | Not significant |
| 100 | GCST90004829 | rfMRI connectivity (ICA25 edge 186) | 6.4781E-02 | 1.5903E-03 | Not significant |
| 101 | GCST90003993 | IDP dMRI TBSS MO Superior longitudinal fasciculus L | 6.4880E-02 | 1.6062E-03 | Not significant |
| 102 | GCST90004445 | IDP dMRI TBSS OD Superior fronto-occipital fasciculus L | 6.4982E-02 | 1.6221E-03 | Not significant |
| 103 | GCST90003436 | aparc-a2009s rh area S-pericallosal | 6.5213E-02 | 1.6380E-03 | Not significant |
| 104 | GCST90004481 | IDP dMRI TBSS ISOVF Splenium of corpus callosum | 6.5859E-02 | 1.6539E-03 | Not significant |
| 105 | GCST90005080 | rfMRI connectivity (ICA100 edge 227) | 6.5981E-02 | 1.6698E-03 | Not significant |
| 106 | GCST90004683 | rfMRI connectivity (ICA25 edge 40) | 6.6621E-02 | 1.6858E-03 | Not significant |
| 107 | GCST90002531 | IDP T1 FAST ROIs L front operc cortex | 6.7210E-02 | 1.7017E-03 | Not significant |
| 108 | GCST90005259 | rfMRI connectivity (ICA100 edge 406) | 6.7677E-02 | 1.7176E-03 | Not significant |
| 109 | GCST90003899 | IDP dMRI TBSS FA Anterior corona radiata R | 6.7680E-02 | 1.7335E-03 | Not significant |
| 110 | GCST90005360 | rfMRI connectivity (ICA100 edge 507) | 6.7760E-02 | 1.7494E-03 | Not significant |
| 111 | GCST90002647 | aseg rh number HolesBeforeFixing | 6.7796E-02 | 1.7653E-03 | Not significant |
| 112 | GCST90004718 | rfMRI connectivity (ICA25 edge 75) | 6.8162E-02 | 1.7812E-03 | Not significant |
| 113 | GCST90004347 | IDP dMRI TBSS ICVF Retrolenticular part of internal capsule R | 6.8271E-02 | 1.7971E-03 | Not significant |
| 114 | GCST90003006 | aparc-a2009s rh volume G+S-cingul-Mid-Post | 6.8365E-02 | 1.8130E-03 | Not significant |
| 115 | GCST90002756 | ThalamNuclei rh volume Pc | 6.8677E-02 | 1.8289E-03 | Not significant |
| 116 | GCST90003231 | BA-exvivo rh area V2 | 6.8793E-02 | 1.8448E-03 | Not significant |
| 117 | GCST90004815 | rfMRI connectivity (ICA25 edge 172) | 6.9080E-02 | 1.8607E-03 | Not significant |
| 118 | GCST90004774 | rfMRI connectivity (ICA25 edge 131) | 7.0177E-02 | 1.8766E-03 | Not significant |
| 119 | GCST90003670 | aparc-a2009s lh thickness S-precentral-inf-part | 7.0576E-02 | 1.8925E-03 | Not significant |
| 120 | GCST90006133 | rfMRI connectivity (ICA100 edge 1280) | 7.0645E-02 | 1.9084E-03 | Not significant |
| 121 | GCST90003914 | IDP dMRI TBSS FA Cingulum hippocampus L | 7.0712E-02 | 1.9243E-03 | Not significant |
| 122 | GCST90005333 | rfMRI connectivity (ICA100 edge 480) | 7.0947E-02 | 1.9402E-03 | Not significant |
| 123 | GCST90002771 | aparc-Desikan lh volume caudalmiddlefrontal | 7.1004E-02 | 1.9561E-03 | Not significant |
| 124 | GCST90003806 | wg lh intensity-contrast middletemporal | 7.1147E-02 | 1.9720E-03 | Not significant |
| 125 | GCST90004547 | IDP dMRI ProbtrackX ISOVF slf r | 7.1328E-02 | 1.9879E-03 | Not significant |
| 126 | GCST90005351 | rfMRI connectivity (ICA100 edge 498) | 7.1440E-02 | 2.0038E-03 | Not significant |
| 127 | GCST90003951 | IDP dMRI ProbtrackX FA unc r | 7.1442E-02 | 2.0197E-03 | Not significant |
| 128 | GCST90002521 | IDP T1 FAST ROIs L lingual gyrus | 7.1633E-02 | 2.0356E-03 | Not significant |
| 129 | GCST90003477 | aparc-Desikan lh thickness transversetemporal | 7.1737E-02 | 2.0515E-03 | Not significant |
| 130 | GCST90003661 | aparc-a2009s lh thickness S-occipital-ant | 7.1749E-02 | 2.0674E-03 | Not significant |
| 131 | GCST90003697 | aparc-a2009s rh thickness G-oc-temp-lat-fusifor | 7.2308E-02 | 2.0833E-03 | Not significant |
| 132 | GCST90003557 | aparc-DKTatlas lh thickness parsorbitalis | 7.2381E-02 | 2.0992E-03 | Not significant |
| 133 | GCST90003554 | aparc-DKTatlas lh thickness parahippocampal | 7.2565E-02 | 2.1151E-03 | Not significant |
| 134 | GCST90002540 | IDP T1 FAST ROIs R heschl gyrus | 7.3204E-02 | 2.1310E-03 | Not significant |
| 135 | GCST90004059 | IDP dMRI TBSS MD External capsule R | 7.3671E-02 | 2.1469E-03 | Not significant |
| 136 | GCST90002693 | HippSubfield rh volume subiculum-head | 7.3747E-02 | 2.1628E-03 | Not significant |
| 137 | GCST90006012 | rfMRI connectivity (ICA100 edge 1159) | 7.4087E-02 | 2.1788E-03 | Not significant |
| 138 | GCST90005200 | rfMRI connectivity (ICA100 edge 347) | 7.4110E-02 | 2.1947E-03 | Not significant |
| 139 | GCST90003476 | aparc-Desikan lh thickness frontalpole | 7.4206E-02 | 2.2106E-03 | Not significant |
| 140 | GCST90006265 | rfMRI connectivity (ICA100 edge 1412) | 7.4569E-02 | 2.2265E-03 | Not significant |
| 141 | GCST90005892 | rfMRI connectivity (ICA100 edge 1039) | 7.4839E-02 | 2.2424E-03 | Not significant |
| 142 | GCST90003105 | aparc-Desikan lh area transversetemporal | 7.5002E-02 | 2.2583E-03 | Not significant |
| 143 | GCST90004391 | IDP dMRI ProbtrackX ICVF mcp | 7.5582E-02 | 2.2742E-03 | Not significant |
| 144 | GCST90005949 | rfMRI connectivity (ICA100 edge 1096) | 7.5596E-02 | 2.2901E-03 | Not significant |
| 145 | GCST90004585 | rfMRI amplitudes (ICA25 node 18) | 7.5871E-02 | 2.3060E-03 | Not significant |
| 146 | GCST90003174 | aparc-pial rh area TotalSurface | 7.6059E-02 | 2.3219E-03 | Not significant |
| 147 | GCST90002714 | ThalamNuclei lh volume PuI | 7.6228E-02 | 2.3378E-03 | Not significant |
| 148 | GCST90002603 | aseg global volume CSF | 7.6276E-02 | 2.3537E-03 | Not significant |
| 149 | GCST90004292 | IDP dMRI ProbtrackX L2 ptr l | 7.7648E-02 | 2.3696E-03 | Not significant |
| 150 | GCST90004487 | IDP dMRI TBSS ISOVF Inferior cerebellar peduncle R | 7.7764E-02 | 2.3855E-03 | Not significant |
| 151 | GCST90003849 | wg rh intensity-contrast posteriorcingulate | 7.8246E-02 | 2.4014E-03 | Not significant |
| 152 | GCST90006080 | rfMRI connectivity (ICA100 edge 1227) | 7.8359E-02 | 2.4173E-03 | Not significant |
| 153 | GCST90003245 | aparc-DKTatlas lh area lingual | 7.8385E-02 | 2.4332E-03 | Not significant |
| 154 | GCST90004486 | IDP dMRI TBSS ISOVF Medial lemniscus L | 7.8515E-02 | 2.4491E-03 | Not significant |
| 155 | GCST90004493 | IDP dMRI TBSS ISOVF Anterior limb of internal capsule R | 7.8641E-02 | 2.4650E-03 | Not significant |
| 156 | GCST90004649 | rfMRI connectivity (ICA25 edge 6) | 7.8791E-02 | 2.4809E-03 | Not significant |
| 157 | GCST90006104 | rfMRI connectivity (ICA100 edge 1251) | 7.8877E-02 | 2.4968E-03 | Not significant |
| 158 | GCST90003052 | aparc-a2009s rh volume S-front-sup | 7.9043E-02 | 2.5127E-03 | Not significant |
| 159 | GCST90002464 | IDP T1 FAST ROIs R precentral gyrus | 7.9313E-02 | 2.5286E-03 | Not significant |
| 160 | GCST90004624 | rfMRI amplitudes (ICA100 node 36) | 7.9669E-02 | 2.5445E-03 | Not significant |
| 161 | GCST90002760 | ThalamNuclei lh volume LD | 7.9685E-02 | 2.5604E-03 | Not significant |
| 162 | GCST90005187 | rfMRI connectivity (ICA100 edge 334) | 7.9779E-02 | 2.5763E-03 | Not significant |
| 163 | GCST90004567 | IDP tfMRI 90th-percentile zstat faces-shapes amygdala | 7.9819E-02 | 2.5922E-03 | Not significant |
| 164 | GCST90004226 | IDP dMRI ProbtrackX MD cgh r | 8.1884E-02 | 2.6081E-03 | Not significant |
| 165 | GCST90003936 | IDP dMRI ProbtrackX FA fmi | 8.2134E-02 | 2.6240E-03 | Not significant |
| 166 | GCST90002850 | BA-exvivo rh volume BA2 | 8.2255E-02 | 2.6399E-03 | Not significant |
| 167 | GCST90003753 | aseg global intensity 5th-Ventricle | 8.2483E-02 | 2.6559E-03 | Not significant |
| 168 | GCST90002583 | IDP T1 FAST ROIs R cerebellum VIIIb | 8.2891E-02 | 2.6718E-03 | Not significant |
| 169 | GCST90004221 | IDP dMRI ProbtrackX MD atr l | 8.3188E-02 | 2.6877E-03 | Not significant |
| 170 | GCST90004137 | IDP dMRI TBSS L2 Cerebral peduncle R | 8.3924E-02 | 2.7036E-03 | Not significant |
| 171 | GCST90006159 | rfMRI connectivity (ICA100 edge 1306) | 8.3982E-02 | 2.7195E-03 | Not significant |
| 172 | GCST90003814 | wg lh intensity-contrast posteriorcingulate | 8.4216E-02 | 2.7354E-03 | Not significant |
| 173 | GCST90005716 | rfMRI connectivity (ICA100 edge 863) | 8.4418E-02 | 2.7513E-03 | Not significant |
| 174 | GCST90004330 | IDP dMRI TBSS ICVF Body of corpus callosum | 8.4444E-02 | 2.7672E-03 | Not significant |
| 175 | GCST90006324 | rfMRI connectivity (ICA100 edge 1471) | 8.4479E-02 | 2.7831E-03 | Not significant |
| 176 | GCST90004410 | IDP dMRI TBSS OD Medial lemniscus R | 8.4899E-02 | 2.7990E-03 | Not significant |
| 177 | GCST90002828 | aparc-Desikan rh volume superiorfrontal | 8.5043E-02 | 2.8149E-03 | Not significant |
| 178 | GCST90002818 | aparc-Desikan rh volume parsopercularis | 8.5590E-02 | 2.8308E-03 | Not significant |
| 179 | GCST90004521 | IDP dMRI TBSS ISOVF Uncinate fasciculus R | 8.6205E-02 | 2.8467E-03 | Not significant |
| 180 | GCST90005521 | rfMRI connectivity (ICA100 edge 668) | 8.6291E-02 | 2.8626E-03 | Not significant |
| 181 | GCST90002715 | ThalamNuclei lh volume PuM | 8.6305E-02 | 2.8785E-03 | Not significant |
| 182 | GCST90002651 | AmygNuclei lh volume Anterior-amygdaloid-area-AAA | 8.6631E-02 | 2.8944E-03 | Not significant |
| 183 | GCST90004699 | rfMRI connectivity (ICA25 edge 56) | 8.6991E-02 | 2.9103E-03 | Not significant |
| 184 | GCST90003299 | aparc-a2009s lh area G+S-paracentral | 8.7095E-02 | 2.9262E-03 | Not significant |
| 185 | GCST90004168 | IDP dMRI TBSS L2 Uncinate fasciculus L | 8.7476E-02 | 2.9421E-03 | Not significant |
| 186 | GCST90003599 | aparc-DKTatlas rh thickness superiortemporal | 8.7569E-02 | 2.9580E-03 | Not significant |
| 187 | GCST90006002 | rfMRI connectivity (ICA100 edge 1149) | 8.7691E-02 | 2.9739E-03 | Not significant |
| 188 | GCST90003262 | aparc-DKTatlas lh area superiortemporal | 8.8629E-02 | 2.9898E-03 | Not significant |
| 189 | GCST90004376 | IDP dMRI ProbtrackX ICVF ar r | 8.8683E-02 | 3.0057E-03 | Not significant |
| 190 | GCST90003015 | aparc-a2009s rh volume G-Ins-lg+S-cent-ins | 8.8723E-02 | 3.0216E-03 | Not significant |
| 191 | GCST90004500 | IDP dMRI TBSS ISOVF Anterior corona radiata L | 8.8822E-02 | 3.0375E-03 | Not significant |
| 192 | GCST90005882 | rfMRI connectivity (ICA100 edge 1029) | 8.9290E-02 | 3.0534E-03 | Not significant |
| 193 | GCST90003290 | aparc-DKTatlas rh area rostralmiddlefrontal | 8.9292E-02 | 3.0693E-03 | Not significant |
| 194 | GCST90005331 | rfMRI connectivity (ICA100 edge 478) | 8.9573E-02 | 3.0852E-03 | Not significant |
| 195 | GCST90003847 | wg rh intensity-contrast pericalcarine | 8.9683E-02 | 3.1011E-03 | Not significant |
| 196 | GCST90004448 | IDP dMRI TBSS OD Tapetum R | 8.9906E-02 | 3.1170E-03 | Not significant |
| 197 | GCST90003719 | aparc-a2009s rh thickness Pole-temporal | 9.0149E-02 | 3.1330E-03 | Not significant |
| 198 | GCST90004310 | IDP dMRI ProbtrackX L3 fma | 9.0833E-02 | 3.1489E-03 | Not significant |
| 199 | GCST90004837 | rfMRI connectivity (ICA25 edge 194) | 9.1031E-02 | 3.1648E-03 | Not significant |
| 200 | GCST90003602 | aparc-DKTatlas rh thickness insula | 9.1245E-02 | 3.1807E-03 | Not significant |
| 201 | GCST90005368 | rfMRI connectivity (ICA100 edge 515) | 9.1407E-02 | 3.1966E-03 | Not significant |
| 202 | GCST90003651 | aparc-a2009s lh thickness S-circular-insula-sup | 9.2484E-02 | 3.2125E-03 | Not significant |
| 203 | GCST90002764 | Brainstem global volume Medulla | 9.2536E-02 | 3.2284E-03 | Not significant |
| 204 | GCST90005679 | rfMRI connectivity (ICA100 edge 826) | 9.2943E-02 | 3.2443E-03 | Not significant |
| 205 | GCST90004082 | IDP dMRI TBSS L1 Corticospinal tract L | 9.2955E-02 | 3.2602E-03 | Not significant |
| 206 | GCST90005033 | rfMRI connectivity (ICA100 edge 180) | 9.3036E-02 | 3.2761E-03 | Not significant |
| 207 | GCST90005529 | rfMRI connectivity (ICA100 edge 676) | 9.3121E-02 | 3.2920E-03 | Not significant |
| 208 | GCST90005902 | rfMRI connectivity (ICA100 edge 1049) | 9.3142E-02 | 3.3079E-03 | Not significant |
| 209 | GCST90004260 | IDP dMRI ProbtrackX L1 ilf l | 9.3392E-02 | 3.3238E-03 | Not significant |
| 210 | GCST90003686 | aparc-a2009s rh thickness G-cingul-Post-ventral | 9.3452E-02 | 3.3397E-03 | Not significant |
| 211 | GCST90003329 | aparc-a2009s lh area G-temp-sup-G-T-transv | 9.3479E-02 | 3.3556E-03 | Not significant |
| 212 | GCST90005601 | rfMRI connectivity (ICA100 edge 748) | 9.3563E-02 | 3.3715E-03 | Not significant |
| 213 | GCST90005101 | rfMRI connectivity (ICA100 edge 248) | 9.7479E-02 | 3.3874E-03 | Not significant |
| 214 | GCST90003218 | BA-exvivo lh area MT | 9.8034E-02 | 3.4033E-03 | Not significant |
| 215 | GCST90004725 | rfMRI connectivity (ICA25 edge 82) | 9.8544E-02 | 3.4192E-03 | Not significant |
| 216 | GCST90005099 | rfMRI connectivity (ICA100 edge 246) | 1.0293E-01 | 3.4351E-03 | Not significant |
| 217 | GCST90003749 | aparc-a2009s rh thickness S-temporal-sup | 1.0334E-01 | 3.4510E-03 | Not significant |
| 218 | GCST90003050 | aparc-a2009s rh volume S-front-inf | 1.0362E-01 | 3.4669E-03 | Not significant |
| 219 | GCST90005905 | rfMRI connectivity (ICA100 edge 1052) | 1.0365E-01 | 3.4828E-03 | Not significant |
| 220 | GCST90003639 | aparc-a2009s lh thickness G-temporal-inf | 1.0370E-01 | 3.4987E-03 | Not significant |
| 221 | GCST90003146 | aparc-pial lh area entorhinal | 1.0383E-01 | 3.5146E-03 | Not significant |
| 222 | GCST90005542 | rfMRI connectivity (ICA100 edge 689) | 1.0413E-01 | 3.5305E-03 | Not significant |
| 223 | GCST90004022 | IDP dMRI ProbtrackX MO slf r | 1.0413E-01 | 3.5464E-03 | Not significant |
| 224 | GCST90004006 | IDP dMRI ProbtrackX MO cgh l | 1.0456E-01 | 3.5623E-03 | Not significant |
| 225 | GCST90005984 | rfMRI connectivity (ICA100 edge 1131) | 1.0499E-01 | 3.5782E-03 | Not significant |
| 226 | GCST90005139 | rfMRI connectivity (ICA100 edge 286) | 1.0541E-01 | 3.5941E-03 | Not significant |
| 227 | GCST90005978 | rfMRI connectivity (ICA100 edge 1125) | 1.0545E-01 | 3.6101E-03 | Not significant |
| 228 | GCST90003350 | aparc-a2009s lh area S-front-sup | 1.0597E-01 | 3.6260E-03 | Not significant |
| 229 | GCST90006320 | rfMRI connectivity (ICA100 edge 1467) | 1.0632E-01 | 3.6419E-03 | Not significant |
| 230 | GCST90002595 | aseg global volume SupraTentorial | 1.0655E-01 | 3.6578E-03 | Not significant |
| 231 | GCST90006311 | rfMRI connectivity (ICA100 edge 1458) | 1.0698E-01 | 3.6737E-03 | Not significant |
| 232 | GCST90004667 | rfMRI connectivity (ICA25 edge 24) | 1.0738E-01 | 3.6896E-03 | Not significant |
| 233 | GCST90003746 | aparc-a2009s rh thickness S-suborbital | 1.0790E-01 | 3.7055E-03 | Not significant |
| 234 | GCST90004818 | rfMRI connectivity (ICA25 edge 175) | 1.0831E-01 | 3.7214E-03 | Not significant |
| 235 | GCST90005909 | rfMRI connectivity (ICA100 edge 1056) | 1.0908E-01 | 3.7373E-03 | Not significant |
| 236 | GCST90005839 | rfMRI connectivity (ICA100 edge 986) | 1.0926E-01 | 3.7532E-03 | Not significant |
| 237 | GCST90003960 | IDP dMRI TBSS MO Medial lemniscus R | 1.0932E-01 | 3.7691E-03 | Not significant |
| 238 | GCST90002624 | aseg lh volume Hippocampus | 1.0978E-01 | 3.7850E-03 | Not significant |
| 239 | GCST90006170 | rfMRI connectivity (ICA100 edge 1317) | 1.0991E-01 | 3.8009E-03 | Not significant |
| 240 | GCST90002565 | IDP T1 FAST ROIs R cerebellum V | 1.1009E-01 | 3.8168E-03 | Not significant |
| 241 | GCST90004372 | IDP dMRI TBSS ICVF Uncinate fasciculus L | 1.1014E-01 | 3.8327E-03 | Not significant |
| 242 | GCST90004731 | rfMRI connectivity (ICA25 edge 88) | 1.1134E-01 | 3.8486E-03 | Not significant |
| 243 | GCST90004821 | rfMRI connectivity (ICA25 edge 178) | 1.1140E-01 | 3.8645E-03 | Not significant |
| 244 | GCST90005375 | rfMRI connectivity (ICA100 edge 522) | 1.1171E-01 | 3.8804E-03 | Not significant |
| 245 | GCST90004817 | rfMRI connectivity (ICA25 edge 174) | 1.1175E-01 | 3.8963E-03 | Not significant |
| 246 | GCST90002485 | IDP T1 FAST ROIs L sup parietal lobule | 1.1197E-01 | 3.9122E-03 | Not significant |
| 247 | GCST90004969 | rfMRI connectivity (ICA100 edge 116) | 1.1266E-01 | 3.9281E-03 | Not significant |
| 248 | GCST90004912 | rfMRI connectivity (ICA100 edge 59) | 1.1277E-01 | 3.9440E-03 | Not significant |
| 249 | GCST90003188 | aparc-pial rh area middletemporal | 1.1327E-01 | 3.9599E-03 | Not significant |
| 250 | GCST90002533 | IDP T1 FAST ROIs L cent operc cortex | 1.1398E-01 | 3.9758E-03 | Not significant |
| 251 | GCST90004275 | IDP dMRI ProbtrackX L2 atr l | 1.1424E-01 | 3.9917E-03 | Not significant |
| 252 | GCST90003525 | BA-exvivo lh thickness perirhinal | 1.1557E-01 | 4.0076E-03 | Not significant |
| 253 | GCST90005349 | rfMRI connectivity (ICA100 edge 496) | 1.1566E-01 | 4.0235E-03 | Not significant |
| 254 | GCST90003222 | BA-exvivo rh area BA2 | 1.1580E-01 | 4.0394E-03 | Not significant |
| 255 | GCST90002605 | aseg global volume non-WM-hypointensities | 1.1585E-01 | 4.0553E-03 | Not significant |
| 256 | GCST90002977 | aparc-a2009s lh volume S-front-middle | 1.1609E-01 | 4.0712E-03 | Not significant |
| 257 | GCST90005743 | rfMRI connectivity (ICA100 edge 890) | 1.1614E-01 | 4.0872E-03 | Not significant |
| 258 | GCST90005227 | rfMRI connectivity (ICA100 edge 374) | 1.1615E-01 | 4.1031E-03 | Not significant |
| 259 | GCST90002835 | BA-exvivo lh volume BA1 | 1.1640E-01 | 4.1190E-03 | Not significant |
| 260 | GCST90005512 | rfMRI connectivity (ICA100 edge 659) | 1.1660E-01 | 4.1349E-03 | Not significant |
| 261 | GCST90003573 | aparc-DKTatlas rh thickness caudalmiddlefrontal | 1.1672E-01 | 4.1508E-03 | Not significant |
| 262 | GCST90005305 | rfMRI connectivity (ICA100 edge 452) | 1.1749E-01 | 4.1667E-03 | Not significant |
| 263 | GCST90002579 | IDP T1 FAST ROIs V cerebellum VIIIa | 1.1776E-01 | 4.1826E-03 | Not significant |
| 264 | GCST90002987 | aparc-a2009s lh volume S-orbital-med-olfact | 1.1781E-01 | 4.1985E-03 | Not significant |
| 265 | GCST90006288 | rfMRI connectivity (ICA100 edge 1435) | 1.1803E-01 | 4.2144E-03 | Not significant |
| 266 | GCST90003695 | aparc-a2009s rh thickness G-occipital-middle | 1.1808E-01 | 4.2303E-03 | Not significant |
| 267 | GCST90002484 | IDP T1 FAST ROIs R postcent gyrus | 1.1851E-01 | 4.2462E-03 | Not significant |
| 268 | GCST90004692 | rfMRI connectivity (ICA25 edge 49) | 1.1982E-01 | 4.2621E-03 | Not significant |
| 269 | GCST90004135 | IDP dMRI TBSS L2 Superior cerebellar peduncle R | 1.1989E-01 | 4.2780E-03 | Not significant |
| 270 | GCST90003788 | aseg rh intensity Accumbens-area | 1.2016E-01 | 4.2939E-03 | Not significant |
| 271 | GCST90004116 | IDP dMRI TBSS L1 Superior longitudinal fasciculus L | 1.2034E-01 | 4.3098E-03 | Not significant |
| 272 | GCST90006348 | QC T1 inverse SNR | 1.2095E-01 | 4.3257E-03 | Not significant |
| 273 | GCST90006031 | rfMRI connectivity (ICA100 edge 1178) | 1.2119E-01 | 4.3416E-03 | Not significant |
| 274 | GCST90005174 | rfMRI connectivity (ICA100 edge 321) | 1.2140E-01 | 4.3575E-03 | Not significant |
| 275 | GCST90002732 | ThalamNuclei lh volume AV | 1.2156E-01 | 4.3734E-03 | Not significant |
| 276 | GCST90005988 | rfMRI connectivity (ICA100 edge 1135) | 1.2161E-01 | 4.3893E-03 | Not significant |
| 277 | GCST90002884 | aparc-DKTatlas lh volume precentral | 1.2213E-01 | 4.4052E-03 | Not significant |
| 278 | GCST90005708 | rfMRI connectivity (ICA100 edge 855) | 1.2230E-01 | 4.4211E-03 | Not significant |
| 279 | GCST90003510 | aparc-Desikan rh thickness frontalpole | 1.2246E-01 | 4.4370E-03 | Not significant |
| 280 | GCST90003514 | BA-exvivo lh thickness BA2 | 1.2251E-01 | 4.4529E-03 | Not significant |
| 281 | GCST90003131 | aparc-Desikan rh area precuneus | 1.2326E-01 | 4.4688E-03 | Not significant |
| 282 | GCST90005075 | rfMRI connectivity (ICA100 edge 222) | 1.2344E-01 | 4.4847E-03 | Not significant |
| 283 | GCST90005314 | rfMRI connectivity (ICA100 edge 461) | 1.2358E-01 | 4.5006E-03 | Not significant |
| 284 | GCST90003419 | aparc-a2009s rh area S-circular-insula-sup | 1.2377E-01 | 4.5165E-03 | Not significant |
| 285 | GCST90002786 | aparc-Desikan lh volume parsorbitalis | 1.2396E-01 | 4.5324E-03 | Not significant |
| 286 | GCST90005616 | rfMRI connectivity (ICA100 edge 763) | 1.2421E-01 | 4.5483E-03 | Not significant |
| 287 | GCST90003368 | aparc-a2009s lh area S-temporal-inf | 1.2425E-01 | 4.5642E-03 | Not significant |
| 288 | GCST90006111 | rfMRI connectivity (ICA100 edge 1258) | 1.2435E-01 | 4.5802E-03 | Not significant |
| 289 | GCST90003365 | aparc-a2009s lh area S-precentral-sup-part | 1.2438E-01 | 4.5961E-03 | Not significant |
| 290 | GCST90006234 | rfMRI connectivity (ICA100 edge 1381) | 1.2461E-01 | 4.6120E-03 | Not significant |
| 291 | GCST90005298 | rfMRI connectivity (ICA100 edge 445) | 1.2462E-01 | 4.6279E-03 | Not significant |
| 292 | GCST90004888 | rfMRI connectivity (ICA100 edge 35) | 1.2491E-01 | 4.6438E-03 | Not significant |
| 293 | GCST90005110 | rfMRI connectivity (ICA100 edge 257) | 1.2494E-01 | 4.6597E-03 | Not significant |
| 294 | GCST90005461 | rfMRI connectivity (ICA100 edge 608) | 1.2533E-01 | 4.6756E-03 | Not significant |
| 295 | GCST90003874 | IDP SWI T2star right amygdala | 1.2647E-01 | 4.6915E-03 | Not significant |
| 296 | GCST90005895 | rfMRI connectivity (ICA100 edge 1042) | 1.2714E-01 | 4.7074E-03 | Not significant |
| 297 | GCST90004295 | IDP dMRI ProbtrackX L2 slf r | 1.2755E-01 | 4.7233E-03 | Not significant |
| 298 | GCST90003774 | aseg lh intensity Accumbens-area | 1.2756E-01 | 4.7392E-03 | Not significant |
| 299 | GCST90004669 | rfMRI connectivity (ICA25 edge 26) | 1.2786E-01 | 4.7551E-03 | Not significant |
| 300 | GCST90005242 | rfMRI connectivity (ICA100 edge 389) | 1.2819E-01 | 4.7710E-03 | Not significant |
| 301 | GCST90005897 | rfMRI connectivity (ICA100 edge 1044) | 1.2848E-01 | 4.7869E-03 | Not significant |
| 302 | GCST90004520 | IDP dMRI TBSS ISOVF Superior fronto-occipital fasciculus L | 1.2853E-01 | 4.8028E-03 | Not significant |
| 303 | GCST90005385 | rfMRI connectivity (ICA100 edge 532) | 1.2878E-01 | 4.8187E-03 | Not significant |
| 304 | GCST90005118 | rfMRI connectivity (ICA100 edge 265) | 1.2923E-01 | 4.8346E-03 | Not significant |
| 305 | GCST90006129 | rfMRI connectivity (ICA100 edge 1276) | 1.3000E-01 | 4.8505E-03 | Not significant |
| 306 | GCST90003036 | aparc-a2009s rh volume G-temporal-middle | 1.3052E-01 | 4.8664E-03 | Not significant |
| 307 | GCST90002798 | aparc-Desikan lh volume supramarginal | 1.3142E-01 | 4.8823E-03 | Not significant |
| 308 | GCST90003711 | aparc-a2009s rh thickness G-temp-sup-Plan-polar | 1.3166E-01 | 4.8982E-03 | Not significant |
| 309 | GCST90006083 | rfMRI connectivity (ICA100 edge 1230) | 1.3171E-01 | 4.9141E-03 | Not significant |
| 310 | GCST90003740 | aparc-a2009s rh thickness S-orbital-H-Shaped | 1.3203E-01 | 4.9300E-03 | Not significant |
| 311 | GCST90002758 | ThalamNuclei rh volume AV | 1.3284E-01 | 4.9459E-03 | Not significant |
| 312 | GCST90005590 | rfMRI connectivity (ICA100 edge 737) | 1.3319E-01 | 4.9618E-03 | Not significant |
| 313 | GCST90006359 | QC tfMRI inverse tSNR | 1.3393E-01 | 4.9777E-03 | Not significant |
| 314 | GCST90005246 | rfMRI connectivity (ICA100 edge 393) | 1.3422E-01 | 4.9936E-03 | Not significant |
| 315 | GCST90003095 | aparc-Desikan lh area posteriorcingulate | 1.3428E-01 | 5.0095E-03 | Not significant |
| 316 | GCST90003116 | aparc-Desikan rh area isthmuscingulate | 1.3456E-01 | 5.0254E-03 | Not significant |
| 317 | GCST90002577 | IDP T1 FAST ROIs R cerebellum VIIb | 1.3459E-01 | 5.0413E-03 | Not significant |
| 318 | GCST90003090 | aparc-Desikan lh area parsopercularis | 1.3490E-01 | 5.0573E-03 | Not significant |
| 319 | GCST90005714 | rfMRI connectivity (ICA100 edge 861) | 1.3513E-01 | 5.0732E-03 | Not significant |
| 320 | GCST90004017 | IDP dMRI ProbtrackX MO ml l | 1.3553E-01 | 5.0891E-03 | Not significant |
| 321 | GCST90003584 | aparc-DKTatlas rh thickness middletemporal | 1.3566E-01 | 5.1050E-03 | Not significant |
| 322 | GCST90002935 | aparc-a2009s lh volume G-cuneus | 1.3570E-01 | 5.1209E-03 | Not significant |
| 323 | GCST90003853 | wg rh intensity-contrast rostralmiddlefrontal | 1.3602E-01 | 5.1368E-03 | Not significant |
| 324 | GCST90004066 | IDP dMRI TBSS MD Fornix cres+Stria terminalis L | 1.3630E-01 | 5.1527E-03 | Not significant |
| 325 | GCST90005158 | rfMRI connectivity (ICA100 edge 305) | 1.3638E-01 | 5.1686E-03 | Not significant |
| 326 | GCST90002726 | ThalamNuclei lh volume VA | 1.3659E-01 | 5.1845E-03 | Not significant |
| 327 | GCST90005182 | rfMRI connectivity (ICA100 edge 329) | 1.3727E-01 | 5.2004E-03 | Not significant |
| 328 | GCST90003328 | aparc-a2009s lh area G-subcallosal | 1.3747E-01 | 5.2163E-03 | Not significant |
| 329 | GCST90005261 | rfMRI connectivity (ICA100 edge 408) | 1.3770E-01 | 5.2322E-03 | Not significant |
| 330 | GCST90006220 | rfMRI connectivity (ICA100 edge 1367) | 1.3801E-01 | 5.2481E-03 | Not significant |
| 331 | GCST90003355 | aparc-a2009s lh area S-occipital-ant | 1.3817E-01 | 5.2640E-03 | Not significant |
| 332 | GCST90003380 | aparc-a2009s rh area G-cingul-Post-ventral | 1.3822E-01 | 5.2799E-03 | Not significant |
| 333 | GCST90002589 | IDP T1 FAST ROIs R cerebellum X | 1.3846E-01 | 5.2958E-03 | Not significant |
| 334 | GCST90006242 | rfMRI connectivity (ICA100 edge 1389) | 1.3851E-01 | 5.3117E-03 | Not significant |
| 335 | GCST90003692 | aparc-a2009s rh thickness G-front-sup | 1.3921E-01 | 5.3276E-03 | Not significant |
| 336 | GCST90006201 | rfMRI connectivity (ICA100 edge 1348) | 1.3994E-01 | 5.3435E-03 | Not significant |
| 337 | GCST90006301 | rfMRI connectivity (ICA100 edge 1448) | 1.4018E-01 | 5.3594E-03 | Not significant |
| 338 | GCST90004650 | rfMRI connectivity (ICA25 edge 7) | 1.4028E-01 | 5.3753E-03 | Not significant |
| 339 | GCST90003819 | wg lh intensity-contrast superiorfrontal | 1.4028E-01 | 5.3912E-03 | Not significant |
| 340 | GCST90002779 | aparc-Desikan lh volume lateralorbitofrontal | 1.4046E-01 | 5.4071E-03 | Not significant |
| 341 | GCST90003412 | aparc-a2009s rh area Pole-occipital | 1.4054E-01 | 5.4230E-03 | Not significant |
| 342 | GCST90002663 | AmygNuclei rh volume Medial-nucleus | 1.4065E-01 | 5.4389E-03 | Not significant |
| 343 | GCST90005572 | rfMRI connectivity (ICA100 edge 719) | 1.4114E-01 | 5.4548E-03 | Not significant |
| 344 | GCST90004653 | rfMRI connectivity (ICA25 edge 10) | 1.4146E-01 | 5.4707E-03 | Not significant |
| 345 | GCST90004033 | IDP dMRI TBSS MD Corticospinal tract R | 1.4154E-01 | 5.4866E-03 | Not significant |
| 346 | GCST90005303 | rfMRI connectivity (ICA100 edge 450) | 1.4178E-01 | 5.5025E-03 | Not significant |
| 347 | GCST90003555 | aparc-DKTatlas lh thickness paracentral | 1.4228E-01 | 5.5184E-03 | Not significant |
| 348 | GCST90004516 | IDP dMRI TBSS ISOVF Fornix cres+Stria terminalis L | 1.4244E-01 | 5.5344E-03 | Not significant |
| 349 | GCST90003861 | wg rh intensity-contrast insula | 1.4255E-01 | 5.5503E-03 | Not significant |
| 350 | GCST90002719 | ThalamNuclei lh volume VLa | 1.4285E-01 | 5.5662E-03 | Not significant |
| 351 | GCST90004050 | IDP dMRI TBSS MD Anterior corona radiata L | 1.4319E-01 | 5.5821E-03 | Not significant |
| 352 | GCST90003771 | aseg lh intensity Pallidum | 1.4359E-01 | 5.5980E-03 | Not significant |
| 353 | GCST90005746 | rfMRI connectivity (ICA100 edge 893) | 1.4388E-01 | 5.6139E-03 | Not significant |
| 354 | GCST90005078 | rfMRI connectivity (ICA100 edge 225) | 1.4399E-01 | 5.6298E-03 | Not significant |
| 355 | GCST90005910 | rfMRI connectivity (ICA100 edge 1057) | 1.4415E-01 | 5.6457E-03 | Not significant |
| 356 | GCST90005731 | rfMRI connectivity (ICA100 edge 878) | 1.4452E-01 | 5.6616E-03 | Not significant |
| 357 | GCST90004746 | rfMRI connectivity (ICA25 edge 103) | 1.4457E-01 | 5.6775E-03 | Not significant |
| 358 | GCST90004704 | rfMRI connectivity (ICA25 edge 61) | 1.4459E-01 | 5.6934E-03 | Not significant |
| 359 | GCST90003786 | aseg rh intensity Hippocampus | 1.4508E-01 | 5.7093E-03 | Not significant |
| 360 | GCST90003659 | aparc-a2009s lh thickness S-oc-middle+Lunatus | 1.4516E-01 | 5.7252E-03 | Not significant |
| 361 | GCST90006000 | rfMRI connectivity (ICA100 edge 1147) | 1.4579E-01 | 5.7411E-03 | Not significant |
| 362 | GCST90002882 | aparc-DKTatlas lh volume postcentral | 1.4596E-01 | 5.7570E-03 | Not significant |
| 363 | GCST90003081 | aparc-Desikan lh area inferiortemporal | 1.4603E-01 | 5.7729E-03 | Not significant |
| 364 | GCST90006039 | rfMRI connectivity (ICA100 edge 1186) | 1.4662E-01 | 5.7888E-03 | Not significant |
| 365 | GCST90004992 | rfMRI connectivity (ICA100 edge 139) | 1.4688E-01 | 5.8047E-03 | Not significant |
| 366 | GCST90003841 | wg rh intensity-contrast middletemporal | 1.4727E-01 | 5.8206E-03 | Not significant |
| 367 | GCST90003154 | aparc-pial lh area medialorbitofrontal | 1.4790E-01 | 5.8365E-03 | Not significant |
| 368 | GCST90005325 | rfMRI connectivity (ICA100 edge 472) | 1.4790E-01 | 5.8524E-03 | Not significant |
| 369 | GCST90003055 | aparc-a2009s rh volume S-oc-middle+Lunatus | 1.4796E-01 | 5.8683E-03 | Not significant |
| 370 | GCST90004215 | IDP dMRI TBSS L3 Uncinate fasciculus R | 1.4955E-01 | 5.8842E-03 | Not significant |
| 371 | GCST90004219 | IDP dMRI ProbtrackX MD ar l | 1.4970E-01 | 5.9001E-03 | Not significant |
| 372 | GCST90004432 | IDP dMRI TBSS OD Sagittal stratum R | 1.5006E-01 | 5.9160E-03 | Not significant |
| 373 | GCST90005771 | rfMRI connectivity (ICA100 edge 918) | 1.5011E-01 | 5.9319E-03 | Not significant |
| 374 | GCST90004403 | IDP dMRI TBSS OD Pontine crossing tract | 1.5063E-01 | 5.9478E-03 | Not significant |
| 375 | GCST90004261 | IDP dMRI ProbtrackX L1 ilf r | 1.5067E-01 | 5.9637E-03 | Not significant |
| 376 | GCST90004446 | IDP dMRI TBSS OD Uncinate fasciculus R | 1.5074E-01 | 5.9796E-03 | Not significant |
| 377 | GCST90005551 | rfMRI connectivity (ICA100 edge 698) | 1.5093E-01 | 5.9955E-03 | Not significant |
| 378 | GCST90003150 | aparc-pial lh area isthmuscingulate | 1.5095E-01 | 6.0115E-03 | Not significant |
| 379 | GCST90004820 | rfMRI connectivity (ICA25 edge 177) | 1.5192E-01 | 6.0274E-03 | Not significant |
| 380 | GCST90003508 | aparc-Desikan rh thickness superiortemporal | 1.5216E-01 | 6.0433E-03 | Not significant |
| 381 | GCST90004489 | IDP dMRI TBSS ISOVF Superior cerebellar peduncle R | 1.5221E-01 | 6.0592E-03 | Not significant |
| 382 | GCST90003066 | aparc-a2009s rh volume S-precentral-inf-part | 1.5240E-01 | 6.0751E-03 | Not significant |
| 383 | GCST90004308 | IDP dMRI ProbtrackX L3 cst l | 1.5288E-01 | 6.0910E-03 | Not significant |
| 384 | GCST90004228 | IDP dMRI ProbtrackX MD cst r | 1.5331E-01 | 6.1069E-03 | Not significant |
| 385 | GCST90004309 | IDP dMRI ProbtrackX L3 cst r | 1.5416E-01 | 6.1228E-03 | Not significant |
| 386 | GCST90003273 | aparc-DKTatlas rh area isthmuscingulate | 1.5431E-01 | 6.1387E-03 | Not significant |
| 387 | GCST90005749 | rfMRI connectivity (ICA100 edge 896) | 1.5511E-01 | 6.1546E-03 | Not significant |
| 388 | GCST90004511 | IDP dMRI TBSS ISOVF Cingulum cingulate gyrus R | 1.5540E-01 | 6.1705E-03 | Not significant |
| 389 | GCST90005444 | rfMRI connectivity (ICA100 edge 591) | 1.5549E-01 | 6.1864E-03 | Not significant |
| 390 | GCST90002959 | aparc-a2009s lh volume G-temp-sup-Plan-polar | 1.5550E-01 | 6.2023E-03 | Not significant |
| 391 | GCST90004582 | rfMRI amplitudes (ICA25 node 15) | 1.5555E-01 | 6.2182E-03 | Not significant |
| 392 | GCST90003381 | aparc-a2009s rh area G-cuneus | 1.5586E-01 | 6.2341E-03 | Not significant |
| 393 | GCST90005475 | rfMRI connectivity (ICA100 edge 622) | 1.5617E-01 | 6.2500E-03 | Not significant |
| 394 | GCST90005050 | rfMRI connectivity (ICA100 edge 197) | 1.5626E-01 | 6.2659E-03 | Not significant |
| 395 | GCST90003130 | aparc-Desikan rh area precentral | 1.5690E-01 | 6.2818E-03 | Not significant |
| 396 | GCST90004326 | IDP dMRI ProbtrackX L3 unc r | 1.5707E-01 | 6.2977E-03 | Not significant |
| 397 | GCST90006064 | rfMRI connectivity (ICA100 edge 1211) | 1.5707E-01 | 6.3136E-03 | Not significant |
| 398 | GCST90005670 | rfMRI connectivity (ICA100 edge 817) | 1.5764E-01 | 6.3295E-03 | Not significant |
| 399 | GCST90003371 | aparc-a2009s rh area G+S-frontomargin | 1.5788E-01 | 6.3454E-03 | Not significant |
| 400 | GCST90003462 | aparc-Desikan lh thickness parsopercularis | 1.5796E-01 | 6.3613E-03 | Not significant |
| 401 | GCST90003233 | BA-exvivo rh area perirhinal | 1.5799E-01 | 6.3772E-03 | Not significant |
| 402 | GCST90004359 | IDP dMRI TBSS ICVF External capsule R | 1.5804E-01 | 6.3931E-03 | Not significant |
| 403 | GCST90006194 | rfMRI connectivity (ICA100 edge 1341) | 1.5814E-01 | 6.4090E-03 | Not significant |
| 404 | GCST90004756 | rfMRI connectivity (ICA25 edge 113) | 1.5816E-01 | 6.4249E-03 | Not significant |
| 405 | GCST90005675 | rfMRI connectivity (ICA100 edge 822) | 1.5826E-01 | 6.4408E-03 | Not significant |
| 406 | GCST90004722 | rfMRI connectivity (ICA25 edge 79) | 1.5840E-01 | 6.4567E-03 | Not significant |
| 407 | GCST90003892 | IDP dMRI TBSS FA Cerebral peduncle L | 1.5892E-01 | 6.4726E-03 | Not significant |
| 408 | GCST90004164 | IDP dMRI TBSS L2 Superior longitudinal fasciculus L | 1.5908E-01 | 6.4885E-03 | Not significant |
| 409 | GCST90006337 | rfMRI connectivity (ICA100 edge 1484) | 1.5956E-01 | 6.5045E-03 | Not significant |
| 410 | GCST90004354 | IDP dMRI TBSS ICVF Posterior corona radiata L | 1.5981E-01 | 6.5204E-03 | Not significant |
| 411 | GCST90005509 | rfMRI connectivity (ICA100 edge 656) | 1.6009E-01 | 6.5363E-03 | Not significant |
| 412 | GCST90002666 | AmygNuclei rh volume Paralaminar-nucleus | 1.6010E-01 | 6.5522E-03 | Not significant |
| 413 | GCST90003817 | wg lh intensity-contrast rostralanteriorcingulate | 1.6050E-01 | 6.5681E-03 | Not significant |
| 414 | GCST90004222 | IDP dMRI ProbtrackX MD atr r | 1.6054E-01 | 6.5840E-03 | Not significant |
| 415 | GCST90005042 | rfMRI connectivity (ICA100 edge 189) | 1.6059E-01 | 6.5999E-03 | Not significant |
| 416 | GCST90002938 | aparc-a2009s lh volume G-front-inf-Triangul | 1.6103E-01 | 6.6158E-03 | Not significant |
| 417 | GCST90005277 | rfMRI connectivity (ICA100 edge 424) | 1.6164E-01 | 6.6317E-03 | Not significant |
| 418 | GCST90004026 | IDP dMRI ProbtrackX MO unc r | 1.6212E-01 | 6.6476E-03 | Not significant |
| 419 | GCST90005681 | rfMRI connectivity (ICA100 edge 828) | 1.6227E-01 | 6.6635E-03 | Not significant |
| 420 | GCST90005088 | rfMRI connectivity (ICA100 edge 235) | 1.6260E-01 | 6.6794E-03 | Not significant |
| 421 | GCST90003793 | wg lh intensity-contrast bankssts | 1.6260E-01 | 6.6953E-03 | Not significant |
| 422 | GCST90002997 | aparc-a2009s lh volume S-temporal-sup | 1.6280E-01 | 6.7112E-03 | Not significant |
| 423 | GCST90005473 | rfMRI connectivity (ICA100 edge 620) | 1.6281E-01 | 6.7271E-03 | Not significant |
| 424 | GCST90006011 | rfMRI connectivity (ICA100 edge 1158) | 1.6296E-01 | 6.7430E-03 | Not significant |
| 425 | GCST90005104 | rfMRI connectivity (ICA100 edge 251) | 1.6313E-01 | 6.7589E-03 | Not significant |
| 426 | GCST90004973 | rfMRI connectivity (ICA100 edge 120) | 1.6349E-01 | 6.7748E-03 | Not significant |
| 427 | GCST90005648 | rfMRI connectivity (ICA100 edge 795) | 1.6373E-01 | 6.7907E-03 | Not significant |
| 428 | GCST90002936 | aparc-a2009s lh volume G-front-inf-Opercular | 1.6488E-01 | 6.8066E-03 | Not significant |
| 429 | GCST90004594 | rfMRI amplitudes (ICA100 node 6) | 1.6542E-01 | 6.8225E-03 | Not significant |
| 430 | GCST90006327 | rfMRI connectivity (ICA100 edge 1474) | 1.6557E-01 | 6.8384E-03 | Not significant |
| 431 | GCST90005260 | rfMRI connectivity (ICA100 edge 407) | 1.6559E-01 | 6.8543E-03 | Not significant |
| 432 | GCST90005819 | rfMRI connectivity (ICA100 edge 966) | 1.6579E-01 | 6.8702E-03 | Not significant |
| 433 | GCST90002927 | aparc-a2009s lh volume G+S-paracentral | 1.6602E-01 | 6.8861E-03 | Not significant |
| 434 | GCST90006353 | QC rfMRI-to-T1 linear alignment discrepancy | 1.6606E-01 | 6.9020E-03 | Not significant |
| 435 | GCST90006110 | rfMRI connectivity (ICA100 edge 1257) | 1.6626E-01 | 6.9179E-03 | Not significant |
| 436 | GCST90005742 | rfMRI connectivity (ICA100 edge 889) | 1.6636E-01 | 6.9338E-03 | Not significant |
| 437 | GCST90004762 | rfMRI connectivity (ICA25 edge 119) | 1.6641E-01 | 6.9497E-03 | Not significant |
| 438 | GCST90004686 | rfMRI connectivity (ICA25 edge 43) | 1.6641E-01 | 6.9656E-03 | Not significant |
| 439 | GCST90003513 | BA-exvivo lh thickness BA1 | 1.6676E-01 | 6.9816E-03 | Not significant |
| 440 | GCST90003322 | aparc-a2009s lh area G-pariet-inf-Supramar | 1.6678E-01 | 6.9975E-03 | Not significant |
| 441 | GCST90005061 | rfMRI connectivity (ICA100 edge 208) | 1.6710E-01 | 7.0134E-03 | Not significant |
| 442 | GCST90004149 | IDP dMRI TBSS L2 Posterior corona radiata R | 1.6719E-01 | 7.0293E-03 | Not significant |
| 443 | GCST90003349 | aparc-a2009s lh area S-front-middle | 1.6744E-01 | 7.0452E-03 | Not significant |
| 444 | GCST90004588 | rfMRI amplitudes (ICA25 node 21) | 1.6766E-01 | 7.0611E-03 | Not significant |
| 445 | GCST90005291 | rfMRI connectivity (ICA100 edge 438) | 1.6785E-01 | 7.0770E-03 | Not significant |
| 446 | GCST90002801 | aparc-Desikan lh volume insula | 1.6792E-01 | 7.0929E-03 | Not significant |
| 447 | GCST90003852 | wg rh intensity-contrast rostralanteriorcingulate | 1.6802E-01 | 7.1088E-03 | Not significant |
| 448 | GCST90004568 | rfMRI amplitudes (ICA25 node 1) | 1.6808E-01 | 7.1247E-03 | Not significant |
| 449 | GCST90004497 | IDP dMRI TBSS ISOVF Retrolenticular part of internal capsule R | 1.6828E-01 | 7.1406E-03 | Not significant |
| 450 | GCST90004966 | rfMRI connectivity (ICA100 edge 113) | 1.6828E-01 | 7.1565E-03 | Not significant |
| 451 | GCST90005632 | rfMRI connectivity (ICA100 edge 779) | 1.6831E-01 | 7.1724E-03 | Not significant |
| 452 | GCST90003156 | aparc-pial lh area parahippocampal | 1.6836E-01 | 7.1883E-03 | Not significant |
| 453 | GCST90006144 | rfMRI connectivity (ICA100 edge 1291) | 1.6859E-01 | 7.2042E-03 | Not significant |
| 454 | GCST90003982 | IDP dMRI TBSS MO Sagittal stratum R | 1.6860E-01 | 7.2201E-03 | Not significant |
| 455 | GCST90003046 | aparc-a2009s rh volume S-circular-insula-inf | 1.6869E-01 | 7.2360E-03 | Not significant |
| 456 | GCST90002737 | ThalamNuclei rh volume MGN | 1.6870E-01 | 7.2519E-03 | Not significant |
| 457 | GCST90004004 | IDP dMRI ProbtrackX MO cgc l | 1.6936E-01 | 7.2678E-03 | Not significant |
| 458 | GCST90004907 | rfMRI connectivity (ICA100 edge 54) | 1.6992E-01 | 7.2837E-03 | Not significant |
| 459 | GCST90003924 | IDP dMRI TBSS FA Tapetum L | 1.7082E-01 | 7.2996E-03 | Not significant |
| 460 | GCST90003744 | aparc-a2009s rh thickness S-precentral-inf-part | 1.7112E-01 | 7.3155E-03 | Not significant |
| 461 | GCST90006351 | QC dMRI-to-T1 linear alignment discrepancy | 1.7128E-01 | 7.3314E-03 | Not significant |
| 462 | GCST90004865 | rfMRI connectivity (ICA100 edge 12) | 1.7145E-01 | 7.3473E-03 | Not significant |
| 463 | GCST90006210 | rfMRI connectivity (ICA100 edge 1357) | 1.7206E-01 | 7.3632E-03 | Not significant |
| 464 | GCST90005041 | rfMRI connectivity (ICA100 edge 188) | 1.7206E-01 | 7.3791E-03 | Not significant |
| 465 | GCST90003921 | IDP dMRI TBSS FA Uncinate fasciculus R | 1.7235E-01 | 7.3950E-03 | Not significant |
| 466 | GCST90002687 | HippSubfield lh volume Whole-hippocampal-body | 1.7239E-01 | 7.4109E-03 | Not significant |
| 467 | GCST90003192 | aparc-pial rh area parsorbitalis | 1.7330E-01 | 7.4268E-03 | Not significant |
| 468 | GCST90002926 | aparc-a2009s lh volume G+S-occipital-inf | 1.7332E-01 | 7.4427E-03 | Not significant |
| 469 | GCST90002584 | IDP T1 FAST ROIs L cerebellum IX | 1.7345E-01 | 7.4587E-03 | Not significant |
| 470 | GCST90004156 | IDP dMRI TBSS L2 External capsule L | 1.7385E-01 | 7.4746E-03 | Not significant |
| 471 | GCST90005804 | rfMRI connectivity (ICA100 edge 951) | 1.7397E-01 | 7.4905E-03 | Not significant |
| 472 | GCST90002526 | IDP T1 FAST ROIs R temp fusif cortex post | 1.7407E-01 | 7.5064E-03 | Not significant |
| 473 | GCST90004997 | rfMRI connectivity (ICA100 edge 144) | 1.7422E-01 | 7.5223E-03 | Not significant |
| 474 | GCST90003638 | aparc-a2009s lh thickness G-temp-sup-Plan-tempo | 1.7425E-01 | 7.5382E-03 | Not significant |
| 475 | GCST90004784 | rfMRI connectivity (ICA25 edge 141) | 1.7431E-01 | 7.5541E-03 | Not significant |
| 476 | GCST90003443 | aparc-a2009s rh area S-temporal-sup | 1.7440E-01 | 7.5700E-03 | Not significant |
| 477 | GCST90003009 | aparc-a2009s rh volume G-cuneus | 1.7465E-01 | 7.5859E-03 | Not significant |
| 478 | GCST90005745 | rfMRI connectivity (ICA100 edge 892) | 1.7490E-01 | 7.6018E-03 | Not significant |
| 479 | GCST90004747 | rfMRI connectivity (ICA25 edge 104) | 1.7494E-01 | 7.6177E-03 | Not significant |
| 480 | GCST90004745 | rfMRI connectivity (ICA25 edge 102) | 1.7504E-01 | 7.6336E-03 | Not significant |
| 481 | GCST90003327 | aparc-a2009s lh area G-rectus | 1.7507E-01 | 7.6495E-03 | Not significant |
| 482 | GCST90004329 | IDP dMRI TBSS ICVF Genu of corpus callosum | 1.7615E-01 | 7.6654E-03 | Not significant |
| 483 | GCST90006115 | rfMRI connectivity (ICA100 edge 1262) | 1.7615E-01 | 7.6813E-03 | Not significant |
| 484 | GCST90002456 | IDP T1 FAST ROIs R sup front gyrus | 1.7637E-01 | 7.6972E-03 | Not significant |
| 485 | GCST90004225 | IDP dMRI ProbtrackX MD cgh l | 1.7640E-01 | 7.7131E-03 | Not significant |
| 486 | GCST90006121 | rfMRI connectivity (ICA100 edge 1268) | 1.7656E-01 | 7.7290E-03 | Not significant |
| 487 | GCST90004760 | rfMRI connectivity (ICA25 edge 117) | 1.7670E-01 | 7.7449E-03 | Not significant |
| 488 | GCST90003586 | aparc-DKTatlas rh thickness paracentral | 1.7718E-01 | 7.7608E-03 | Not significant |
| 489 | GCST90003871 | IDP SWI T2star left hippocampus | 1.7742E-01 | 7.7767E-03 | Not significant |
| 490 | GCST90002795 | aparc-Desikan lh volume superiorfrontal | 1.7816E-01 | 7.7926E-03 | Not significant |
| 491 | GCST90005912 | rfMRI connectivity (ICA100 edge 1059) | 1.7868E-01 | 7.8085E-03 | Not significant |
| 492 | GCST90003124 | aparc-Desikan rh area parsopercularis | 1.7929E-01 | 7.8244E-03 | Not significant |
| 493 | GCST90004369 | IDP dMRI TBSS ICVF Superior fronto-occipital fasciculus R | 1.7933E-01 | 7.8403E-03 | Not significant |
| 494 | GCST90002555 | IDP T1 FAST ROIs L hippocampus | 1.7993E-01 | 7.8562E-03 | Not significant |
| 495 | GCST90005606 | rfMRI connectivity (ICA100 edge 753) | 1.8003E-01 | 7.8721E-03 | Not significant |
| 496 | GCST90002636 | aseg rh volume Cerebellum-Cortex | 1.8062E-01 | 7.8880E-03 | Not significant |
| 497 | GCST90004297 | IDP dMRI ProbtrackX L2 str r | 1.8071E-01 | 7.9039E-03 | Not significant |
| 498 | GCST90004507 | IDP dMRI TBSS ISOVF Sagittal stratum R | 1.8098E-01 | 7.9198E-03 | Not significant |
| 499 | GCST90004140 | IDP dMRI TBSS L2 Anterior limb of internal capsule L | 1.8103E-01 | 7.9358E-03 | Not significant |
| 500 | GCST90006020 | rfMRI connectivity (ICA100 edge 1167) | 1.8126E-01 | 7.9517E-03 | Not significant |
| 501 | GCST90005861 | rfMRI connectivity (ICA100 edge 1008) | 1.8148E-01 | 7.9676E-03 | Not significant |
| 502 | GCST90005235 | rfMRI connectivity (ICA100 edge 382) | 1.8191E-01 | 7.9835E-03 | Not significant |
| 503 | GCST90005699 | rfMRI connectivity (ICA100 edge 846) | 1.8195E-01 | 7.9994E-03 | Not significant |
| 504 | GCST90002823 | aparc-Desikan rh volume posteriorcingulate | 1.8197E-01 | 8.0153E-03 | Not significant |
| 505 | GCST90003425 | aparc-a2009s rh area S-interm-prim-Jensen | 1.8202E-01 | 8.0312E-03 | Not significant |
| 506 | GCST90004580 | rfMRI amplitudes (ICA25 node 13) | 1.8213E-01 | 8.0471E-03 | Not significant |
| 507 | GCST90005828 | rfMRI connectivity (ICA100 edge 975) | 1.8259E-01 | 8.0630E-03 | Not significant |
| 508 | GCST90005871 | rfMRI connectivity (ICA100 edge 1018) | 1.8282E-01 | 8.0789E-03 | Not significant |
| 509 | GCST90003975 | IDP dMRI TBSS MO Anterior corona radiata L | 1.8322E-01 | 8.0948E-03 | Not significant |
| 510 | GCST90004390 | IDP dMRI ProbtrackX ICVF ilf r | 1.8355E-01 | 8.1107E-03 | Not significant |
| 511 | GCST90005469 | rfMRI connectivity (ICA100 edge 616) | 1.8361E-01 | 8.1266E-03 | Not significant |
| 512 | GCST90002658 | AmygNuclei rh volume Lateral-nucleus | 1.8363E-01 | 8.1425E-03 | Not significant |
| 513 | GCST90005992 | rfMRI connectivity (ICA100 edge 1139) | 1.8420E-01 | 8.1584E-03 | Not significant |
| 514 | GCST90002810 | aparc-Desikan rh volume isthmuscingulate | 1.8420E-01 | 8.1743E-03 | Not significant |
| 515 | GCST90005932 | rfMRI connectivity (ICA100 edge 1079) | 1.8430E-01 | 8.1902E-03 | Not significant |
| 516 | GCST90005436 | rfMRI connectivity (ICA100 edge 583) | 1.8444E-01 | 8.2061E-03 | Not significant |
| 517 | GCST90004674 | rfMRI connectivity (ICA25 edge 31) | 1.8445E-01 | 8.2220E-03 | Not significant |
| 518 | GCST90005677 | rfMRI connectivity (ICA100 edge 824) | 1.8455E-01 | 8.2379E-03 | Not significant |
| 519 | GCST90004637 | rfMRI amplitudes (ICA100 node 49) | 1.8494E-01 | 8.2538E-03 | Not significant |
| 520 | GCST90004288 | IDP dMRI ProbtrackX L2 ilf r | 1.8494E-01 | 8.2697E-03 | Not significant |
| 521 | GCST90004759 | rfMRI connectivity (ICA25 edge 116) | 1.8506E-01 | 8.2856E-03 | Not significant |
| 522 | GCST90003227 | BA-exvivo rh area BA6 | 1.8510E-01 | 8.3015E-03 | Not significant |
| 523 | GCST90004406 | IDP dMRI TBSS OD Splenium of corpus callosum | 1.8511E-01 | 8.3174E-03 | Not significant |
| 524 | GCST90003731 | aparc-a2009s rh thickness S-interm-prim-Jensen | 1.8515E-01 | 8.3333E-03 | Not significant |
| 525 | GCST90003663 | aparc-a2009s lh thickness S-oc-temp-med+Lingual | 1.8527E-01 | 8.3492E-03 | Not significant |
| 526 | GCST90004370 | IDP dMRI TBSS ICVF Superior fronto-occipital fasciculus L | 1.8535E-01 | 8.3651E-03 | Not significant |
| 527 | GCST90004856 | rfMRI connectivity (ICA100 edge 3) | 1.8569E-01 | 8.3810E-03 | Not significant |
| 528 | GCST90006263 | rfMRI connectivity (ICA100 edge 1410) | 1.8605E-01 | 8.3969E-03 | Not significant |
| 529 | GCST90002571 | IDP T1 FAST ROIs R cerebellum crus I | 1.8609E-01 | 8.4128E-03 | Not significant |
| 530 | GCST90004064 | IDP dMRI TBSS MD Cingulum hippocampus L | 1.8613E-01 | 8.4288E-03 | Not significant |
| 531 | GCST90004790 | rfMRI connectivity (ICA25 edge 147) | 1.8625E-01 | 8.4447E-03 | Not significant |
| 532 | GCST90005491 | rfMRI connectivity (ICA100 edge 638) | 1.8642E-01 | 8.4606E-03 | Not significant |
| 533 | GCST90005711 | rfMRI connectivity (ICA100 edge 858) | 1.8701E-01 | 8.4765E-03 | Not significant |
| 534 | GCST90004542 | IDP dMRI ProbtrackX ISOVF ml l | 1.8709E-01 | 8.4924E-03 | Not significant |
| 535 | GCST90004449 | IDP dMRI TBSS OD Tapetum L | 1.8724E-01 | 8.5083E-03 | Not significant |
| 536 | GCST90004185 | IDP dMRI TBSS L3 Cerebral peduncle R | 1.8734E-01 | 8.5242E-03 | Not significant |
| 537 | GCST90005300 | rfMRI connectivity (ICA100 edge 447) | 1.8756E-01 | 8.5401E-03 | Not significant |
| 538 | GCST90003317 | aparc-a2009s lh area G-oc-temp-lat-fusifor | 1.8801E-01 | 8.5560E-03 | Not significant |
| 539 | GCST90004049 | IDP dMRI TBSS MD Anterior corona radiata R | 1.8822E-01 | 8.5719E-03 | Not significant |
| 540 | GCST90004850 | rfMRI connectivity (ICA25 edge 207) | 1.8826E-01 | 8.5878E-03 | Not significant |
| 541 | GCST90004803 | rfMRI connectivity (ICA25 edge 160) | 1.8839E-01 | 8.6037E-03 | Not significant |
| 542 | GCST90004377 | IDP dMRI ProbtrackX ICVF atr l | 1.8843E-01 | 8.6196E-03 | Not significant |
| 543 | GCST90006328 | rfMRI connectivity (ICA100 edge 1475) | 1.8846E-01 | 8.6355E-03 | Not significant |
| 544 | GCST90003699 | aparc-a2009s rh thickness G-oc-temp-med-Parahip | 1.8846E-01 | 8.6514E-03 | Not significant |
| 545 | GCST90005410 | rfMRI connectivity (ICA100 edge 557) | 1.8906E-01 | 8.6673E-03 | Not significant |
| 546 | GCST90005658 | rfMRI connectivity (ICA100 edge 805) | 1.8929E-01 | 8.6832E-03 | Not significant |
| 547 | GCST90004810 | rfMRI connectivity (ICA25 edge 167) | 1.8948E-01 | 8.6991E-03 | Not significant |
| 548 | GCST90002854 | BA-exvivo rh volume BA4p | 1.8957E-01 | 8.7150E-03 | Not significant |
| 549 | GCST90005885 | rfMRI connectivity (ICA100 edge 1032) | 1.8961E-01 | 8.7309E-03 | Not significant |
| 550 | GCST90004827 | rfMRI connectivity (ICA25 edge 184) | 1.8974E-01 | 8.7468E-03 | Not significant |
| 551 | GCST90004861 | rfMRI connectivity (ICA100 edge 8) | 1.8993E-01 | 8.7627E-03 | Not significant |
| 552 | GCST90005667 | rfMRI connectivity (ICA100 edge 814) | 1.9033E-01 | 8.7786E-03 | Not significant |
| 553 | GCST90005127 | rfMRI connectivity (ICA100 edge 274) | 1.9045E-01 | 8.7945E-03 | Not significant |
| 554 | GCST90002543 | IDP T1 FAST ROIs L supracalc cortex | 1.9071E-01 | 8.8104E-03 | Not significant |
| 555 | GCST90004238 | IDP dMRI ProbtrackX MD ptr l | 1.9099E-01 | 8.8263E-03 | Not significant |
| 556 | GCST90006352 | QC SWI-to-T1 linear alignment discrepancy | 1.9135E-01 | 8.8422E-03 | Not significant |
| 557 | GCST90002888 | aparc-DKTatlas lh volume superiorfrontal | 1.9158E-01 | 8.8581E-03 | Not significant |
| 558 | GCST90003359 | aparc-a2009s lh area S-orbital-med-olfact | 1.9159E-01 | 8.8740E-03 | Not significant |
| 559 | GCST90005904 | rfMRI connectivity (ICA100 edge 1051) | 1.9164E-01 | 8.8899E-03 | Not significant |
| 560 | GCST90003016 | aparc-a2009s rh volume G-insular-short | 1.9194E-01 | 8.9059E-03 | Not significant |
| 561 | GCST90003128 | aparc-Desikan rh area postcentral | 1.9240E-01 | 8.9218E-03 | Not significant |
| 562 | GCST90004761 | rfMRI connectivity (ICA25 edge 118) | 1.9248E-01 | 8.9377E-03 | Not significant |
| 563 | GCST90002559 | IDP T1 FAST ROIs L ventral striatum | 1.9624E-01 | 8.9536E-03 | Not significant |
| 564 | GCST90005341 | rfMRI connectivity (ICA100 edge 488) | 1.9625E-01 | 8.9695E-03 | Not significant |
| 565 | GCST90006325 | rfMRI connectivity (ICA100 edge 1472) | 1.9649E-01 | 8.9854E-03 | Not significant |
| 566 | GCST90005952 | rfMRI connectivity (ICA100 edge 1099) | 1.9713E-01 | 9.0013E-03 | Not significant |
| 567 | GCST90005615 | rfMRI connectivity (ICA100 edge 762) | 1.9737E-01 | 9.0172E-03 | Not significant |
| 568 | GCST90004174 | IDP dMRI TBSS L3 Body of corpus callosum | 1.9749E-01 | 9.0331E-03 | Not significant |
| 569 | GCST90006256 | rfMRI connectivity (ICA100 edge 1403) | 1.9764E-01 | 9.0490E-03 | Not significant |
| 570 | GCST90003974 | IDP dMRI TBSS MO Anterior corona radiata R | 1.9780E-01 | 9.0649E-03 | Not significant |
| 571 | GCST90005800 | rfMRI connectivity (ICA100 edge 947) | 1.9825E-01 | 9.0808E-03 | Not significant |
| 572 | GCST90004400 | IDP dMRI ProbtrackX ICVF unc l | 1.9870E-01 | 9.0967E-03 | Not significant |
| 573 | GCST90005815 | rfMRI connectivity (ICA100 edge 962) | 1.9881E-01 | 9.1126E-03 | Not significant |
| 574 | GCST90002657 | AmygNuclei lh volume Whole-amygdala | 1.9895E-01 | 9.1285E-03 | Not significant |
| 575 | GCST90005663 | rfMRI connectivity (ICA100 edge 810) | 1.9910E-01 | 9.1444E-03 | Not significant |
| 576 | GCST90002488 | IDP T1 FAST ROIs R supramarg gyrus ant | 1.9951E-01 | 9.1603E-03 | Not significant |
| 577 | GCST90004106 | IDP dMRI TBSS L1 Sagittal stratum L | 1.9964E-01 | 9.1762E-03 | Not significant |
| 578 | GCST90005013 | rfMRI connectivity (ICA100 edge 160) | 1.9969E-01 | 9.1921E-03 | Not significant |
| 579 | GCST90006179 | rfMRI connectivity (ICA100 edge 1326) | 1.9979E-01 | 9.2080E-03 | Not significant |
| 580 | GCST90004237 | IDP dMRI ProbtrackX MD ml r | 1.9992E-01 | 9.2239E-03 | Not significant |
| 581 | GCST90006217 | rfMRI connectivity (ICA100 edge 1364) | 2.0017E-01 | 9.2398E-03 | Not significant |
| 582 | GCST90002957 | aparc-a2009s lh volume G-temp-sup-G-T-transv | 2.0029E-01 | 9.2557E-03 | Not significant |
| 583 | GCST90004924 | rfMRI connectivity (ICA100 edge 71) | 2.0034E-01 | 9.2716E-03 | Not significant |
| 584 | GCST90006004 | rfMRI connectivity (ICA100 edge 1151) | 2.0146E-01 | 9.2875E-03 | Not significant |
| 585 | GCST90006243 | rfMRI connectivity (ICA100 edge 1390) | 2.0148E-01 | 9.3034E-03 | Not significant |
| 586 | GCST90003303 | aparc-a2009s lh area G+S-cingul-Mid-Ant | 2.0167E-01 | 9.3193E-03 | Not significant |
| 587 | GCST90005637 | rfMRI connectivity (ICA100 edge 784) | 2.0173E-01 | 9.3352E-03 | Not significant |
| 588 | GCST90005010 | rfMRI connectivity (ICA100 edge 157) | 2.0175E-01 | 9.3511E-03 | Not significant |
| 589 | GCST90003341 | aparc-a2009s lh area S-central | 2.0183E-01 | 9.3670E-03 | Not significant |
| 590 | GCST90002743 | ThalamNuclei rh volume VLa | 2.0216E-01 | 9.3830E-03 | Not significant |
| 591 | GCST90004512 | IDP dMRI TBSS ISOVF Cingulum cingulate gyrus L | 2.0245E-01 | 9.3989E-03 | Not significant |
| 592 | GCST90003649 | aparc-a2009s lh thickness S-circular-insula-ant | 2.0261E-01 | 9.4148E-03 | Not significant |
| 593 | GCST90005966 | rfMRI connectivity (ICA100 edge 1113) | 2.0309E-01 | 9.4307E-03 | Not significant |
| 594 | GCST90003311 | aparc-a2009s lh area G-front-middle | 2.0346E-01 | 9.4466E-03 | Not significant |
| 595 | GCST90005656 | rfMRI connectivity (ICA100 edge 803) | 2.0366E-01 | 9.4625E-03 | Not significant |
| 596 | GCST90004110 | IDP dMRI TBSS L1 Cingulum cingulate gyrus L | 2.0382E-01 | 9.4784E-03 | Not significant |
| 597 | GCST90006272 | rfMRI connectivity (ICA100 edge 1419) | 2.0416E-01 | 9.4943E-03 | Not significant |
| 598 | GCST90005523 | rfMRI connectivity (ICA100 edge 670) | 2.0425E-01 | 9.5102E-03 | Not significant |
| 599 | GCST90003898 | IDP dMRI TBSS FA Retrolenticular part of internal capsule L | 2.0451E-01 | 9.5261E-03 | Not significant |
| 600 | GCST90004224 | IDP dMRI ProbtrackX MD cgc r | 2.0483E-01 | 9.5420E-03 | Not significant |
| 601 | GCST90006199 | rfMRI connectivity (ICA100 edge 1346) | 2.0491E-01 | 9.5579E-03 | Not significant |
| 602 | GCST90005524 | rfMRI connectivity (ICA100 edge 671) | 2.0506E-01 | 9.5738E-03 | Not significant |
| 603 | GCST90005850 | rfMRI connectivity (ICA100 edge 997) | 2.0612E-01 | 9.5897E-03 | Not significant |
| 604 | GCST90004870 | rfMRI connectivity (ICA100 edge 17) | 2.0645E-01 | 9.6056E-03 | Not significant |
| 605 | GCST90003044 | aparc-a2009s rh volume S-cingul-Marginalis | 2.0715E-01 | 9.6215E-03 | Not significant |
| 606 | GCST90006008 | rfMRI connectivity (ICA100 edge 1155) | 2.0725E-01 | 9.6374E-03 | Not significant |
| 607 | GCST90002709 | HippSubfield rh volume Whole-hippocampal-body | 2.0740E-01 | 9.6533E-03 | Not significant |
| 608 | GCST90004545 | IDP dMRI ProbtrackX ISOVF ptr r | 2.0743E-01 | 9.6692E-03 | Not significant |
| 609 | GCST90004895 | rfMRI connectivity (ICA100 edge 42) | 2.0776E-01 | 9.6851E-03 | Not significant |
| 610 | GCST90004336 | IDP dMRI TBSS ICVF Medial lemniscus L | 2.0783E-01 | 9.7010E-03 | Not significant |
| 611 | GCST90002698 | HippSubfield rh volume parasubiculum | 2.0814E-01 | 9.7169E-03 | Not significant |
| 612 | GCST90004565 | IDP tfMRI 90th-percentile BOLD faces-shapes amygdala | 2.0818E-01 | 9.7328E-03 | Not significant |
| 613 | GCST90005718 | rfMRI connectivity (ICA100 edge 865) | 2.0835E-01 | 9.7487E-03 | Not significant |
| 614 | GCST90005085 | rfMRI connectivity (ICA100 edge 232) | 2.0840E-01 | 9.7646E-03 | Not significant |
| 615 | GCST90004763 | rfMRI connectivity (ICA25 edge 120) | 2.0881E-01 | 9.7805E-03 | Not significant |
| 616 | GCST90004882 | rfMRI connectivity (ICA100 edge 29) | 2.0904E-01 | 9.7964E-03 | Not significant |
| 617 | GCST90003077 | aparc-Desikan lh area cuneus | 2.0919E-01 | 9.8123E-03 | Not significant |
| 618 | GCST90003137 | aparc-Desikan rh area supramarginal | 2.0935E-01 | 9.8282E-03 | Not significant |
| 619 | GCST90003968 | IDP dMRI TBSS MO Anterior limb of internal capsule R | 2.0941E-01 | 9.8441E-03 | Not significant |
| 620 | GCST90005383 | rfMRI connectivity (ICA100 edge 530) | 2.0995E-01 | 9.8601E-03 | Not significant |
| 621 | GCST90005399 | rfMRI connectivity (ICA100 edge 546) | 2.0999E-01 | 9.8760E-03 | Not significant |
| 622 | GCST90003063 | aparc-a2009s rh volume S-parieto-occipital | 2.1005E-01 | 9.8919E-03 | Not significant |
| 623 | GCST90004698 | rfMRI connectivity (ICA25 edge 55) | 2.1041E-01 | 9.9078E-03 | Not significant |
| 624 | GCST90005427 | rfMRI connectivity (ICA100 edge 574) | 2.1080E-01 | 9.9237E-03 | Not significant |
| 625 | GCST90004397 | IDP dMRI ProbtrackX ICVF slf r | 2.1105E-01 | 9.9396E-03 | Not significant |
| 626 | GCST90004647 | rfMRI connectivity (ICA25 edge 4) | 2.1185E-01 | 9.9555E-03 | Not significant |
| 627 | GCST90005274 | rfMRI connectivity (ICA100 edge 421) | 2.1197E-01 | 9.9714E-03 | Not significant |
| 628 | GCST90005655 | rfMRI connectivity (ICA100 edge 802) | 2.1201E-01 | 9.9873E-03 | Not significant |
| 629 | GCST90004097 | IDP dMRI TBSS L1 Anterior corona radiata R | 2.1291E-01 | 1.0003E-02 | Not significant |
| 630 | GCST90006024 | rfMRI connectivity (ICA100 edge 1171) | 2.1302E-01 | 1.0019E-02 | Not significant |
| 631 | GCST90005759 | rfMRI connectivity (ICA100 edge 906) | 2.1312E-01 | 1.0035E-02 | Not significant |
| 632 | GCST90004540 | IDP dMRI ProbtrackX ISOVF ilf r | 2.1334E-01 | 1.0051E-02 | Not significant |
| 633 | GCST90004621 | rfMRI amplitudes (ICA100 node 33) | 2.1366E-01 | 1.0067E-02 | Not significant |
| 634 | GCST90004880 | rfMRI connectivity (ICA100 edge 27) | 2.1369E-01 | 1.0083E-02 | Not significant |
| 635 | GCST90004915 | rfMRI connectivity (ICA100 edge 62) | 2.1414E-01 | 1.0099E-02 | Not significant |
| 636 | GCST90003294 | aparc-DKTatlas rh area supramarginal | 2.1416E-01 | 1.0115E-02 | Not significant |
| 637 | GCST90006225 | rfMRI connectivity (ICA100 edge 1372) | 2.1434E-01 | 1.0130E-02 | Not significant |
| 638 | GCST90002574 | IDP T1 FAST ROIs R cerebellum crus II | 2.1467E-01 | 1.0146E-02 | Not significant |
| 639 | GCST90004556 | IDP tfMRI median BOLD faces | 2.1474E-01 | 1.0162E-02 | Not significant |
| 640 | GCST90004089 | IDP dMRI TBSS L1 Cerebral peduncle R | 2.1482E-01 | 1.0178E-02 | Not significant |
| 641 | GCST90004163 | IDP dMRI TBSS L2 Superior longitudinal fasciculus R | 2.1516E-01 | 1.0194E-02 | Not significant |
| 642 | GCST90004352 | IDP dMRI TBSS ICVF Superior corona radiata L | 2.1520E-01 | 1.0210E-02 | Not significant |
| 643 | GCST90003395 | aparc-a2009s rh area G-pariet-inf-Angular | 2.1546E-01 | 1.0226E-02 | Not significant |
| 644 | GCST90003499 | aparc-Desikan rh thickness pericalcarine | 2.1579E-01 | 1.0242E-02 | Not significant |
| 645 | GCST90005762 | rfMRI connectivity (ICA100 edge 909) | 2.1616E-01 | 1.0258E-02 | Not significant |
| 646 | GCST90003550 | aparc-DKTatlas lh thickness lateralorbitofrontal | 2.1634E-01 | 1.0274E-02 | Not significant |
| 647 | GCST90002924 | aparc-DKTatlas rh volume insula | 2.1659E-01 | 1.0289E-02 | Not significant |
| 648 | GCST90002551 | IDP T1 FAST ROIs L putamen | 2.1665E-01 | 1.0305E-02 | Not significant |
| 649 | GCST90003197 | aparc-pial rh area precentral | 2.1667E-01 | 1.0321E-02 | Not significant |
| 650 | GCST90004660 | rfMRI connectivity (ICA25 edge 17) | 2.1730E-01 | 1.0337E-02 | Not significant |
| 651 | GCST90004451 | IDP dMRI ProbtrackX OD ar r | 2.1769E-01 | 1.0353E-02 | Not significant |
| 652 | GCST90005112 | rfMRI connectivity (ICA100 edge 259) | 2.1797E-01 | 1.0369E-02 | Not significant |
| 653 | GCST90004190 | IDP dMRI TBSS L3 Posterior limb of internal capsule L | 2.1798E-01 | 1.0385E-02 | Not significant |
| 654 | GCST90006200 | rfMRI connectivity (ICA100 edge 1347) | 2.1844E-01 | 1.0401E-02 | Not significant |
| 655 | GCST90005243 | rfMRI connectivity (ICA100 edge 390) | 2.1875E-01 | 1.0417E-02 | Not significant |
| 656 | GCST90005622 | rfMRI connectivity (ICA100 edge 769) | 2.1880E-01 | 1.0433E-02 | Not significant |
| 657 | GCST90005568 | rfMRI connectivity (ICA100 edge 715) | 2.1885E-01 | 1.0448E-02 | Not significant |
| 658 | GCST90003226 | BA-exvivo rh area BA4p | 2.1886E-01 | 1.0464E-02 | Not significant |
| 659 | GCST90005653 | rfMRI connectivity (ICA100 edge 800) | 2.1931E-01 | 1.0480E-02 | Not significant |
| 660 | GCST90004980 | rfMRI connectivity (ICA100 edge 127) | 2.2008E-01 | 1.0496E-02 | Not significant |
| 661 | GCST90003517 | BA-exvivo lh thickness BA4a | 2.2020E-01 | 1.0512E-02 | Not significant |
| 662 | GCST90005974 | rfMRI connectivity (ICA100 edge 1121) | 2.2050E-01 | 1.0528E-02 | Not significant |
| 663 | GCST90003023 | aparc-a2009s rh volume G-pariet-inf-Angular | 2.2059E-01 | 1.0544E-02 | Not significant |
| 664 | GCST90003337 | aparc-a2009s lh area Lat-Fis-post | 2.2101E-01 | 1.0560E-02 | Not significant |
| 665 | GCST90005562 | rfMRI connectivity (ICA100 edge 709) | 2.2144E-01 | 1.0576E-02 | Not significant |
| 666 | GCST90003332 | aparc-a2009s lh area G-temp-sup-Plan-tempo | 2.2149E-01 | 1.0592E-02 | Not significant |
| 667 | GCST90005403 | rfMRI connectivity (ICA100 edge 550) | 2.2180E-01 | 1.0608E-02 | Not significant |
| 668 | GCST90005564 | rfMRI connectivity (ICA100 edge 711) | 2.2204E-01 | 1.0623E-02 | Not significant |
| 669 | GCST90002872 | aparc-DKTatlas lh volume lateralorbitofrontal | 2.2272E-01 | 1.0639E-02 | Not significant |
| 670 | GCST90003873 | IDP SWI T2star left amygdala | 2.2345E-01 | 1.0655E-02 | Not significant |
| 671 | GCST90003509 | aparc-Desikan rh thickness supramarginal | 2.2440E-01 | 1.0671E-02 | Not significant |
| 672 | GCST90003945 | IDP dMRI ProbtrackX FA ptr r | 2.2565E-01 | 1.0687E-02 | Not significant |
| 673 | GCST90003939 | IDP dMRI ProbtrackX FA ilf l | 2.2626E-01 | 1.0703E-02 | Not significant |
| 674 | GCST90003824 | wg lh intensity-contrast temporalpole | 2.2670E-01 | 1.0719E-02 | Not significant |
| 675 | GCST90004009 | IDP dMRI ProbtrackX MO cst r | 2.2692E-01 | 1.0735E-02 | Not significant |
| 676 | GCST90003166 | aparc-pial lh area rostralanteriorcingulate | 2.2731E-01 | 1.0751E-02 | Not significant |
| 677 | GCST90002483 | IDP T1 FAST ROIs L postcent gyrus | 2.2757E-01 | 1.0767E-02 | Not significant |
| 678 | GCST90002734 | ThalamNuclei lh volume VLp | 2.2814E-01 | 1.0782E-02 | Not significant |
| 679 | GCST90002950 | aparc-a2009s lh volume G-pariet-inf-Supramar | 2.2821E-01 | 1.0798E-02 | Not significant |
| 680 | GCST90002688 | HippSubfield lh volume Whole-hippocampal-head | 2.2903E-01 | 1.0814E-02 | Not significant |
| 681 | GCST90004496 | IDP dMRI TBSS ISOVF Posterior limb of internal capsule L | 2.2958E-01 | 1.0830E-02 | Not significant |
| 682 | GCST90003777 | aseg lh intensity choroid-plexus | 2.3055E-01 | 1.0846E-02 | Not significant |
| 683 | GCST90002909 | aparc-DKTatlas rh volume parsopercularis | 2.3094E-01 | 1.0862E-02 | Not significant |
| 684 | GCST90003193 | aparc-pial rh area parstriangularis | 2.3118E-01 | 1.0878E-02 | Not significant |
| 685 | GCST90003543 | aparc-DKTatlas lh thickness cuneus | 2.3241E-01 | 1.0894E-02 | Not significant |
| 686 | GCST90002566 | IDP T1 FAST ROIs L cerebellum VI | 2.3268E-01 | 1.0910E-02 | Not significant |
| 687 | GCST90003876 | IDP SWI T2star right accumbens | 2.3279E-01 | 1.0926E-02 | Not significant |
| 688 | GCST90002855 | BA-exvivo rh volume BA6 | 2.3298E-01 | 1.0941E-02 | Not significant |
| 689 | GCST90002956 | aparc-a2009s lh volume G-subcallosal | 2.3324E-01 | 1.0957E-02 | Not significant |
| 690 | GCST90005671 | rfMRI connectivity (ICA100 edge 818) | 2.3384E-01 | 1.0973E-02 | Not significant |
| 691 | GCST90004278 | IDP dMRI ProbtrackX L2 cgc r | 2.3390E-01 | 1.0989E-02 | Not significant |
| 692 | GCST90003305 | aparc-a2009s lh area G-cingul-Post-dorsal | 2.3410E-01 | 1.1005E-02 | Not significant |
| 693 | GCST90003655 | aparc-a2009s lh thickness S-front-middle | 2.3421E-01 | 1.1021E-02 | Not significant |
| 694 | GCST90004002 | IDP dMRI ProbtrackX MO atr l | 2.3425E-01 | 1.1037E-02 | Not significant |
| 695 | GCST90006063 | rfMRI connectivity (ICA100 edge 1210) | 2.3441E-01 | 1.1053E-02 | Not significant |
| 696 | GCST90002752 | ThalamNuclei rh volume VM | 2.3467E-01 | 1.1069E-02 | Not significant |
| 697 | GCST90004930 | rfMRI connectivity (ICA100 edge 77) | 2.3521E-01 | 1.1085E-02 | Not significant |
| 698 | GCST90003163 | aparc-pial lh area posteriorcingulate | 2.3521E-01 | 1.1101E-02 | Not significant |
| 699 | GCST90004536 | IDP dMRI ProbtrackX ISOVF fmi | 2.3534E-01 | 1.1116E-02 | Not significant |
| 700 | GCST90004739 | rfMRI connectivity (ICA25 edge 96) | 2.3537E-01 | 1.1132E-02 | Not significant |
| 701 | GCST90005267 | rfMRI connectivity (ICA100 edge 414) | 2.3544E-01 | 1.1148E-02 | Not significant |
| 702 | GCST90005315 | rfMRI connectivity (ICA100 edge 462) | 2.3554E-01 | 1.1164E-02 | Not significant |
| 703 | GCST90002990 | aparc-a2009s lh volume S-pericallosal | 2.3561E-01 | 1.1180E-02 | Not significant |
| 704 | GCST90006010 | rfMRI connectivity (ICA100 edge 1157) | 2.3586E-01 | 1.1196E-02 | Not significant |
| 705 | GCST90002568 | IDP T1 FAST ROIs R cerebellum VI | 2.3691E-01 | 1.1212E-02 | Not significant |
| 706 | GCST90003145 | aparc-pial lh area cuneus | 2.3691E-01 | 1.1228E-02 | Not significant |
| 707 | GCST90005607 | rfMRI connectivity (ICA100 edge 754) | 2.3706E-01 | 1.1244E-02 | Not significant |
| 708 | GCST90005426 | rfMRI connectivity (ICA100 edge 573) | 2.3727E-01 | 1.1260E-02 | Not significant |
| 709 | GCST90003758 | aseg global intensity Optic-Chiasm | 2.3801E-01 | 1.1275E-02 | Not significant |
| 710 | GCST90003409 | aparc-a2009s rh area Lat-Fis-ant-Horizont | 2.3910E-01 | 1.1291E-02 | Not significant |
| 711 | GCST90004472 | IDP dMRI ProbtrackX OD slf r | 2.3942E-01 | 1.1307E-02 | Not significant |
| 712 | GCST90002916 | aparc-DKTatlas rh volume precuneus | 2.3975E-01 | 1.1323E-02 | Not significant |
| 713 | GCST90003172 | aparc-pial lh area frontalpole | 2.4000E-01 | 1.1339E-02 | Not significant |
| 714 | GCST90002612 | aseg global volume-ratio BrainSegVol-to-eTIV | 2.4027E-01 | 1.1355E-02 | Not significant |
| 715 | GCST90004143 | IDP dMRI TBSS L2 Retrolenticular part of internal capsule R | 2.4031E-01 | 1.1371E-02 | Not significant |
| 716 | GCST90004468 | IDP dMRI ProbtrackX OD ml r | 2.4032E-01 | 1.1387E-02 | Not significant |
| 717 | GCST90004523 | IDP dMRI TBSS ISOVF Tapetum R | 2.4127E-01 | 1.1403E-02 | Not significant |
| 718 | GCST90004096 | IDP dMRI TBSS L1 Retrolenticular part of internal capsule L | 2.4143E-01 | 1.1419E-02 | Not significant |
| 719 | GCST90003191 | aparc-pial rh area parsopercularis | 2.4202E-01 | 1.1434E-02 | Not significant |
| 720 | GCST90004193 | IDP dMRI TBSS L3 Anterior corona radiata R | 2.4218E-01 | 1.1450E-02 | Not significant |
| 721 | GCST90003631 | aparc-a2009s lh thickness G-precentral | 2.4292E-01 | 1.1466E-02 | Not significant |
| 722 | GCST90003376 | aparc-a2009s rh area G+S-cingul-Ant | 2.4321E-01 | 1.1482E-02 | Not significant |
| 723 | GCST90003430 | aparc-a2009s rh area S-oc-temp-lat | 2.4325E-01 | 1.1498E-02 | Not significant |
| 724 | GCST90002544 | IDP T1 FAST ROIs R supracalc cortex | 2.4329E-01 | 1.1514E-02 | Not significant |
| 725 | GCST90003636 | aparc-a2009s lh thickness G-temp-sup-Lateral | 2.4438E-01 | 1.1530E-02 | Not significant |
| 726 | GCST90002525 | IDP T1 FAST ROIs L temp fusif cortex post | 2.4445E-01 | 1.1546E-02 | Not significant |
| 727 | GCST90003838 | wg rh intensity-contrast lateralorbitofrontal | 2.4571E-01 | 1.1562E-02 | Not significant |
| 728 | GCST90003506 | aparc-Desikan rh thickness superiorfrontal | 2.4571E-01 | 1.1578E-02 | Not significant |
| 729 | GCST90003190 | aparc-pial rh area paracentral | 2.4654E-01 | 1.1594E-02 | Not significant |
| 730 | GCST90004306 | IDP dMRI ProbtrackX L3 cgh l | 2.4690E-01 | 1.1609E-02 | Not significant |
| 731 | GCST90003229 | BA-exvivo rh area BA45 | 2.4729E-01 | 1.1625E-02 | Not significant |
| 732 | GCST90004564 | IDP tfMRI median BOLD faces-shapes amygdala | 2.4737E-01 | 1.1641E-02 | Not significant |
| 733 | GCST90004035 | IDP dMRI TBSS MD Medial lemniscus R | 2.4780E-01 | 1.1657E-02 | Not significant |
| 734 | GCST90003184 | aparc-pial rh area lateraloccipital | 2.4808E-01 | 1.1673E-02 | Not significant |
| 735 | GCST90003895 | IDP dMRI TBSS FA Posterior limb of internal capsule R | 2.4848E-01 | 1.1689E-02 | Not significant |
| 736 | GCST90003850 | wg rh intensity-contrast precentral | 2.4857E-01 | 1.1705E-02 | Not significant |
| 737 | GCST90003862 | IDP T2 FLAIR BIANCA WMH volume | 2.4994E-01 | 1.1721E-02 | Not significant |
| 738 | GCST90004162 | IDP dMRI TBSS L2 Fornix cres+Stria terminalis L | 2.4997E-01 | 1.1737E-02 | Not significant |
| 739 | GCST90003946 | IDP dMRI ProbtrackX FA slf l | 2.5038E-01 | 1.1753E-02 | Not significant |
| 740 | GCST90003524 | BA-exvivo lh thickness MT | 2.5116E-01 | 1.1768E-02 | Not significant |
| 741 | GCST90002966 | aparc-a2009s lh volume Pole-occipital | 2.5149E-01 | 1.1784E-02 | Not significant |
| 742 | GCST90002973 | aparc-a2009s lh volume S-circular-insula-sup | 2.5158E-01 | 1.1800E-02 | Not significant |
| 743 | GCST90002655 | AmygNuclei lh volume Corticoamygdaloid-transitio | 2.5178E-01 | 1.1816E-02 | Not significant |
| 744 | GCST90002528 | IDP T1 FAST ROIs R temp occ fusif cortex | 2.5353E-01 | 1.1832E-02 | Not significant |
| 745 | GCST90002995 | aparc-a2009s lh volume S-subparietal | 2.5356E-01 | 1.1848E-02 | Not significant |
| 746 | GCST90003855 | wg rh intensity-contrast superiorparietal | 2.5484E-01 | 1.1864E-02 | Not significant |
| 747 | GCST90004272 | IDP dMRI ProbtrackX L1 unc r | 2.5486E-01 | 1.1880E-02 | Not significant |
| 748 | GCST90003652 | aparc-a2009s lh thickness S-collat-transv-ant | 2.5499E-01 | 1.1896E-02 | Not significant |
| 749 | GCST90002638 | aseg rh volume Caudate | 2.5499E-01 | 1.1912E-02 | Not significant |
| 750 | GCST90005338 | rfMRI connectivity (ICA100 edge 485) | 2.5519E-01 | 1.1927E-02 | Not significant |
| 751 | GCST90005880 | rfMRI connectivity (ICA100 edge 1027) | 2.5524E-01 | 1.1943E-02 | Not significant |
| 752 | GCST90005483 | rfMRI connectivity (ICA100 edge 630) | 2.5587E-01 | 1.1959E-02 | Not significant |
| 753 | GCST90005122 | rfMRI connectivity (ICA100 edge 269) | 2.5597E-01 | 1.1975E-02 | Not significant |
| 754 | GCST90003079 | aparc-Desikan lh area fusiform | 2.5613E-01 | 1.1991E-02 | Not significant |
| 755 | GCST90005989 | rfMRI connectivity (ICA100 edge 1136) | 2.5697E-01 | 1.2007E-02 | Not significant |
| 756 | GCST90005015 | rfMRI connectivity (ICA100 edge 162) | 2.5700E-01 | 1.2023E-02 | Not significant |
| 757 | GCST90003049 | aparc-a2009s rh volume S-collat-transv-post | 2.5746E-01 | 1.2039E-02 | Not significant |
| 758 | GCST90005440 | rfMRI connectivity (ICA100 edge 587) | 2.5757E-01 | 1.2055E-02 | Not significant |
| 759 | GCST90006117 | rfMRI connectivity (ICA100 edge 1264) | 2.5799E-01 | 1.2071E-02 | Not significant |
| 760 | GCST90005692 | rfMRI connectivity (ICA100 edge 839) | 2.5801E-01 | 1.2087E-02 | Not significant |
| 761 | GCST90005976 | rfMRI connectivity (ICA100 edge 1123) | 2.5813E-01 | 1.2102E-02 | Not significant |
| 762 | GCST90004333 | IDP dMRI TBSS ICVF Corticospinal tract R | 2.5822E-01 | 1.2118E-02 | Not significant |
| 763 | GCST90004039 | IDP dMRI TBSS MD Superior cerebellar peduncle R | 2.5825E-01 | 1.2134E-02 | Not significant |
| 764 | GCST90004394 | IDP dMRI ProbtrackX ICVF ptr l | 2.5882E-01 | 1.2150E-02 | Not significant |
| 765 | GCST90006276 | rfMRI connectivity (ICA100 edge 1423) | 2.5909E-01 | 1.2166E-02 | Not significant |
| 766 | GCST90004689 | rfMRI connectivity (ICA25 edge 46) | 2.5925E-01 | 1.2182E-02 | Not significant |
| 767 | GCST90002564 | IDP T1 FAST ROIs L cerebellum V | 2.5948E-01 | 1.2198E-02 | Not significant |
| 768 | GCST90005463 | rfMRI connectivity (ICA100 edge 610) | 2.5988E-01 | 1.2214E-02 | Not significant |
| 769 | GCST90003522 | BA-exvivo lh thickness V1 | 2.5993E-01 | 1.2230E-02 | Not significant |
| 770 | GCST90005852 | rfMRI connectivity (ICA100 edge 999) | 2.5993E-01 | 1.2246E-02 | Not significant |
| 771 | GCST90003060 | aparc-a2009s rh volume S-orbital-lateral | 2.6055E-01 | 1.2261E-02 | Not significant |
| 772 | GCST90003074 | aparc-Desikan lh area bankssts | 2.6127E-01 | 1.2277E-02 | Not significant |
| 773 | GCST90005039 | rfMRI connectivity (ICA100 edge 186) | 2.6130E-01 | 1.2293E-02 | Not significant |
| 774 | GCST90005355 | rfMRI connectivity (ICA100 edge 502) | 2.6171E-01 | 1.2309E-02 | Not significant |
| 775 | GCST90004675 | rfMRI connectivity (ICA25 edge 32) | 2.6188E-01 | 1.2325E-02 | Not significant |
| 776 | GCST90005556 | rfMRI connectivity (ICA100 edge 703) | 2.6210E-01 | 1.2341E-02 | Not significant |
| 777 | GCST90006058 | rfMRI connectivity (ICA100 edge 1205) | 2.6238E-01 | 1.2357E-02 | Not significant |
| 778 | GCST90002576 | IDP T1 FAST ROIs V cerebellum VIIb | 2.6263E-01 | 1.2373E-02 | Not significant |
| 779 | GCST90005941 | rfMRI connectivity (ICA100 edge 1088) | 2.6265E-01 | 1.2389E-02 | Not significant |
| 780 | GCST90005787 | rfMRI connectivity (ICA100 edge 934) | 2.6280E-01 | 1.2405E-02 | Not significant |
| 781 | GCST90002925 | aparc-a2009s lh volume G+S-frontomargin | 2.6420E-01 | 1.2420E-02 | Not significant |
| 782 | GCST90002428 | IDP T1 SIENAX CSF normalised volume | 2.6443E-01 | 1.2436E-02 | Not significant |
| 783 | GCST90004016 | IDP dMRI ProbtrackX MO mcp | 2.6465E-01 | 1.2452E-02 | Not significant |
| 784 | GCST90003527 | BA-exvivo rh thickness BA1 | 2.6475E-01 | 1.2468E-02 | Not significant |
| 785 | GCST90002819 | aparc-Desikan rh volume parsorbitalis | 2.6477E-01 | 1.2484E-02 | Not significant |
| 786 | GCST90004826 | rfMRI connectivity (ICA25 edge 183) | 2.6478E-01 | 1.2500E-02 | Not significant |
| 787 | GCST90005103 | rfMRI connectivity (ICA100 edge 250) | 2.6553E-01 | 1.2516E-02 | Not significant |
| 788 | GCST90002682 | HippSubfield lh volume CA4-head | 2.6571E-01 | 1.2532E-02 | Not significant |
| 789 | GCST90005216 | rfMRI connectivity (ICA100 edge 363) | 2.6577E-01 | 1.2548E-02 | Not significant |
| 790 | GCST90003348 | aparc-a2009s lh area S-front-inf | 2.6645E-01 | 1.2564E-02 | Not significant |
| 791 | GCST90005289 | rfMRI connectivity (ICA100 edge 436) | 2.6668E-01 | 1.2580E-02 | Not significant |
| 792 | GCST90004178 | IDP dMRI TBSS L3 Corticospinal tract L | 2.6678E-01 | 1.2595E-02 | Not significant |
| 793 | GCST90005309 | rfMRI connectivity (ICA100 edge 456) | 2.6684E-01 | 1.2611E-02 | Not significant |
| 794 | GCST90003125 | aparc-Desikan rh area parsorbitalis | 2.6690E-01 | 1.2627E-02 | Not significant |
| 795 | GCST90005074 | rfMRI connectivity (ICA100 edge 221) | 2.6722E-01 | 1.2643E-02 | Not significant |
| 796 | GCST90003064 | aparc-a2009s rh volume S-pericallosal | 2.6738E-01 | 1.2659E-02 | Not significant |
| 797 | GCST90006333 | rfMRI connectivity (ICA100 edge 1480) | 2.6745E-01 | 1.2675E-02 | Not significant |
| 798 | GCST90002979 | aparc-a2009s lh volume S-interm-prim-Jensen | 2.6758E-01 | 1.2691E-02 | Not significant |
| 799 | GCST90004291 | IDP dMRI ProbtrackX L2 ml r | 2.6766E-01 | 1.2707E-02 | Not significant |
| 800 | GCST90003224 | BA-exvivo rh area BA3b | 2.6790E-01 | 1.2723E-02 | Not significant |
| 801 | GCST90006169 | rfMRI connectivity (ICA100 edge 1316) | 2.6794E-01 | 1.2739E-02 | Not significant |
| 802 | GCST90005673 | rfMRI connectivity (ICA100 edge 820) | 2.6819E-01 | 1.2754E-02 | Not significant |
| 803 | GCST90005610 | rfMRI connectivity (ICA100 edge 757) | 2.6825E-01 | 1.2770E-02 | Not significant |
| 804 | GCST90002875 | aparc-DKTatlas lh volume middletemporal | 2.6828E-01 | 1.2786E-02 | Not significant |
| 805 | GCST90005728 | rfMRI connectivity (ICA100 edge 875) | 2.6833E-01 | 1.2802E-02 | Not significant |
| 806 | GCST90002843 | BA-exvivo lh volume BA45 | 2.6902E-01 | 1.2818E-02 | Not significant |
| 807 | GCST90006077 | rfMRI connectivity (ICA100 edge 1224) | 2.6915E-01 | 1.2834E-02 | Not significant |
| 808 | GCST90004938 | rfMRI connectivity (ICA100 edge 85) | 2.6972E-01 | 1.2850E-02 | Not significant |
| 809 | GCST90006014 | rfMRI connectivity (ICA100 edge 1161) | 2.6990E-01 | 1.2866E-02 | Not significant |
| 810 | GCST90004748 | rfMRI connectivity (ICA25 edge 105) | 2.7041E-01 | 1.2882E-02 | Not significant |
| 811 | GCST90004885 | rfMRI connectivity (ICA100 edge 32) | 2.7056E-01 | 1.2898E-02 | Not significant |
| 812 | GCST90003495 | aparc-Desikan rh thickness paracentral | 2.7059E-01 | 1.2913E-02 | Not significant |
| 813 | GCST90004047 | IDP dMRI TBSS MD Retrolenticular part of internal capsule R | 2.7095E-01 | 1.2929E-02 | Not significant |
| 814 | GCST90003012 | aparc-a2009s rh volume G-front-inf-Triangul | 2.7113E-01 | 1.2945E-02 | Not significant |
| 815 | GCST90004053 | IDP dMRI TBSS MD Posterior corona radiata R | 2.7125E-01 | 1.2961E-02 | Not significant |
| 816 | GCST90002992 | aparc-a2009s lh volume S-precentral-inf-part | 2.7141E-01 | 1.2977E-02 | Not significant |
| 817 | GCST90003618 | aparc-a2009s lh thickness G-front-sup | 2.7145E-01 | 1.2993E-02 | Not significant |
| 818 | GCST90006102 | rfMRI connectivity (ICA100 edge 1249) | 2.7161E-01 | 1.3009E-02 | Not significant |
| 819 | GCST90004652 | rfMRI connectivity (ICA25 edge 9) | 2.7168E-01 | 1.3025E-02 | Not significant |
| 820 | GCST90006060 | rfMRI connectivity (ICA100 edge 1207) | 2.7240E-01 | 1.3041E-02 | Not significant |
| 821 | GCST90003889 | IDP dMRI TBSS FA Superior cerebellar peduncle R | 2.7249E-01 | 1.3057E-02 | Not significant |
| 822 | GCST90004905 | rfMRI connectivity (ICA100 edge 52) | 2.7299E-01 | 1.3073E-02 | Not significant |
| 823 | GCST90006304 | rfMRI connectivity (ICA100 edge 1451) | 2.7345E-01 | 1.3088E-02 | Not significant |
| 824 | GCST90005328 | rfMRI connectivity (ICA100 edge 475) | 2.7376E-01 | 1.3104E-02 | Not significant |
| 825 | GCST90004554 | IDP tfMRI median zstat shapes | 2.7464E-01 | 1.3120E-02 | Not significant |
| 826 | GCST90005586 | rfMRI connectivity (ICA100 edge 733) | 2.7471E-01 | 1.3136E-02 | Not significant |
| 827 | GCST90004687 | rfMRI connectivity (ICA25 edge 44) | 2.7481E-01 | 1.3152E-02 | Not significant |
| 828 | GCST90005152 | rfMRI connectivity (ICA100 edge 299) | 2.7483E-01 | 1.3168E-02 | Not significant |
| 829 | GCST90002633 | aseg rh volume Lateral-Ventricle | 2.7486E-01 | 1.3184E-02 | Not significant |
| 830 | GCST90006299 | rfMRI connectivity (ICA100 edge 1446) | 2.7535E-01 | 1.3200E-02 | Not significant |
| 831 | GCST90005190 | rfMRI connectivity (ICA100 edge 337) | 2.7577E-01 | 1.3216E-02 | Not significant |
| 832 | GCST90005432 | rfMRI connectivity (ICA100 edge 579) | 2.7603E-01 | 1.3232E-02 | Not significant |
| 833 | GCST90006124 | rfMRI connectivity (ICA100 edge 1271) | 2.7613E-01 | 1.3247E-02 | Not significant |
| 834 | GCST90003017 | aparc-a2009s rh volume G-occipital-middle | 2.7693E-01 | 1.3263E-02 | Not significant |
| 835 | GCST90003721 | aparc-a2009s rh thickness S-central | 2.7715E-01 | 1.3279E-02 | Not significant |
| 836 | GCST90006248 | rfMRI connectivity (ICA100 edge 1395) | 2.7716E-01 | 1.3295E-02 | Not significant |
| 837 | GCST90004957 | rfMRI connectivity (ICA100 edge 104) | 2.7765E-01 | 1.3311E-02 | Not significant |
| 838 | GCST90006072 | rfMRI connectivity (ICA100 edge 1219) | 2.7790E-01 | 1.3327E-02 | Not significant |
| 839 | GCST90004028 | IDP dMRI TBSS MD Pontine crossing tract | 2.7806E-01 | 1.3343E-02 | Not significant |
| 840 | GCST90002978 | aparc-a2009s lh volume S-front-sup | 2.7807E-01 | 1.3359E-02 | Not significant |
| 841 | GCST90005657 | rfMRI connectivity (ICA100 edge 804) | 2.7831E-01 | 1.3375E-02 | Not significant |
| 842 | GCST90005713 | rfMRI connectivity (ICA100 edge 860) | 2.7845E-01 | 1.3391E-02 | Not significant |
| 843 | GCST90002637 | aseg rh volume Thalamus-Proper | 2.7846E-01 | 1.3406E-02 | Not significant |
| 844 | GCST90004678 | rfMRI connectivity (ICA25 edge 35) | 2.7853E-01 | 1.3422E-02 | Not significant |
| 845 | GCST90003890 | IDP dMRI TBSS FA Superior cerebellar peduncle L | 2.7856E-01 | 1.3438E-02 | Not significant |
| 846 | GCST90005503 | rfMRI connectivity (ICA100 edge 650) | 2.7860E-01 | 1.3454E-02 | Not significant |
| 847 | GCST90002928 | aparc-a2009s lh volume G+S-subcentral | 2.7865E-01 | 1.3470E-02 | Not significant |
| 848 | GCST90005017 | rfMRI connectivity (ICA100 edge 164) | 2.7876E-01 | 1.3486E-02 | Not significant |
| 849 | GCST90004872 | rfMRI connectivity (ICA100 edge 19) | 2.7894E-01 | 1.3502E-02 | Not significant |
| 850 | GCST90004411 | IDP dMRI TBSS OD Medial lemniscus L | 2.7933E-01 | 1.3518E-02 | Not significant |
| 851 | GCST90003054 | aparc-a2009s rh volume S-intrapariet+P-trans | 2.7956E-01 | 1.3534E-02 | Not significant |
| 852 | GCST90003200 | aparc-pial rh area rostralmiddlefrontal | 2.7962E-01 | 1.3550E-02 | Not significant |
| 853 | GCST90004809 | rfMRI connectivity (ICA25 edge 166) | 2.7963E-01 | 1.3566E-02 | Not significant |
| 854 | GCST90005342 | rfMRI connectivity (ICA100 edge 489) | 2.7975E-01 | 1.3581E-02 | Not significant |
| 855 | GCST90003844 | wg rh intensity-contrast parsopercularis | 2.7977E-01 | 1.3597E-02 | Not significant |
| 856 | GCST90005701 | rfMRI connectivity (ICA100 edge 848) | 2.7981E-01 | 1.3613E-02 | Not significant |
| 857 | GCST90005515 | rfMRI connectivity (ICA100 edge 662) | 2.8043E-01 | 1.3629E-02 | Not significant |
| 858 | GCST90003741 | aparc-a2009s rh thickness S-parieto-occipital | 2.8050E-01 | 1.3645E-02 | Not significant |
| 859 | GCST90003086 | aparc-Desikan lh area medialorbitofrontal | 2.8083E-01 | 1.3661E-02 | Not significant |
| 860 | GCST90005822 | rfMRI connectivity (ICA100 edge 969) | 2.8127E-01 | 1.3677E-02 | Not significant |
| 861 | GCST90006205 | rfMRI connectivity (ICA100 edge 1352) | 2.8167E-01 | 1.3693E-02 | Not significant |
| 862 | GCST90005951 | rfMRI connectivity (ICA100 edge 1098) | 2.8208E-01 | 1.3709E-02 | Not significant |
| 863 | GCST90002880 | aparc-DKTatlas lh volume parstriangularis | 2.8212E-01 | 1.3725E-02 | Not significant |
| 864 | GCST90004416 | IDP dMRI TBSS OD Cerebral peduncle R | 2.8226E-01 | 1.3740E-02 | Not significant |
| 865 | GCST90003745 | aparc-a2009s rh thickness S-precentral-sup-part | 2.8285E-01 | 1.3756E-02 | Not significant |
| 866 | GCST90003523 | BA-exvivo lh thickness V2 | 2.8316E-01 | 1.3772E-02 | Not significant |
| 867 | GCST90004398 | IDP dMRI ProbtrackX ICVF str l | 2.8337E-01 | 1.3788E-02 | Not significant |
| 868 | GCST90004851 | rfMRI connectivity (ICA25 edge 208) | 2.8350E-01 | 1.3804E-02 | Not significant |
| 869 | GCST90004498 | IDP dMRI TBSS ISOVF Retrolenticular part of internal capsule L | 2.8354E-01 | 1.3820E-02 | Not significant |
| 870 | GCST90003825 | wg lh intensity-contrast transversetemporal | 2.8386E-01 | 1.3836E-02 | Not significant |
| 871 | GCST90004875 | rfMRI connectivity (ICA100 edge 22) | 2.8458E-01 | 1.3852E-02 | Not significant |
| 872 | GCST90003427 | aparc-a2009s rh area S-oc-middle+Lunatus | 2.8488E-01 | 1.3868E-02 | Not significant |
| 873 | GCST90002914 | aparc-DKTatlas rh volume posteriorcingulate | 2.8526E-01 | 1.3884E-02 | Not significant |
| 874 | GCST90003662 | aparc-a2009s lh thickness S-oc-temp-lat | 2.8559E-01 | 1.3899E-02 | Not significant |
| 875 | GCST90004201 | IDP dMRI TBSS L3 Sagittal stratum R | 2.8576E-01 | 1.3915E-02 | Not significant |
| 876 | GCST90004707 | rfMRI connectivity (ICA25 edge 64) | 2.8677E-01 | 1.3931E-02 | Not significant |
| 877 | GCST90004834 | rfMRI connectivity (ICA25 edge 191) | 2.8686E-01 | 1.3947E-02 | Not significant |
| 878 | GCST90006275 | rfMRI connectivity (ICA100 edge 1422) | 2.8687E-01 | 1.3963E-02 | Not significant |
| 879 | GCST90006030 | rfMRI connectivity (ICA100 edge 1177) | 2.8758E-01 | 1.3979E-02 | Not significant |
| 880 | GCST90005178 | rfMRI connectivity (ICA100 edge 325) | 2.8759E-01 | 1.3995E-02 | Not significant |
| 881 | GCST90005179 | rfMRI connectivity (ICA100 edge 326) | 2.8761E-01 | 1.4011E-02 | Not significant |
| 882 | GCST90003530 | BA-exvivo rh thickness BA3b | 2.8798E-01 | 1.4027E-02 | Not significant |
| 883 | GCST90003848 | wg rh intensity-contrast postcentral | 2.8808E-01 | 1.4043E-02 | Not significant |
| 884 | GCST90004615 | rfMRI amplitudes (ICA100 node 27) | 2.8812E-01 | 1.4059E-02 | Not significant |
| 885 | GCST90005960 | rfMRI connectivity (ICA100 edge 1107) | 2.8827E-01 | 1.4074E-02 | Not significant |
| 886 | GCST90004654 | rfMRI connectivity (ICA25 edge 11) | 2.8860E-01 | 1.4090E-02 | Not significant |
| 887 | GCST90002805 | aparc-Desikan rh volume cuneus | 2.8878E-01 | 1.4106E-02 | Not significant |
| 888 | GCST90005879 | rfMRI connectivity (ICA100 edge 1026) | 2.8897E-01 | 1.4122E-02 | Not significant |
| 889 | GCST90003232 | BA-exvivo rh area MT | 2.8901E-01 | 1.4138E-02 | Not significant |
| 890 | GCST90004658 | rfMRI connectivity (ICA25 edge 15) | 2.8933E-01 | 1.4154E-02 | Not significant |
| 891 | GCST90002824 | aparc-Desikan rh volume precentral | 2.8959E-01 | 1.4170E-02 | Not significant |
| 892 | GCST90003040 | aparc-a2009s rh volume Pole-occipital | 2.8995E-01 | 1.4186E-02 | Not significant |
| 893 | GCST90003854 | wg rh intensity-contrast superiorfrontal | 2.9041E-01 | 1.4202E-02 | Not significant |
| 894 | GCST90004343 | IDP dMRI TBSS ICVF Anterior limb of internal capsule R | 2.9068E-01 | 1.4218E-02 | Not significant |
| 895 | GCST90002648 | AmygNuclei lh volume Lateral-nucleus | 2.9085E-01 | 1.4233E-02 | Not significant |
| 896 | GCST90004230 | IDP dMRI ProbtrackX MD fmi | 2.9088E-01 | 1.4249E-02 | Not significant |
| 897 | GCST90005887 | rfMRI connectivity (ICA100 edge 1034) | 2.9135E-01 | 1.4265E-02 | Not significant |
| 898 | GCST90002733 | ThalamNuclei lh volume Pc | 2.9136E-01 | 1.4281E-02 | Not significant |
| 899 | GCST90003304 | aparc-a2009s lh area G+S-cingul-Mid-Post | 2.9137E-01 | 1.4297E-02 | Not significant |
| 900 | GCST90005170 | rfMRI connectivity (ICA100 edge 317) | 2.9149E-01 | 1.4313E-02 | Not significant |
| 901 | GCST90005465 | rfMRI connectivity (ICA100 edge 612) | 2.9167E-01 | 1.4329E-02 | Not significant |
| 902 | GCST90003194 | aparc-pial rh area pericalcarine | 2.9176E-01 | 1.4345E-02 | Not significant |
| 903 | GCST90006032 | rfMRI connectivity (ICA100 edge 1179) | 2.9183E-01 | 1.4361E-02 | Not significant |
| 904 | GCST90004152 | IDP dMRI TBSS L2 Posterior thalamic radiation L | 2.9222E-01 | 1.4377E-02 | Not significant |
| 905 | GCST90004453 | IDP dMRI ProbtrackX OD atr r | 2.9278E-01 | 1.4392E-02 | Not significant |
| 906 | GCST90002814 | aparc-Desikan rh volume medialorbitofrontal | 2.9294E-01 | 1.4408E-02 | Not significant |
| 907 | GCST90004755 | rfMRI connectivity (ICA25 edge 112) | 2.9296E-01 | 1.4424E-02 | Not significant |
| 908 | GCST90005047 | rfMRI connectivity (ICA100 edge 194) | 2.9312E-01 | 1.4440E-02 | Not significant |
| 909 | GCST90003242 | aparc-DKTatlas lh area isthmuscingulate | 2.9349E-01 | 1.4456E-02 | Not significant |
| 910 | GCST90003961 | IDP dMRI TBSS MO Medial lemniscus L | 2.9396E-01 | 1.4472E-02 | Not significant |
| 911 | GCST90003496 | aparc-Desikan rh thickness parsopercularis | 2.9406E-01 | 1.4488E-02 | Not significant |
| 912 | GCST90003238 | aparc-DKTatlas lh area entorhinal | 2.9429E-01 | 1.4504E-02 | Not significant |
| 913 | GCST90003588 | aparc-DKTatlas rh thickness parsorbitalis | 2.9443E-01 | 1.4520E-02 | Not significant |
| 914 | GCST90005633 | rfMRI connectivity (ICA100 edge 780) | 2.9445E-01 | 1.4536E-02 | Not significant |
| 915 | GCST90003393 | aparc-a2009s rh area G-oc-temp-med-Parahip | 2.9477E-01 | 1.4552E-02 | Not significant |
| 916 | GCST90005744 | rfMRI connectivity (ICA100 edge 891) | 2.9518E-01 | 1.4567E-02 | Not significant |
| 917 | GCST90003115 | aparc-Desikan rh area inferiortemporal | 2.9524E-01 | 1.4583E-02 | Not significant |
| 918 | GCST90002510 | IDP T1 FAST ROIs R cing gyrus post | 2.9525E-01 | 1.4599E-02 | Not significant |
| 919 | GCST90003386 | aparc-a2009s rh area G-front-sup | 2.9544E-01 | 1.4615E-02 | Not significant |
| 920 | GCST90005489 | rfMRI connectivity (ICA100 edge 636) | 2.9550E-01 | 1.4631E-02 | Not significant |
| 921 | GCST90004780 | rfMRI connectivity (ICA25 edge 137) | 2.9550E-01 | 1.4647E-02 | Not significant |
| 922 | GCST90004269 | IDP dMRI ProbtrackX L1 str l | 2.9559E-01 | 1.4663E-02 | Not significant |
| 923 | GCST90003083 | aparc-Desikan lh area lateraloccipital | 2.9579E-01 | 1.4679E-02 | Not significant |
| 924 | GCST90004385 | IDP dMRI ProbtrackX ICVF fma | 2.9616E-01 | 1.4695E-02 | Not significant |
| 925 | GCST90003540 | BA-exvivo rh thickness entorhinal | 2.9633E-01 | 1.4711E-02 | Not significant |
| 926 | GCST90002799 | aparc-Desikan lh volume frontalpole | 2.9662E-01 | 1.4726E-02 | Not significant |
| 927 | GCST90005609 | rfMRI connectivity (ICA100 edge 756) | 2.9685E-01 | 1.4742E-02 | Not significant |
| 928 | GCST90003481 | aparc-Desikan rh thickness caudalanteriorcingulate | 2.9723E-01 | 1.4758E-02 | Not significant |
| 929 | GCST90006212 | rfMRI connectivity (ICA100 edge 1359) | 2.9736E-01 | 1.4774E-02 | Not significant |
| 930 | GCST90003234 | BA-exvivo rh area entorhinal | 2.9751E-01 | 1.4790E-02 | Not significant |
| 931 | GCST90004366 | IDP dMRI TBSS ICVF Fornix cres+Stria terminalis L | 2.9768E-01 | 1.4806E-02 | Not significant |
| 932 | GCST90005803 | rfMRI connectivity (ICA100 edge 950) | 2.9792E-01 | 1.4822E-02 | Not significant |
| 933 | GCST90002444 | IDP T1 FIRST left hippocampus volume | 2.9814E-01 | 1.4838E-02 | Not significant |
| 934 | GCST90003766 | aseg lh intensity Cerebellum-White-Matter | 2.9827E-01 | 1.4854E-02 | Not significant |
| 935 | GCST90003614 | aparc-a2009s lh thickness G-front-inf-Opercular | 2.9835E-01 | 1.4870E-02 | Not significant |
| 936 | GCST90002511 | IDP T1 FAST ROIs L precun cortex | 2.9846E-01 | 1.4885E-02 | Not significant |
| 937 | GCST90003938 | IDP dMRI ProbtrackX FA ifo r | 2.9848E-01 | 1.4901E-02 | Not significant |
| 938 | GCST90003432 | aparc-a2009s rh area S-orbital-lateral | 2.9848E-01 | 1.4917E-02 | Not significant |
| 939 | GCST90002741 | ThalamNuclei rh volume VPL | 2.9857E-01 | 1.4933E-02 | Not significant |
| 940 | GCST90003717 | aparc-a2009s rh thickness Lat-Fis-post | 2.9923E-01 | 1.4949E-02 | Not significant |
| 941 | GCST90003097 | aparc-Desikan lh area precuneus | 2.9978E-01 | 1.4965E-02 | Not significant |
| 942 | GCST90004311 | IDP dMRI ProbtrackX L3 fmi | 2.9987E-01 | 1.4981E-02 | Not significant |
| 943 | GCST90006045 | rfMRI connectivity (ICA100 edge 1192) | 3.0004E-01 | 1.4997E-02 | Not significant |
| 944 | GCST90002632 | aseg rh volume CerebralWhiteMatter | 3.0058E-01 | 1.5013E-02 | Not significant |
| 945 | GCST90003209 | BA-exvivo lh area BA3a | 3.0078E-01 | 1.5029E-02 | Not significant |
| 946 | GCST90004303 | IDP dMRI ProbtrackX L3 atr r | 3.0088E-01 | 1.5045E-02 | Not significant |
| 947 | GCST90003701 | aparc-a2009s rh thickness G-pariet-inf-Angular | 3.0091E-01 | 1.5060E-02 | Not significant |
| 948 | GCST90003070 | aparc-a2009s rh volume S-temporal-inf | 3.0098E-01 | 1.5076E-02 | Not significant |
| 949 | GCST90002548 | IDP T1 FAST ROIs R thalamus | 3.0108E-01 | 1.5092E-02 | Not significant |
| 950 | GCST90002937 | aparc-a2009s lh volume G-front-inf-Orbital | 3.0128E-01 | 1.5108E-02 | Not significant |
| 951 | GCST90005184 | rfMRI connectivity (ICA100 edge 331) | 3.0129E-01 | 1.5124E-02 | Not significant |
| 952 | GCST90005165 | rfMRI connectivity (ICA100 edge 312) | 3.0148E-01 | 1.5140E-02 | Not significant |
| 953 | GCST90005565 | rfMRI connectivity (ICA100 edge 712) | 3.0159E-01 | 1.5156E-02 | Not significant |
| 954 | GCST90002594 | aseg global volume TotalGray | 3.0173E-01 | 1.5172E-02 | Not significant |
| 955 | GCST90003198 | aparc-pial rh area precuneus | 3.0209E-01 | 1.5188E-02 | Not significant |
| 956 | GCST90003011 | aparc-a2009s rh volume G-front-inf-Orbital | 3.0229E-01 | 1.5204E-02 | Not significant |
| 957 | GCST90003582 | aparc-DKTatlas rh thickness lingual | 3.0231E-01 | 1.5219E-02 | Not significant |
| 958 | GCST90003531 | BA-exvivo rh thickness BA4a | 3.0231E-01 | 1.5235E-02 | Not significant |
| 959 | GCST90003669 | aparc-a2009s lh thickness S-postcentral | 3.0231E-01 | 1.5251E-02 | Not significant |
| 960 | GCST90004428 | IDP dMRI TBSS OD Posterior corona radiata R | 3.0243E-01 | 1.5267E-02 | Not significant |
| 961 | GCST90004740 | rfMRI connectivity (ICA25 edge 97) | 3.0256E-01 | 1.5283E-02 | Not significant |
| 962 | GCST90006152 | rfMRI connectivity (ICA100 edge 1299) | 3.0276E-01 | 1.5299E-02 | Not significant |
| 963 | GCST90003181 | aparc-pial rh area inferiorparietal | 3.0284E-01 | 1.5315E-02 | Not significant |
| 964 | GCST90005359 | rfMRI connectivity (ICA100 edge 506) | 3.0286E-01 | 1.5331E-02 | Not significant |
| 965 | GCST90005683 | rfMRI connectivity (ICA100 edge 830) | 3.0299E-01 | 1.5347E-02 | Not significant |
| 966 | GCST90002502 | IDP T1 FAST ROIs R juxtapos lobule cortex | 3.0328E-01 | 1.5363E-02 | Not significant |
| 967 | GCST90006007 | rfMRI connectivity (ICA100 edge 1154) | 3.0336E-01 | 1.5378E-02 | Not significant |
| 968 | GCST90004092 | IDP dMRI TBSS L1 Anterior limb of internal capsule L | 3.0364E-01 | 1.5394E-02 | Not significant |
| 969 | GCST90004765 | rfMRI connectivity (ICA25 edge 122) | 3.0376E-01 | 1.5410E-02 | Not significant |
| 970 | GCST90005161 | rfMRI connectivity (ICA100 edge 308) | 3.0408E-01 | 1.5426E-02 | Not significant |
| 971 | GCST90004008 | IDP dMRI ProbtrackX MO cst l | 3.0486E-01 | 1.5442E-02 | Not significant |
| 972 | GCST90006314 | rfMRI connectivity (ICA100 edge 1461) | 3.0625E-01 | 1.5458E-02 | Not significant |
| 973 | GCST90004126 | IDP dMRI TBSS L2 Body of corpus callosum | 3.0646E-01 | 1.5474E-02 | Not significant |
| 974 | GCST90003207 | BA-exvivo lh area BA1 | 3.0648E-01 | 1.5490E-02 | Not significant |
| 975 | GCST90006158 | rfMRI connectivity (ICA100 edge 1305) | 3.0667E-01 | 1.5506E-02 | Not significant |
| 976 | GCST90004614 | rfMRI amplitudes (ICA100 node 26) | 3.0677E-01 | 1.5522E-02 | Not significant |
| 977 | GCST90003796 | wg lh intensity-contrast cuneus | 3.0682E-01 | 1.5538E-02 | Not significant |
| 978 | GCST90005252 | rfMRI connectivity (ICA100 edge 399) | 3.0711E-01 | 1.5553E-02 | Not significant |
| 979 | GCST90004935 | rfMRI connectivity (ICA100 edge 82) | 3.0729E-01 | 1.5569E-02 | Not significant |
| 980 | GCST90005005 | rfMRI connectivity (ICA100 edge 152) | 3.0756E-01 | 1.5585E-02 | Not significant |
| 981 | GCST90005814 | rfMRI connectivity (ICA100 edge 961) | 3.0807E-01 | 1.5601E-02 | Not significant |
| 982 | GCST90003390 | aparc-a2009s rh area G-occipital-sup | 3.0826E-01 | 1.5617E-02 | Not significant |
| 983 | GCST90002901 | aparc-DKTatlas rh volume isthmuscingulate | 3.0831E-01 | 1.5633E-02 | Not significant |
| 984 | GCST90006175 | rfMRI connectivity (ICA100 edge 1322) | 3.0842E-01 | 1.5649E-02 | Not significant |
| 985 | GCST90005857 | rfMRI connectivity (ICA100 edge 1004) | 3.0845E-01 | 1.5665E-02 | Not significant |
| 986 | GCST90002680 | HippSubfield lh volume CA3-body | 3.0926E-01 | 1.5681E-02 | Not significant |
| 987 | GCST90002783 | aparc-Desikan lh volume parahippocampal | 3.0937E-01 | 1.5697E-02 | Not significant |
| 988 | GCST90002506 | IDP T1 FAST ROIs R paracing gyrus | 3.0938E-01 | 1.5712E-02 | Not significant |
| 989 | GCST90005344 | rfMRI connectivity (ICA100 edge 491) | 3.0939E-01 | 1.5728E-02 | Not significant |
| 990 | GCST90003526 | BA-exvivo lh thickness entorhinal | 3.0948E-01 | 1.5744E-02 | Not significant |
| 991 | GCST90004444 | IDP dMRI TBSS OD Superior fronto-occipital fasciculus R | 3.0953E-01 | 1.5760E-02 | Not significant |
| 992 | GCST90005413 | rfMRI connectivity (ICA100 edge 560) | 3.0970E-01 | 1.5776E-02 | Not significant |
| 993 | GCST90005894 | rfMRI connectivity (ICA100 edge 1041) | 3.0991E-01 | 1.5792E-02 | Not significant |
| 994 | GCST90004622 | rfMRI amplitudes (ICA100 node 34) | 3.1032E-01 | 1.5808E-02 | Not significant |
| 995 | GCST90004136 | IDP dMRI TBSS L2 Superior cerebellar peduncle L | 3.1086E-01 | 1.5824E-02 | Not significant |
| 996 | GCST90003042 | aparc-a2009s rh volume S-calcarine | 3.1115E-01 | 1.5840E-02 | Not significant |
| 997 | GCST90003426 | aparc-a2009s rh area S-intrapariet+P-trans | 3.1118E-01 | 1.5856E-02 | Not significant |
| 998 | GCST90004949 | rfMRI connectivity (ICA100 edge 96) | 3.1122E-01 | 1.5872E-02 | Not significant |
| 999 | GCST90004798 | rfMRI connectivity (ICA25 edge 155) | 3.1131E-01 | 1.5887E-02 | Not significant |
| 1000 | GCST90003413 | aparc-a2009s rh area Pole-temporal | 3.1139E-01 | 1.5903E-02 | Not significant |
| 1001 | GCST90006142 | rfMRI connectivity (ICA100 edge 1289) | 3.1182E-01 | 1.5919E-02 | Not significant |
| 1002 | GCST90002946 | aparc-a2009s lh volume G-oc-temp-med-Lingual | 3.1184E-01 | 1.5935E-02 | Not significant |
| 1003 | GCST90004990 | rfMRI connectivity (ICA100 edge 137) | 3.1189E-01 | 1.5951E-02 | Not significant |
| 1004 | GCST90005973 | rfMRI connectivity (ICA100 edge 1120) | 3.1261E-01 | 1.5967E-02 | Not significant |
| 1005 | GCST90006273 | rfMRI connectivity (ICA100 edge 1420) | 3.1279E-01 | 1.5983E-02 | Not significant |
| 1006 | GCST90004395 | IDP dMRI ProbtrackX ICVF ptr r | 3.1306E-01 | 1.5999E-02 | Not significant |
| 1007 | GCST90004061 | IDP dMRI TBSS MD Cingulum cingulate gyrus R | 3.1326E-01 | 1.6015E-02 | Not significant |
| 1008 | GCST90003394 | aparc-a2009s rh area G-orbital | 3.1332E-01 | 1.6031E-02 | Not significant |
| 1009 | GCST90003541 | aparc-DKTatlas lh thickness caudalanteriorcingulate | 3.1351E-01 | 1.6046E-02 | Not significant |
| 1010 | GCST90004375 | IDP dMRI ProbtrackX ICVF ar l | 3.1356E-01 | 1.6062E-02 | Not significant |
| 1011 | GCST90005676 | rfMRI connectivity (ICA100 edge 823) | 3.1385E-01 | 1.6078E-02 | Not significant |
| 1012 | GCST90004058 | IDP dMRI TBSS MD Sagittal stratum L | 3.1437E-01 | 1.6094E-02 | Not significant |
| 1013 | GCST90006349 | QC T1 inverse CNR | 3.1530E-01 | 1.6110E-02 | Not significant |
| 1014 | GCST90004431 | IDP dMRI TBSS OD Posterior thalamic radiation L | 3.1533E-01 | 1.6126E-02 | Not significant |
| 1015 | GCST90004579 | rfMRI amplitudes (ICA25 node 12) | 3.1542E-01 | 1.6142E-02 | Not significant |
| 1016 | GCST90002769 | aparc-Desikan lh volume bankssts | 3.1575E-01 | 1.6158E-02 | Not significant |
| 1017 | GCST90002586 | IDP T1 FAST ROIs R cerebellum IX | 3.1595E-01 | 1.6174E-02 | Not significant |
| 1018 | GCST90003954 | IDP dMRI TBSS MO Genu of corpus callosum | 3.1601E-01 | 1.6190E-02 | Not significant |
| 1019 | GCST90003909 | IDP dMRI TBSS FA External capsule R | 3.1639E-01 | 1.6205E-02 | Not significant |
| 1020 | GCST90005987 | rfMRI connectivity (ICA100 edge 1134) | 3.1692E-01 | 1.6221E-02 | Not significant |
| 1021 | GCST90002447 | IDP T1 FIRST right amygdala volume | 3.1697E-01 | 1.6237E-02 | Not significant |
| 1022 | GCST90006222 | rfMRI connectivity (ICA100 edge 1369) | 3.1703E-01 | 1.6253E-02 | Not significant |
| 1023 | GCST90002876 | aparc-DKTatlas lh volume parahippocampal | 3.1751E-01 | 1.6269E-02 | Not significant |
| 1024 | GCST90002427 | IDP T1 SIENAX peripheral grey unnormalised volume | 3.1791E-01 | 1.6285E-02 | Not significant |
| 1025 | GCST90002431 | IDP T1 SIENAX grey unnormalised volume | 3.1805E-01 | 1.6301E-02 | Not significant |
| 1026 | GCST90005205 | rfMRI connectivity (ICA100 edge 352) | 3.1889E-01 | 1.6317E-02 | Not significant |
| 1027 | GCST90003791 | aseg rh intensity choroid-plexus | 3.1906E-01 | 1.6333E-02 | Not significant |
| 1028 | GCST90002588 | IDP T1 FAST ROIs V cerebellum X | 3.1948E-01 | 1.6349E-02 | Not significant |
| 1029 | GCST90003374 | aparc-a2009s rh area G+S-subcentral | 3.1956E-01 | 1.6365E-02 | Not significant |
| 1030 | GCST90005438 | rfMRI connectivity (ICA100 edge 585) | 3.1963E-01 | 1.6380E-02 | Not significant |
| 1031 | GCST90005694 | rfMRI connectivity (ICA100 edge 841) | 3.1972E-01 | 1.6396E-02 | Not significant |
| 1032 | GCST90002762 | ThalamNuclei lh volume Whole-thalamus | 3.1995E-01 | 1.6412E-02 | Not significant |
| 1033 | GCST90005407 | rfMRI connectivity (ICA100 edge 554) | 3.2022E-01 | 1.6428E-02 | Not significant |
| 1034 | GCST90004389 | IDP dMRI ProbtrackX ICVF ilf l | 3.2047E-01 | 1.6444E-02 | Not significant |
| 1035 | GCST90003566 | aparc-DKTatlas lh thickness superiorfrontal | 3.2070E-01 | 1.6460E-02 | Not significant |
| 1036 | GCST90004918 | rfMRI connectivity (ICA100 edge 65) | 3.2088E-01 | 1.6476E-02 | Not significant |
| 1037 | GCST90002943 | aparc-a2009s lh volume G-occipital-middle | 3.2096E-01 | 1.6492E-02 | Not significant |
| 1038 | GCST90006193 | rfMRI connectivity (ICA100 edge 1340) | 3.2098E-01 | 1.6508E-02 | Not significant |
| 1039 | GCST90003048 | aparc-a2009s rh volume S-collat-transv-ant | 3.2147E-01 | 1.6524E-02 | Not significant |
| 1040 | GCST90003313 | aparc-a2009s lh area G-Ins-lg+S-cent-ins | 3.2175E-01 | 1.6539E-02 | Not significant |
| 1041 | GCST90004029 | IDP dMRI TBSS MD Genu of corpus callosum | 3.2211E-01 | 1.6555E-02 | Not significant |
| 1042 | GCST90005936 | rfMRI connectivity (ICA100 edge 1083) | 3.2222E-01 | 1.6571E-02 | Not significant |
| 1043 | GCST90003714 | aparc-a2009s rh thickness G-temporal-middle | 3.2241E-01 | 1.6587E-02 | Not significant |
| 1044 | GCST90003558 | aparc-DKTatlas lh thickness parstriangularis | 3.2249E-01 | 1.6603E-02 | Not significant |
| 1045 | GCST90005398 | rfMRI connectivity (ICA100 edge 545) | 3.2255E-01 | 1.6619E-02 | Not significant |
| 1046 | GCST90002679 | HippSubfield lh volume GC-ML-DG-head | 3.2295E-01 | 1.6635E-02 | Not significant |
| 1047 | GCST90003101 | aparc-Desikan lh area superiorparietal | 3.2336E-01 | 1.6651E-02 | Not significant |
| 1048 | GCST90003062 | aparc-a2009s rh volume S-orbital-H-Shaped | 3.2361E-01 | 1.6667E-02 | Not significant |
| 1049 | GCST90005666 | rfMRI connectivity (ICA100 edge 813) | 3.2387E-01 | 1.6683E-02 | Not significant |
| 1050 | GCST90006206 | rfMRI connectivity (ICA100 edge 1353) | 3.2390E-01 | 1.6698E-02 | Not significant |
| 1051 | GCST90004573 | rfMRI amplitudes (ICA25 node 6) | 3.2396E-01 | 1.6714E-02 | Not significant |
| 1052 | GCST90003480 | aparc-Desikan rh thickness bankssts | 3.2405E-01 | 1.6730E-02 | Not significant |
| 1053 | GCST90002689 | HippSubfield lh volume Whole-hippocampus | 3.2457E-01 | 1.6746E-02 | Not significant |
| 1054 | GCST90004105 | IDP dMRI TBSS L1 Sagittal stratum R | 3.2479E-01 | 1.6762E-02 | Not significant |
| 1055 | GCST90003628 | aparc-a2009s lh thickness G-pariet-inf-Supramar | 3.2483E-01 | 1.6778E-02 | Not significant |
| 1056 | GCST90005725 | rfMRI connectivity (ICA100 edge 872) | 3.2488E-01 | 1.6794E-02 | Not significant |
| 1057 | GCST90004460 | IDP dMRI ProbtrackX OD fma | 3.2516E-01 | 1.6810E-02 | Not significant |
| 1058 | GCST90004070 | IDP dMRI TBSS MD Superior fronto-occipital fasciculus L | 3.2536E-01 | 1.6826E-02 | Not significant |
| 1059 | GCST90002738 | ThalamNuclei rh volume PuI | 3.2537E-01 | 1.6842E-02 | Not significant |
| 1060 | GCST90002546 | IDP T1 FAST ROIs R occ pole | 3.2547E-01 | 1.6858E-02 | Not significant |
| 1061 | GCST90005220 | rfMRI connectivity (ICA100 edge 367) | 3.2551E-01 | 1.6873E-02 | Not significant |
| 1062 | GCST90002804 | aparc-Desikan rh volume caudalmiddlefrontal | 3.2587E-01 | 1.6889E-02 | Not significant |
| 1063 | GCST90004018 | IDP dMRI ProbtrackX MO ml r | 3.2611E-01 | 1.6905E-02 | Not significant |
| 1064 | GCST90005316 | rfMRI connectivity (ICA100 edge 463) | 3.2712E-01 | 1.6921E-02 | Not significant |
| 1065 | GCST90006061 | rfMRI connectivity (ICA100 edge 1208) | 3.2754E-01 | 1.6937E-02 | Not significant |
| 1066 | GCST90005128 | rfMRI connectivity (ICA100 edge 275) | 3.2767E-01 | 1.6953E-02 | Not significant |
| 1067 | GCST90005598 | rfMRI connectivity (ICA100 edge 745) | 3.2785E-01 | 1.6969E-02 | Not significant |
| 1068 | GCST90003446 | aparc-Desikan lh thickness bankssts | 3.2823E-01 | 1.6985E-02 | Not significant |
| 1069 | GCST90003354 | aparc-a2009s lh area S-oc-sup+transversal | 3.2894E-01 | 1.7001E-02 | Not significant |
| 1070 | GCST90005439 | rfMRI connectivity (ICA100 edge 586) | 3.2958E-01 | 1.7017E-02 | Not significant |
| 1071 | GCST90003158 | aparc-pial lh area parsopercularis | 3.3017E-01 | 1.7032E-02 | Not significant |
| 1072 | GCST90004300 | IDP dMRI ProbtrackX L3 ar l | 3.3021E-01 | 1.7048E-02 | Not significant |
| 1073 | GCST90005946 | rfMRI connectivity (ICA100 edge 1093) | 3.3044E-01 | 1.7064E-02 | Not significant |
| 1074 | GCST90003829 | wg rh intensity-contrast caudalanteriorcingulate | 3.3044E-01 | 1.7080E-02 | Not significant |
| 1075 | GCST90006208 | rfMRI connectivity (ICA100 edge 1355) | 3.3062E-01 | 1.7096E-02 | Not significant |
| 1076 | GCST90003250 | aparc-DKTatlas lh area parsopercularis | 3.3078E-01 | 1.7112E-02 | Not significant |
| 1077 | GCST90003629 | aparc-a2009s lh thickness G-parietal-sup | 3.3082E-01 | 1.7128E-02 | Not significant |
| 1078 | GCST90005652 | rfMRI connectivity (ICA100 edge 799) | 3.3100E-01 | 1.7144E-02 | Not significant |
| 1079 | GCST90002996 | aparc-a2009s lh volume S-temporal-inf | 3.3184E-01 | 1.7160E-02 | Not significant |
| 1080 | GCST90006303 | rfMRI connectivity (ICA100 edge 1450) | 3.3191E-01 | 1.7176E-02 | Not significant |
| 1081 | GCST90006308 | rfMRI connectivity (ICA100 edge 1455) | 3.3240E-01 | 1.7191E-02 | Not significant |
| 1082 | GCST90005538 | rfMRI connectivity (ICA100 edge 685) | 3.3286E-01 | 1.7207E-02 | Not significant |
| 1083 | GCST90006295 | rfMRI connectivity (ICA100 edge 1442) | 3.3289E-01 | 1.7223E-02 | Not significant |
| 1084 | GCST90003414 | aparc-a2009s rh area S-calcarine | 3.3326E-01 | 1.7239E-02 | Not significant |
| 1085 | GCST90004189 | IDP dMRI TBSS L3 Posterior limb of internal capsule R | 3.3349E-01 | 1.7255E-02 | Not significant |
| 1086 | GCST90003658 | aparc-a2009s lh thickness S-intrapariet+P-trans | 3.3384E-01 | 1.7271E-02 | Not significant |
| 1087 | GCST90002520 | IDP T1 FAST ROIs R parahipp gyrus post | 3.3440E-01 | 1.7287E-02 | Not significant |
| 1088 | GCST90003630 | aparc-a2009s lh thickness G-postcentral | 3.3460E-01 | 1.7303E-02 | Not significant |
| 1089 | GCST90006315 | rfMRI connectivity (ICA100 edge 1462) | 3.3508E-01 | 1.7319E-02 | Not significant |
| 1090 | GCST90004316 | IDP dMRI ProbtrackX L3 mcp | 3.3511E-01 | 1.7335E-02 | Not significant |
| 1091 | GCST90004108 | IDP dMRI TBSS L1 External capsule L | 3.3594E-01 | 1.7351E-02 | Not significant |
| 1092 | GCST90003428 | aparc-a2009s rh area S-oc-sup+transversal | 3.3600E-01 | 1.7366E-02 | Not significant |
| 1093 | GCST90004236 | IDP dMRI ProbtrackX MD ml l | 3.3626E-01 | 1.7382E-02 | Not significant |
| 1094 | GCST90002539 | IDP T1 FAST ROIs L heschl gyrus | 3.3647E-01 | 1.7398E-02 | Not significant |
| 1095 | GCST90006244 | rfMRI connectivity (ICA100 edge 1391) | 3.3653E-01 | 1.7414E-02 | Not significant |
| 1096 | GCST90004673 | rfMRI connectivity (ICA25 edge 30) | 3.3661E-01 | 1.7430E-02 | Not significant |
| 1097 | GCST90004890 | rfMRI connectivity (ICA100 edge 37) | 3.3684E-01 | 1.7446E-02 | Not significant |
| 1098 | GCST90004868 | rfMRI connectivity (ICA100 edge 15) | 3.3696E-01 | 1.7462E-02 | Not significant |
| 1099 | GCST90004494 | IDP dMRI TBSS ISOVF Anterior limb of internal capsule L | 3.3706E-01 | 1.7478E-02 | Not significant |
| 1100 | GCST90002469 | IDP T1 FAST ROIs L sup temp gyrus post | 3.3787E-01 | 1.7494E-02 | Not significant |
| 1101 | GCST90002660 | AmygNuclei rh volume Accessory-Basal-nucleus | 3.3804E-01 | 1.7510E-02 | Not significant |
| 1102 | GCST90003696 | aparc-a2009s rh thickness G-occipital-sup | 3.3821E-01 | 1.7525E-02 | Not significant |
| 1103 | GCST90006081 | rfMRI connectivity (ICA100 edge 1228) | 3.3833E-01 | 1.7541E-02 | Not significant |
| 1104 | GCST90002537 | IDP T1 FAST ROIs L planum polare | 3.3839E-01 | 1.7557E-02 | Not significant |
| 1105 | GCST90004876 | rfMRI connectivity (ICA100 edge 23) | 3.3841E-01 | 1.7573E-02 | Not significant |
| 1106 | GCST90006086 | rfMRI connectivity (ICA100 edge 1233) | 3.3856E-01 | 1.7589E-02 | Not significant |
| 1107 | GCST90004181 | IDP dMRI TBSS L3 Inferior cerebellar peduncle R | 3.3869E-01 | 1.7605E-02 | Not significant |
| 1108 | GCST90006107 | rfMRI connectivity (ICA100 edge 1254) | 3.3912E-01 | 1.7621E-02 | Not significant |
| 1109 | GCST90005933 | rfMRI connectivity (ICA100 edge 1080) | 3.3913E-01 | 1.7637E-02 | Not significant |
| 1110 | GCST90004671 | rfMRI connectivity (ICA25 edge 28) | 3.3934E-01 | 1.7653E-02 | Not significant |
| 1111 | GCST90004387 | IDP dMRI ProbtrackX ICVF ifo l | 3.4018E-01 | 1.7669E-02 | Not significant |
| 1112 | GCST90002696 | HippSubfield rh volume CA1-head | 3.4065E-01 | 1.7684E-02 | Not significant |
| 1113 | GCST90003254 | aparc-DKTatlas lh area postcentral | 3.4075E-01 | 1.7700E-02 | Not significant |
| 1114 | GCST90004972 | rfMRI connectivity (ICA100 edge 119) | 3.4075E-01 | 1.7716E-02 | Not significant |
| 1115 | GCST90005025 | rfMRI connectivity (ICA100 edge 172) | 3.4087E-01 | 1.7732E-02 | Not significant |
| 1116 | GCST90003452 | aparc-Desikan lh thickness inferiorparietal | 3.4111E-01 | 1.7748E-02 | Not significant |
| 1117 | GCST90003860 | wg rh intensity-contrast transversetemporal | 3.4148E-01 | 1.7764E-02 | Not significant |
| 1118 | GCST90005736 | rfMRI connectivity (ICA100 edge 883) | 3.4186E-01 | 1.7780E-02 | Not significant |
| 1119 | GCST90003392 | aparc-a2009s rh area G-oc-temp-med-Lingual | 3.4200E-01 | 1.7796E-02 | Not significant |
| 1120 | GCST90004778 | rfMRI connectivity (ICA25 edge 135) | 3.4207E-01 | 1.7812E-02 | Not significant |
| 1121 | GCST90004989 | rfMRI connectivity (ICA100 edge 136) | 3.4211E-01 | 1.7828E-02 | Not significant |
| 1122 | GCST90004240 | IDP dMRI ProbtrackX MD slf l | 3.4324E-01 | 1.7844E-02 | Not significant |
| 1123 | GCST90002504 | IDP T1 FAST ROIs R subcallosal cortex | 3.4324E-01 | 1.7859E-02 | Not significant |
| 1124 | GCST90004457 | IDP dMRI ProbtrackX OD cgh r | 3.4330E-01 | 1.7875E-02 | Not significant |
| 1125 | GCST90004951 | rfMRI connectivity (ICA100 edge 98) | 3.4363E-01 | 1.7891E-02 | Not significant |
| 1126 | GCST90003082 | aparc-Desikan lh area isthmuscingulate | 3.4380E-01 | 1.7907E-02 | Not significant |
| 1127 | GCST90005048 | rfMRI connectivity (ICA100 edge 195) | 3.4381E-01 | 1.7923E-02 | Not significant |
| 1128 | GCST90002806 | aparc-Desikan rh volume entorhinal | 3.4421E-01 | 1.7939E-02 | Not significant |
| 1129 | GCST90005306 | rfMRI connectivity (ICA100 edge 453) | 3.4467E-01 | 1.7955E-02 | Not significant |
| 1130 | GCST90004256 | IDP dMRI ProbtrackX L1 fma | 3.4470E-01 | 1.7971E-02 | Not significant |
| 1131 | GCST90005266 | rfMRI connectivity (ICA100 edge 413) | 3.4478E-01 | 1.7987E-02 | Not significant |
| 1132 | GCST90002643 | aseg rh volume Accumbens-area | 3.4487E-01 | 1.8003E-02 | Not significant |
| 1133 | GCST90002471 | IDP T1 FAST ROIs L mid temp gyrus ant | 3.4488E-01 | 1.8018E-02 | Not significant |
| 1134 | GCST90002906 | aparc-DKTatlas rh volume middletemporal | 3.4531E-01 | 1.8034E-02 | Not significant |
| 1135 | GCST90002498 | IDP T1 FAST ROIs R intracalc cortex | 3.4583E-01 | 1.8050E-02 | Not significant |
| 1136 | GCST90005659 | rfMRI connectivity (ICA100 edge 806) | 3.4610E-01 | 1.8066E-02 | Not significant |
| 1137 | GCST90005076 | rfMRI connectivity (ICA100 edge 223) | 3.4611E-01 | 1.8082E-02 | Not significant |
| 1138 | GCST90004327 | IDP dMRI TBSS ICVF Middle cerebellar peduncle | 3.4617E-01 | 1.8098E-02 | Not significant |
| 1139 | GCST90005595 | rfMRI connectivity (ICA100 edge 742) | 3.4622E-01 | 1.8114E-02 | Not significant |
| 1140 | GCST90006287 | rfMRI connectivity (ICA100 edge 1434) | 3.4658E-01 | 1.8130E-02 | Not significant |
| 1141 | GCST90002967 | aparc-a2009s lh volume Pole-temporal | 3.4661E-01 | 1.8146E-02 | Not significant |
| 1142 | GCST90004934 | rfMRI connectivity (ICA100 edge 81) | 3.4665E-01 | 1.8162E-02 | Not significant |
| 1143 | GCST90004429 | IDP dMRI TBSS OD Posterior corona radiata L | 3.4666E-01 | 1.8177E-02 | Not significant |
| 1144 | GCST90006131 | rfMRI connectivity (ICA100 edge 1278) | 3.4682E-01 | 1.8193E-02 | Not significant |
| 1145 | GCST90005155 | rfMRI connectivity (ICA100 edge 302) | 3.4683E-01 | 1.8209E-02 | Not significant |
| 1146 | GCST90003682 | aparc-a2009s rh thickness G+S-cingul-Ant | 3.4713E-01 | 1.8225E-02 | Not significant |
| 1147 | GCST90004158 | IDP dMRI TBSS L2 Cingulum cingulate gyrus L | 3.4719E-01 | 1.8241E-02 | Not significant |
| 1148 | GCST90002985 | aparc-a2009s lh volume S-oc-temp-med+Lingual | 3.4720E-01 | 1.8257E-02 | Not significant |
| 1149 | GCST90004806 | rfMRI connectivity (ICA25 edge 163) | 3.4737E-01 | 1.8273E-02 | Not significant |
| 1150 | GCST90005093 | rfMRI connectivity (ICA100 edge 240) | 3.4776E-01 | 1.8289E-02 | Not significant |
| 1151 | GCST90004553 | IDP tfMRI 90th-percentile BOLD shapes | 3.4799E-01 | 1.8305E-02 | Not significant |
| 1152 | GCST90005046 | rfMRI connectivity (ICA100 edge 193) | 3.4828E-01 | 1.8321E-02 | Not significant |
| 1153 | GCST90005604 | rfMRI connectivity (ICA100 edge 751) | 3.4856E-01 | 1.8337E-02 | Not significant |
| 1154 | GCST90004799 | rfMRI connectivity (ICA25 edge 156) | 3.4859E-01 | 1.8352E-02 | Not significant |
| 1155 | GCST90005068 | rfMRI connectivity (ICA100 edge 215) | 3.4914E-01 | 1.8368E-02 | Not significant |
| 1156 | GCST90005443 | rfMRI connectivity (ICA100 edge 590) | 3.4944E-01 | 1.8384E-02 | Not significant |
| 1157 | GCST90002894 | aparc-DKTatlas rh volume caudalanteriorcingulate | 3.4946E-01 | 1.8400E-02 | Not significant |
| 1158 | GCST90004769 | rfMRI connectivity (ICA25 edge 126) | 3.5003E-01 | 1.8416E-02 | Not significant |
| 1159 | GCST90004532 | IDP dMRI ProbtrackX ISOVF cgh r | 3.5092E-01 | 1.8432E-02 | Not significant |
| 1160 | GCST90003385 | aparc-a2009s rh area G-front-middle | 3.5110E-01 | 1.8448E-02 | Not significant |
| 1161 | GCST90005712 | rfMRI connectivity (ICA100 edge 859) | 3.5127E-01 | 1.8464E-02 | Not significant |
| 1162 | GCST90005055 | rfMRI connectivity (ICA100 edge 202) | 3.5145E-01 | 1.8480E-02 | Not significant |
| 1163 | GCST90004857 | rfMRI connectivity (ICA100 edge 4) | 3.5158E-01 | 1.8496E-02 | Not significant |
| 1164 | GCST90005418 | rfMRI connectivity (ICA100 edge 565) | 3.5162E-01 | 1.8511E-02 | Not significant |
| 1165 | GCST90005807 | rfMRI connectivity (ICA100 edge 954) | 3.5163E-01 | 1.8527E-02 | Not significant |
| 1166 | GCST90005084 | rfMRI connectivity (ICA100 edge 231) | 3.5174E-01 | 1.8543E-02 | Not significant |
| 1167 | GCST90003627 | aparc-a2009s lh thickness G-pariet-inf-Angular | 3.5180E-01 | 1.8559E-02 | Not significant |
| 1168 | GCST90003325 | aparc-a2009s lh area G-precentral | 3.5199E-01 | 1.8575E-02 | Not significant |
| 1169 | GCST90003941 | IDP dMRI ProbtrackX FA mcp | 3.5223E-01 | 1.8591E-02 | Not significant |
| 1170 | GCST90003999 | IDP dMRI TBSS MO Tapetum L | 3.5239E-01 | 1.8607E-02 | Not significant |
| 1171 | GCST90006360 | QC dMRI eddy outlier slices | 3.5318E-01 | 1.8623E-02 | Not significant |
| 1172 | GCST90005889 | rfMRI connectivity (ICA100 edge 1036) | 3.5412E-01 | 1.8639E-02 | Not significant |
| 1173 | GCST90004052 | IDP dMRI TBSS MD Superior corona radiata L | 3.5446E-01 | 1.8655E-02 | Not significant |
| 1174 | GCST90005221 | rfMRI connectivity (ICA100 edge 368) | 3.5471E-01 | 1.8670E-02 | Not significant |
| 1175 | GCST90005625 | rfMRI connectivity (ICA100 edge 772) | 3.5477E-01 | 1.8686E-02 | Not significant |
| 1176 | GCST90005577 | rfMRI connectivity (ICA100 edge 724) | 3.5509E-01 | 1.8702E-02 | Not significant |
| 1177 | GCST90005552 | rfMRI connectivity (ICA100 edge 699) | 3.5543E-01 | 1.8718E-02 | Not significant |
| 1178 | GCST90003538 | BA-exvivo rh thickness MT | 3.5556E-01 | 1.8734E-02 | Not significant |
| 1179 | GCST90002652 | AmygNuclei lh volume Central-nucleus | 3.5560E-01 | 1.8750E-02 | Not significant |
| 1180 | GCST90005072 | rfMRI connectivity (ICA100 edge 219) | 3.5574E-01 | 1.8766E-02 | Not significant |
| 1181 | GCST90005308 | rfMRI connectivity (ICA100 edge 455) | 3.5588E-01 | 1.8782E-02 | Not significant |
| 1182 | GCST90006018 | rfMRI connectivity (ICA100 edge 1165) | 3.5612E-01 | 1.8798E-02 | Not significant |
| 1183 | GCST90002860 | BA-exvivo rh volume MT | 3.5635E-01 | 1.8814E-02 | Not significant |
| 1184 | GCST90002706 | HippSubfield rh volume fimbria | 3.5644E-01 | 1.8830E-02 | Not significant |
| 1185 | GCST90002964 | aparc-a2009s lh volume Lat-Fis-ant-Vertical | 3.5653E-01 | 1.8845E-02 | Not significant |
| 1186 | GCST90003258 | aparc-DKTatlas lh area rostralanteriorcingulate | 3.5660E-01 | 1.8861E-02 | Not significant |
| 1187 | GCST90003712 | aparc-a2009s rh thickness G-temp-sup-Plan-tempo | 3.5685E-01 | 1.8877E-02 | Not significant |
| 1188 | GCST90004007 | IDP dMRI ProbtrackX MO cgh r | 3.5687E-01 | 1.8893E-02 | Not significant |
| 1189 | GCST90005634 | rfMRI connectivity (ICA100 edge 781) | 3.5720E-01 | 1.8909E-02 | Not significant |
| 1190 | GCST90003950 | IDP dMRI ProbtrackX FA unc l | 3.5737E-01 | 1.8925E-02 | Not significant |
| 1191 | GCST90002712 | ThalamNuclei lh volume MGN | 3.5746E-01 | 1.8941E-02 | Not significant |
| 1192 | GCST90004040 | IDP dMRI TBSS MD Superior cerebellar peduncle L | 3.5760E-01 | 1.8957E-02 | Not significant |
| 1193 | GCST90003035 | aparc-a2009s rh volume G-temporal-inf | 3.5763E-01 | 1.8973E-02 | Not significant |
| 1194 | GCST90003280 | aparc-DKTatlas rh area paracentral | 3.5834E-01 | 1.8989E-02 | Not significant |
| 1195 | GCST90004996 | rfMRI connectivity (ICA100 edge 143) | 3.5872E-01 | 1.9004E-02 | Not significant |
| 1196 | GCST90004792 | rfMRI connectivity (ICA25 edge 149) | 3.5888E-01 | 1.9020E-02 | Not significant |
| 1197 | GCST90004917 | rfMRI connectivity (ICA100 edge 64) | 3.5895E-01 | 1.9036E-02 | Not significant |
| 1198 | GCST90004642 | rfMRI amplitudes (ICA100 node 54) | 3.5898E-01 | 1.9052E-02 | Not significant |
| 1199 | GCST90003118 | aparc-Desikan rh area lateralorbitofrontal | 3.5912E-01 | 1.9068E-02 | Not significant |
| 1200 | GCST90004767 | rfMRI connectivity (ICA25 edge 124) | 3.5924E-01 | 1.9084E-02 | Not significant |
| 1201 | GCST90006323 | rfMRI connectivity (ICA100 edge 1470) | 3.5938E-01 | 1.9100E-02 | Not significant |
| 1202 | GCST90005225 | rfMRI connectivity (ICA100 edge 372) | 3.5967E-01 | 1.9116E-02 | Not significant |
| 1203 | GCST90005321 | rfMRI connectivity (ICA100 edge 468) | 3.5968E-01 | 1.9132E-02 | Not significant |
| 1204 | GCST90004205 | IDP dMRI TBSS L3 Cingulum cingulate gyrus R | 3.6042E-01 | 1.9148E-02 | Not significant |
| 1205 | GCST90003736 | aparc-a2009s rh thickness S-oc-temp-lat | 3.6047E-01 | 1.9163E-02 | Not significant |
| 1206 | GCST90004657 | rfMRI connectivity (ICA25 edge 14) | 3.6131E-01 | 1.9179E-02 | Not significant |
| 1207 | GCST90003657 | aparc-a2009s lh thickness S-interm-prim-Jensen | 3.6158E-01 | 1.9195E-02 | Not significant |
| 1208 | GCST90003818 | wg lh intensity-contrast rostralmiddlefrontal | 3.6178E-01 | 1.9211E-02 | Not significant |
| 1209 | GCST90005208 | rfMRI connectivity (ICA100 edge 355) | 3.6205E-01 | 1.9227E-02 | Not significant |
| 1210 | GCST90005642 | rfMRI connectivity (ICA100 edge 789) | 3.6227E-01 | 1.9243E-02 | Not significant |
| 1211 | GCST90004682 | rfMRI connectivity (ICA25 edge 39) | 3.6244E-01 | 1.9259E-02 | Not significant |
| 1212 | GCST90006156 | rfMRI connectivity (ICA100 edge 1303) | 3.6259E-01 | 1.9275E-02 | Not significant |
| 1213 | GCST90005824 | rfMRI connectivity (ICA100 edge 971) | 3.6304E-01 | 1.9291E-02 | Not significant |
| 1214 | GCST90002701 | HippSubfield rh volume GC-ML-DG-head | 3.6310E-01 | 1.9307E-02 | Not significant |
| 1215 | GCST90002765 | Brainstem global volume Pons | 3.6336E-01 | 1.9323E-02 | Not significant |
| 1216 | GCST90003724 | aparc-a2009s rh thickness S-circular-insula-inf | 3.6341E-01 | 1.9338E-02 | Not significant |
| 1217 | GCST90003296 | aparc-DKTatlas rh area insula | 3.6352E-01 | 1.9354E-02 | Not significant |
| 1218 | GCST90004703 | rfMRI connectivity (ICA25 edge 60) | 3.6371E-01 | 1.9370E-02 | Not significant |
| 1219 | GCST90005147 | rfMRI connectivity (ICA100 edge 294) | 3.6374E-01 | 1.9386E-02 | Not significant |
| 1220 | GCST90003257 | aparc-DKTatlas lh area precuneus | 3.6379E-01 | 1.9402E-02 | Not significant |
| 1221 | GCST90003922 | IDP dMRI TBSS FA Uncinate fasciculus L | 3.6382E-01 | 1.9418E-02 | Not significant |
| 1222 | GCST90003755 | aseg global intensity CSF | 3.6399E-01 | 1.9434E-02 | Not significant |
| 1223 | GCST90004962 | rfMRI connectivity (ICA100 edge 109) | 3.6413E-01 | 1.9450E-02 | Not significant |
| 1224 | GCST90003996 | IDP dMRI TBSS MO Uncinate fasciculus R | 3.6451E-01 | 1.9466E-02 | Not significant |
| 1225 | GCST90005292 | rfMRI connectivity (ICA100 edge 439) | 3.6464E-01 | 1.9482E-02 | Not significant |
| 1226 | GCST90005498 | rfMRI connectivity (ICA100 edge 645) | 3.6472E-01 | 1.9497E-02 | Not significant |
| 1227 | GCST90005999 | rfMRI connectivity (ICA100 edge 1146) | 3.6509E-01 | 1.9513E-02 | Not significant |
| 1228 | GCST90003747 | aparc-a2009s rh thickness S-subparietal | 3.6552E-01 | 1.9529E-02 | Not significant |
| 1229 | GCST90004628 | rfMRI amplitudes (ICA100 node 40) | 3.6597E-01 | 1.9545E-02 | Not significant |
| 1230 | GCST90005535 | rfMRI connectivity (ICA100 edge 682) | 3.6623E-01 | 1.9561E-02 | Not significant |
| 1231 | GCST90003929 | IDP dMRI ProbtrackX FA cgc l | 3.6631E-01 | 1.9577E-02 | Not significant |
| 1232 | GCST90005304 | rfMRI connectivity (ICA100 edge 451) | 3.6781E-01 | 1.9593E-02 | Not significant |
| 1233 | GCST90003533 | BA-exvivo rh thickness BA6 | 3.6815E-01 | 1.9609E-02 | Not significant |
| 1234 | GCST90004175 | IDP dMRI TBSS L3 Splenium of corpus callosum | 3.6866E-01 | 1.9625E-02 | Not significant |
| 1235 | GCST90003248 | aparc-DKTatlas lh area parahippocampal | 3.6869E-01 | 1.9641E-02 | Not significant |
| 1236 | GCST90006123 | rfMRI connectivity (ICA100 edge 1270) | 3.6938E-01 | 1.9656E-02 | Not significant |
| 1237 | GCST90003065 | aparc-a2009s rh volume S-postcentral | 3.6957E-01 | 1.9672E-02 | Not significant |
| 1238 | GCST90003028 | aparc-a2009s rh volume G-precuneus | 3.6975E-01 | 1.9688E-02 | Not significant |
| 1239 | GCST90004421 | IDP dMRI TBSS OD Posterior limb of internal capsule L | 3.6989E-01 | 1.9704E-02 | Not significant |
| 1240 | GCST90002845 | BA-exvivo lh volume V2 | 3.7000E-01 | 1.9720E-02 | Not significant |
| 1241 | GCST90002493 | IDP T1 FAST ROIs L latocc cortex sup | 3.7005E-01 | 1.9736E-02 | Not significant |
| 1242 | GCST90002460 | IDP T1 FAST ROIs R inf front gyrus parstri | 3.7009E-01 | 1.9752E-02 | Not significant |
| 1243 | GCST90003883 | IDP dMRI TBSS FA Corticospinal tract R | 3.7012E-01 | 1.9768E-02 | Not significant |
| 1244 | GCST90003474 | aparc-Desikan lh thickness superiortemporal | 3.7048E-01 | 1.9784E-02 | Not significant |
| 1245 | GCST90003403 | aparc-a2009s rh area G-temp-sup-G-T-transv | 3.7058E-01 | 1.9800E-02 | Not significant |
| 1246 | GCST90004517 | IDP dMRI TBSS ISOVF Superior longitudinal fasciculus R | 3.7062E-01 | 1.9816E-02 | Not significant |
| 1247 | GCST90003119 | aparc-Desikan rh area lingual | 3.7063E-01 | 1.9831E-02 | Not significant |
| 1248 | GCST90004251 | IDP dMRI ProbtrackX L1 cgc r | 3.7089E-01 | 1.9847E-02 | Not significant |
| 1249 | GCST90005784 | rfMRI connectivity (ICA100 edge 931) | 3.7096E-01 | 1.9863E-02 | Not significant |
| 1250 | GCST90005553 | rfMRI connectivity (ICA100 edge 700) | 3.7114E-01 | 1.9879E-02 | Not significant |
| 1251 | GCST90003836 | wg rh intensity-contrast isthmuscingulate | 3.7118E-01 | 1.9895E-02 | Not significant |
| 1252 | GCST90003031 | aparc-a2009s rh volume G-temp-sup-G-T-transv | 3.7134E-01 | 1.9911E-02 | Not significant |
| 1253 | GCST90003511 | aparc-Desikan rh thickness transversetemporal | 3.7279E-01 | 1.9927E-02 | Not significant |
| 1254 | GCST90002934 | aparc-a2009s lh volume G-cingul-Post-ventral | 3.7291E-01 | 1.9943E-02 | Not significant |
| 1255 | GCST90002846 | BA-exvivo lh volume MT | 3.7305E-01 | 1.9959E-02 | Not significant |
| 1256 | GCST90003339 | aparc-a2009s lh area Pole-temporal | 3.7322E-01 | 1.9975E-02 | Not significant |
| 1257 | GCST90004263 | IDP dMRI ProbtrackX L1 ml l | 3.7350E-01 | 1.9990E-02 | Not significant |
| 1258 | GCST90006188 | rfMRI connectivity (ICA100 edge 1335) | 3.7421E-01 | 2.0006E-02 | Not significant |
| 1259 | GCST90005014 | rfMRI connectivity (ICA100 edge 161) | 3.7426E-01 | 2.0022E-02 | Not significant |
| 1260 | GCST90004258 | IDP dMRI ProbtrackX L1 ifo l | 3.7429E-01 | 2.0038E-02 | Not significant |
| 1261 | GCST90003277 | aparc-DKTatlas rh area medialorbitofrontal | 3.7433E-01 | 2.0054E-02 | Not significant |
| 1262 | GCST90005268 | rfMRI connectivity (ICA100 edge 415) | 3.7493E-01 | 2.0070E-02 | Not significant |
| 1263 | GCST90003263 | aparc-DKTatlas lh area supramarginal | 3.7523E-01 | 2.0086E-02 | Not significant |
| 1264 | GCST90003591 | aparc-DKTatlas rh thickness postcentral | 3.7536E-01 | 2.0102E-02 | Not significant |
| 1265 | GCST90004414 | IDP dMRI TBSS OD Superior cerebellar peduncle R | 3.7548E-01 | 2.0118E-02 | Not significant |
| 1266 | GCST90004795 | rfMRI connectivity (ICA25 edge 152) | 3.7640E-01 | 2.0134E-02 | Not significant |
| 1267 | GCST90004100 | IDP dMRI TBSS L1 Superior corona radiata L | 3.7650E-01 | 2.0149E-02 | Not significant |
| 1268 | GCST90002993 | aparc-a2009s lh volume S-precentral-sup-part | 3.7687E-01 | 2.0165E-02 | Not significant |
| 1269 | GCST90004086 | IDP dMRI TBSS L1 Inferior cerebellar peduncle L | 3.7690E-01 | 2.0181E-02 | Not significant |
| 1270 | GCST90004095 | IDP dMRI TBSS L1 Retrolenticular part of internal capsule R | 3.7706E-01 | 2.0197E-02 | Not significant |
| 1271 | GCST90004488 | IDP dMRI TBSS ISOVF Inferior cerebellar peduncle L | 3.7709E-01 | 2.0213E-02 | Not significant |
| 1272 | GCST90003135 | aparc-Desikan rh area superiorparietal | 3.7752E-01 | 2.0229E-02 | Not significant |
| 1273 | GCST90003943 | IDP dMRI ProbtrackX FA ml r | 3.7840E-01 | 2.0245E-02 | Not significant |
| 1274 | GCST90006154 | rfMRI connectivity (ICA100 edge 1301) | 3.7863E-01 | 2.0261E-02 | Not significant |
| 1275 | GCST90006093 | rfMRI connectivity (ICA100 edge 1240) | 3.7914E-01 | 2.0277E-02 | Not significant |
| 1276 | GCST90003568 | aparc-DKTatlas lh thickness superiortemporal | 3.7923E-01 | 2.0293E-02 | Not significant |
| 1277 | GCST90006125 | rfMRI connectivity (ICA100 edge 1272) | 3.7937E-01 | 2.0309E-02 | Not significant |
| 1278 | GCST90003387 | aparc-a2009s rh area G-Ins-lg+S-cent-ins | 3.7980E-01 | 2.0324E-02 | Not significant |
| 1279 | GCST90005412 | rfMRI connectivity (ICA100 edge 559) | 3.7991E-01 | 2.0340E-02 | Not significant |
| 1280 | GCST90005866 | rfMRI connectivity (ICA100 edge 1013) | 3.7992E-01 | 2.0356E-02 | Not significant |
| 1281 | GCST90005329 | rfMRI connectivity (ICA100 edge 476) | 3.7998E-01 | 2.0372E-02 | Not significant |
| 1282 | GCST90002642 | aseg rh volume Amygdala | 3.8027E-01 | 2.0388E-02 | Not significant |
| 1283 | GCST90004180 | IDP dMRI TBSS L3 Medial lemniscus L | 3.8035E-01 | 2.0404E-02 | Not significant |
| 1284 | GCST90003026 | aparc-a2009s rh volume G-postcentral | 3.8047E-01 | 2.0420E-02 | Not significant |
| 1285 | GCST90005244 | rfMRI connectivity (ICA100 edge 391) | 3.8055E-01 | 2.0436E-02 | Not significant |
| 1286 | GCST90005854 | rfMRI connectivity (ICA100 edge 1001) | 3.8124E-01 | 2.0452E-02 | Not significant |
| 1287 | GCST90003456 | aparc-Desikan lh thickness lateralorbitofrontal | 3.8135E-01 | 2.0468E-02 | Not significant |
| 1288 | GCST90004199 | IDP dMRI TBSS L3 Posterior thalamic radiation R | 3.8151E-01 | 2.0483E-02 | Not significant |
| 1289 | GCST90005792 | rfMRI connectivity (ICA100 edge 939) | 3.8167E-01 | 2.0499E-02 | Not significant |
| 1290 | GCST90006280 | rfMRI connectivity (ICA100 edge 1427) | 3.8185E-01 | 2.0515E-02 | Not significant |
| 1291 | GCST90004680 | rfMRI connectivity (ICA25 edge 37) | 3.8221E-01 | 2.0531E-02 | Not significant |
| 1292 | GCST90003991 | IDP dMRI TBSS MO Fornix cres+Stria terminalis L | 3.8227E-01 | 2.0547E-02 | Not significant |
| 1293 | GCST90004436 | IDP dMRI TBSS OD Cingulum cingulate gyrus R | 3.8231E-01 | 2.0563E-02 | Not significant |
| 1294 | GCST90005402 | rfMRI connectivity (ICA100 edge 549) | 3.8247E-01 | 2.0579E-02 | Not significant |
| 1295 | GCST90003457 | aparc-Desikan lh thickness lingual | 3.8287E-01 | 2.0595E-02 | Not significant |
| 1296 | GCST90005943 | rfMRI connectivity (ICA100 edge 1090) | 3.8296E-01 | 2.0611E-02 | Not significant |
| 1297 | GCST90005282 | rfMRI connectivity (ICA100 edge 429) | 3.8300E-01 | 2.0627E-02 | Not significant |
| 1298 | GCST90004651 | rfMRI connectivity (ICA25 edge 8) | 3.8329E-01 | 2.0642E-02 | Not significant |
| 1299 | GCST90003813 | wg lh intensity-contrast postcentral | 3.8331E-01 | 2.0658E-02 | Not significant |
| 1300 | GCST90006029 | rfMRI connectivity (ICA100 edge 1176) | 3.8335E-01 | 2.0674E-02 | Not significant |
| 1301 | GCST90005986 | rfMRI connectivity (ICA100 edge 1133) | 3.8357E-01 | 2.0690E-02 | Not significant |
| 1302 | GCST90005516 | rfMRI connectivity (ICA100 edge 663) | 3.8361E-01 | 2.0706E-02 | Not significant |
| 1303 | GCST90003039 | aparc-a2009s rh volume Lat-Fis-post | 3.8363E-01 | 2.0722E-02 | Not significant |
| 1304 | GCST90005665 | rfMRI connectivity (ICA100 edge 812) | 3.8380E-01 | 2.0738E-02 | Not significant |
| 1305 | GCST90005411 | rfMRI connectivity (ICA100 edge 558) | 3.8393E-01 | 2.0754E-02 | Not significant |
| 1306 | GCST90005818 | rfMRI connectivity (ICA100 edge 965) | 3.8420E-01 | 2.0770E-02 | Not significant |
| 1307 | GCST90004662 | rfMRI connectivity (ICA25 edge 19) | 3.8430E-01 | 2.0786E-02 | Not significant |
| 1308 | GCST90003952 | IDP dMRI TBSS MO Middle cerebellar peduncle | 3.8463E-01 | 2.0802E-02 | Not significant |
| 1309 | GCST90005968 | rfMRI connectivity (ICA100 edge 1115) | 3.8467E-01 | 2.0817E-02 | Not significant |
| 1310 | GCST90003809 | wg lh intensity-contrast parsopercularis | 3.8545E-01 | 2.0833E-02 | Not significant |
| 1311 | GCST90002890 | aparc-DKTatlas lh volume superiortemporal | 3.8547E-01 | 2.0849E-02 | Not significant |
| 1312 | GCST90004031 | IDP dMRI TBSS MD Splenium of corpus callosum | 3.8562E-01 | 2.0865E-02 | Not significant |
| 1313 | GCST90004253 | IDP dMRI ProbtrackX L1 cgh r | 3.8593E-01 | 2.0881E-02 | Not significant |
| 1314 | GCST90004090 | IDP dMRI TBSS L1 Cerebral peduncle L | 3.8619E-01 | 2.0897E-02 | Not significant |
| 1315 | GCST90003479 | aparc-Desikan rh thickness GlobalMeanThickness | 3.8624E-01 | 2.0913E-02 | Not significant |
| 1316 | GCST90005579 | rfMRI connectivity (ICA100 edge 726) | 3.8660E-01 | 2.0929E-02 | Not significant |
| 1317 | GCST90003336 | aparc-a2009s lh area Lat-Fis-ant-Vertical | 3.8674E-01 | 2.0945E-02 | Not significant |
| 1318 | GCST90005319 | rfMRI connectivity (ICA100 edge 466) | 3.8739E-01 | 2.0961E-02 | Not significant |
| 1319 | GCST90004284 | IDP dMRI ProbtrackX L2 fmi | 3.8748E-01 | 2.0976E-02 | Not significant |
| 1320 | GCST90004892 | rfMRI connectivity (ICA100 edge 39) | 3.8756E-01 | 2.0992E-02 | Not significant |
| 1321 | GCST90004825 | rfMRI connectivity (ICA25 edge 182) | 3.8759E-01 | 2.1008E-02 | Not significant |
| 1322 | GCST90005495 | rfMRI connectivity (ICA100 edge 642) | 3.8823E-01 | 2.1024E-02 | Not significant |
| 1323 | GCST90004404 | IDP dMRI TBSS OD Genu of corpus callosum | 3.8845E-01 | 2.1040E-02 | Not significant |
| 1324 | GCST90005732 | rfMRI connectivity (ICA100 edge 879) | 3.8859E-01 | 2.1056E-02 | Not significant |
| 1325 | GCST90006218 | rfMRI connectivity (ICA100 edge 1365) | 3.8900E-01 | 2.1072E-02 | Not significant |
| 1326 | GCST90002969 | aparc-a2009s lh volume S-central | 3.8923E-01 | 2.1088E-02 | Not significant |
| 1327 | GCST90003559 | aparc-DKTatlas lh thickness pericalcarine | 3.8954E-01 | 2.1104E-02 | Not significant |
| 1328 | GCST90004117 | IDP dMRI TBSS L1 Superior fronto-occipital fasciculus R | 3.8996E-01 | 2.1120E-02 | Not significant |
| 1329 | GCST90004848 | rfMRI connectivity (ICA25 edge 205) | 3.9044E-01 | 2.1135E-02 | Not significant |
| 1330 | GCST90003293 | aparc-DKTatlas rh area superiortemporal | 3.9103E-01 | 2.1151E-02 | Not significant |
| 1331 | GCST90003237 | aparc-DKTatlas lh area cuneus | 3.9111E-01 | 2.1167E-02 | Not significant |
| 1332 | GCST90004065 | IDP dMRI TBSS MD Fornix cres+Stria terminalis R | 3.9186E-01 | 2.1183E-02 | Not significant |
| 1333 | GCST90004616 | rfMRI amplitudes (ICA100 node 28) | 3.9216E-01 | 2.1199E-02 | Not significant |
| 1334 | GCST90004183 | IDP dMRI TBSS L3 Superior cerebellar peduncle R | 3.9222E-01 | 2.1215E-02 | Not significant |
| 1335 | GCST90002557 | IDP T1 FAST ROIs L amygdala | 3.9257E-01 | 2.1231E-02 | Not significant |
| 1336 | GCST90003447 | aparc-Desikan lh thickness caudalanteriorcingulate | 3.9279E-01 | 2.1247E-02 | Not significant |
| 1337 | GCST90003410 | aparc-a2009s rh area Lat-Fis-ant-Vertical | 3.9296E-01 | 2.1263E-02 | Not significant |
| 1338 | GCST90004123 | IDP dMRI TBSS L2 Middle cerebellar peduncle | 3.9296E-01 | 2.1279E-02 | Not significant |
| 1339 | GCST90003069 | aparc-a2009s rh volume S-subparietal | 3.9301E-01 | 2.1295E-02 | Not significant |
| 1340 | GCST90002802 | aparc-Desikan rh volume bankssts | 3.9327E-01 | 2.1310E-02 | Not significant |
| 1341 | GCST90004813 | rfMRI connectivity (ICA25 edge 170) | 3.9342E-01 | 2.1326E-02 | Not significant |
| 1342 | GCST90004118 | IDP dMRI TBSS L1 Superior fronto-occipital fasciculus L | 3.9362E-01 | 2.1342E-02 | Not significant |
| 1343 | GCST90004862 | rfMRI connectivity (ICA100 edge 9) | 3.9449E-01 | 2.1358E-02 | Not significant |
| 1344 | GCST90004276 | IDP dMRI ProbtrackX L2 atr r | 3.9467E-01 | 2.1374E-02 | Not significant |
| 1345 | GCST90003024 | aparc-a2009s rh volume G-pariet-inf-Supramar | 3.9533E-01 | 2.1390E-02 | Not significant |
| 1346 | GCST90002853 | BA-exvivo rh volume BA4a | 3.9545E-01 | 2.1406E-02 | Not significant |
| 1347 | GCST90003833 | wg rh intensity-contrast fusiform | 3.9592E-01 | 2.1422E-02 | Not significant |
| 1348 | GCST90004519 | IDP dMRI TBSS ISOVF Superior fronto-occipital fasciculus R | 3.9594E-01 | 2.1438E-02 | Not significant |
| 1349 | GCST90003737 | aparc-a2009s rh thickness S-oc-temp-med+Lingual | 3.9595E-01 | 2.1454E-02 | Not significant |
| 1350 | GCST90004986 | rfMRI connectivity (ICA100 edge 133) | 3.9614E-01 | 2.1469E-02 | Not significant |
| 1351 | GCST90005738 | rfMRI connectivity (ICA100 edge 885) | 3.9670E-01 | 2.1485E-02 | Not significant |
| 1352 | GCST90005584 | rfMRI connectivity (ICA100 edge 731) | 3.9762E-01 | 2.1501E-02 | Not significant |
| 1353 | GCST90005384 | rfMRI connectivity (ICA100 edge 531) | 3.9766E-01 | 2.1517E-02 | Not significant |
| 1354 | GCST90002683 | HippSubfield lh volume CA4-body | 3.9778E-01 | 2.1533E-02 | Not significant |
| 1355 | GCST90006021 | rfMRI connectivity (ICA100 edge 1168) | 3.9795E-01 | 2.1549E-02 | Not significant |
| 1356 | GCST90005864 | rfMRI connectivity (ICA100 edge 1011) | 3.9813E-01 | 2.1565E-02 | Not significant |
| 1357 | GCST90003093 | aparc-Desikan lh area pericalcarine | 3.9836E-01 | 2.1581E-02 | Not significant |
| 1358 | GCST90003214 | BA-exvivo lh area BA44 | 3.9884E-01 | 2.1597E-02 | Not significant |
| 1359 | GCST90005105 | rfMRI connectivity (ICA100 edge 252) | 3.9886E-01 | 2.1613E-02 | Not significant |
| 1360 | GCST90002869 | aparc-DKTatlas lh volume inferiortemporal | 3.9895E-01 | 2.1628E-02 | Not significant |
| 1361 | GCST90003260 | aparc-DKTatlas lh area superiorfrontal | 3.9938E-01 | 2.1644E-02 | Not significant |
| 1362 | GCST90004551 | IDP dMRI ProbtrackX ISOVF unc r | 3.9956E-01 | 2.1660E-02 | Not significant |
| 1363 | GCST90002716 | ThalamNuclei lh volume L-Sg | 3.9963E-01 | 2.1676E-02 | Not significant |
| 1364 | GCST90005554 | rfMRI connectivity (ICA100 edge 701) | 3.9986E-01 | 2.1692E-02 | Not significant |
| 1365 | GCST90005621 | rfMRI connectivity (ICA100 edge 768) | 4.0000E-01 | 2.1708E-02 | Not significant |
| 1366 | GCST90004203 | IDP dMRI TBSS L3 External capsule R | 4.0008E-01 | 2.1724E-02 | Not significant |
| 1367 | GCST90002723 | ThalamNuclei lh volume VAmc | 4.0020E-01 | 2.1740E-02 | Not significant |
| 1368 | GCST90005510 | rfMRI connectivity (ICA100 edge 657) | 4.0077E-01 | 2.1756E-02 | Not significant |
| 1369 | GCST90003534 | BA-exvivo rh thickness BA44 | 4.0102E-01 | 2.1772E-02 | Not significant |
| 1370 | GCST90004927 | rfMRI connectivity (ICA100 edge 74) | 4.0111E-01 | 2.1788E-02 | Not significant |
| 1371 | GCST90005574 | rfMRI connectivity (ICA100 edge 721) | 4.0126E-01 | 2.1803E-02 | Not significant |
| 1372 | GCST90005546 | rfMRI connectivity (ICA100 edge 693) | 4.0134E-01 | 2.1819E-02 | Not significant |
| 1373 | GCST90003144 | aparc-pial lh area caudalmiddlefrontal | 4.0139E-01 | 2.1835E-02 | Not significant |
| 1374 | GCST90004600 | rfMRI amplitudes (ICA100 node 12) | 4.0162E-01 | 2.1851E-02 | Not significant |
| 1375 | GCST90004749 | rfMRI connectivity (ICA25 edge 106) | 4.0169E-01 | 2.1867E-02 | Not significant |
| 1376 | GCST90003872 | IDP SWI T2star right hippocampus | 4.0227E-01 | 2.1883E-02 | Not significant |
| 1377 | GCST90004113 | IDP dMRI TBSS L1 Fornix cres+Stria terminalis R | 4.0253E-01 | 2.1899E-02 | Not significant |
| 1378 | GCST90005799 | rfMRI connectivity (ICA100 edge 946) | 4.0294E-01 | 2.1915E-02 | Not significant |
| 1379 | GCST90003803 | wg lh intensity-contrast lateralorbitofrontal | 4.0399E-01 | 2.1931E-02 | Not significant |
| 1380 | GCST90003677 | aparc-a2009s rh thickness G+S-frontomargin | 4.0402E-01 | 2.1947E-02 | Not significant |
| 1381 | GCST90003351 | aparc-a2009s lh area S-interm-prim-Jensen | 4.0418E-01 | 2.1962E-02 | Not significant |
| 1382 | GCST90004325 | IDP dMRI ProbtrackX L3 unc l | 4.0468E-01 | 2.1978E-02 | Not significant |
| 1383 | GCST90004080 | IDP dMRI TBSS L1 Fornix | 4.0490E-01 | 2.1994E-02 | Not significant |
| 1384 | GCST90002944 | aparc-a2009s lh volume G-occipital-sup | 4.0520E-01 | 2.2010E-02 | Not significant |
| 1385 | GCST90003486 | aparc-Desikan rh thickness inferiorparietal | 4.0540E-01 | 2.2026E-02 | Not significant |
| 1386 | GCST90005416 | rfMRI connectivity (ICA100 edge 563) | 4.0570E-01 | 2.2042E-02 | Not significant |
| 1387 | GCST90003827 | wg rh intensity-contrast unknown | 4.0613E-01 | 2.2058E-02 | Not significant |
| 1388 | GCST90003903 | IDP dMRI TBSS FA Posterior corona radiata R | 4.0614E-01 | 2.2074E-02 | Not significant |
| 1389 | GCST90005065 | rfMRI connectivity (ICA100 edge 212) | 4.0621E-01 | 2.2090E-02 | Not significant |
| 1390 | GCST90003884 | IDP dMRI TBSS FA Corticospinal tract L | 4.0634E-01 | 2.2106E-02 | Not significant |
| 1391 | GCST90005643 | rfMRI connectivity (ICA100 edge 790) | 4.0649E-01 | 2.2122E-02 | Not significant |
| 1392 | GCST90002820 | aparc-Desikan rh volume parstriangularis | 4.0650E-01 | 2.2137E-02 | Not significant |
| 1393 | GCST90004402 | IDP dMRI TBSS OD Middle cerebellar peduncle | 4.0652E-01 | 2.2153E-02 | Not significant |
| 1394 | GCST90005285 | rfMRI connectivity (ICA100 edge 432) | 4.0654E-01 | 2.2169E-02 | Not significant |
| 1395 | GCST90006271 | rfMRI connectivity (ICA100 edge 1418) | 4.0703E-01 | 2.2185E-02 | Not significant |
| 1396 | GCST90003429 | aparc-a2009s rh area S-occipital-ant | 4.0723E-01 | 2.2201E-02 | Not significant |
| 1397 | GCST90005550 | rfMRI connectivity (ICA100 edge 697) | 4.0724E-01 | 2.2217E-02 | Not significant |
| 1398 | GCST90003366 | aparc-a2009s lh area S-suborbital | 4.0783E-01 | 2.2233E-02 | Not significant |
| 1399 | GCST90006338 | rfMRI connectivity (ICA100 edge 1485) | 4.0784E-01 | 2.2249E-02 | Not significant |
| 1400 | GCST90005837 | rfMRI connectivity (ICA100 edge 984) | 4.0926E-01 | 2.2265E-02 | Not significant |
| 1401 | GCST90006149 | rfMRI connectivity (ICA100 edge 1296) | 4.0979E-01 | 2.2281E-02 | Not significant |
| 1402 | GCST90002989 | aparc-a2009s lh volume S-parieto-occipital | 4.0986E-01 | 2.2296E-02 | Not significant |
| 1403 | GCST90003775 | aseg lh intensity VentralDC | 4.1019E-01 | 2.2312E-02 | Not significant |
| 1404 | GCST90005825 | rfMRI connectivity (ICA100 edge 972) | 4.1049E-01 | 2.2328E-02 | Not significant |
| 1405 | GCST90002984 | aparc-a2009s lh volume S-oc-temp-lat | 4.1073E-01 | 2.2344E-02 | Not significant |
| 1406 | GCST90003472 | aparc-Desikan lh thickness superiorfrontal | 4.1094E-01 | 2.2360E-02 | Not significant |
| 1407 | GCST90006264 | rfMRI connectivity (ICA100 edge 1411) | 4.1098E-01 | 2.2376E-02 | Not significant |
| 1408 | GCST90005612 | rfMRI connectivity (ICA100 edge 759) | 4.1119E-01 | 2.2392E-02 | Not significant |
| 1409 | GCST90002841 | BA-exvivo lh volume BA6 | 4.1121E-01 | 2.2408E-02 | Not significant |
| 1410 | GCST90005133 | rfMRI connectivity (ICA100 edge 280) | 4.1126E-01 | 2.2424E-02 | Not significant |
| 1411 | GCST90003503 | aparc-Desikan rh thickness precuneus | 4.1131E-01 | 2.2440E-02 | Not significant |
| 1412 | GCST90004133 | IDP dMRI TBSS L2 Inferior cerebellar peduncle R | 4.1140E-01 | 2.2455E-02 | Not significant |
| 1413 | GCST90002455 | IDP T1 FAST ROIs L sup front gyrus | 4.1216E-01 | 2.2471E-02 | Not significant |
| 1414 | GCST90002905 | aparc-DKTatlas rh volume medialorbitofrontal | 4.1251E-01 | 2.2487E-02 | Not significant |
| 1415 | GCST90005541 | rfMRI connectivity (ICA100 edge 688) | 4.1272E-01 | 2.2503E-02 | Not significant |
| 1416 | GCST90004841 | rfMRI connectivity (ICA25 edge 198) | 4.1277E-01 | 2.2519E-02 | Not significant |
| 1417 | GCST90006354 | QC tfMRI-to-T1 linear alignment discrepancy | 4.1298E-01 | 2.2535E-02 | Not significant |
| 1418 | GCST90005358 | rfMRI connectivity (ICA100 edge 505) | 4.1318E-01 | 2.2551E-02 | Not significant |
| 1419 | GCST90003216 | BA-exvivo lh area V1 | 4.1351E-01 | 2.2567E-02 | Not significant |
| 1420 | GCST90004606 | rfMRI amplitudes (ICA100 node 18) | 4.1394E-01 | 2.2583E-02 | Not significant |
| 1421 | GCST90005008 | rfMRI connectivity (ICA100 edge 155) | 4.1420E-01 | 2.2599E-02 | Not significant |
| 1422 | GCST90004014 | IDP dMRI ProbtrackX MO ilf l | 4.1429E-01 | 2.2615E-02 | Not significant |
| 1423 | GCST90005378 | rfMRI connectivity (ICA100 edge 525) | 4.1465E-01 | 2.2630E-02 | Not significant |
| 1424 | GCST90005140 | rfMRI connectivity (ICA100 edge 287) | 4.1479E-01 | 2.2646E-02 | Not significant |
| 1425 | GCST90004864 | rfMRI connectivity (ICA100 edge 11) | 4.1493E-01 | 2.2662E-02 | Not significant |
| 1426 | GCST90005750 | rfMRI connectivity (ICA100 edge 897) | 4.1509E-01 | 2.2678E-02 | Not significant |
| 1427 | GCST90002563 | IDP T1 FAST ROIs R cerebellum I-IV | 4.1528E-01 | 2.2694E-02 | Not significant |
| 1428 | GCST90004111 | IDP dMRI TBSS L1 Cingulum hippocampus R | 4.1615E-01 | 2.2710E-02 | Not significant |
| 1429 | GCST90003143 | aparc-pial lh area caudalanteriorcingulate | 4.1726E-01 | 2.2726E-02 | Not significant |
| 1430 | GCST90002807 | aparc-Desikan rh volume fusiform | 4.1767E-01 | 2.2742E-02 | Not significant |
| 1431 | GCST90002790 | aparc-Desikan lh volume posteriorcingulate | 4.1783E-01 | 2.2758E-02 | Not significant |
| 1432 | GCST90002451 | IDP T1 FAST ROIs L frontal pole | 4.1791E-01 | 2.2774E-02 | Not significant |
| 1433 | GCST90003893 | IDP dMRI TBSS FA Anterior limb of internal capsule R | 4.1824E-01 | 2.2789E-02 | Not significant |
| 1434 | GCST90004091 | IDP dMRI TBSS L1 Anterior limb of internal capsule R | 4.1844E-01 | 2.2805E-02 | Not significant |
| 1435 | GCST90003468 | aparc-Desikan lh thickness precentral | 4.1865E-01 | 2.2821E-02 | Not significant |
| 1436 | GCST90003034 | aparc-a2009s rh volume G-temp-sup-Plan-tempo | 4.1933E-01 | 2.2837E-02 | Not significant |
| 1437 | GCST90002532 | IDP T1 FAST ROIs R front operc cortex | 4.1933E-01 | 2.2853E-02 | Not significant |
| 1438 | GCST90004289 | IDP dMRI ProbtrackX L2 mcp | 4.1995E-01 | 2.2869E-02 | Not significant |
| 1439 | GCST90002446 | IDP T1 FIRST left amygdala volume | 4.2004E-01 | 2.2885E-02 | Not significant |
| 1440 | GCST90003485 | aparc-Desikan rh thickness fusiform | 4.2022E-01 | 2.2901E-02 | Not significant |
| 1441 | GCST90003173 | aparc-pial lh area transversetemporal | 4.2115E-01 | 2.2917E-02 | Not significant |
| 1442 | GCST90003642 | aparc-a2009s lh thickness Lat-Fis-ant-Vertical | 4.2189E-01 | 2.2933E-02 | Not significant |
| 1443 | GCST90002929 | aparc-a2009s lh volume G+S-transv-frontopol | 4.2202E-01 | 2.2948E-02 | Not significant |
| 1444 | GCST90004287 | IDP dMRI ProbtrackX L2 ilf l | 4.2205E-01 | 2.2964E-02 | Not significant |
| 1445 | GCST90004415 | IDP dMRI TBSS OD Superior cerebellar peduncle L | 4.2241E-01 | 2.2980E-02 | Not significant |
| 1446 | GCST90003751 | aseg global intensity 3rd-Ventricle | 4.2252E-01 | 2.2996E-02 | Not significant |
| 1447 | GCST90004341 | IDP dMRI TBSS ICVF Cerebral peduncle R | 4.2444E-01 | 2.3012E-02 | Not significant |
| 1448 | GCST90004484 | IDP dMRI TBSS ISOVF Corticospinal tract L | 4.2453E-01 | 2.3028E-02 | Not significant |
| 1449 | GCST90003298 | aparc-a2009s lh area G+S-occipital-inf | 4.2538E-01 | 2.3044E-02 | Not significant |
| 1450 | GCST90004011 | IDP dMRI ProbtrackX MO fmi | 4.2637E-01 | 2.3060E-02 | Not significant |
| 1451 | GCST90002560 | IDP T1 FAST ROIs R ventral striatum | 4.2643E-01 | 2.3076E-02 | Not significant |
| 1452 | GCST90003071 | aparc-a2009s rh volume S-temporal-sup | 4.2707E-01 | 2.3092E-02 | Not significant |
| 1453 | GCST90002988 | aparc-a2009s lh volume S-orbital-H-Shaped | 4.2708E-01 | 2.3108E-02 | Not significant |
| 1454 | GCST90002503 | IDP T1 FAST ROIs L subcallosal cortex | 4.2746E-01 | 2.3123E-02 | Not significant |
| 1455 | GCST90004638 | rfMRI amplitudes (ICA100 node 50) | 4.2844E-01 | 2.3139E-02 | Not significant |
| 1456 | GCST90002671 | HippSubfield lh volume subiculum-head | 4.2875E-01 | 2.3155E-02 | Not significant |
| 1457 | GCST90003404 | aparc-a2009s rh area G-temp-sup-Lateral | 4.2917E-01 | 2.3171E-02 | Not significant |
| 1458 | GCST90004631 | rfMRI amplitudes (ICA100 node 43) | 4.2921E-01 | 2.3187E-02 | Not significant |
| 1459 | GCST90003735 | aparc-a2009s rh thickness S-occipital-ant | 4.3019E-01 | 2.3203E-02 | Not significant |
| 1460 | GCST90003865 | IDP SWI T2star left caudate | 4.3048E-01 | 2.3219E-02 | Not significant |
| 1461 | GCST90004098 | IDP dMRI TBSS L1 Anterior corona radiata L | 4.3052E-01 | 2.3235E-02 | Not significant |
| 1462 | GCST90004344 | IDP dMRI TBSS ICVF Anterior limb of internal capsule L | 4.3176E-01 | 2.3251E-02 | Not significant |
| 1463 | GCST90003147 | aparc-pial lh area fusiform | 4.3201E-01 | 2.3267E-02 | Not significant |
| 1464 | GCST90003723 | aparc-a2009s rh thickness S-circular-insula-ant | 4.3203E-01 | 2.3282E-02 | Not significant |
| 1465 | GCST90003398 | aparc-a2009s rh area G-postcentral | 4.3303E-01 | 2.3298E-02 | Not significant |
| 1466 | GCST90004632 | rfMRI amplitudes (ICA100 node 44) | 4.3504E-01 | 2.3314E-02 | Not significant |
| 1467 | GCST90004447 | IDP dMRI TBSS OD Uncinate fasciculus L | 4.3521E-01 | 2.3330E-02 | Not significant |
| 1468 | GCST90003913 | IDP dMRI TBSS FA Cingulum hippocampus R | 4.3537E-01 | 2.3346E-02 | Not significant |
| 1469 | GCST90002792 | aparc-Desikan lh volume precuneus | 4.3554E-01 | 2.3362E-02 | Not significant |
| 1470 | GCST90003343 | aparc-a2009s lh area S-circular-insula-ant | 4.3592E-01 | 2.3378E-02 | Not significant |
| 1471 | GCST90003037 | aparc-a2009s rh volume Lat-Fis-ant-Horizont | 4.3635E-01 | 2.3394E-02 | Not significant |
| 1472 | GCST90003104 | aparc-Desikan lh area frontalpole | 4.3693E-01 | 2.3410E-02 | Not significant |
| 1473 | GCST90003356 | aparc-a2009s lh area S-oc-temp-lat | 4.3700E-01 | 2.3426E-02 | Not significant |
| 1474 | GCST90004235 | IDP dMRI ProbtrackX MD mcp | 4.3702E-01 | 2.3441E-02 | Not significant |
| 1475 | GCST90002955 | aparc-a2009s lh volume G-rectus | 4.3752E-01 | 2.3457E-02 | Not significant |
| 1476 | GCST90002881 | aparc-DKTatlas lh volume pericalcarine | 4.3790E-01 | 2.3473E-02 | Not significant |
| 1477 | GCST90003645 | aparc-a2009s lh thickness Pole-temporal | 4.3825E-01 | 2.3489E-02 | Not significant |
| 1478 | GCST90003411 | aparc-a2009s rh area Lat-Fis-post | 4.3918E-01 | 2.3505E-02 | Not significant |
| 1479 | GCST90003316 | aparc-a2009s lh area G-occipital-sup | 4.3970E-01 | 2.3521E-02 | Not significant |
| 1480 | GCST90004169 | IDP dMRI TBSS L2 Tapetum R | 4.4039E-01 | 2.3537E-02 | Not significant |
| 1481 | GCST90003333 | aparc-a2009s lh area G-temporal-inf | 4.4069E-01 | 2.3553E-02 | Not significant |
| 1482 | GCST90002746 | ThalamNuclei rh volume Pf | 4.4142E-01 | 2.3569E-02 | Not significant |
| 1483 | GCST90004405 | IDP dMRI TBSS OD Body of corpus callosum | 4.4201E-01 | 2.3585E-02 | Not significant |
| 1484 | GCST90006358 | QC rfMRI cleaned inverse tSNR | 4.4245E-01 | 2.3601E-02 | Not significant |
| 1485 | GCST90003562 | aparc-DKTatlas lh thickness precentral | 4.4292E-01 | 2.3616E-02 | Not significant |
| 1486 | GCST90002864 | aparc-DKTatlas lh volume caudalmiddlefrontal | 4.4320E-01 | 2.3632E-02 | Not significant |
| 1487 | GCST90004433 | IDP dMRI TBSS OD Sagittal stratum L | 4.4384E-01 | 2.3648E-02 | Not significant |
| 1488 | GCST90002613 | aseg global volume-ratio MaskVol-to-eTIV | 4.4405E-01 | 2.3664E-02 | Not significant |
| 1489 | GCST90003045 | aparc-a2009s rh volume S-circular-insula-ant | 4.4413E-01 | 2.3680E-02 | Not significant |
| 1490 | GCST90004328 | IDP dMRI TBSS ICVF Pontine crossing tract | 4.4444E-01 | 2.3696E-02 | Not significant |
| 1491 | GCST90003551 | aparc-DKTatlas lh thickness lingual | 4.4467E-01 | 2.3712E-02 | Not significant |
| 1492 | GCST90002797 | aparc-Desikan lh volume superiortemporal | 4.4518E-01 | 2.3728E-02 | Not significant |
| 1493 | GCST90004589 | rfMRI amplitudes (ICA100 node 1) | 4.4565E-01 | 2.3744E-02 | Not significant |
| 1494 | GCST90003157 | aparc-pial lh area paracentral | 4.4578E-01 | 2.3760E-02 | Not significant |
| 1495 | GCST90003346 | aparc-a2009s lh area S-collat-transv-ant | 4.4603E-01 | 2.3775E-02 | Not significant |
| 1496 | GCST90004544 | IDP dMRI ProbtrackX ISOVF ptr l | 4.4617E-01 | 2.3791E-02 | Not significant |
| 1497 | GCST90004443 | IDP dMRI TBSS OD Superior longitudinal fasciculus L | 4.4682E-01 | 2.3807E-02 | Not significant |
| 1498 | GCST90006347 | QC T1-to-standard nonlinear alignment warping | 4.4710E-01 | 2.3823E-02 | Not significant |
| 1499 | GCST90004218 | IDP dMRI TBSS L3 Tapetum L | 4.4713E-01 | 2.3839E-02 | Not significant |
| 1500 | GCST90004392 | IDP dMRI ProbtrackX ICVF ml l | 4.4751E-01 | 2.3855E-02 | Not significant |
| 1501 | GCST90004538 | IDP dMRI ProbtrackX ISOVF ifo r | 4.4777E-01 | 2.3871E-02 | Not significant |
| 1502 | GCST90002668 | HippSubfield lh volume Hippocampal-tail | 4.4797E-01 | 2.3887E-02 | Not significant |
| 1503 | GCST90002773 | aparc-Desikan lh volume entorhinal | 4.4905E-01 | 2.3903E-02 | Not significant |
| 1504 | GCST90004079 | IDP dMRI TBSS L1 Splenium of corpus callosum | 4.4915E-01 | 2.3919E-02 | Not significant |
| 1505 | GCST90003653 | aparc-a2009s lh thickness S-collat-transv-post | 4.4963E-01 | 2.3934E-02 | Not significant |
| 1506 | GCST90003877 | IDP dMRI TBSS FA Middle cerebellar peduncle | 4.4997E-01 | 2.3950E-02 | Not significant |
| 1507 | GCST90003583 | aparc-DKTatlas rh thickness medialorbitofrontal | 4.5001E-01 | 2.3966E-02 | Not significant |
| 1508 | GCST90003782 | aseg rh intensity Thalamus-Proper | 4.5013E-01 | 2.3982E-02 | Not significant |
| 1509 | GCST90002759 | ThalamNuclei rh volume LP | 4.5067E-01 | 2.3998E-02 | Not significant |
| 1510 | GCST90004283 | IDP dMRI ProbtrackX L2 fma | 4.5146E-01 | 2.4014E-02 | Not significant |
| 1511 | GCST90003764 | aseg lh intensity Lateral-Ventricle | 4.5151E-01 | 2.4030E-02 | Not significant |
| 1512 | GCST90002558 | IDP T1 FAST ROIs R amygdala | 4.5167E-01 | 2.4046E-02 | Not significant |
| 1513 | GCST90002695 | HippSubfield rh volume presubiculum-head | 4.5181E-01 | 2.4062E-02 | Not significant |
| 1514 | GCST90002432 | IDP T1 SIENAX white normalised volume | 4.5207E-01 | 2.4078E-02 | Not significant |
| 1515 | GCST90004505 | IDP dMRI TBSS ISOVF Posterior thalamic radiation R | 4.5210E-01 | 2.4094E-02 | Not significant |
| 1516 | GCST90004191 | IDP dMRI TBSS L3 Retrolenticular part of internal capsule R | 4.5229E-01 | 2.4109E-02 | Not significant |
| 1517 | GCST90004572 | rfMRI amplitudes (ICA25 node 5) | 4.5275E-01 | 2.4125E-02 | Not significant |
| 1518 | GCST90002816 | aparc-Desikan rh volume parahippocampal | 4.5403E-01 | 2.4141E-02 | Not significant |
| 1519 | GCST90002703 | HippSubfield rh volume GC-ML-DG-body | 4.5404E-01 | 2.4157E-02 | Not significant |
| 1520 | GCST90003585 | aparc-DKTatlas rh thickness parahippocampal | 4.5454E-01 | 2.4173E-02 | Not significant |
| 1521 | GCST90002740 | ThalamNuclei rh volume L-Sg | 4.5505E-01 | 2.4189E-02 | Not significant |
| 1522 | GCST90004459 | IDP dMRI ProbtrackX OD cst r | 4.5516E-01 | 2.4205E-02 | Not significant |
| 1523 | GCST90003176 | aparc-pial rh area caudalanteriorcingulate | 4.5578E-01 | 2.4221E-02 | Not significant |
| 1524 | GCST90004304 | IDP dMRI ProbtrackX L3 cgc l | 4.5666E-01 | 2.4237E-02 | Not significant |
| 1525 | GCST90003964 | IDP dMRI TBSS MO Superior cerebellar peduncle R | 4.5666E-01 | 2.4253E-02 | Not significant |
| 1526 | GCST90003309 | aparc-a2009s lh area G-front-inf-Orbital | 4.5667E-01 | 2.4268E-02 | Not significant |
| 1527 | GCST90002998 | aparc-a2009s lh volume S-temporal-transverse | 4.5675E-01 | 2.4284E-02 | Not significant |
| 1528 | GCST90002893 | aparc-DKTatlas lh volume insula | 4.5712E-01 | 2.4300E-02 | Not significant |
| 1529 | GCST90002628 | aseg lh volume vessel | 4.5786E-01 | 2.4316E-02 | Not significant |
| 1530 | GCST90003767 | aseg lh intensity Cerebellum-Cortex | 4.5801E-01 | 2.4332E-02 | Not significant |
| 1531 | GCST90003623 | aparc-a2009s lh thickness G-oc-temp-lat-fusifor | 4.5823E-01 | 2.4348E-02 | Not significant |
| 1532 | GCST90002453 | IDP T1 FAST ROIs L insular cortex | 4.5831E-01 | 2.4364E-02 | Not significant |
| 1533 | GCST90004619 | rfMRI amplitudes (ICA100 node 31) | 4.5846E-01 | 2.4380E-02 | Not significant |
| 1534 | GCST90004021 | IDP dMRI ProbtrackX MO slf l | 4.5862E-01 | 2.4396E-02 | Not significant |
| 1535 | GCST90002980 | aparc-a2009s lh volume S-intrapariet+P-trans | 4.5918E-01 | 2.4412E-02 | Not significant |
| 1536 | GCST90002614 | aseg lh volume Cortex | 4.5952E-01 | 2.4427E-02 | Not significant |
| 1537 | GCST90003580 | aparc-DKTatlas rh thickness lateraloccipital | 4.5952E-01 | 2.4443E-02 | Not significant |
| 1538 | GCST90003043 | aparc-a2009s rh volume S-central | 4.6060E-01 | 2.4459E-02 | Not significant |
| 1539 | GCST90004161 | IDP dMRI TBSS L2 Fornix cres+Stria terminalis R | 4.6094E-01 | 2.4475E-02 | Not significant |
| 1540 | GCST90004076 | IDP dMRI TBSS L1 Pontine crossing tract | 4.6257E-01 | 2.4491E-02 | Not significant |
| 1541 | GCST90003773 | aseg lh intensity Amygdala | 4.6286E-01 | 2.4507E-02 | Not significant |
| 1542 | GCST90003318 | aparc-a2009s lh area G-oc-temp-med-Lingual | 4.6331E-01 | 2.4523E-02 | Not significant |
| 1543 | GCST90003196 | aparc-pial rh area posteriorcingulate | 4.6409E-01 | 2.4539E-02 | Not significant |
| 1544 | GCST90003963 | IDP dMRI TBSS MO Inferior cerebellar peduncle L | 4.6455E-01 | 2.4555E-02 | Not significant |
| 1545 | GCST90003823 | wg lh intensity-contrast frontalpole | 4.6471E-01 | 2.4571E-02 | Not significant |
| 1546 | GCST90004499 | IDP dMRI TBSS ISOVF Anterior corona radiata R | 4.6575E-01 | 2.4587E-02 | Not significant |
| 1547 | GCST90003206 | aparc-pial rh area transversetemporal | 4.6633E-01 | 2.4602E-02 | Not significant |
| 1548 | GCST90003713 | aparc-a2009s rh thickness G-temporal-inf | 4.6756E-01 | 2.4618E-02 | Not significant |
| 1549 | GCST90002618 | aseg lh volume Cerebellum-White-Matter | 4.6902E-01 | 2.4634E-02 | Not significant |
| 1550 | GCST90003100 | aparc-Desikan lh area superiorfrontal | 4.6905E-01 | 2.4650E-02 | Not significant |
| 1551 | GCST90002815 | aparc-Desikan rh volume middletemporal | 4.6920E-01 | 2.4666E-02 | Not significant |
| 1552 | GCST90003223 | BA-exvivo rh area BA3a | 4.6932E-01 | 2.4682E-02 | Not significant |
| 1553 | GCST90002857 | BA-exvivo rh volume BA45 | 4.6938E-01 | 2.4698E-02 | Not significant |
| 1554 | GCST90002727 | ThalamNuclei lh volume MV(Re) | 4.6954E-01 | 2.4714E-02 | Not significant |
| 1555 | GCST90003041 | aparc-a2009s rh volume Pole-temporal | 4.6981E-01 | 2.4730E-02 | Not significant |
| 1556 | GCST90003933 | IDP dMRI ProbtrackX FA cst l | 4.6991E-01 | 2.4746E-02 | Not significant |
| 1557 | GCST90004574 | rfMRI amplitudes (ICA25 node 7) | 4.7086E-01 | 2.4761E-02 | Not significant |
| 1558 | GCST90003561 | aparc-DKTatlas lh thickness posteriorcingulate | 4.7093E-01 | 2.4777E-02 | Not significant |
| 1559 | GCST90004550 | IDP dMRI ProbtrackX ISOVF unc l | 4.7139E-01 | 2.4793E-02 | Not significant |
| 1560 | GCST90002763 | ThalamNuclei rh volume Whole-thalamus | 4.7176E-01 | 2.4809E-02 | Not significant |
| 1561 | GCST90002757 | ThalamNuclei rh volume Pt | 4.7234E-01 | 2.4825E-02 | Not significant |
| 1562 | GCST90004353 | IDP dMRI TBSS ICVF Posterior corona radiata R | 4.7239E-01 | 2.4841E-02 | Not significant |
| 1563 | GCST90003776 | aseg lh intensity vessel | 4.7376E-01 | 2.4857E-02 | Not significant |
| 1564 | GCST90003718 | aparc-a2009s rh thickness Pole-occipital | 4.7399E-01 | 2.4873E-02 | Not significant |
| 1565 | GCST90003283 | aparc-DKTatlas rh area parstriangularis | 4.7424E-01 | 2.4889E-02 | Not significant |
| 1566 | GCST90003676 | aparc-a2009s lh thickness S-temporal-transverse | 4.7427E-01 | 2.4905E-02 | Not significant |
| 1567 | GCST90002780 | aparc-Desikan lh volume lingual | 4.7474E-01 | 2.4920E-02 | Not significant |
| 1568 | GCST90004514 | IDP dMRI TBSS ISOVF Cingulum hippocampus L | 4.7513E-01 | 2.4936E-02 | Not significant |
| 1569 | GCST90002825 | aparc-Desikan rh volume precuneus | 4.7540E-01 | 2.4952E-02 | Not significant |
| 1570 | GCST90002951 | aparc-a2009s lh volume G-parietal-sup | 4.7598E-01 | 2.4968E-02 | Not significant |
| 1571 | GCST90002847 | BA-exvivo lh volume perirhinal | 4.7707E-01 | 2.4984E-02 | Not significant |
| 1572 | GCST90004032 | IDP dMRI TBSS MD Fornix | 4.7733E-01 | 2.5000E-02 | Not significant |
| 1573 | GCST90003706 | aparc-a2009s rh thickness G-precuneus | 4.7858E-01 | 2.5016E-02 | Not significant |
| 1574 | GCST90004257 | IDP dMRI ProbtrackX L1 fmi | 4.7864E-01 | 2.5032E-02 | Not significant |
| 1575 | GCST90003680 | aparc-a2009s rh thickness G+S-subcentral | 4.7911E-01 | 2.5048E-02 | Not significant |
| 1576 | GCST90003007 | aparc-a2009s rh volume G-cingul-Post-dorsal | 4.7962E-01 | 2.5064E-02 | Not significant |
| 1577 | GCST90004583 | rfMRI amplitudes (ICA25 node 16) | 4.7992E-01 | 2.5080E-02 | Not significant |
| 1578 | GCST90004319 | IDP dMRI ProbtrackX L3 ptr l | 4.8037E-01 | 2.5095E-02 | Not significant |
| 1579 | GCST90002713 | ThalamNuclei lh volume LGN | 4.8054E-01 | 2.5111E-02 | Not significant |
| 1580 | GCST90002863 | aparc-DKTatlas lh volume caudalanteriorcingulate | 4.8065E-01 | 2.5127E-02 | Not significant |
| 1581 | GCST90004084 | IDP dMRI TBSS L1 Medial lemniscus L | 4.8080E-01 | 2.5143E-02 | Not significant |
| 1582 | GCST90003615 | aparc-a2009s lh thickness G-front-inf-Orbital | 4.8112E-01 | 2.5159E-02 | Not significant |
| 1583 | GCST90002440 | IDP T1 FIRST left putamen volume | 4.8120E-01 | 2.5175E-02 | Not significant |
| 1584 | GCST90004320 | IDP dMRI ProbtrackX L3 ptr r | 4.8153E-01 | 2.5191E-02 | Not significant |
| 1585 | GCST90004245 | IDP dMRI ProbtrackX MD unc r | 4.8165E-01 | 2.5207E-02 | Not significant |
| 1586 | GCST90004122 | IDP dMRI TBSS L1 Tapetum L | 4.8172E-01 | 2.5223E-02 | Not significant |
| 1587 | GCST90003928 | IDP dMRI ProbtrackX FA atr r | 4.8301E-01 | 2.5239E-02 | Not significant |
| 1588 | GCST90003622 | aparc-a2009s lh thickness G-occipital-sup | 4.8302E-01 | 2.5254E-02 | Not significant |
| 1589 | GCST90004633 | rfMRI amplitudes (ICA100 node 45) | 4.8322E-01 | 2.5270E-02 | Not significant |
| 1590 | GCST90003334 | aparc-a2009s lh area G-temporal-middle | 4.8343E-01 | 2.5286E-02 | Not significant |
| 1591 | GCST90002923 | aparc-DKTatlas rh volume transversetemporal | 4.8365E-01 | 2.5302E-02 | Not significant |
| 1592 | GCST90004313 | IDP dMRI ProbtrackX L3 ifo r | 4.8385E-01 | 2.5318E-02 | Not significant |
| 1593 | GCST90003219 | BA-exvivo lh area perirhinal | 4.8431E-01 | 2.5334E-02 | Not significant |
| 1594 | GCST90003112 | aparc-Desikan rh area entorhinal | 4.8469E-01 | 2.5350E-02 | Not significant |
| 1595 | GCST90004524 | IDP dMRI TBSS ISOVF Tapetum L | 4.8516E-01 | 2.5366E-02 | Not significant |
| 1596 | GCST90004252 | IDP dMRI ProbtrackX L1 cgh l | 4.8547E-01 | 2.5382E-02 | Not significant |
| 1597 | GCST90003246 | aparc-DKTatlas lh area medialorbitofrontal | 4.8594E-01 | 2.5398E-02 | Not significant |
| 1598 | GCST90002570 | IDP T1 FAST ROIs V cerebellum crus I | 4.8630E-01 | 2.5413E-02 | Not significant |
| 1599 | GCST90003099 | aparc-Desikan lh area rostralmiddlefrontal | 4.8635E-01 | 2.5429E-02 | Not significant |
| 1600 | GCST90003167 | aparc-pial lh area rostralmiddlefrontal | 4.8647E-01 | 2.5445E-02 | Not significant |
| 1601 | GCST90002626 | aseg lh volume Accumbens-area | 4.8665E-01 | 2.5461E-02 | Not significant |
| 1602 | GCST90004206 | IDP dMRI TBSS L3 Cingulum cingulate gyrus L | 4.8678E-01 | 2.5477E-02 | Not significant |
| 1603 | GCST90003760 | aseg global intensity CC-Mid-Posterior | 4.8689E-01 | 2.5493E-02 | Not significant |
| 1604 | GCST90004062 | IDP dMRI TBSS MD Cingulum cingulate gyrus L | 4.8774E-01 | 2.5509E-02 | Not significant |
| 1605 | GCST90004626 | rfMRI amplitudes (ICA100 node 38) | 4.8781E-01 | 2.5525E-02 | Not significant |
| 1606 | GCST90002750 | ThalamNuclei rh volume MV(Re) | 4.8852E-01 | 2.5541E-02 | Not significant |
| 1607 | GCST90002968 | aparc-a2009s lh volume S-calcarine | 4.8865E-01 | 2.5557E-02 | Not significant |
| 1608 | GCST90002472 | IDP T1 FAST ROIs R mid temp gyrus ant | 4.8896E-01 | 2.5573E-02 | Not significant |
| 1609 | GCST90004075 | IDP dMRI TBSS L1 Middle cerebellar peduncle | 4.8922E-01 | 2.5588E-02 | Not significant |
| 1610 | GCST90003646 | aparc-a2009s lh thickness S-calcarine | 4.8933E-01 | 2.5604E-02 | Not significant |
| 1611 | GCST90004338 | IDP dMRI TBSS ICVF Inferior cerebellar peduncle L | 4.8940E-01 | 2.5620E-02 | Not significant |
| 1612 | GCST90003183 | aparc-pial rh area isthmuscingulate | 4.8954E-01 | 2.5636E-02 | Not significant |
| 1613 | GCST90003881 | IDP dMRI TBSS FA Splenium of corpus callosum | 4.9011E-01 | 2.5652E-02 | Not significant |
| 1614 | GCST90002634 | aseg rh volume Inf-Lat-Vent | 4.9028E-01 | 2.5668E-02 | Not significant |
| 1615 | GCST90003894 | IDP dMRI TBSS FA Anterior limb of internal capsule L | 4.9095E-01 | 2.5684E-02 | Not significant |
| 1616 | GCST90002476 | IDP T1 FAST ROIs R mid temp gyrus tempocc | 4.9156E-01 | 2.5700E-02 | Not significant |
| 1617 | GCST90003141 | aparc-pial lh area TotalSurface | 4.9211E-01 | 2.5716E-02 | Not significant |
| 1618 | GCST90003265 | aparc-DKTatlas lh area insula | 4.9258E-01 | 2.5732E-02 | Not significant |
| 1619 | GCST90002697 | HippSubfield rh volume presubiculum-body | 4.9272E-01 | 2.5747E-02 | Not significant |
| 1620 | GCST90003467 | aparc-Desikan lh thickness posteriorcingulate | 4.9280E-01 | 2.5763E-02 | Not significant |
| 1621 | GCST90004586 | rfMRI amplitudes (ICA25 node 19) | 4.9346E-01 | 2.5779E-02 | Not significant |
| 1622 | GCST90004503 | IDP dMRI TBSS ISOVF Posterior corona radiata R | 4.9346E-01 | 2.5795E-02 | Not significant |
| 1623 | GCST90004617 | rfMRI amplitudes (ICA100 node 29) | 4.9347E-01 | 2.5811E-02 | Not significant |
| 1624 | GCST90003640 | aparc-a2009s lh thickness G-temporal-middle | 4.9369E-01 | 2.5827E-02 | Not significant |
| 1625 | GCST90004374 | IDP dMRI TBSS ICVF Tapetum L | 4.9453E-01 | 2.5843E-02 | Not significant |
| 1626 | GCST90002895 | aparc-DKTatlas rh volume caudalmiddlefrontal | 4.9471E-01 | 2.5859E-02 | Not significant |
| 1627 | GCST90004467 | IDP dMRI ProbtrackX OD ml l | 4.9544E-01 | 2.5875E-02 | Not significant |
| 1628 | GCST90003301 | aparc-a2009s lh area G+S-transv-frontopol | 4.9611E-01 | 2.5891E-02 | Not significant |
| 1629 | GCST90005189 | rfMRI connectivity (ICA100 edge 336) | 4.9617E-01 | 2.5906E-02 | Not significant |
| 1630 | GCST90003091 | aparc-Desikan lh area parsorbitalis | 4.9624E-01 | 2.5922E-02 | Not significant |
| 1631 | GCST90002960 | aparc-a2009s lh volume G-temp-sup-Plan-tempo | 4.9663E-01 | 2.5938E-02 | Not significant |
| 1632 | GCST90004176 | IDP dMRI TBSS L3 Fornix | 4.9768E-01 | 2.5954E-02 | Not significant |
| 1633 | GCST90005661 | rfMRI connectivity (ICA100 edge 808) | 4.9807E-01 | 2.5970E-02 | Not significant |
| 1634 | GCST90003415 | aparc-a2009s rh area S-central | 4.9850E-01 | 2.5986E-02 | Not significant |
| 1635 | GCST90003635 | aparc-a2009s lh thickness G-temp-sup-G-T-transv | 4.9861E-01 | 2.6002E-02 | Not significant |
| 1636 | GCST90003405 | aparc-a2009s rh area G-temp-sup-Plan-polar | 4.9889E-01 | 2.6018E-02 | Not significant |
| 1637 | GCST90003702 | aparc-a2009s rh thickness G-pariet-inf-Supramar | 4.9911E-01 | 2.6034E-02 | Not significant |
| 1638 | GCST90004470 | IDP dMRI ProbtrackX OD ptr r | 4.9927E-01 | 2.6050E-02 | Not significant |
| 1639 | GCST90005791 | rfMRI connectivity (ICA100 edge 938) | 4.9979E-01 | 2.6066E-02 | Not significant |
| 1640 | GCST90005972 | rfMRI connectivity (ICA100 edge 1119) | 5.0091E-01 | 2.6081E-02 | Not significant |
| 1641 | GCST90005193 | rfMRI connectivity (ICA100 edge 340) | 5.0095E-01 | 2.6097E-02 | Not significant |
| 1642 | GCST90004141 | IDP dMRI TBSS L2 Posterior limb of internal capsule R | 5.0112E-01 | 2.6113E-02 | Not significant |
| 1643 | GCST90006198 | rfMRI connectivity (ICA100 edge 1345) | 5.0120E-01 | 2.6129E-02 | Not significant |
| 1644 | GCST90005862 | rfMRI connectivity (ICA100 edge 1009) | 5.0128E-01 | 2.6145E-02 | Not significant |
| 1645 | GCST90004723 | rfMRI connectivity (ICA25 edge 80) | 5.0214E-01 | 2.6161E-02 | Not significant |
| 1646 | GCST90004696 | rfMRI connectivity (ICA25 edge 53) | 5.0263E-01 | 2.6177E-02 | Not significant |
| 1647 | GCST90003801 | wg lh intensity-contrast isthmuscingulate | 5.0314E-01 | 2.6193E-02 | Not significant |
| 1648 | GCST90005809 | rfMRI connectivity (ICA100 edge 956) | 5.0320E-01 | 2.6209E-02 | Not significant |
| 1649 | GCST90003821 | wg lh intensity-contrast superiortemporal | 5.0341E-01 | 2.6225E-02 | Not significant |
| 1650 | GCST90004417 | IDP dMRI TBSS OD Cerebral peduncle L | 5.0373E-01 | 2.6240E-02 | Not significant |
| 1651 | GCST90005812 | rfMRI connectivity (ICA100 edge 959) | 5.0402E-01 | 2.6256E-02 | Not significant |
| 1652 | GCST90005733 | rfMRI connectivity (ICA100 edge 880) | 5.0410E-01 | 2.6272E-02 | Not significant |
| 1653 | GCST90005774 | rfMRI connectivity (ICA100 edge 921) | 5.0426E-01 | 2.6288E-02 | Not significant |
| 1654 | GCST90006135 | rfMRI connectivity (ICA100 edge 1282) | 5.0428E-01 | 2.6304E-02 | Not significant |
| 1655 | GCST90003707 | aparc-a2009s rh thickness G-rectus | 5.0434E-01 | 2.6320E-02 | Not significant |
| 1656 | GCST90005317 | rfMRI connectivity (ICA100 edge 464) | 5.0434E-01 | 2.6336E-02 | Not significant |
| 1657 | GCST90004529 | IDP dMRI ProbtrackX ISOVF cgc l | 5.0451E-01 | 2.6352E-02 | Not significant |
| 1658 | GCST90003400 | aparc-a2009s rh area G-precuneus | 5.0453E-01 | 2.6368E-02 | Not significant |
| 1659 | GCST90002646 | aseg rh volume choroid-plexus | 5.0483E-01 | 2.6384E-02 | Not significant |
| 1660 | GCST90006293 | rfMRI connectivity (ICA100 edge 1440) | 5.0529E-01 | 2.6399E-02 | Not significant |
| 1661 | GCST90004099 | IDP dMRI TBSS L1 Superior corona radiata R | 5.0532E-01 | 2.6415E-02 | Not significant |
| 1662 | GCST90005160 | rfMRI connectivity (ICA100 edge 307) | 5.0577E-01 | 2.6431E-02 | Not significant |
| 1663 | GCST90004902 | rfMRI connectivity (ICA100 edge 49) | 5.0583E-01 | 2.6447E-02 | Not significant |
| 1664 | GCST90004160 | IDP dMRI TBSS L2 Cingulum hippocampus L | 5.0602E-01 | 2.6463E-02 | Not significant |
| 1665 | GCST90003213 | BA-exvivo lh area BA6 | 5.0612E-01 | 2.6479E-02 | Not significant |
| 1666 | GCST90006114 | rfMRI connectivity (ICA100 edge 1261) | 5.0619E-01 | 2.6495E-02 | Not significant |
| 1667 | GCST90003728 | aparc-a2009s rh thickness S-front-inf | 5.0653E-01 | 2.6511E-02 | Not significant |
| 1668 | GCST90005525 | rfMRI connectivity (ICA100 edge 672) | 5.0673E-01 | 2.6527E-02 | Not significant |
| 1669 | GCST90005366 | rfMRI connectivity (ICA100 edge 513) | 5.0676E-01 | 2.6543E-02 | Not significant |
| 1670 | GCST90005044 | rfMRI connectivity (ICA100 edge 191) | 5.0685E-01 | 2.6559E-02 | Not significant |
| 1671 | GCST90004466 | IDP dMRI ProbtrackX OD mcp | 5.0685E-01 | 2.6574E-02 | Not significant |
| 1672 | GCST90005424 | rfMRI connectivity (ICA100 edge 571) | 5.0734E-01 | 2.6590E-02 | Not significant |
| 1673 | GCST90004102 | IDP dMRI TBSS L1 Posterior corona radiata L | 5.0734E-01 | 2.6606E-02 | Not significant |
| 1674 | GCST90005451 | rfMRI connectivity (ICA100 edge 598) | 5.0758E-01 | 2.6622E-02 | Not significant |
| 1675 | GCST90003175 | aparc-pial rh area bankssts | 5.0796E-01 | 2.6638E-02 | Not significant |
| 1676 | GCST90003519 | BA-exvivo lh thickness BA6 | 5.0876E-01 | 2.6654E-02 | Not significant |
| 1677 | GCST90003002 | aparc-a2009s rh volume G+S-subcentral | 5.0917E-01 | 2.6670E-02 | Not significant |
| 1678 | GCST90005928 | rfMRI connectivity (ICA100 edge 1075) | 5.0919E-01 | 2.6686E-02 | Not significant |
| 1679 | GCST90006214 | rfMRI connectivity (ICA100 edge 1361) | 5.0927E-01 | 2.6702E-02 | Not significant |
| 1680 | GCST90003556 | aparc-DKTatlas lh thickness parsopercularis | 5.0940E-01 | 2.6718E-02 | Not significant |
| 1681 | GCST90004705 | rfMRI connectivity (ICA25 edge 62) | 5.0959E-01 | 2.6733E-02 | Not significant |
| 1682 | GCST90005760 | rfMRI connectivity (ICA100 edge 907) | 5.0988E-01 | 2.6749E-02 | Not significant |
| 1683 | GCST90004804 | rfMRI connectivity (ICA25 edge 161) | 5.0998E-01 | 2.6765E-02 | Not significant |
| 1684 | GCST90005206 | rfMRI connectivity (ICA100 edge 353) | 5.1047E-01 | 2.6781E-02 | Not significant |
| 1685 | GCST90004513 | IDP dMRI TBSS ISOVF Cingulum hippocampus R | 5.1078E-01 | 2.6797E-02 | Not significant |
| 1686 | GCST90005543 | rfMRI connectivity (ICA100 edge 690) | 5.1083E-01 | 2.6813E-02 | Not significant |
| 1687 | GCST90003378 | aparc-a2009s rh area G+S-cingul-Mid-Post | 5.1164E-01 | 2.6829E-02 | Not significant |
| 1688 | GCST90003537 | BA-exvivo rh thickness V2 | 5.1180E-01 | 2.6845E-02 | Not significant |
| 1689 | GCST90005066 | rfMRI connectivity (ICA100 edge 213) | 5.1230E-01 | 2.6861E-02 | Not significant |
| 1690 | GCST90003047 | aparc-a2009s rh volume S-circular-insula-sup | 5.1276E-01 | 2.6877E-02 | Not significant |
| 1691 | GCST90006048 | rfMRI connectivity (ICA100 edge 1195) | 5.1289E-01 | 2.6892E-02 | Not significant |
| 1692 | GCST90003383 | aparc-a2009s rh area G-front-inf-Orbital | 5.1301E-01 | 2.6908E-02 | Not significant |
| 1693 | GCST90003342 | aparc-a2009s lh area S-cingul-Marginalis | 5.1302E-01 | 2.6924E-02 | Not significant |
| 1694 | GCST90006037 | rfMRI connectivity (ICA100 edge 1184) | 5.1376E-01 | 2.6940E-02 | Not significant |
| 1695 | GCST90006027 | rfMRI connectivity (ICA100 edge 1174) | 5.1398E-01 | 2.6956E-02 | Not significant |
| 1696 | GCST90004145 | IDP dMRI TBSS L2 Anterior corona radiata R | 5.1400E-01 | 2.6972E-02 | Not significant |
| 1697 | GCST90004919 | rfMRI connectivity (ICA100 edge 66) | 5.1446E-01 | 2.6988E-02 | Not significant |
| 1698 | GCST90005363 | rfMRI connectivity (ICA100 edge 510) | 5.1486E-01 | 2.7004E-02 | Not significant |
| 1699 | GCST90004418 | IDP dMRI TBSS OD Anterior limb of internal capsule R | 5.1489E-01 | 2.7020E-02 | Not significant |
| 1700 | GCST90005646 | rfMRI connectivity (ICA100 edge 793) | 5.1522E-01 | 2.7036E-02 | Not significant |
| 1701 | GCST90003494 | aparc-Desikan rh thickness parahippocampal | 5.1542E-01 | 2.7052E-02 | Not significant |
| 1702 | GCST90005012 | rfMRI connectivity (ICA100 edge 159) | 5.1544E-01 | 2.7067E-02 | Not significant |
| 1703 | GCST90002730 | ThalamNuclei lh volume PuL | 5.1585E-01 | 2.7083E-02 | Not significant |
| 1704 | GCST90006087 | rfMRI connectivity (ICA100 edge 1234) | 5.1611E-01 | 2.7099E-02 | Not significant |
| 1705 | GCST90003182 | aparc-pial rh area inferiortemporal | 5.1662E-01 | 2.7115E-02 | Not significant |
| 1706 | GCST90003399 | aparc-a2009s rh area G-precentral | 5.1678E-01 | 2.7131E-02 | Not significant |
| 1707 | GCST90005578 | rfMRI connectivity (ICA100 edge 725) | 5.1702E-01 | 2.7147E-02 | Not significant |
| 1708 | GCST90004188 | IDP dMRI TBSS L3 Anterior limb of internal capsule L | 5.1722E-01 | 2.7163E-02 | Not significant |
| 1709 | GCST90002711 | HippSubfield rh volume Whole-hippocampus | 5.1759E-01 | 2.7179E-02 | Not significant |
| 1710 | GCST90002777 | aparc-Desikan lh volume isthmuscingulate | 5.1796E-01 | 2.7195E-02 | Not significant |
| 1711 | GCST90005390 | rfMRI connectivity (ICA100 edge 537) | 5.1803E-01 | 2.7211E-02 | Not significant |
| 1712 | GCST90005386 | rfMRI connectivity (ICA100 edge 533) | 5.1803E-01 | 2.7226E-02 | Not significant |
| 1713 | GCST90003606 | aparc-a2009s lh thickness G+S-subcentral | 5.1815E-01 | 2.7242E-02 | Not significant |
| 1714 | GCST90002639 | aseg rh volume Putamen | 5.1818E-01 | 2.7258E-02 | Not significant |
| 1715 | GCST90004262 | IDP dMRI ProbtrackX L1 mcp | 5.1864E-01 | 2.7274E-02 | Not significant |
| 1716 | GCST90004925 | rfMRI connectivity (ICA100 edge 72) | 5.1909E-01 | 2.7290E-02 | Not significant |
| 1717 | GCST90005970 | rfMRI connectivity (ICA100 edge 1117) | 5.1925E-01 | 2.7306E-02 | Not significant |
| 1718 | GCST90003564 | aparc-DKTatlas lh thickness rostralanteriorcingulate | 5.2045E-01 | 2.7322E-02 | Not significant |
| 1719 | GCST90006017 | rfMRI connectivity (ICA100 edge 1164) | 5.2056E-01 | 2.7338E-02 | Not significant |
| 1720 | GCST90006035 | rfMRI connectivity (ICA100 edge 1182) | 5.2066E-01 | 2.7354E-02 | Not significant |
| 1721 | GCST90004473 | IDP dMRI ProbtrackX OD str l | 5.2125E-01 | 2.7370E-02 | Not significant |
| 1722 | GCST90003577 | aparc-DKTatlas rh thickness inferiorparietal | 5.2152E-01 | 2.7385E-02 | Not significant |
| 1723 | GCST90003593 | aparc-DKTatlas rh thickness precentral | 5.2181E-01 | 2.7401E-02 | Not significant |
| 1724 | GCST90005417 | rfMRI connectivity (ICA100 edge 564) | 5.2197E-01 | 2.7417E-02 | Not significant |
| 1725 | GCST90004819 | rfMRI connectivity (ICA25 edge 176) | 5.2216E-01 | 2.7433E-02 | Not significant |
| 1726 | GCST90003492 | aparc-Desikan rh thickness medialorbitofrontal | 5.2263E-01 | 2.7449E-02 | Not significant |
| 1727 | GCST90005098 | rfMRI connectivity (ICA100 edge 245) | 5.2300E-01 | 2.7465E-02 | Not significant |
| 1728 | GCST90003594 | aparc-DKTatlas rh thickness precuneus | 5.2300E-01 | 2.7481E-02 | Not significant |
| 1729 | GCST90005270 | rfMRI connectivity (ICA100 edge 417) | 5.2323E-01 | 2.7497E-02 | Not significant |
| 1730 | GCST90003244 | aparc-DKTatlas lh area lateralorbitofrontal | 5.2343E-01 | 2.7513E-02 | Not significant |
| 1731 | GCST90005198 | rfMRI connectivity (ICA100 edge 345) | 5.2349E-01 | 2.7529E-02 | Not significant |
| 1732 | GCST90005994 | rfMRI connectivity (ICA100 edge 1141) | 5.2375E-01 | 2.7545E-02 | Not significant |
| 1733 | GCST90004742 | rfMRI connectivity (ICA25 edge 99) | 5.2398E-01 | 2.7560E-02 | Not significant |
| 1734 | GCST90005202 | rfMRI connectivity (ICA100 edge 349) | 5.2417E-01 | 2.7576E-02 | Not significant |
| 1735 | GCST90005209 | rfMRI connectivity (ICA100 edge 356) | 5.2447E-01 | 2.7592E-02 | Not significant |
| 1736 | GCST90002676 | HippSubfield lh volume parasubiculum | 5.2469E-01 | 2.7608E-02 | Not significant |
| 1737 | GCST90005370 | rfMRI connectivity (ICA100 edge 517) | 5.2474E-01 | 2.7624E-02 | Not significant |
| 1738 | GCST90003159 | aparc-pial lh area parsorbitalis | 5.3718E-01 | 2.7640E-02 | Not significant |
| 1739 | GCST90005150 | rfMRI connectivity (ICA100 edge 297) | 5.3733E-01 | 2.7656E-02 | Not significant |
| 1740 | GCST90002598 | aseg global volume VentricleChoroid | 5.3750E-01 | 2.7672E-02 | Not significant |
| 1741 | GCST90004048 | IDP dMRI TBSS MD Retrolenticular part of internal capsule L | 5.3757E-01 | 2.7688E-02 | Not significant |
| 1742 | GCST90004120 | IDP dMRI TBSS L1 Uncinate fasciculus L | 5.3858E-01 | 2.7704E-02 | Not significant |
| 1743 | GCST90006289 | rfMRI connectivity (ICA100 edge 1436) | 5.3871E-01 | 2.7719E-02 | Not significant |
| 1744 | GCST90003501 | aparc-Desikan rh thickness posteriorcingulate | 5.3880E-01 | 2.7735E-02 | Not significant |
| 1745 | GCST90004051 | IDP dMRI TBSS MD Superior corona radiata R | 5.3931E-01 | 2.7751E-02 | Not significant |
| 1746 | GCST90005030 | rfMRI connectivity (ICA100 edge 177) | 5.3935E-01 | 2.7767E-02 | Not significant |
| 1747 | GCST90004911 | rfMRI connectivity (ICA100 edge 58) | 5.3961E-01 | 2.7783E-02 | Not significant |
| 1748 | GCST90005913 | rfMRI connectivity (ICA100 edge 1060) | 5.4049E-01 | 2.7799E-02 | Not significant |
| 1749 | GCST90005138 | rfMRI connectivity (ICA100 edge 285) | 5.4051E-01 | 2.7815E-02 | Not significant |
| 1750 | GCST90002911 | aparc-DKTatlas rh volume parstriangularis | 5.4089E-01 | 2.7831E-02 | Not significant |
| 1751 | GCST90003762 | aseg global intensity CC-Mid-Anterior | 5.4119E-01 | 2.7847E-02 | Not significant |
| 1752 | GCST90002495 | IDP T1 FAST ROIs L latocc cortex inf | 5.4194E-01 | 2.7863E-02 | Not significant |
| 1753 | GCST90004234 | IDP dMRI ProbtrackX MD ilf r | 5.4242E-01 | 2.7878E-02 | Not significant |
| 1754 | GCST90003433 | aparc-a2009s rh area S-orbital-med-olfact | 5.4264E-01 | 2.7894E-02 | Not significant |
| 1755 | GCST90004192 | IDP dMRI TBSS L3 Retrolenticular part of internal capsule L | 5.4277E-01 | 2.7910E-02 | Not significant |
| 1756 | GCST90005330 | rfMRI connectivity (ICA100 edge 477) | 5.4307E-01 | 2.7926E-02 | Not significant |
| 1757 | GCST90005481 | rfMRI connectivity (ICA100 edge 628) | 5.4418E-01 | 2.7942E-02 | Not significant |
| 1758 | GCST90004477 | IDP dMRI TBSS ISOVF Middle cerebellar peduncle | 5.4461E-01 | 2.7958E-02 | Not significant |
| 1759 | GCST90003423 | aparc-a2009s rh area S-front-middle | 5.4495E-01 | 2.7974E-02 | Not significant |
| 1760 | GCST90002910 | aparc-DKTatlas rh volume parsorbitalis | 5.4527E-01 | 2.7990E-02 | Not significant |
| 1761 | GCST90004898 | rfMRI connectivity (ICA100 edge 45) | 5.4536E-01 | 2.8006E-02 | Not significant |
| 1762 | GCST90004210 | IDP dMRI TBSS L3 Fornix cres+Stria terminalis L | 5.4540E-01 | 2.8022E-02 | Not significant |
| 1763 | GCST90005357 | rfMRI connectivity (ICA100 edge 504) | 5.4571E-01 | 2.8038E-02 | Not significant |
| 1764 | GCST90005991 | rfMRI connectivity (ICA100 edge 1138) | 5.4574E-01 | 2.8053E-02 | Not significant |
| 1765 | GCST90003473 | aparc-Desikan lh thickness superiorparietal | 5.4581E-01 | 2.8069E-02 | Not significant |
| 1766 | GCST90003947 | IDP dMRI ProbtrackX FA slf r | 5.4601E-01 | 2.8085E-02 | Not significant |
| 1767 | GCST90004684 | rfMRI connectivity (ICA25 edge 41) | 5.4649E-01 | 2.8101E-02 | Not significant |
| 1768 | GCST90004296 | IDP dMRI ProbtrackX L2 str l | 5.4656E-01 | 2.8117E-02 | Not significant |
| 1769 | GCST90005134 | rfMRI connectivity (ICA100 edge 281) | 5.4723E-01 | 2.8133E-02 | Not significant |
| 1770 | GCST90006319 | rfMRI connectivity (ICA100 edge 1466) | 5.4757E-01 | 2.8149E-02 | Not significant |
| 1771 | GCST90004083 | IDP dMRI TBSS L1 Medial lemniscus R | 5.4759E-01 | 2.8165E-02 | Not significant |
| 1772 | GCST90002438 | IDP T1 FIRST left caudate volume | 5.4765E-01 | 2.8181E-02 | Not significant |
| 1773 | GCST90002788 | aparc-Desikan lh volume pericalcarine | 5.4767E-01 | 2.8197E-02 | Not significant |
| 1774 | GCST90004702 | rfMRI connectivity (ICA25 edge 59) | 5.4773E-01 | 2.8212E-02 | Not significant |
| 1775 | GCST90005833 | rfMRI connectivity (ICA100 edge 980) | 5.4780E-01 | 2.8228E-02 | Not significant |
| 1776 | GCST90003867 | IDP SWI T2star left putamen | 5.4816E-01 | 2.8244E-02 | Not significant |
| 1777 | GCST90005192 | rfMRI connectivity (ICA100 edge 339) | 5.4838E-01 | 2.8260E-02 | Not significant |
| 1778 | GCST90003976 | IDP dMRI TBSS MO Superior corona radiata R | 5.4844E-01 | 2.8276E-02 | Not significant |
| 1779 | GCST90003180 | aparc-pial rh area fusiform | 5.4862E-01 | 2.8292E-02 | Not significant |
| 1780 | GCST90004134 | IDP dMRI TBSS L2 Inferior cerebellar peduncle L | 5.4886E-01 | 2.8308E-02 | Not significant |
| 1781 | GCST90004207 | IDP dMRI TBSS L3 Cingulum hippocampus R | 5.4887E-01 | 2.8324E-02 | Not significant |
| 1782 | GCST90003067 | aparc-a2009s rh volume S-precentral-sup-part | 5.4915E-01 | 2.8340E-02 | Not significant |
| 1783 | GCST90005955 | rfMRI connectivity (ICA100 edge 1102) | 5.4918E-01 | 2.8356E-02 | Not significant |
| 1784 | GCST90003953 | IDP dMRI TBSS MO Pontine crossing tract | 5.4920E-01 | 2.8372E-02 | Not significant |
| 1785 | GCST90004358 | IDP dMRI TBSS ICVF Sagittal stratum L | 5.4928E-01 | 2.8387E-02 | Not significant |
| 1786 | GCST90005873 | rfMRI connectivity (ICA100 edge 1020) | 5.4931E-01 | 2.8403E-02 | Not significant |
| 1787 | GCST90005288 | rfMRI connectivity (ICA100 edge 435) | 5.4972E-01 | 2.8419E-02 | Not significant |
| 1788 | GCST90006145 | rfMRI connectivity (ICA100 edge 1292) | 5.5003E-01 | 2.8435E-02 | Not significant |
| 1789 | GCST90002665 | AmygNuclei rh volume Corticoamygdaloid-transitio | 5.5028E-01 | 2.8451E-02 | Not significant |
| 1790 | GCST90004479 | IDP dMRI TBSS ISOVF Genu of corpus callosum | 5.5051E-01 | 2.8467E-02 | Not significant |
| 1791 | GCST90002463 | IDP T1 FAST ROIs L precentral gyrus | 5.5056E-01 | 2.8483E-02 | Not significant |
| 1792 | GCST90006313 | rfMRI connectivity (ICA100 edge 1460) | 5.5076E-01 | 2.8499E-02 | Not significant |
| 1793 | GCST90003208 | BA-exvivo lh area BA2 | 5.5081E-01 | 2.8515E-02 | Not significant |
| 1794 | GCST90005455 | rfMRI connectivity (ICA100 edge 602) | 5.5088E-01 | 2.8531E-02 | Not significant |
| 1795 | GCST90003846 | wg rh intensity-contrast parstriangularis | 5.5113E-01 | 2.8546E-02 | Not significant |
| 1796 | GCST90003201 | aparc-pial rh area superiorfrontal | 5.5117E-01 | 2.8562E-02 | Not significant |
| 1797 | GCST90002836 | BA-exvivo lh volume BA2 | 5.5132E-01 | 2.8578E-02 | Not significant |
| 1798 | GCST90004271 | IDP dMRI ProbtrackX L1 unc l | 5.5134E-01 | 2.8594E-02 | Not significant |
| 1799 | GCST90003310 | aparc-a2009s lh area G-front-inf-Triangul | 5.5150E-01 | 2.8610E-02 | Not significant |
| 1800 | GCST90002445 | IDP T1 FIRST right hippocampus volume | 5.5182E-01 | 2.8626E-02 | Not significant |
| 1801 | GCST90002625 | aseg lh volume Amygdala | 5.5276E-01 | 2.8642E-02 | Not significant |
| 1802 | GCST90002704 | HippSubfield rh volume CA4-head | 5.5286E-01 | 2.8658E-02 | Not significant |
| 1803 | GCST90003239 | aparc-DKTatlas lh area fusiform | 5.5332E-01 | 2.8674E-02 | Not significant |
| 1804 | GCST90005396 | rfMRI connectivity (ICA100 edge 543) | 5.5353E-01 | 2.8690E-02 | Not significant |
| 1805 | GCST90005423 | rfMRI connectivity (ICA100 edge 570) | 5.5370E-01 | 2.8705E-02 | Not significant |
| 1806 | GCST90004629 | rfMRI amplitudes (ICA100 node 41) | 5.5386E-01 | 2.8721E-02 | Not significant |
| 1807 | GCST90003720 | aparc-a2009s rh thickness S-calcarine | 5.5422E-01 | 2.8737E-02 | Not significant |
| 1808 | GCST90005186 | rfMRI connectivity (ICA100 edge 333) | 5.5431E-01 | 2.8753E-02 | Not significant |
| 1809 | GCST90002789 | aparc-Desikan lh volume postcentral | 5.5442E-01 | 2.8769E-02 | Not significant |
| 1810 | GCST90004229 | IDP dMRI ProbtrackX MD fma | 5.5462E-01 | 2.8785E-02 | Not significant |
| 1811 | GCST90002907 | aparc-DKTatlas rh volume parahippocampal | 5.5486E-01 | 2.8801E-02 | Not significant |
| 1812 | GCST90003672 | aparc-a2009s lh thickness S-suborbital | 5.5497E-01 | 2.8817E-02 | Not significant |
| 1813 | GCST90006216 | rfMRI connectivity (ICA100 edge 1363) | 5.5501E-01 | 2.8833E-02 | Not significant |
| 1814 | GCST90005003 | rfMRI connectivity (ICA100 edge 150) | 5.5507E-01 | 2.8849E-02 | Not significant |
| 1815 | GCST90003059 | aparc-a2009s rh volume S-oc-temp-med+Lingual | 5.5545E-01 | 2.8865E-02 | Not significant |
| 1816 | GCST90005129 | rfMRI connectivity (ICA100 edge 276) | 5.5582E-01 | 2.8880E-02 | Not significant |
| 1817 | GCST90002941 | aparc-a2009s lh volume G-Ins-lg+S-cent-ins | 5.5605E-01 | 2.8896E-02 | Not significant |
| 1818 | GCST90005183 | rfMRI connectivity (ICA100 edge 330) | 5.5614E-01 | 2.8912E-02 | Not significant |
| 1819 | GCST90002731 | ThalamNuclei lh volume Pt | 5.5615E-01 | 2.8928E-02 | Not significant |
| 1820 | GCST90005935 | rfMRI connectivity (ICA100 edge 1082) | 5.5702E-01 | 2.8944E-02 | Not significant |
| 1821 | GCST90005740 | rfMRI connectivity (ICA100 edge 887) | 5.5730E-01 | 2.8960E-02 | Not significant |
| 1822 | GCST90003220 | BA-exvivo lh area entorhinal | 5.5742E-01 | 2.8976E-02 | Not significant |
| 1823 | GCST90006130 | rfMRI connectivity (ICA100 edge 1277) | 5.5747E-01 | 2.8992E-02 | Not significant |
| 1824 | GCST90005203 | rfMRI connectivity (ICA100 edge 350) | 5.5797E-01 | 2.9008E-02 | Not significant |
| 1825 | GCST90003030 | aparc-a2009s rh volume G-subcallosal | 5.5832E-01 | 2.9024E-02 | Not significant |
| 1826 | GCST90002767 | Brainstem global volume Midbrain | 5.5875E-01 | 2.9039E-02 | Not significant |
| 1827 | GCST90006088 | rfMRI connectivity (ICA100 edge 1235) | 5.5881E-01 | 2.9055E-02 | Not significant |
| 1828 | GCST90004891 | rfMRI connectivity (ICA100 edge 38) | 5.5900E-01 | 2.9071E-02 | Not significant |
| 1829 | GCST90005695 | rfMRI connectivity (ICA100 edge 842) | 5.5933E-01 | 2.9087E-02 | Not significant |
| 1830 | GCST90004729 | rfMRI connectivity (ICA25 edge 86) | 5.5976E-01 | 2.9103E-02 | Not significant |
| 1831 | GCST90004961 | rfMRI connectivity (ICA100 edge 108) | 5.5990E-01 | 2.9119E-02 | Not significant |
| 1832 | GCST90004012 | IDP dMRI ProbtrackX MO ifo l | 5.6043E-01 | 2.9135E-02 | Not significant |
| 1833 | GCST90003417 | aparc-a2009s rh area S-circular-insula-ant | 5.6053E-01 | 2.9151E-02 | Not significant |
| 1834 | GCST90006300 | rfMRI connectivity (ICA100 edge 1447) | 5.6072E-01 | 2.9167E-02 | Not significant |
| 1835 | GCST90003161 | aparc-pial lh area pericalcarine | 5.6096E-01 | 2.9183E-02 | Not significant |
| 1836 | GCST90005940 | rfMRI connectivity (ICA100 edge 1087) | 5.6226E-01 | 2.9198E-02 | Not significant |
| 1837 | GCST90005996 | rfMRI connectivity (ICA100 edge 1143) | 5.6239E-01 | 2.9214E-02 | Not significant |
| 1838 | GCST90006181 | rfMRI connectivity (ICA100 edge 1328) | 5.6283E-01 | 2.9230E-02 | Not significant |
| 1839 | GCST90003377 | aparc-a2009s rh area G+S-cingul-Mid-Ant | 5.6309E-01 | 2.9246E-02 | Not significant |
| 1840 | GCST90004393 | IDP dMRI ProbtrackX ICVF ml r | 5.6330E-01 | 2.9262E-02 | Not significant |
| 1841 | GCST90003080 | aparc-Desikan lh area inferiorparietal | 5.6331E-01 | 2.9278E-02 | Not significant |
| 1842 | GCST90004920 | rfMRI connectivity (ICA100 edge 67) | 5.6334E-01 | 2.9294E-02 | Not significant |
| 1843 | GCST90005109 | rfMRI connectivity (ICA100 edge 256) | 5.6341E-01 | 2.9310E-02 | Not significant |
| 1844 | GCST90004420 | IDP dMRI TBSS OD Posterior limb of internal capsule R | 5.6374E-01 | 2.9326E-02 | Not significant |
| 1845 | GCST90004528 | IDP dMRI ProbtrackX ISOVF atr r | 5.6407E-01 | 2.9342E-02 | Not significant |
| 1846 | GCST90002622 | aseg lh volume Putamen | 5.6440E-01 | 2.9358E-02 | Not significant |
| 1847 | GCST90002581 | IDP T1 FAST ROIs L cerebellum VIIIb | 5.6500E-01 | 2.9373E-02 | Not significant |
| 1848 | GCST90002462 | IDP T1 FAST ROIs R inf front gyrus parsop | 5.6516E-01 | 2.9389E-02 | Not significant |
| 1849 | GCST90004873 | rfMRI connectivity (ICA100 edge 20) | 5.6536E-01 | 2.9405E-02 | Not significant |
| 1850 | GCST90003401 | aparc-a2009s rh area G-rectus | 5.6540E-01 | 2.9421E-02 | Not significant |
| 1851 | GCST90002515 | IDP T1 FAST ROIs L front orb cortex | 5.6549E-01 | 2.9437E-02 | Not significant |
| 1852 | GCST90004571 | rfMRI amplitudes (ICA25 node 4) | 5.6598E-01 | 2.9453E-02 | Not significant |
| 1853 | GCST90003326 | aparc-a2009s lh area G-precuneus | 5.6603E-01 | 2.9469E-02 | Not significant |
| 1854 | GCST90005172 | rfMRI connectivity (ICA100 edge 319) | 5.6611E-01 | 2.9485E-02 | Not significant |
| 1855 | GCST90006326 | rfMRI connectivity (ICA100 edge 1473) | 5.6663E-01 | 2.9501E-02 | Not significant |
| 1856 | GCST90004368 | IDP dMRI TBSS ICVF Superior longitudinal fasciculus L | 5.6690E-01 | 2.9517E-02 | Not significant |
| 1857 | GCST90002475 | IDP T1 FAST ROIs L mid temp gyrus tempocc | 5.6706E-01 | 2.9532E-02 | Not significant |
| 1858 | GCST90005493 | rfMRI connectivity (ICA100 edge 640) | 5.6728E-01 | 2.9548E-02 | Not significant |
| 1859 | GCST90002556 | IDP T1 FAST ROIs R hippocampus | 5.6737E-01 | 2.9564E-02 | Not significant |
| 1860 | GCST90005437 | rfMRI connectivity (ICA100 edge 584) | 5.6800E-01 | 2.9580E-02 | Not significant |
| 1861 | GCST90004197 | IDP dMRI TBSS L3 Posterior corona radiata R | 5.6804E-01 | 2.9596E-02 | Not significant |
| 1862 | GCST90002489 | IDP T1 FAST ROIs L supramarg gyrus post | 5.6812E-01 | 2.9612E-02 | Not significant |
| 1863 | GCST90002508 | IDP T1 FAST ROIs R cing gyrus ant | 5.6817E-01 | 2.9628E-02 | Not significant |
| 1864 | GCST90004139 | IDP dMRI TBSS L2 Anterior limb of internal capsule R | 5.6861E-01 | 2.9644E-02 | Not significant |
| 1865 | GCST90003439 | aparc-a2009s rh area S-precentral-sup-part | 5.6924E-01 | 2.9660E-02 | Not significant |
| 1866 | GCST90002519 | IDP T1 FAST ROIs L parahipp gyrus post | 5.6979E-01 | 2.9676E-02 | Not significant |
| 1867 | GCST90004581 | rfMRI amplitudes (ICA25 node 14) | 5.7007E-01 | 2.9691E-02 | Not significant |
| 1868 | GCST90003792 | wg lh intensity-contrast unknown | 5.7015E-01 | 2.9707E-02 | Not significant |
| 1869 | GCST90004610 | rfMRI amplitudes (ICA100 node 22) | 5.7039E-01 | 2.9723E-02 | Not significant |
| 1870 | GCST90004109 | IDP dMRI TBSS L1 Cingulum cingulate gyrus R | 5.7064E-01 | 2.9739E-02 | Not significant |
| 1871 | GCST90005441 | rfMRI connectivity (ICA100 edge 588) | 5.7088E-01 | 2.9755E-02 | Not significant |
| 1872 | GCST90005901 | rfMRI connectivity (ICA100 edge 1048) | 5.7150E-01 | 2.9771E-02 | Not significant |
| 1873 | GCST90002729 | ThalamNuclei lh volume CL | 5.7172E-01 | 2.9787E-02 | Not significant |
| 1874 | GCST90005801 | rfMRI connectivity (ICA100 edge 948) | 5.7179E-01 | 2.9803E-02 | Not significant |
| 1875 | GCST90005926 | rfMRI connectivity (ICA100 edge 1073) | 5.7207E-01 | 2.9819E-02 | Not significant |
| 1876 | GCST90003754 | aseg global intensity Brain-Stem | 5.7217E-01 | 2.9835E-02 | Not significant |
| 1877 | GCST90004305 | IDP dMRI ProbtrackX L3 cgc r | 5.7227E-01 | 2.9851E-02 | Not significant |
| 1878 | GCST90002702 | HippSubfield rh volume CA3-body | 5.7230E-01 | 2.9866E-02 | Not significant |
| 1879 | GCST90005921 | rfMRI connectivity (ICA100 edge 1068) | 5.7244E-01 | 2.9882E-02 | Not significant |
| 1880 | GCST90005320 | rfMRI connectivity (ICA100 edge 467) | 5.7267E-01 | 2.9898E-02 | Not significant |
| 1881 | GCST90003363 | aparc-a2009s lh area S-postcentral | 5.7268E-01 | 2.9914E-02 | Not significant |
| 1882 | GCST90004279 | IDP dMRI ProbtrackX L2 cgh l | 5.7386E-01 | 2.9930E-02 | Not significant |
| 1883 | GCST90006267 | rfMRI connectivity (ICA100 edge 1414) | 5.7389E-01 | 2.9946E-02 | Not significant |
| 1884 | GCST90004921 | rfMRI connectivity (ICA100 edge 68) | 5.7392E-01 | 2.9962E-02 | Not significant |
| 1885 | GCST90004077 | IDP dMRI TBSS L1 Genu of corpus callosum | 5.7403E-01 | 2.9978E-02 | Not significant |
| 1886 | GCST90002620 | aseg lh volume Thalamus-Proper | 5.7410E-01 | 2.9994E-02 | Not significant |
| 1887 | GCST90003306 | aparc-a2009s lh area G-cingul-Post-ventral | 5.7429E-01 | 3.0010E-02 | Not significant |
| 1888 | GCST90005832 | rfMRI connectivity (ICA100 edge 979) | 5.7431E-01 | 3.0025E-02 | Not significant |
| 1889 | GCST90006343 | rfMRI connectivity ICA-features 5 | 5.7460E-01 | 3.0041E-02 | Not significant |
| 1890 | GCST90005569 | rfMRI connectivity (ICA100 edge 716) | 5.7493E-01 | 3.0057E-02 | Not significant |
| 1891 | GCST90002582 | IDP T1 FAST ROIs V cerebellum VIIIb | 5.7549E-01 | 3.0073E-02 | Not significant |
| 1892 | GCST90004569 | rfMRI amplitudes (ICA25 node 2) | 5.7646E-01 | 3.0089E-02 | Not significant |
| 1893 | GCST90003832 | wg rh intensity-contrast entorhinal | 5.7678E-01 | 3.0105E-02 | Not significant |
| 1894 | GCST90006120 | rfMRI connectivity (ICA100 edge 1267) | 5.7680E-01 | 3.0121E-02 | Not significant |
| 1895 | GCST90002552 | IDP T1 FAST ROIs R putamen | 5.7747E-01 | 3.0137E-02 | Not significant |
| 1896 | GCST90005888 | rfMRI connectivity (ICA100 edge 1035) | 5.7748E-01 | 3.0153E-02 | Not significant |
| 1897 | GCST90005575 | rfMRI connectivity (ICA100 edge 722) | 5.7821E-01 | 3.0169E-02 | Not significant |
| 1898 | GCST90005049 | rfMRI connectivity (ICA100 edge 196) | 5.7850E-01 | 3.0184E-02 | Not significant |
| 1899 | GCST90005207 | rfMRI connectivity (ICA100 edge 354) | 5.7875E-01 | 3.0200E-02 | Not significant |
| 1900 | GCST90003684 | aparc-a2009s rh thickness G+S-cingul-Mid-Post | 5.7877E-01 | 3.0216E-02 | Not significant |
| 1901 | GCST90004504 | IDP dMRI TBSS ISOVF Posterior corona radiata L | 5.7917E-01 | 3.0232E-02 | Not significant |
| 1902 | GCST90002458 | IDP T1 FAST ROIs R mid front gyrus | 5.7938E-01 | 3.0248E-02 | Not significant |
| 1903 | GCST90003291 | aparc-DKTatlas rh area superiorfrontal | 5.7956E-01 | 3.0264E-02 | Not significant |
| 1904 | GCST90003608 | aparc-a2009s lh thickness G+S-cingul-Ant | 5.8066E-01 | 3.0280E-02 | Not significant |
| 1905 | GCST90005907 | rfMRI connectivity (ICA100 edge 1054) | 5.8079E-01 | 3.0296E-02 | Not significant |
| 1906 | GCST90003769 | aseg lh intensity Caudate | 5.8083E-01 | 3.0312E-02 | Not significant |
| 1907 | GCST90005464 | rfMRI connectivity (ICA100 edge 611) | 5.8088E-01 | 3.0328E-02 | Not significant |
| 1908 | GCST90005782 | rfMRI connectivity (ICA100 edge 929) | 5.8099E-01 | 3.0344E-02 | Not significant |
| 1909 | GCST90003072 | aparc-a2009s rh volume S-temporal-transverse | 5.8130E-01 | 3.0359E-02 | Not significant |
| 1910 | GCST90005555 | rfMRI connectivity (ICA100 edge 702) | 5.8147E-01 | 3.0375E-02 | Not significant |
| 1911 | GCST90003292 | aparc-DKTatlas rh area superiorparietal | 5.8157E-01 | 3.0391E-02 | Not significant |
| 1912 | GCST90006274 | rfMRI connectivity (ICA100 edge 1421) | 5.8196E-01 | 3.0407E-02 | Not significant |
| 1913 | GCST90002685 | HippSubfield lh volume CA3-head | 5.8199E-01 | 3.0423E-02 | Not significant |
| 1914 | GCST90005545 | rfMRI connectivity (ICA100 edge 692) | 5.8233E-01 | 3.0439E-02 | Not significant |
| 1915 | GCST90005343 | rfMRI connectivity (ICA100 edge 490) | 5.8272E-01 | 3.0455E-02 | Not significant |
| 1916 | GCST90003133 | aparc-Desikan rh area rostralmiddlefrontal | 5.8283E-01 | 3.0471E-02 | Not significant |
| 1917 | GCST90004766 | rfMRI connectivity (ICA25 edge 123) | 5.8304E-01 | 3.0487E-02 | Not significant |
| 1918 | GCST90005650 | rfMRI connectivity (ICA100 edge 797) | 5.8310E-01 | 3.0503E-02 | Not significant |
| 1919 | GCST90004557 | IDP tfMRI 90th-percentile BOLD faces | 5.8326E-01 | 3.0518E-02 | Not significant |
| 1920 | GCST90006229 | rfMRI connectivity (ICA100 edge 1376) | 5.8329E-01 | 3.0534E-02 | Not significant |
| 1921 | GCST90003799 | wg lh intensity-contrast inferiorparietal | 5.8333E-01 | 3.0550E-02 | Not significant |
| 1922 | GCST90004243 | IDP dMRI ProbtrackX MD str r | 5.8366E-01 | 3.0566E-02 | Not significant |
| 1923 | GCST90004001 | IDP dMRI ProbtrackX MO ar r | 5.8377E-01 | 3.0582E-02 | Not significant |
| 1924 | GCST90003344 | aparc-a2009s lh area S-circular-insula-inf | 5.8379E-01 | 3.0598E-02 | Not significant |
| 1925 | GCST90004057 | IDP dMRI TBSS MD Sagittal stratum R | 5.8389E-01 | 3.0614E-02 | Not significant |
| 1926 | GCST90002761 | ThalamNuclei rh volume LD | 5.8403E-01 | 3.0630E-02 | Not significant |
| 1927 | GCST90003466 | aparc-Desikan lh thickness postcentral | 5.8421E-01 | 3.0646E-02 | Not significant |
| 1928 | GCST90005376 | rfMRI connectivity (ICA100 edge 523) | 5.8464E-01 | 3.0662E-02 | Not significant |
| 1929 | GCST90005372 | rfMRI connectivity (ICA100 edge 519) | 5.8579E-01 | 3.0677E-02 | Not significant |
| 1930 | GCST90004530 | IDP dMRI ProbtrackX ISOVF cgc r | 5.8583E-01 | 3.0693E-02 | Not significant |
| 1931 | GCST90006015 | rfMRI connectivity (ICA100 edge 1162) | 5.8585E-01 | 3.0709E-02 | Not significant |
| 1932 | GCST90005775 | rfMRI connectivity (ICA100 edge 922) | 5.8590E-01 | 3.0725E-02 | Not significant |
| 1933 | GCST90003667 | aparc-a2009s lh thickness S-parieto-occipital | 5.8608E-01 | 3.0741E-02 | Not significant |
| 1934 | GCST90005548 | rfMRI connectivity (ICA100 edge 695) | 5.8635E-01 | 3.0757E-02 | Not significant |
| 1935 | GCST90003839 | wg rh intensity-contrast lingual | 5.8645E-01 | 3.0773E-02 | Not significant |
| 1936 | GCST90003973 | IDP dMRI TBSS MO Retrolenticular part of internal capsule L | 5.8688E-01 | 3.0789E-02 | Not significant |
| 1937 | GCST90002700 | HippSubfield rh volume molecular-layer-HP-body | 5.8694E-01 | 3.0805E-02 | Not significant |
| 1938 | GCST90003089 | aparc-Desikan lh area paracentral | 5.8702E-01 | 3.0821E-02 | Not significant |
| 1939 | GCST90006062 | rfMRI connectivity (ICA100 edge 1209) | 5.8703E-01 | 3.0837E-02 | Not significant |
| 1940 | GCST90005518 | rfMRI connectivity (ICA100 edge 665) | 5.8718E-01 | 3.0852E-02 | Not significant |
| 1941 | GCST90004005 | IDP dMRI ProbtrackX MO cgc r | 5.8770E-01 | 3.0868E-02 | Not significant |
| 1942 | GCST90002479 | IDP T1 FAST ROIs L inf temp gyrus post | 5.8807E-01 | 3.0884E-02 | Not significant |
| 1943 | GCST90005185 | rfMRI connectivity (ICA100 edge 332) | 5.8817E-01 | 3.0900E-02 | Not significant |
| 1944 | GCST90005397 | rfMRI connectivity (ICA100 edge 544) | 5.8915E-01 | 3.0916E-02 | Not significant |
| 1945 | GCST90005751 | rfMRI connectivity (ICA100 edge 898) | 5.8981E-01 | 3.0932E-02 | Not significant |
| 1946 | GCST90003408 | aparc-a2009s rh area G-temporal-middle | 5.9020E-01 | 3.0948E-02 | Not significant |
| 1947 | GCST90004159 | IDP dMRI TBSS L2 Cingulum hippocampus R | 5.9062E-01 | 3.0964E-02 | Not significant |
| 1948 | GCST90003421 | aparc-a2009s rh area S-collat-transv-post | 5.9063E-01 | 3.0980E-02 | Not significant |
| 1949 | GCST90003005 | aparc-a2009s rh volume G+S-cingul-Mid-Ant | 5.9097E-01 | 3.0996E-02 | Not significant |
| 1950 | GCST90005631 | rfMRI connectivity (ICA100 edge 778) | 5.9108E-01 | 3.1011E-02 | Not significant |
| 1951 | GCST90006070 | rfMRI connectivity (ICA100 edge 1217) | 5.9126E-01 | 3.1027E-02 | Not significant |
| 1952 | GCST90005460 | rfMRI connectivity (ICA100 edge 607) | 5.9127E-01 | 3.1043E-02 | Not significant |
| 1953 | GCST90005706 | rfMRI connectivity (ICA100 edge 853) | 5.9167E-01 | 3.1059E-02 | Not significant |
| 1954 | GCST90003108 | aparc-Desikan rh area bankssts | 5.9186E-01 | 3.1075E-02 | Not significant |
| 1955 | GCST90005945 | rfMRI connectivity (ICA100 edge 1092) | 5.9224E-01 | 3.1091E-02 | Not significant |
| 1956 | GCST90004023 | IDP dMRI ProbtrackX MO str l | 5.9237E-01 | 3.1107E-02 | Not significant |
| 1957 | GCST90005248 | rfMRI connectivity (ICA100 edge 395) | 5.9246E-01 | 3.1123E-02 | Not significant |
| 1958 | GCST90004929 | rfMRI connectivity (ICA100 edge 76) | 5.9249E-01 | 3.1139E-02 | Not significant |
| 1959 | GCST90006161 | rfMRI connectivity (ICA100 edge 1308) | 5.9275E-01 | 3.1155E-02 | Not significant |
| 1960 | GCST90003830 | wg rh intensity-contrast caudalmiddlefrontal | 5.9419E-01 | 3.1170E-02 | Not significant |
| 1961 | GCST90006336 | rfMRI connectivity (ICA100 edge 1483) | 5.9451E-01 | 3.1186E-02 | Not significant |
| 1962 | GCST90003650 | aparc-a2009s lh thickness S-circular-insula-inf | 5.9455E-01 | 3.1202E-02 | Not significant |
| 1963 | GCST90005001 | rfMRI connectivity (ICA100 edge 148) | 5.9483E-01 | 3.1218E-02 | Not significant |
| 1964 | GCST90004788 | rfMRI connectivity (ICA25 edge 145) | 5.9514E-01 | 3.1234E-02 | Not significant |
| 1965 | GCST90003286 | aparc-DKTatlas rh area posteriorcingulate | 5.9535E-01 | 3.1250E-02 | Not significant |
| 1966 | GCST90003780 | aseg rh intensity Cerebellum-White-Matter | 5.9555E-01 | 3.1266E-02 | Not significant |
| 1967 | GCST90003518 | BA-exvivo lh thickness BA4p | 5.9559E-01 | 3.1282E-02 | Not significant |
| 1968 | GCST90002439 | IDP T1 FIRST right caudate volume | 5.9569E-01 | 3.1298E-02 | Not significant |
| 1969 | GCST90005059 | rfMRI connectivity (ICA100 edge 206) | 5.9576E-01 | 3.1314E-02 | Not significant |
| 1970 | GCST90002939 | aparc-a2009s lh volume G-front-middle | 5.9594E-01 | 3.1330E-02 | Not significant |
| 1971 | GCST90004409 | IDP dMRI TBSS OD Corticospinal tract L | 5.9599E-01 | 3.1345E-02 | Not significant |
| 1972 | GCST90006067 | rfMRI connectivity (ICA100 edge 1214) | 5.9613E-01 | 3.1361E-02 | Not significant |
| 1973 | GCST90003402 | aparc-a2009s rh area G-subcallosal | 5.9624E-01 | 3.1377E-02 | Not significant |
| 1974 | GCST90004754 | rfMRI connectivity (ICA25 edge 111) | 5.9650E-01 | 3.1393E-02 | Not significant |
| 1975 | GCST90005537 | rfMRI connectivity (ICA100 edge 684) | 5.9665E-01 | 3.1409E-02 | Not significant |
| 1976 | GCST90005019 | rfMRI connectivity (ICA100 edge 166) | 5.9685E-01 | 3.1425E-02 | Not significant |
| 1977 | GCST90005016 | rfMRI connectivity (ICA100 edge 163) | 5.9691E-01 | 3.1441E-02 | Not significant |
| 1978 | GCST90002808 | aparc-Desikan rh volume inferiorparietal | 5.9696E-01 | 3.1457E-02 | Not significant |
| 1979 | GCST90003520 | BA-exvivo lh thickness BA44 | 5.9702E-01 | 3.1473E-02 | Not significant |
| 1980 | GCST90006003 | rfMRI connectivity (ICA100 edge 1150) | 5.9755E-01 | 3.1489E-02 | Not significant |
| 1981 | GCST90002720 | ThalamNuclei lh volume PuA | 5.9773E-01 | 3.1504E-02 | Not significant |
| 1982 | GCST90003025 | aparc-a2009s rh volume G-parietal-sup | 5.9795E-01 | 3.1520E-02 | Not significant |
| 1983 | GCST90004775 | rfMRI connectivity (ICA25 edge 132) | 5.9796E-01 | 3.1536E-02 | Not significant |
| 1984 | GCST90004216 | IDP dMRI TBSS L3 Uncinate fasciculus L | 5.9798E-01 | 3.1552E-02 | Not significant |
| 1985 | GCST90006148 | rfMRI connectivity (ICA100 edge 1295) | 5.9849E-01 | 3.1568E-02 | Not significant |
| 1986 | GCST90006079 | rfMRI connectivity (ICA100 edge 1226) | 5.9859E-01 | 3.1584E-02 | Not significant |
| 1987 | GCST90005031 | rfMRI connectivity (ICA100 edge 178) | 5.9873E-01 | 3.1600E-02 | Not significant |
| 1988 | GCST90002474 | IDP T1 FAST ROIs R mid temp gyrus post | 5.9880E-01 | 3.1616E-02 | Not significant |
| 1989 | GCST90003609 | aparc-a2009s lh thickness G+S-cingul-Mid-Ant | 5.9888E-01 | 3.1632E-02 | Not significant |
| 1990 | GCST90002499 | IDP T1 FAST ROIs L front med cortex | 5.9926E-01 | 3.1648E-02 | Not significant |
| 1991 | GCST90003323 | aparc-a2009s lh area G-parietal-sup | 5.9942E-01 | 3.1663E-02 | Not significant |
| 1992 | GCST90004661 | rfMRI connectivity (ICA25 edge 18) | 5.9944E-01 | 3.1679E-02 | Not significant |
| 1993 | GCST90003934 | IDP dMRI ProbtrackX FA cst r | 5.9958E-01 | 3.1695E-02 | Not significant |
| 1994 | GCST90003598 | aparc-DKTatlas rh thickness superiorparietal | 5.9997E-01 | 3.1711E-02 | Not significant |
| 1995 | GCST90004922 | rfMRI connectivity (ICA100 edge 69) | 6.0008E-01 | 3.1727E-02 | Not significant |
| 1996 | GCST90005497 | rfMRI connectivity (ICA100 edge 644) | 6.0067E-01 | 3.1743E-02 | Not significant |
| 1997 | GCST90002610 | aseg global volume CC-Mid-Anterior | 6.0080E-01 | 3.1759E-02 | Not significant |
| 1998 | GCST90002932 | aparc-a2009s lh volume G+S-cingul-Mid-Post | 6.0085E-01 | 3.1775E-02 | Not significant |
| 1999 | GCST90003927 | IDP dMRI ProbtrackX FA atr l | 6.0094E-01 | 3.1791E-02 | Not significant |
| 2000 | GCST90006297 | rfMRI connectivity (ICA100 edge 1444) | 6.0105E-01 | 3.1807E-02 | Not significant |
| 2001 | GCST90003129 | aparc-Desikan rh area posteriorcingulate | 6.0138E-01 | 3.1823E-02 | Not significant |
| 2002 | GCST90005605 | rfMRI connectivity (ICA100 edge 752) | 6.0147E-01 | 3.1838E-02 | Not significant |
| 2003 | GCST90005043 | rfMRI connectivity (ICA100 edge 190) | 6.0201E-01 | 3.1854E-02 | Not significant |
| 2004 | GCST90006162 | rfMRI connectivity (ICA100 edge 1309) | 6.0246E-01 | 3.1870E-02 | Not significant |
| 2005 | GCST90003750 | aparc-a2009s rh thickness S-temporal-transverse | 6.0249E-01 | 3.1886E-02 | Not significant |
| 2006 | GCST90005843 | rfMRI connectivity (ICA100 edge 990) | 6.0250E-01 | 3.1902E-02 | Not significant |
| 2007 | GCST90006247 | rfMRI connectivity (ICA100 edge 1394) | 6.0257E-01 | 3.1918E-02 | Not significant |
| 2008 | GCST90005868 | rfMRI connectivity (ICA100 edge 1015) | 6.0286E-01 | 3.1934E-02 | Not significant |
| 2009 | GCST90005096 | rfMRI connectivity (ICA100 edge 243) | 6.0297E-01 | 3.1950E-02 | Not significant |
| 2010 | GCST90003307 | aparc-a2009s lh area G-cuneus | 6.0298E-01 | 3.1966E-02 | Not significant |
| 2011 | GCST90006043 | rfMRI connectivity (ICA100 edge 1190) | 6.0310E-01 | 3.1982E-02 | Not significant |
| 2012 | GCST90004232 | IDP dMRI ProbtrackX MD ifo r | 6.0311E-01 | 3.1997E-02 | Not significant |
| 2013 | GCST90003406 | aparc-a2009s rh area G-temp-sup-Plan-tempo | 6.0317E-01 | 3.2013E-02 | Not significant |
| 2014 | GCST90005485 | rfMRI connectivity (ICA100 edge 632) | 6.0320E-01 | 3.2029E-02 | Not significant |
| 2015 | GCST90004069 | IDP dMRI TBSS MD Superior fronto-occipital fasciculus R | 6.0339E-01 | 3.2045E-02 | Not significant |
| 2016 | GCST90005766 | rfMRI connectivity (ICA100 edge 913) | 6.0355E-01 | 3.2061E-02 | Not significant |
| 2017 | GCST90004627 | rfMRI amplitudes (ICA100 node 39) | 6.0382E-01 | 3.2077E-02 | Not significant |
| 2018 | GCST90005876 | rfMRI connectivity (ICA100 edge 1023) | 6.0385E-01 | 3.2093E-02 | Not significant |
| 2019 | GCST90006190 | rfMRI connectivity (ICA100 edge 1337) | 6.0397E-01 | 3.2109E-02 | Not significant |
| 2020 | GCST90005453 | rfMRI connectivity (ICA100 edge 600) | 6.0400E-01 | 3.2125E-02 | Not significant |
| 2021 | GCST90005214 | rfMRI connectivity (ICA100 edge 361) | 6.0412E-01 | 3.2141E-02 | Not significant |
| 2022 | GCST90004317 | IDP dMRI ProbtrackX L3 ml l | 6.0418E-01 | 3.2156E-02 | Not significant |
| 2023 | GCST90005415 | rfMRI connectivity (ICA100 edge 562) | 6.0426E-01 | 3.2172E-02 | Not significant |
| 2024 | GCST90005011 | rfMRI connectivity (ICA100 edge 158) | 6.0464E-01 | 3.2188E-02 | Not significant |
| 2025 | GCST90005356 | rfMRI connectivity (ICA100 edge 503) | 6.0471E-01 | 3.2204E-02 | Not significant |
| 2026 | GCST90003056 | aparc-a2009s rh volume S-oc-sup+transversal | 6.0528E-01 | 3.2220E-02 | Not significant |
| 2027 | GCST90004386 | IDP dMRI ProbtrackX ICVF fmi | 6.0529E-01 | 3.2236E-02 | Not significant |
| 2028 | GCST90006126 | rfMRI connectivity (ICA100 edge 1273) | 6.0534E-01 | 3.2252E-02 | Not significant |
| 2029 | GCST90004592 | rfMRI amplitudes (ICA100 node 4) | 6.0548E-01 | 3.2268E-02 | Not significant |
| 2030 | GCST90003612 | aparc-a2009s lh thickness G-cingul-Post-ventral | 6.0569E-01 | 3.2284E-02 | Not significant |
| 2031 | GCST90004464 | IDP dMRI ProbtrackX OD ilf l | 6.0596E-01 | 3.2300E-02 | Not significant |
| 2032 | GCST90002710 | HippSubfield rh volume Whole-hippocampal-head | 6.0604E-01 | 3.2316E-02 | Not significant |
| 2033 | GCST90003820 | wg lh intensity-contrast superiorparietal | 6.0636E-01 | 3.2331E-02 | Not significant |
| 2034 | GCST90004659 | rfMRI connectivity (ICA25 edge 16) | 6.0682E-01 | 3.2347E-02 | Not significant |
| 2035 | GCST90006309 | rfMRI connectivity (ICA100 edge 1456) | 6.0709E-01 | 3.2363E-02 | Not significant |
| 2036 | GCST90002662 | AmygNuclei rh volume Central-nucleus | 6.0733E-01 | 3.2379E-02 | Not significant |
| 2037 | GCST90003688 | aparc-a2009s rh thickness G-front-inf-Opercular | 6.0769E-01 | 3.2395E-02 | Not significant |
| 2038 | GCST90004213 | IDP dMRI TBSS L3 Superior fronto-occipital fasciculus R | 6.0771E-01 | 3.2411E-02 | Not significant |
| 2039 | GCST90005891 | rfMRI connectivity (ICA100 edge 1038) | 6.0797E-01 | 3.2427E-02 | Not significant |
| 2040 | GCST90004485 | IDP dMRI TBSS ISOVF Medial lemniscus R | 6.0801E-01 | 3.2443E-02 | Not significant |
| 2041 | GCST90004186 | IDP dMRI TBSS L3 Cerebral peduncle L | 6.0841E-01 | 3.2459E-02 | Not significant |
| 2042 | GCST90005641 | rfMRI connectivity (ICA100 edge 788) | 6.0848E-01 | 3.2475E-02 | Not significant |
| 2043 | GCST90005051 | rfMRI connectivity (ICA100 edge 198) | 6.0887E-01 | 3.2490E-02 | Not significant |
| 2044 | GCST90003451 | aparc-Desikan lh thickness fusiform | 6.0898E-01 | 3.2506E-02 | Not significant |
| 2045 | GCST90002873 | aparc-DKTatlas lh volume lingual | 6.0910E-01 | 3.2522E-02 | Not significant |
| 2046 | GCST90003763 | aseg global intensity CC-Anterior | 6.0926E-01 | 3.2538E-02 | Not significant |
| 2047 | GCST90005685 | rfMRI connectivity (ICA100 edge 832) | 6.0957E-01 | 3.2554E-02 | Not significant |
| 2048 | GCST90003891 | IDP dMRI TBSS FA Cerebral peduncle R | 6.0966E-01 | 3.2570E-02 | Not significant |
| 2049 | GCST90004802 | rfMRI connectivity (ICA25 edge 159) | 6.1014E-01 | 3.2586E-02 | Not significant |
| 2050 | GCST90005222 | rfMRI connectivity (ICA100 edge 369) | 6.1034E-01 | 3.2602E-02 | Not significant |
| 2051 | GCST90006119 | rfMRI connectivity (ICA100 edge 1266) | 6.1067E-01 | 3.2618E-02 | Not significant |
| 2052 | GCST90002874 | aparc-DKTatlas lh volume medialorbitofrontal | 6.1091E-01 | 3.2634E-02 | Not significant |
| 2053 | GCST90003574 | aparc-DKTatlas rh thickness cuneus | 6.1142E-01 | 3.2649E-02 | Not significant |
| 2054 | GCST90002838 | BA-exvivo lh volume BA3b | 6.1241E-01 | 3.2665E-02 | Not significant |
| 2055 | GCST90004378 | IDP dMRI ProbtrackX ICVF atr r | 6.1264E-01 | 3.2681E-02 | Not significant |
| 2056 | GCST90004808 | rfMRI connectivity (ICA25 edge 165) | 6.1270E-01 | 3.2697E-02 | Not significant |
| 2057 | GCST90002782 | aparc-Desikan lh volume middletemporal | 6.1342E-01 | 3.2713E-02 | Not significant |
| 2058 | GCST90005250 | rfMRI connectivity (ICA100 edge 397) | 6.1396E-01 | 3.2729E-02 | Not significant |
| 2059 | GCST90004950 | rfMRI connectivity (ICA100 edge 97) | 6.1408E-01 | 3.2745E-02 | Not significant |
| 2060 | GCST90003885 | IDP dMRI TBSS FA Medial lemniscus R | 6.1457E-01 | 3.2761E-02 | Not significant |
| 2061 | GCST90005534 | rfMRI connectivity (ICA100 edge 681) | 6.1474E-01 | 3.2777E-02 | Not significant |
| 2062 | GCST90004768 | rfMRI connectivity (ICA25 edge 125) | 6.1475E-01 | 3.2793E-02 | Not significant |
| 2063 | GCST90005748 | rfMRI connectivity (ICA100 edge 895) | 6.1505E-01 | 3.2809E-02 | Not significant |
| 2064 | GCST90003648 | aparc-a2009s lh thickness S-cingul-Marginalis | 6.1596E-01 | 3.2824E-02 | Not significant |
| 2065 | GCST90002480 | IDP T1 FAST ROIs R inf temp gyrus post | 6.1597E-01 | 3.2840E-02 | Not significant |
| 2066 | GCST90003705 | aparc-a2009s rh thickness G-precentral | 6.1602E-01 | 3.2856E-02 | Not significant |
| 2067 | GCST90002675 | HippSubfield lh volume presubiculum-body | 6.1654E-01 | 3.2872E-02 | Not significant |
| 2068 | GCST90002933 | aparc-a2009s lh volume G-cingul-Post-dorsal | 6.1710E-01 | 3.2888E-02 | Not significant |
| 2069 | GCST90002776 | aparc-Desikan lh volume inferiortemporal | 6.1769E-01 | 3.2904E-02 | Not significant |
| 2070 | GCST90003314 | aparc-a2009s lh area G-insular-short | 6.1827E-01 | 3.2920E-02 | Not significant |
| 2071 | GCST90005323 | rfMRI connectivity (ICA100 edge 470) | 6.1833E-01 | 3.2936E-02 | Not significant |
| 2072 | GCST90003575 | aparc-DKTatlas rh thickness entorhinal | 6.1854E-01 | 3.2952E-02 | Not significant |
| 2073 | GCST90002481 | IDP T1 FAST ROIs L inf temp gyrus tempocc | 6.1877E-01 | 3.2968E-02 | Not significant |
| 2074 | GCST90006057 | rfMRI connectivity (ICA100 edge 1204) | 6.1879E-01 | 3.2983E-02 | Not significant |
| 2075 | GCST90004030 | IDP dMRI TBSS MD Body of corpus callosum | 6.1972E-01 | 3.2999E-02 | Not significant |
| 2076 | GCST90004426 | IDP dMRI TBSS OD Superior corona radiata R | 6.1972E-01 | 3.3015E-02 | Not significant |
| 2077 | GCST90004979 | rfMRI connectivity (ICA100 edge 126) | 6.1972E-01 | 3.3031E-02 | Not significant |
| 2078 | GCST90002524 | IDP T1 FAST ROIs R temp fusif cortex ant | 6.1985E-01 | 3.3047E-02 | Not significant |
| 2079 | GCST90003465 | aparc-Desikan lh thickness pericalcarine | 6.1997E-01 | 3.3063E-02 | Not significant |
| 2080 | GCST90004138 | IDP dMRI TBSS L2 Cerebral peduncle L | 6.2003E-01 | 3.3079E-02 | Not significant |
| 2081 | GCST90004695 | rfMRI connectivity (ICA25 edge 52) | 6.2008E-01 | 3.3095E-02 | Not significant |
| 2082 | GCST90005060 | rfMRI connectivity (ICA100 edge 207) | 6.2008E-01 | 3.3111E-02 | Not significant |
| 2083 | GCST90004312 | IDP dMRI ProbtrackX L3 ifo l | 6.2063E-01 | 3.3127E-02 | Not significant |
| 2084 | GCST90004380 | IDP dMRI ProbtrackX ICVF cgc r | 6.2065E-01 | 3.3142E-02 | Not significant |
| 2085 | GCST90004846 | rfMRI connectivity (ICA25 edge 203) | 6.2079E-01 | 3.3158E-02 | Not significant |
| 2086 | GCST90005322 | rfMRI connectivity (ICA100 edge 469) | 6.2095E-01 | 3.3174E-02 | Not significant |
| 2087 | GCST90004412 | IDP dMRI TBSS OD Inferior cerebellar peduncle R | 6.2102E-01 | 3.3190E-02 | Not significant |
| 2088 | GCST90003438 | aparc-a2009s rh area S-precentral-inf-part | 6.2110E-01 | 3.3206E-02 | Not significant |
| 2089 | GCST90005638 | rfMRI connectivity (ICA100 edge 785) | 6.2147E-01 | 3.3222E-02 | Not significant |
| 2090 | GCST90003787 | aseg rh intensity Amygdala | 6.2170E-01 | 3.3238E-02 | Not significant |
| 2091 | GCST90003887 | IDP dMRI TBSS FA Inferior cerebellar peduncle R | 6.2310E-01 | 3.3254E-02 | Not significant |
| 2092 | GCST90006132 | rfMRI connectivity (ICA100 edge 1279) | 6.2327E-01 | 3.3270E-02 | Not significant |
| 2093 | GCST90004046 | IDP dMRI TBSS MD Posterior limb of internal capsule L | 6.2364E-01 | 3.3286E-02 | Not significant |
| 2094 | GCST90002535 | IDP T1 FAST ROIs L parietal operc cortex | 6.2378E-01 | 3.3302E-02 | Not significant |
| 2095 | GCST90004346 | IDP dMRI TBSS ICVF Posterior limb of internal capsule L | 6.2386E-01 | 3.3317E-02 | Not significant |
| 2096 | GCST90003240 | aparc-DKTatlas lh area inferiorparietal | 6.2422E-01 | 3.3333E-02 | Not significant |
| 2097 | GCST90004172 | IDP dMRI TBSS L3 Pontine crossing tract | 6.2447E-01 | 3.3349E-02 | Not significant |
| 2098 | GCST90003981 | IDP dMRI TBSS MO Posterior thalamic radiation L | 6.2454E-01 | 3.3365E-02 | Not significant |
| 2099 | GCST90003565 | aparc-DKTatlas lh thickness rostralmiddlefrontal | 6.2476E-01 | 3.3381E-02 | Not significant |
| 2100 | GCST90004693 | rfMRI connectivity (ICA25 edge 50) | 6.2491E-01 | 3.3397E-02 | Not significant |
| 2101 | GCST90003500 | aparc-Desikan rh thickness postcentral | 6.2503E-01 | 3.3413E-02 | Not significant |
| 2102 | GCST90002897 | aparc-DKTatlas rh volume entorhinal | 6.2509E-01 | 3.3429E-02 | Not significant |
| 2103 | GCST90002554 | IDP T1 FAST ROIs R pallidum | 6.2541E-01 | 3.3445E-02 | Not significant |
| 2104 | GCST90004786 | rfMRI connectivity (ICA25 edge 143) | 6.2574E-01 | 3.3461E-02 | Not significant |
| 2105 | GCST90005404 | rfMRI connectivity (ICA100 edge 551) | 6.2581E-01 | 3.3476E-02 | Not significant |
| 2106 | GCST90005479 | rfMRI connectivity (ICA100 edge 626) | 6.2584E-01 | 3.3492E-02 | Not significant |
| 2107 | GCST90002772 | aparc-Desikan lh volume cuneus | 6.2594E-01 | 3.3508E-02 | Not significant |
| 2108 | GCST90005726 | rfMRI connectivity (ICA100 edge 873) | 6.2639E-01 | 3.3524E-02 | Not significant |
| 2109 | GCST90005911 | rfMRI connectivity (ICA100 edge 1058) | 6.2650E-01 | 3.3540E-02 | Not significant |
| 2110 | GCST90006283 | rfMRI connectivity (ICA100 edge 1430) | 6.2651E-01 | 3.3556E-02 | Not significant |
| 2111 | GCST90002536 | IDP T1 FAST ROIs R parietal operc cortex | 6.2659E-01 | 3.3572E-02 | Not significant |
| 2112 | GCST90006341 | rfMRI connectivity ICA-features 3 | 6.2701E-01 | 3.3588E-02 | Not significant |
| 2113 | GCST90002667 | AmygNuclei rh volume Whole-amygdala | 6.2718E-01 | 3.3604E-02 | Not significant |
| 2114 | GCST90003274 | aparc-DKTatlas rh area lateraloccipital | 6.2757E-01 | 3.3620E-02 | Not significant |
| 2115 | GCST90005212 | rfMRI connectivity (ICA100 edge 359) | 6.2790E-01 | 3.3635E-02 | Not significant |
| 2116 | GCST90006268 | rfMRI connectivity (ICA100 edge 1415) | 6.2791E-01 | 3.3651E-02 | Not significant |
| 2117 | GCST90004367 | IDP dMRI TBSS ICVF Superior longitudinal fasciculus R | 6.2796E-01 | 3.3667E-02 | Not significant |
| 2118 | GCST90003504 | aparc-Desikan rh thickness rostralanteriorcingulate | 6.2796E-01 | 3.3683E-02 | Not significant |
| 2119 | GCST90004752 | rfMRI connectivity (ICA25 edge 109) | 6.2805E-01 | 3.3699E-02 | Not significant |
| 2120 | GCST90002919 | aparc-DKTatlas rh volume superiorfrontal | 6.2815E-01 | 3.3715E-02 | Not significant |
| 2121 | GCST90004170 | IDP dMRI TBSS L2 Tapetum L | 6.2871E-01 | 3.3731E-02 | Not significant |
| 2122 | GCST90005805 | rfMRI connectivity (ICA100 edge 952) | 6.2966E-01 | 3.3747E-02 | Not significant |
| 2123 | GCST90002785 | aparc-Desikan lh volume parsopercularis | 6.2975E-01 | 3.3763E-02 | Not significant |
| 2124 | GCST90004634 | rfMRI amplitudes (ICA100 node 46) | 6.2989E-01 | 3.3779E-02 | Not significant |
| 2125 | GCST90006013 | rfMRI connectivity (ICA100 edge 1160) | 6.3039E-01 | 3.3795E-02 | Not significant |
| 2126 | GCST90002672 | HippSubfield lh volume hippocampal-fissure | 6.3070E-01 | 3.3810E-02 | Not significant |
| 2127 | GCST90006178 | rfMRI connectivity (ICA100 edge 1325) | 6.3159E-01 | 3.3826E-02 | Not significant |
| 2128 | GCST90003109 | aparc-Desikan rh area caudalanteriorcingulate | 6.3202E-01 | 3.3842E-02 | Not significant |
| 2129 | GCST90004807 | rfMRI connectivity (ICA25 edge 164) | 6.3214E-01 | 3.3858E-02 | Not significant |
| 2130 | GCST90003730 | aparc-a2009s rh thickness S-front-sup | 6.3216E-01 | 3.3874E-02 | Not significant |
| 2131 | GCST90003448 | aparc-Desikan lh thickness caudalmiddlefrontal | 6.3247E-01 | 3.3890E-02 | Not significant |
| 2132 | GCST90002467 | IDP T1 FAST ROIs L sup temp gyrus ant | 6.3281E-01 | 3.3906E-02 | Not significant |
| 2133 | GCST90006331 | rfMRI connectivity (ICA100 edge 1478) | 6.3297E-01 | 3.3922E-02 | Not significant |
| 2134 | GCST90003502 | aparc-Desikan rh thickness precentral | 6.3309E-01 | 3.3938E-02 | Not significant |
| 2135 | GCST90004563 | IDP tfMRI 90th-percentile zstat faces-shapes | 6.3348E-01 | 3.3954E-02 | Not significant |
| 2136 | GCST90004630 | rfMRI amplitudes (ICA100 node 42) | 6.3420E-01 | 3.3969E-02 | Not significant |
| 2137 | GCST90003000 | aparc-a2009s rh volume G+S-occipital-inf | 6.3426E-01 | 3.3985E-02 | Not significant |
| 2138 | GCST90003611 | aparc-a2009s lh thickness G-cingul-Post-dorsal | 6.3430E-01 | 3.4001E-02 | Not significant |
| 2139 | GCST90005459 | rfMRI connectivity (ICA100 edge 606) | 6.3463E-01 | 3.4017E-02 | Not significant |
| 2140 | GCST90002465 | IDP T1 FAST ROIs L temporal pole | 6.3527E-01 | 3.4033E-02 | Not significant |
| 2141 | GCST90004595 | rfMRI amplitudes (ICA100 node 7) | 6.3540E-01 | 3.4049E-02 | Not significant |
| 2142 | GCST90005998 | rfMRI connectivity (ICA100 edge 1145) | 6.3547E-01 | 3.4065E-02 | Not significant |
| 2143 | GCST90003276 | aparc-DKTatlas rh area lingual | 6.3688E-01 | 3.4081E-02 | Not significant |
| 2144 | GCST90004266 | IDP dMRI ProbtrackX L1 ptr r | 6.3707E-01 | 3.4097E-02 | Not significant |
| 2145 | GCST90004534 | IDP dMRI ProbtrackX ISOVF cst r | 6.3749E-01 | 3.4113E-02 | Not significant |
| 2146 | GCST90006318 | rfMRI connectivity (ICA100 edge 1465) | 6.3756E-01 | 3.4128E-02 | Not significant |
| 2147 | GCST90006183 | rfMRI connectivity (ICA100 edge 1330) | 6.3812E-01 | 3.4144E-02 | Not significant |
| 2148 | GCST90004838 | rfMRI connectivity (ICA25 edge 195) | 6.3845E-01 | 3.4160E-02 | Not significant |
| 2149 | GCST90003013 | aparc-a2009s rh volume G-front-middle | 6.3916E-01 | 3.4176E-02 | Not significant |
| 2150 | GCST90003178 | aparc-pial rh area cuneus | 6.3934E-01 | 3.4192E-02 | Not significant |
| 2151 | GCST90006235 | rfMRI connectivity (ICA100 edge 1382) | 6.3990E-01 | 3.4208E-02 | Not significant |
| 2152 | GCST90004734 | rfMRI connectivity (ICA25 edge 91) | 6.4043E-01 | 3.4224E-02 | Not significant |
| 2153 | GCST90002635 | aseg rh volume Cerebellum-White-Matter | 6.4076E-01 | 3.4240E-02 | Not significant |
| 2154 | GCST90003416 | aparc-a2009s rh area S-cingul-Marginalis | 6.4210E-01 | 3.4256E-02 | Not significant |
| 2155 | GCST90005365 | rfMRI connectivity (ICA100 edge 512) | 6.4213E-01 | 3.4272E-02 | Not significant |
| 2156 | GCST90004713 | rfMRI connectivity (ICA25 edge 70) | 6.4257E-01 | 3.4288E-02 | Not significant |
| 2157 | GCST90005794 | rfMRI connectivity (ICA100 edge 941) | 6.4331E-01 | 3.4303E-02 | Not significant |
| 2158 | GCST90004782 | rfMRI connectivity (ICA25 edge 139) | 6.4337E-01 | 3.4319E-02 | Not significant |
| 2159 | GCST90004552 | IDP tfMRI median BOLD shapes | 6.4382E-01 | 3.4335E-02 | Not significant |
| 2160 | GCST90003837 | wg rh intensity-contrast lateraloccipital | 6.4395E-01 | 3.4351E-02 | Not significant |
| 2161 | GCST90003459 | aparc-Desikan lh thickness middletemporal | 6.4406E-01 | 3.4367E-02 | Not significant |
| 2162 | GCST90002817 | aparc-Desikan rh volume paracentral | 6.4439E-01 | 3.4383E-02 | Not significant |
| 2163 | GCST90005073 | rfMRI connectivity (ICA100 edge 220) | 6.4445E-01 | 3.4399E-02 | Not significant |
| 2164 | GCST90003149 | aparc-pial lh area inferiortemporal | 6.4447E-01 | 3.4415E-02 | Not significant |
| 2165 | GCST90003170 | aparc-pial lh area superiortemporal | 6.4502E-01 | 3.4431E-02 | Not significant |
| 2166 | GCST90004250 | IDP dMRI ProbtrackX L1 cgc l | 6.4523E-01 | 3.4447E-02 | Not significant |
| 2167 | GCST90005639 | rfMRI connectivity (ICA100 edge 786) | 6.4540E-01 | 3.4462E-02 | Not significant |
| 2168 | GCST90003800 | wg lh intensity-contrast inferiortemporal | 6.4594E-01 | 3.4478E-02 | Not significant |
| 2169 | GCST90004000 | IDP dMRI ProbtrackX MO ar l | 6.4603E-01 | 3.4494E-02 | Not significant |
| 2170 | GCST90003004 | aparc-a2009s rh volume G+S-cingul-Ant | 6.4689E-01 | 3.4510E-02 | Not significant |
| 2171 | GCST90005393 | rfMRI connectivity (ICA100 edge 540) | 6.4747E-01 | 3.4526E-02 | Not significant |
| 2172 | GCST90005654 | rfMRI connectivity (ICA100 edge 801) | 6.4772E-01 | 3.4542E-02 | Not significant |
| 2173 | GCST90003738 | aparc-a2009s rh thickness S-orbital-lateral | 6.4779E-01 | 3.4558E-02 | Not significant |
| 2174 | GCST90004093 | IDP dMRI TBSS L1 Posterior limb of internal capsule R | 6.4795E-01 | 3.4574E-02 | Not significant |
| 2175 | GCST90002965 | aparc-a2009s lh volume Lat-Fis-post | 6.4797E-01 | 3.4590E-02 | Not significant |
| 2176 | GCST90005588 | rfMRI connectivity (ICA100 edge 735) | 6.4846E-01 | 3.4606E-02 | Not significant |
| 2177 | GCST90002868 | aparc-DKTatlas lh volume inferiorparietal | 6.4850E-01 | 3.4622E-02 | Not significant |
| 2178 | GCST90002908 | aparc-DKTatlas rh volume paracentral | 6.4854E-01 | 3.4637E-02 | Not significant |
| 2179 | GCST90006146 | rfMRI connectivity (ICA100 edge 1293) | 6.4895E-01 | 3.4653E-02 | Not significant |
| 2180 | GCST90005533 | rfMRI connectivity (ICA100 edge 680) | 6.4915E-01 | 3.4669E-02 | Not significant |
| 2181 | GCST90003589 | aparc-DKTatlas rh thickness parstriangularis | 6.4920E-01 | 3.4685E-02 | Not significant |
| 2182 | GCST90002593 | aseg global volume SubCortGray | 6.4924E-01 | 3.4701E-02 | Not significant |
| 2183 | GCST90005914 | rfMRI connectivity (ICA100 edge 1061) | 6.4936E-01 | 3.4717E-02 | Not significant |
| 2184 | GCST90003134 | aparc-Desikan rh area superiorfrontal | 6.5046E-01 | 3.4733E-02 | Not significant |
| 2185 | GCST90003912 | IDP dMRI TBSS FA Cingulum cingulate gyrus L | 6.5054E-01 | 3.4749E-02 | Not significant |
| 2186 | GCST90003879 | IDP dMRI TBSS FA Genu of corpus callosum | 6.5075E-01 | 3.4765E-02 | Not significant |
| 2187 | GCST90005735 | rfMRI connectivity (ICA100 edge 882) | 6.5116E-01 | 3.4781E-02 | Not significant |
| 2188 | GCST90004593 | rfMRI amplitudes (ICA100 node 5) | 6.5129E-01 | 3.4796E-02 | Not significant |
| 2189 | GCST90003660 | aparc-a2009s lh thickness S-oc-sup+transversal | 6.5148E-01 | 3.4812E-02 | Not significant |
| 2190 | GCST90005737 | rfMRI connectivity (ICA100 edge 884) | 6.5149E-01 | 3.4828E-02 | Not significant |
| 2191 | GCST90006073 | rfMRI connectivity (ICA100 edge 1220) | 6.5160E-01 | 3.4844E-02 | Not significant |
| 2192 | GCST90005262 | rfMRI connectivity (ICA100 edge 409) | 6.5202E-01 | 3.4860E-02 | Not significant |
| 2193 | GCST90003581 | aparc-DKTatlas rh thickness lateralorbitofrontal | 6.5219E-01 | 3.4876E-02 | Not significant |
| 2194 | GCST90003058 | aparc-a2009s rh volume S-oc-temp-lat | 6.5280E-01 | 3.4892E-02 | Not significant |
| 2195 | GCST90006251 | rfMRI connectivity (ICA100 edge 1398) | 6.5295E-01 | 3.4908E-02 | Not significant |
| 2196 | GCST90003967 | IDP dMRI TBSS MO Cerebral peduncle L | 6.5317E-01 | 3.4924E-02 | Not significant |
| 2197 | GCST90003616 | aparc-a2009s lh thickness G-front-inf-Triangul | 6.5323E-01 | 3.4940E-02 | Not significant |
| 2198 | GCST90005263 | rfMRI connectivity (ICA100 edge 410) | 6.5328E-01 | 3.4955E-02 | Not significant |
| 2199 | GCST90005007 | rfMRI connectivity (ICA100 edge 154) | 6.5344E-01 | 3.4971E-02 | Not significant |
| 2200 | GCST90006100 | rfMRI connectivity (ICA100 edge 1247) | 6.5360E-01 | 3.4987E-02 | Not significant |
| 2201 | GCST90003094 | aparc-Desikan lh area postcentral | 6.5391E-01 | 3.5003E-02 | Not significant |
| 2202 | GCST90005237 | rfMRI connectivity (ICA100 edge 384) | 6.5404E-01 | 3.5019E-02 | Not significant |
| 2203 | GCST90006069 | rfMRI connectivity (ICA100 edge 1216) | 6.5410E-01 | 3.5035E-02 | Not significant |
| 2204 | GCST90005446 | rfMRI connectivity (ICA100 edge 593) | 6.5481E-01 | 3.5051E-02 | Not significant |
| 2205 | GCST90005499 | rfMRI connectivity (ICA100 edge 646) | 6.5488E-01 | 3.5067E-02 | Not significant |
| 2206 | GCST90002856 | BA-exvivo rh volume BA44 | 6.5502E-01 | 3.5083E-02 | Not significant |
| 2207 | GCST90005419 | rfMRI connectivity (ICA100 edge 566) | 6.5541E-01 | 3.5099E-02 | Not significant |
| 2208 | GCST90003698 | aparc-a2009s rh thickness G-oc-temp-med-Lingual | 6.5572E-01 | 3.5115E-02 | Not significant |
| 2209 | GCST90005613 | rfMRI connectivity (ICA100 edge 760) | 6.5585E-01 | 3.5130E-02 | Not significant |
| 2210 | GCST90004019 | IDP dMRI ProbtrackX MO ptr l | 6.5595E-01 | 3.5146E-02 | Not significant |
| 2211 | GCST90004708 | rfMRI connectivity (ICA25 edge 65) | 6.5604E-01 | 3.5162E-02 | Not significant |
| 2212 | GCST90003693 | aparc-a2009s rh thickness G-Ins-lg+S-cent-ins | 6.5649E-01 | 3.5178E-02 | Not significant |
| 2213 | GCST90003613 | aparc-a2009s lh thickness G-cuneus | 6.5659E-01 | 3.5194E-02 | Not significant |
| 2214 | GCST90004125 | IDP dMRI TBSS L2 Genu of corpus callosum | 6.5661E-01 | 3.5210E-02 | Not significant |
| 2215 | GCST90002942 | aparc-a2009s lh volume G-insular-short | 6.5715E-01 | 3.5226E-02 | Not significant |
| 2216 | GCST90003202 | aparc-pial rh area superiorparietal | 6.5717E-01 | 3.5242E-02 | Not significant |
| 2217 | GCST90004371 | IDP dMRI TBSS ICVF Uncinate fasciculus R | 6.5744E-01 | 3.5258E-02 | Not significant |
| 2218 | GCST90005930 | rfMRI connectivity (ICA100 edge 1077) | 6.5754E-01 | 3.5274E-02 | Not significant |
| 2219 | GCST90002650 | AmygNuclei lh volume Accessory-Basal-nucleus | 6.5780E-01 | 3.5289E-02 | Not significant |
| 2220 | GCST90004959 | rfMRI connectivity (ICA100 edge 106) | 6.5780E-01 | 3.5305E-02 | Not significant |
| 2221 | GCST90004750 | rfMRI connectivity (ICA25 edge 107) | 6.5816E-01 | 3.5321E-02 | Not significant |
| 2222 | GCST90004187 | IDP dMRI TBSS L3 Anterior limb of internal capsule R | 6.5833E-01 | 3.5337E-02 | Not significant |
| 2223 | GCST90006356 | QC tfMRI head motion | 6.5908E-01 | 3.5353E-02 | Not significant |
| 2224 | GCST90004601 | rfMRI amplitudes (ICA100 node 13) | 6.5909E-01 | 3.5369E-02 | Not significant |
| 2225 | GCST90004127 | IDP dMRI TBSS L2 Splenium of corpus callosum | 6.5916E-01 | 3.5385E-02 | Not significant |
| 2226 | GCST90002590 | aseg global volume BrainSeg | 6.5917E-01 | 3.5401E-02 | Not significant |
| 2227 | GCST90002961 | aparc-a2009s lh volume G-temporal-inf | 6.5942E-01 | 3.5417E-02 | Not significant |
| 2228 | GCST90003930 | IDP dMRI ProbtrackX FA cgc r | 6.5954E-01 | 3.5433E-02 | Not significant |
| 2229 | GCST90004952 | rfMRI connectivity (ICA100 edge 99) | 6.5994E-01 | 3.5448E-02 | Not significant |
| 2230 | GCST90006122 | rfMRI connectivity (ICA100 edge 1269) | 6.6013E-01 | 3.5464E-02 | Not significant |
| 2231 | GCST90003882 | IDP dMRI TBSS FA Fornix | 6.6014E-01 | 3.5480E-02 | Not significant |
| 2232 | GCST90005560 | rfMRI connectivity (ICA100 edge 707) | 6.6065E-01 | 3.5496E-02 | Not significant |
| 2233 | GCST90003757 | aseg global intensity non-WM-hypointensities | 6.6132E-01 | 3.5512E-02 | Not significant |
| 2234 | GCST90004844 | rfMRI connectivity (ICA25 edge 201) | 6.6186E-01 | 3.5528E-02 | Not significant |
| 2235 | GCST90002674 | HippSubfield lh volume CA1-head | 6.6201E-01 | 3.5544E-02 | Not significant |
| 2236 | GCST90005997 | rfMRI connectivity (ICA100 edge 1144) | 6.6254E-01 | 3.5560E-02 | Not significant |
| 2237 | GCST90006221 | rfMRI connectivity (ICA100 edge 1368) | 6.6282E-01 | 3.5576E-02 | Not significant |
| 2238 | GCST90004254 | IDP dMRI ProbtrackX L1 cst l | 6.6323E-01 | 3.5592E-02 | Not significant |
| 2239 | GCST90003834 | wg rh intensity-contrast inferiorparietal | 6.6323E-01 | 3.5608E-02 | Not significant |
| 2240 | GCST90002601 | aseg global volume 5th-Ventricle | 6.6345E-01 | 3.5623E-02 | Not significant |
| 2241 | GCST90002468 | IDP T1 FAST ROIs R sup temp gyrus ant | 6.6429E-01 | 3.5639E-02 | Not significant |
| 2242 | GCST90002602 | aseg global volume Brain-Stem | 6.6442E-01 | 3.5655E-02 | Not significant |
| 2243 | GCST90003098 | aparc-Desikan lh area rostralanteriorcingulate | 6.6447E-01 | 3.5671E-02 | Not significant |
| 2244 | GCST90004886 | rfMRI connectivity (ICA100 edge 33) | 6.6450E-01 | 3.5687E-02 | Not significant |
| 2245 | GCST90002999 | aparc-a2009s rh volume G+S-frontomargin | 6.6461E-01 | 3.5703E-02 | Not significant |
| 2246 | GCST90005337 | rfMRI connectivity (ICA100 edge 484) | 6.6471E-01 | 3.5719E-02 | Not significant |
| 2247 | GCST90004526 | IDP dMRI ProbtrackX ISOVF ar r | 6.6485E-01 | 3.5735E-02 | Not significant |
| 2248 | GCST90004196 | IDP dMRI TBSS L3 Superior corona radiata L | 6.6535E-01 | 3.5751E-02 | Not significant |
| 2249 | GCST90005293 | rfMRI connectivity (ICA100 edge 440) | 6.6551E-01 | 3.5767E-02 | Not significant |
| 2250 | GCST90002599 | aseg global volume 3rd-Ventricle | 6.6554E-01 | 3.5782E-02 | Not significant |
| 2251 | GCST90004334 | IDP dMRI TBSS ICVF Corticospinal tract L | 6.6583E-01 | 3.5798E-02 | Not significant |
| 2252 | GCST90004791 | rfMRI connectivity (ICA25 edge 148) | 6.6616E-01 | 3.5814E-02 | Not significant |
| 2253 | GCST90005514 | rfMRI connectivity (ICA100 edge 661) | 6.6636E-01 | 3.5830E-02 | Not significant |
| 2254 | GCST90002441 | IDP T1 FIRST right putamen volume | 6.6643E-01 | 3.5846E-02 | Not significant |
| 2255 | GCST90005626 | rfMRI connectivity (ICA100 edge 773) | 6.6670E-01 | 3.5862E-02 | Not significant |
| 2256 | GCST90003808 | wg lh intensity-contrast paracentral | 6.6672E-01 | 3.5878E-02 | Not significant |
| 2257 | GCST90005069 | rfMRI connectivity (ICA100 edge 216) | 6.6678E-01 | 3.5894E-02 | Not significant |
| 2258 | GCST90003590 | aparc-DKTatlas rh thickness pericalcarine | 6.6725E-01 | 3.5910E-02 | Not significant |
| 2259 | GCST90004255 | IDP dMRI ProbtrackX L1 cst r | 6.6731E-01 | 3.5926E-02 | Not significant |
| 2260 | GCST90006049 | rfMRI connectivity (ICA100 edge 1196) | 6.6769E-01 | 3.5941E-02 | Not significant |
| 2261 | GCST90002500 | IDP T1 FAST ROIs R front med cortex | 6.6778E-01 | 3.5957E-02 | Not significant |
| 2262 | GCST90004323 | IDP dMRI ProbtrackX L3 str l | 6.6784E-01 | 3.5973E-02 | Not significant |
| 2263 | GCST90002902 | aparc-DKTatlas rh volume lateraloccipital | 6.6826E-01 | 3.5989E-02 | Not significant |
| 2264 | GCST90002596 | aseg global volume SupraTentorialNotVent | 6.6854E-01 | 3.6005E-02 | Not significant |
| 2265 | GCST90002478 | IDP T1 FAST ROIs R inf temp gyrus ant | 6.6868E-01 | 3.6021E-02 | Not significant |
| 2266 | GCST90004672 | rfMRI connectivity (ICA25 edge 29) | 6.6912E-01 | 3.6037E-02 | Not significant |
| 2267 | GCST90004458 | IDP dMRI ProbtrackX OD cst l | 6.6952E-01 | 3.6053E-02 | Not significant |
| 2268 | GCST90005431 | rfMRI connectivity (ICA100 edge 578) | 6.6966E-01 | 3.6069E-02 | Not significant |
| 2269 | GCST90003539 | BA-exvivo rh thickness perirhinal | 6.6985E-01 | 3.6085E-02 | Not significant |
| 2270 | GCST90005979 | rfMRI connectivity (ICA100 edge 1126) | 6.6992E-01 | 3.6101E-02 | Not significant |
| 2271 | GCST90004843 | rfMRI connectivity (ICA25 edge 200) | 6.7021E-01 | 3.6116E-02 | Not significant |
| 2272 | GCST90005097 | rfMRI connectivity (ICA100 edge 244) | 6.7039E-01 | 3.6132E-02 | Not significant |
| 2273 | GCST90003843 | wg rh intensity-contrast paracentral | 6.7076E-01 | 3.6148E-02 | Not significant |
| 2274 | GCST90004800 | rfMRI connectivity (ICA25 edge 157) | 6.7089E-01 | 3.6164E-02 | Not significant |
| 2275 | GCST90004399 | IDP dMRI ProbtrackX ICVF str r | 6.7135E-01 | 3.6180E-02 | Not significant |
| 2276 | GCST90004424 | IDP dMRI TBSS OD Anterior corona radiata R | 6.7167E-01 | 3.6196E-02 | Not significant |
| 2277 | GCST90002842 | BA-exvivo lh volume BA44 | 6.7174E-01 | 3.6212E-02 | Not significant |
| 2278 | GCST90005490 | rfMRI connectivity (ICA100 edge 637) | 6.7183E-01 | 3.6228E-02 | Not significant |
| 2279 | GCST90003597 | aparc-DKTatlas rh thickness superiorfrontal | 6.7236E-01 | 3.6244E-02 | Not significant |
| 2280 | GCST90002629 | aseg lh volume choroid-plexus | 6.7248E-01 | 3.6260E-02 | Not significant |
| 2281 | GCST90002454 | IDP T1 FAST ROIs R insular cortex | 6.7251E-01 | 3.6275E-02 | Not significant |
| 2282 | GCST90006165 | rfMRI connectivity (ICA100 edge 1312) | 6.7255E-01 | 3.6291E-02 | Not significant |
| 2283 | GCST90003249 | aparc-DKTatlas lh area paracentral | 6.7297E-01 | 3.6307E-02 | Not significant |
| 2284 | GCST90002915 | aparc-DKTatlas rh volume precentral | 6.7322E-01 | 3.6323E-02 | Not significant |
| 2285 | GCST90005709 | rfMRI connectivity (ICA100 edge 856) | 6.7382E-01 | 3.6339E-02 | Not significant |
| 2286 | GCST90004988 | rfMRI connectivity (ICA100 edge 135) | 6.7433E-01 | 3.6355E-02 | Not significant |
| 2287 | GCST90004835 | rfMRI connectivity (ICA25 edge 192) | 6.7450E-01 | 3.6371E-02 | Not significant |
| 2288 | GCST90004625 | rfMRI amplitudes (ICA100 node 37) | 6.7504E-01 | 3.6387E-02 | Not significant |
| 2289 | GCST90006340 | rfMRI connectivity ICA-features 2 | 6.7533E-01 | 3.6403E-02 | Not significant |
| 2290 | GCST90005272 | rfMRI connectivity (ICA100 edge 419) | 6.7545E-01 | 3.6419E-02 | Not significant |
| 2291 | GCST90005213 | rfMRI connectivity (ICA100 edge 360) | 6.7555E-01 | 3.6434E-02 | Not significant |
| 2292 | GCST90004770 | rfMRI connectivity (ICA25 edge 127) | 6.7572E-01 | 3.6450E-02 | Not significant |
| 2293 | GCST90005024 | rfMRI connectivity (ICA100 edge 171) | 6.7597E-01 | 3.6466E-02 | Not significant |
| 2294 | GCST90004247 | IDP dMRI ProbtrackX L1 ar r | 6.7609E-01 | 3.6482E-02 | Not significant |
| 2295 | GCST90003807 | wg lh intensity-contrast parahippocampal | 6.7649E-01 | 3.6498E-02 | Not significant |
| 2296 | GCST90005669 | rfMRI connectivity (ICA100 edge 816) | 6.7650E-01 | 3.6514E-02 | Not significant |
| 2297 | GCST90006109 | rfMRI connectivity (ICA100 edge 1256) | 6.7725E-01 | 3.6530E-02 | Not significant |
| 2298 | GCST90003152 | aparc-pial lh area lateralorbitofrontal | 6.7749E-01 | 3.6546E-02 | Not significant |
| 2299 | GCST90002770 | aparc-Desikan lh volume caudalanteriorcingulate | 6.7895E-01 | 3.6562E-02 | Not significant |
| 2300 | GCST90003733 | aparc-a2009s rh thickness S-oc-middle+Lunatus | 6.7915E-01 | 3.6578E-02 | Not significant |
| 2301 | GCST90003008 | aparc-a2009s rh volume G-cingul-Post-ventral | 6.7983E-01 | 3.6594E-02 | Not significant |
| 2302 | GCST90003375 | aparc-a2009s rh area G+S-transv-frontopol | 6.8003E-01 | 3.6609E-02 | Not significant |
| 2303 | GCST90004796 | rfMRI connectivity (ICA25 edge 153) | 6.8029E-01 | 3.6625E-02 | Not significant |
| 2304 | GCST90003687 | aparc-a2009s rh thickness G-cuneus | 6.8045E-01 | 3.6641E-02 | Not significant |
| 2305 | GCST90005539 | rfMRI connectivity (ICA100 edge 686) | 6.8058E-01 | 3.6657E-02 | Not significant |
| 2306 | GCST90004101 | IDP dMRI TBSS L1 Posterior corona radiata R | 6.8105E-01 | 3.6673E-02 | Not significant |
| 2307 | GCST90002754 | ThalamNuclei rh volume CL | 6.8106E-01 | 3.6689E-02 | Not significant |
| 2308 | GCST90003032 | aparc-a2009s rh volume G-temp-sup-Lateral | 6.8145E-01 | 3.6705E-02 | Not significant |
| 2309 | GCST90004946 | rfMRI connectivity (ICA100 edge 93) | 6.8204E-01 | 3.6721E-02 | Not significant |
| 2310 | GCST90003360 | aparc-a2009s lh area S-orbital-H-Shaped | 6.8249E-01 | 3.6737E-02 | Not significant |
| 2311 | GCST90004217 | IDP dMRI TBSS L3 Tapetum R | 6.8278E-01 | 3.6753E-02 | Not significant |
| 2312 | GCST90004533 | IDP dMRI ProbtrackX ISOVF cst l | 6.8293E-01 | 3.6768E-02 | Not significant |
| 2313 | GCST90005500 | rfMRI connectivity (ICA100 edge 647) | 6.8296E-01 | 3.6784E-02 | Not significant |
| 2314 | GCST90005029 | rfMRI connectivity (ICA100 edge 176) | 6.8300E-01 | 3.6800E-02 | Not significant |
| 2315 | GCST90003379 | aparc-a2009s rh area G-cingul-Post-dorsal | 6.8310E-01 | 3.6816E-02 | Not significant |
| 2316 | GCST90003770 | aseg lh intensity Putamen | 6.8328E-01 | 3.6832E-02 | Not significant |
| 2317 | GCST90006053 | rfMRI connectivity (ICA100 edge 1200) | 6.8348E-01 | 3.6848E-02 | Not significant |
| 2318 | GCST90006026 | rfMRI connectivity (ICA100 edge 1173) | 6.8363E-01 | 3.6864E-02 | Not significant |
| 2319 | GCST90006237 | rfMRI connectivity (ICA100 edge 1384) | 6.8403E-01 | 3.6880E-02 | Not significant |
| 2320 | GCST90005037 | rfMRI connectivity (ICA100 edge 184) | 6.8436E-01 | 3.6896E-02 | Not significant |
| 2321 | GCST90005299 | rfMRI connectivity (ICA100 edge 446) | 6.8459E-01 | 3.6912E-02 | Not significant |
| 2322 | GCST90004227 | IDP dMRI ProbtrackX MD cst l | 6.8480E-01 | 3.6927E-02 | Not significant |
| 2323 | GCST90003528 | BA-exvivo rh thickness BA2 | 6.8508E-01 | 3.6943E-02 | Not significant |
| 2324 | GCST90004694 | rfMRI connectivity (ICA25 edge 51) | 6.8524E-01 | 3.6959E-02 | Not significant |
| 2325 | GCST90005983 | rfMRI connectivity (ICA100 edge 1130) | 6.8525E-01 | 3.6975E-02 | Not significant |
| 2326 | GCST90002903 | aparc-DKTatlas rh volume lateralorbitofrontal | 6.8544E-01 | 3.6991E-02 | Not significant |
| 2327 | GCST90004801 | rfMRI connectivity (ICA25 edge 158) | 6.8549E-01 | 3.7007E-02 | Not significant |
| 2328 | GCST90004509 | IDP dMRI TBSS ISOVF External capsule R | 6.8550E-01 | 3.7023E-02 | Not significant |
| 2329 | GCST90004074 | IDP dMRI TBSS MD Tapetum L | 6.8568E-01 | 3.7039E-02 | Not significant |
| 2330 | GCST90004751 | rfMRI connectivity (ICA25 edge 108) | 6.8587E-01 | 3.7055E-02 | Not significant |
| 2331 | GCST90005747 | rfMRI connectivity (ICA100 edge 894) | 6.8603E-01 | 3.7071E-02 | Not significant |
| 2332 | GCST90003709 | aparc-a2009s rh thickness G-temp-sup-G-T-transv | 6.8608E-01 | 3.7087E-02 | Not significant |
| 2333 | GCST90003437 | aparc-a2009s rh area S-postcentral | 6.8623E-01 | 3.7102E-02 | Not significant |
| 2334 | GCST90006105 | rfMRI connectivity (ICA100 edge 1252) | 6.8643E-01 | 3.7118E-02 | Not significant |
| 2335 | GCST90003259 | aparc-DKTatlas lh area rostralmiddlefrontal | 6.8782E-01 | 3.7134E-02 | Not significant |
| 2336 | GCST90005674 | rfMRI connectivity (ICA100 edge 821) | 6.8825E-01 | 3.7150E-02 | Not significant |
| 2337 | GCST90005100 | rfMRI connectivity (ICA100 edge 247) | 6.8832E-01 | 3.7166E-02 | Not significant |
| 2338 | GCST90005275 | rfMRI connectivity (ICA100 edge 422) | 6.8841E-01 | 3.7182E-02 | Not significant |
| 2339 | GCST90002742 | ThalamNuclei rh volume CM | 6.8848E-01 | 3.7198E-02 | Not significant |
| 2340 | GCST90004994 | rfMRI connectivity (ICA100 edge 141) | 6.8896E-01 | 3.7214E-02 | Not significant |
| 2341 | GCST90004246 | IDP dMRI ProbtrackX L1 ar l | 6.8912E-01 | 3.7230E-02 | Not significant |
| 2342 | GCST90005753 | rfMRI connectivity (ICA100 edge 900) | 6.8917E-01 | 3.7246E-02 | Not significant |
| 2343 | GCST90003673 | aparc-a2009s lh thickness S-subparietal | 6.8943E-01 | 3.7261E-02 | Not significant |
| 2344 | GCST90005608 | rfMRI connectivity (ICA100 edge 755) | 6.8950E-01 | 3.7277E-02 | Not significant |
| 2345 | GCST90005196 | rfMRI connectivity (ICA100 edge 343) | 6.8962E-01 | 3.7293E-02 | Not significant |
| 2346 | GCST90003592 | aparc-DKTatlas rh thickness posteriorcingulate | 6.8996E-01 | 3.7309E-02 | Not significant |
| 2347 | GCST90005421 | rfMRI connectivity (ICA100 edge 568) | 6.8998E-01 | 3.7325E-02 | Not significant |
| 2348 | GCST90004561 | IDP tfMRI 90th-percentile BOLD faces-shapes | 6.9000E-01 | 3.7341E-02 | Not significant |
| 2349 | GCST90005689 | rfMRI connectivity (ICA100 edge 836) | 6.9011E-01 | 3.7357E-02 | Not significant |
| 2350 | GCST90005971 | rfMRI connectivity (ICA100 edge 1118) | 6.9012E-01 | 3.7373E-02 | Not significant |
| 2351 | GCST90002725 | ThalamNuclei lh volume CeM | 6.9015E-01 | 3.7389E-02 | Not significant |
| 2352 | GCST90006195 | rfMRI connectivity (ICA100 edge 1342) | 6.9022E-01 | 3.7405E-02 | Not significant |
| 2353 | GCST90004977 | rfMRI connectivity (ICA100 edge 124) | 6.9065E-01 | 3.7420E-02 | Not significant |
| 2354 | GCST90005026 | rfMRI connectivity (ICA100 edge 173) | 6.9073E-01 | 3.7436E-02 | Not significant |
| 2355 | GCST90005898 | rfMRI connectivity (ICA100 edge 1045) | 6.9077E-01 | 3.7452E-02 | Not significant |
| 2356 | GCST90004085 | IDP dMRI TBSS L1 Inferior cerebellar peduncle R | 6.9091E-01 | 3.7468E-02 | Not significant |
| 2357 | GCST90002848 | BA-exvivo lh volume entorhinal | 6.9111E-01 | 3.7484E-02 | Not significant |
| 2358 | GCST90004735 | rfMRI connectivity (ICA25 edge 92) | 6.9113E-01 | 3.7500E-02 | Not significant |
| 2359 | GCST90004620 | rfMRI amplitudes (ICA100 node 32) | 6.9116E-01 | 3.7516E-02 | Not significant |
| 2360 | GCST90004970 | rfMRI connectivity (ICA100 edge 117) | 6.9119E-01 | 3.7532E-02 | Not significant |
| 2361 | GCST90003987 | IDP dMRI TBSS MO Cingulum cingulate gyrus L | 6.9132E-01 | 3.7548E-02 | Not significant |
| 2362 | GCST90006249 | rfMRI connectivity (ICA100 edge 1396) | 6.9144E-01 | 3.7564E-02 | Not significant |
| 2363 | GCST90005340 | rfMRI connectivity (ICA100 edge 487) | 6.9144E-01 | 3.7580E-02 | Not significant |
| 2364 | GCST90002837 | BA-exvivo lh volume BA3a | 6.9160E-01 | 3.7595E-02 | Not significant |
| 2365 | GCST90003168 | aparc-pial lh area superiorfrontal | 6.9171E-01 | 3.7611E-02 | Not significant |
| 2366 | GCST90004476 | IDP dMRI ProbtrackX OD unc r | 6.9181E-01 | 3.7627E-02 | Not significant |
| 2367 | GCST90005793 | rfMRI connectivity (ICA100 edge 940) | 6.9207E-01 | 3.7643E-02 | Not significant |
| 2368 | GCST90002913 | aparc-DKTatlas rh volume postcentral | 6.9239E-01 | 3.7659E-02 | Not significant |
| 2369 | GCST90005696 | rfMRI connectivity (ICA100 edge 843) | 6.9267E-01 | 3.7675E-02 | Not significant |
| 2370 | GCST90003995 | IDP dMRI TBSS MO Superior fronto-occipital fasciculus L | 6.9269E-01 | 3.7691E-02 | Not significant |
| 2371 | GCST90006241 | rfMRI connectivity (ICA100 edge 1388) | 6.9287E-01 | 3.7707E-02 | Not significant |
| 2372 | GCST90004242 | IDP dMRI ProbtrackX MD str l | 6.9302E-01 | 3.7723E-02 | Not significant |
| 2373 | GCST90003320 | aparc-a2009s lh area G-orbital | 6.9303E-01 | 3.7739E-02 | Not significant |
| 2374 | GCST90002813 | aparc-Desikan rh volume lingual | 6.9320E-01 | 3.7754E-02 | Not significant |
| 2375 | GCST90002931 | aparc-a2009s lh volume G+S-cingul-Mid-Ant | 6.9322E-01 | 3.7770E-02 | Not significant |
| 2376 | GCST90003984 | IDP dMRI TBSS MO External capsule R | 6.9339E-01 | 3.7786E-02 | Not significant |
| 2377 | GCST90003264 | aparc-DKTatlas lh area transversetemporal | 6.9344E-01 | 3.7802E-02 | Not significant |
| 2378 | GCST90004877 | rfMRI connectivity (ICA100 edge 24) | 6.9347E-01 | 3.7818E-02 | Not significant |
| 2379 | GCST90006096 | rfMRI connectivity (ICA100 edge 1243) | 6.9358E-01 | 3.7834E-02 | Not significant |
| 2380 | GCST90002735 | ThalamNuclei lh volume LP | 6.9358E-01 | 3.7850E-02 | Not significant |
| 2381 | GCST90003212 | BA-exvivo lh area BA4p | 6.9393E-01 | 3.7866E-02 | Not significant |
| 2382 | GCST90003505 | aparc-Desikan rh thickness rostralmiddlefrontal | 6.9400E-01 | 3.7882E-02 | Not significant |
| 2383 | GCST90005958 | rfMRI connectivity (ICA100 edge 1105) | 6.9412E-01 | 3.7898E-02 | Not significant |
| 2384 | GCST90004741 | rfMRI connectivity (ICA25 edge 98) | 6.9448E-01 | 3.7913E-02 | Not significant |
| 2385 | GCST90003205 | aparc-pial rh area frontalpole | 6.9454E-01 | 3.7929E-02 | Not significant |
| 2386 | GCST90003851 | wg rh intensity-contrast precuneus | 6.9529E-01 | 3.7945E-02 | Not significant |
| 2387 | GCST90003979 | IDP dMRI TBSS MO Posterior corona radiata L | 6.9531E-01 | 3.7961E-02 | Not significant |
| 2388 | GCST90005522 | rfMRI connectivity (ICA100 edge 669) | 6.9571E-01 | 3.7977E-02 | Not significant |
| 2389 | GCST90003634 | aparc-a2009s lh thickness G-subcallosal | 6.9642E-01 | 3.7993E-02 | Not significant |
| 2390 | GCST90004518 | IDP dMRI TBSS ISOVF Superior longitudinal fasciculus L | 6.9655E-01 | 3.8009E-02 | Not significant |
| 2391 | GCST90005890 | rfMRI connectivity (ICA100 edge 1037) | 6.9681E-01 | 3.8025E-02 | Not significant |
| 2392 | GCST90003727 | aparc-a2009s rh thickness S-collat-transv-post | 6.9715E-01 | 3.8041E-02 | Not significant |
| 2393 | GCST90004738 | rfMRI connectivity (ICA25 edge 95) | 6.9725E-01 | 3.8057E-02 | Not significant |
| 2394 | GCST90004211 | IDP dMRI TBSS L3 Superior longitudinal fasciculus R | 6.9770E-01 | 3.8073E-02 | Not significant |
| 2395 | GCST90004576 | rfMRI amplitudes (ICA25 node 9) | 6.9812E-01 | 3.8088E-02 | Not significant |
| 2396 | GCST90003010 | aparc-a2009s rh volume G-front-inf-Opercular | 6.9814E-01 | 3.8104E-02 | Not significant |
| 2397 | GCST90004194 | IDP dMRI TBSS L3 Anterior corona radiata L | 6.9818E-01 | 3.8120E-02 | Not significant |
| 2398 | GCST90002953 | aparc-a2009s lh volume G-precentral | 6.9823E-01 | 3.8136E-02 | Not significant |
| 2399 | GCST90004381 | IDP dMRI ProbtrackX ICVF cgh l | 6.9870E-01 | 3.8152E-02 | Not significant |
| 2400 | GCST90003114 | aparc-Desikan rh area inferiorparietal | 6.9885E-01 | 3.8168E-02 | Not significant |
| 2401 | GCST90002491 | IDP T1 FAST ROIs L angular gyrus | 6.9895E-01 | 3.8184E-02 | Not significant |
| 2402 | GCST90002609 | aseg global volume CC-Central | 6.9923E-01 | 3.8200E-02 | Not significant |
| 2403 | GCST90005826 | rfMRI connectivity (ICA100 edge 973) | 6.9923E-01 | 3.8216E-02 | Not significant |
| 2404 | GCST90003579 | aparc-DKTatlas rh thickness isthmuscingulate | 6.9927E-01 | 3.8232E-02 | Not significant |
| 2405 | GCST90005391 | rfMRI connectivity (ICA100 edge 538) | 6.9949E-01 | 3.8247E-02 | Not significant |
| 2406 | GCST90005022 | rfMRI connectivity (ICA100 edge 169) | 6.9978E-01 | 3.8263E-02 | Not significant |
| 2407 | GCST90005589 | rfMRI connectivity (ICA100 edge 736) | 7.0014E-01 | 3.8279E-02 | Not significant |
| 2408 | GCST90006232 | rfMRI connectivity (ICA100 edge 1379) | 7.0232E-01 | 3.8295E-02 | Not significant |
| 2409 | GCST90004956 | rfMRI connectivity (ICA100 edge 103) | 7.0242E-01 | 3.8311E-02 | Not significant |
| 2410 | GCST90003187 | aparc-pial rh area medialorbitofrontal | 7.0291E-01 | 3.8327E-02 | Not significant |
| 2411 | GCST90006084 | rfMRI connectivity (ICA100 edge 1231) | 7.0303E-01 | 3.8343E-02 | Not significant |
| 2412 | GCST90003122 | aparc-Desikan rh area parahippocampal | 7.0312E-01 | 3.8359E-02 | Not significant |
| 2413 | GCST90003445 | aparc-Desikan lh thickness GlobalMeanThickness | 7.0351E-01 | 3.8375E-02 | Not significant |
| 2414 | GCST90003155 | aparc-pial lh area middletemporal | 7.0361E-01 | 3.8391E-02 | Not significant |
| 2415 | GCST90005919 | rfMRI connectivity (ICA100 edge 1066) | 7.0470E-01 | 3.8406E-02 | Not significant |
| 2416 | GCST90005672 | rfMRI connectivity (ICA100 edge 819) | 7.0471E-01 | 3.8422E-02 | Not significant |
| 2417 | GCST90003347 | aparc-a2009s lh area S-collat-transv-post | 7.0479E-01 | 3.8438E-02 | Not significant |
| 2418 | GCST90003970 | IDP dMRI TBSS MO Posterior limb of internal capsule R | 7.0484E-01 | 3.8454E-02 | Not significant |
| 2419 | GCST90005777 | rfMRI connectivity (ICA100 edge 924) | 7.0519E-01 | 3.8470E-02 | Not significant |
| 2420 | GCST90005269 | rfMRI connectivity (ICA100 edge 416) | 7.0528E-01 | 3.8486E-02 | Not significant |
| 2421 | GCST90003235 | aparc-DKTatlas lh area caudalanteriorcingulate | 7.0544E-01 | 3.8502E-02 | Not significant |
| 2422 | GCST90003106 | aparc-Desikan lh area insula | 7.0558E-01 | 3.8518E-02 | Not significant |
| 2423 | GCST90003282 | aparc-DKTatlas rh area parsorbitalis | 7.0562E-01 | 3.8534E-02 | Not significant |
| 2424 | GCST90003113 | aparc-Desikan rh area fusiform | 7.0589E-01 | 3.8550E-02 | Not significant |
| 2425 | GCST90005191 | rfMRI connectivity (ICA100 edge 338) | 7.0590E-01 | 3.8566E-02 | Not significant |
| 2426 | GCST90006103 | rfMRI connectivity (ICA100 edge 1250) | 7.0632E-01 | 3.8581E-02 | Not significant |
| 2427 | GCST90005920 | rfMRI connectivity (ICA100 edge 1067) | 7.0634E-01 | 3.8597E-02 | Not significant |
| 2428 | GCST90006346 | QC T1-to-standard nonlinear alignment discrepancy | 7.0649E-01 | 3.8613E-02 | Not significant |
| 2429 | GCST90003057 | aparc-a2009s rh volume S-occipital-ant | 7.0666E-01 | 3.8629E-02 | Not significant |
| 2430 | GCST90003875 | IDP SWI T2star left accumbens | 7.0689E-01 | 3.8645E-02 | Not significant |
| 2431 | GCST90004087 | IDP dMRI TBSS L1 Superior cerebellar peduncle R | 7.0705E-01 | 3.8661E-02 | Not significant |
| 2432 | GCST90002912 | aparc-DKTatlas rh volume pericalcarine | 7.0811E-01 | 3.8677E-02 | Not significant |
| 2433 | GCST90003633 | aparc-a2009s lh thickness G-rectus | 7.0818E-01 | 3.8693E-02 | Not significant |
| 2434 | GCST90006127 | rfMRI connectivity (ICA100 edge 1274) | 7.0819E-01 | 3.8709E-02 | Not significant |
| 2435 | GCST90003726 | aparc-a2009s rh thickness S-collat-transv-ant | 7.0834E-01 | 3.8725E-02 | Not significant |
| 2436 | GCST90003674 | aparc-a2009s lh thickness S-temporal-inf | 7.0852E-01 | 3.8740E-02 | Not significant |
| 2437 | GCST90003352 | aparc-a2009s lh area S-intrapariet+P-trans | 7.0887E-01 | 3.8756E-02 | Not significant |
| 2438 | GCST90003962 | IDP dMRI TBSS MO Inferior cerebellar peduncle R | 7.0898E-01 | 3.8772E-02 | Not significant |
| 2439 | GCST90002852 | BA-exvivo rh volume BA3b | 7.0913E-01 | 3.8788E-02 | Not significant |
| 2440 | GCST90005409 | rfMRI connectivity (ICA100 edge 556) | 7.0920E-01 | 3.8804E-02 | Not significant |
| 2441 | GCST90002879 | aparc-DKTatlas lh volume parsorbitalis | 7.0987E-01 | 3.8820E-02 | Not significant |
| 2442 | GCST90005027 | rfMRI connectivity (ICA100 edge 174) | 7.1018E-01 | 3.8836E-02 | Not significant |
| 2443 | GCST90002641 | aseg rh volume Hippocampus | 7.1033E-01 | 3.8852E-02 | Not significant |
| 2444 | GCST90006166 | rfMRI connectivity (ICA100 edge 1313) | 7.1047E-01 | 3.8868E-02 | Not significant |
| 2445 | GCST90006094 | rfMRI connectivity (ICA100 edge 1241) | 7.1102E-01 | 3.8884E-02 | Not significant |
| 2446 | GCST90002930 | aparc-a2009s lh volume G+S-cingul-Ant | 7.1108E-01 | 3.8899E-02 | Not significant |
| 2447 | GCST90006277 | rfMRI connectivity (ICA100 edge 1424) | 7.1126E-01 | 3.8915E-02 | Not significant |
| 2448 | GCST90003840 | wg rh intensity-contrast medialorbitofrontal | 7.1158E-01 | 3.8931E-02 | Not significant |
| 2449 | GCST90002450 | IDP T1 FIRST brain stem+4th ventricle volume | 7.1194E-01 | 3.8947E-02 | Not significant |
| 2450 | GCST90005223 | rfMRI connectivity (ICA100 edge 370) | 7.1263E-01 | 3.8963E-02 | Not significant |
| 2451 | GCST90004535 | IDP dMRI ProbtrackX ISOVF fma | 7.1293E-01 | 3.8979E-02 | Not significant |
| 2452 | GCST90004363 | IDP dMRI TBSS ICVF Cingulum hippocampus R | 7.1296E-01 | 3.8995E-02 | Not significant |
| 2453 | GCST90005487 | rfMRI connectivity (ICA100 edge 634) | 7.1311E-01 | 3.9011E-02 | Not significant |
| 2454 | GCST90006005 | rfMRI connectivity (ICA100 edge 1152) | 7.1328E-01 | 3.9027E-02 | Not significant |
| 2455 | GCST90003434 | aparc-a2009s rh area S-orbital-H-Shaped | 7.1357E-01 | 3.9043E-02 | Not significant |
| 2456 | GCST90004543 | IDP dMRI ProbtrackX ISOVF ml r | 7.1374E-01 | 3.9059E-02 | Not significant |
| 2457 | GCST90005918 | rfMRI connectivity (ICA100 edge 1065) | 7.1420E-01 | 3.9074E-02 | Not significant |
| 2458 | GCST90003330 | aparc-a2009s lh area G-temp-sup-Lateral | 7.1431E-01 | 3.9090E-02 | Not significant |
| 2459 | GCST90004541 | IDP dMRI ProbtrackX ISOVF mcp | 7.1434E-01 | 3.9106E-02 | Not significant |
| 2460 | GCST90002839 | BA-exvivo lh volume BA4a | 7.1447E-01 | 3.9122E-02 | Not significant |
| 2461 | GCST90005680 | rfMRI connectivity (ICA100 edge 827) | 7.1490E-01 | 3.9138E-02 | Not significant |
| 2462 | GCST90003601 | aparc-DKTatlas rh thickness transversetemporal | 7.1501E-01 | 3.9154E-02 | Not significant |
| 2463 | GCST90003493 | aparc-Desikan rh thickness middletemporal | 7.1503E-01 | 3.9170E-02 | Not significant |
| 2464 | GCST90004454 | IDP dMRI ProbtrackX OD cgc l | 7.1611E-01 | 3.9186E-02 | Not significant |
| 2465 | GCST90002981 | aparc-a2009s lh volume S-oc-middle+Lunatus | 7.1634E-01 | 3.9202E-02 | Not significant |
| 2466 | GCST90004812 | rfMRI connectivity (ICA25 edge 169) | 7.1647E-01 | 3.9218E-02 | Not significant |
| 2467 | GCST90002982 | aparc-a2009s lh volume S-oc-sup+transversal | 7.1682E-01 | 3.9233E-02 | Not significant |
| 2468 | GCST90003878 | IDP dMRI TBSS FA Pontine crossing tract | 7.1717E-01 | 3.9249E-02 | Not significant |
| 2469 | GCST90005690 | rfMRI connectivity (ICA100 edge 837) | 7.1719E-01 | 3.9265E-02 | Not significant |
| 2470 | GCST90005428 | rfMRI connectivity (ICA100 edge 575) | 7.1740E-01 | 3.9281E-02 | Not significant |
| 2471 | GCST90002600 | aseg global volume 4th-Ventricle | 7.1752E-01 | 3.9297E-02 | Not significant |
| 2472 | GCST90006141 | rfMRI connectivity (ICA100 edge 1288) | 7.1764E-01 | 3.9313E-02 | Not significant |
| 2473 | GCST90004597 | rfMRI amplitudes (ICA100 node 9) | 7.1802E-01 | 3.9329E-02 | Not significant |
| 2474 | GCST90002887 | aparc-DKTatlas lh volume rostralmiddlefrontal | 7.1805E-01 | 3.9345E-02 | Not significant |
| 2475 | GCST90005752 | rfMRI connectivity (ICA100 edge 899) | 7.1807E-01 | 3.9361E-02 | Not significant |
| 2476 | GCST90006089 | rfMRI connectivity (ICA100 edge 1236) | 7.1836E-01 | 3.9377E-02 | Not significant |
| 2477 | GCST90002975 | aparc-a2009s lh volume S-collat-transv-post | 7.1837E-01 | 3.9392E-02 | Not significant |
| 2478 | GCST90004461 | IDP dMRI ProbtrackX OD fmi | 7.1846E-01 | 3.9408E-02 | Not significant |
| 2479 | GCST90004878 | rfMRI connectivity (ICA100 edge 25) | 7.1911E-01 | 3.9424E-02 | Not significant |
| 2480 | GCST90003880 | IDP dMRI TBSS FA Body of corpus callosum | 7.1928E-01 | 3.9440E-02 | Not significant |
| 2481 | GCST90002623 | aseg lh volume Pallidum | 7.1930E-01 | 3.9456E-02 | Not significant |
| 2482 | GCST90003918 | IDP dMRI TBSS FA Superior longitudinal fasciculus L | 7.1995E-01 | 3.9472E-02 | Not significant |
| 2483 | GCST90006285 | rfMRI connectivity (ICA100 edge 1432) | 7.2031E-01 | 3.9488E-02 | Not significant |
| 2484 | GCST90002833 | aparc-Desikan rh volume transversetemporal | 7.2052E-01 | 3.9504E-02 | Not significant |
| 2485 | GCST90003189 | aparc-pial rh area parahippocampal | 7.2087E-01 | 3.9520E-02 | Not significant |
| 2486 | GCST90004182 | IDP dMRI TBSS L3 Inferior cerebellar peduncle L | 7.2088E-01 | 3.9536E-02 | Not significant |
| 2487 | GCST90003644 | aparc-a2009s lh thickness Pole-occipital | 7.2102E-01 | 3.9552E-02 | Not significant |
| 2488 | GCST90004781 | rfMRI connectivity (ICA25 edge 138) | 7.2126E-01 | 3.9567E-02 | Not significant |
| 2489 | GCST90004041 | IDP dMRI TBSS MD Cerebral peduncle R | 7.2131E-01 | 3.9583E-02 | Not significant |
| 2490 | GCST90003715 | aparc-a2009s rh thickness Lat-Fis-ant-Horizont | 7.2132E-01 | 3.9599E-02 | Not significant |
| 2491 | GCST90003357 | aparc-a2009s lh area S-oc-temp-med+Lingual | 7.2136E-01 | 3.9615E-02 | Not significant |
| 2492 | GCST90002653 | AmygNuclei lh volume Medial-nucleus | 7.2156E-01 | 3.9631E-02 | Not significant |
| 2493 | GCST90002492 | IDP T1 FAST ROIs R angular gyrus | 7.2175E-01 | 3.9647E-02 | Not significant |
| 2494 | GCST90003469 | aparc-Desikan lh thickness precuneus | 7.2257E-01 | 3.9663E-02 | Not significant |
| 2495 | GCST90004931 | rfMRI connectivity (ICA100 edge 78) | 7.2271E-01 | 3.9679E-02 | Not significant |
| 2496 | GCST90004960 | rfMRI connectivity (ICA100 edge 107) | 7.2313E-01 | 3.9695E-02 | Not significant |
| 2497 | GCST90005215 | rfMRI connectivity (ICA100 edge 362) | 7.2333E-01 | 3.9711E-02 | Not significant |
| 2498 | GCST90002976 | aparc-a2009s lh volume S-front-inf | 7.2386E-01 | 3.9726E-02 | Not significant |
| 2499 | GCST90003315 | aparc-a2009s lh area G-occipital-middle | 7.2436E-01 | 3.9742E-02 | Not significant |
| 2500 | GCST90002851 | BA-exvivo rh volume BA3a | 7.2442E-01 | 3.9758E-02 | Not significant |
| 2501 | GCST90003656 | aparc-a2009s lh thickness S-front-sup | 7.2452E-01 | 3.9774E-02 | Not significant |
| 2502 | GCST90002748 | ThalamNuclei rh volume MDl | 7.2461E-01 | 3.9790E-02 | Not significant |
| 2503 | GCST90002549 | IDP T1 FAST ROIs L caudate | 7.2475E-01 | 3.9806E-02 | Not significant |
| 2504 | GCST90006025 | rfMRI connectivity (ICA100 edge 1172) | 7.2488E-01 | 3.9822E-02 | Not significant |
| 2505 | GCST90003935 | IDP dMRI ProbtrackX FA fma | 7.2490E-01 | 3.9838E-02 | Not significant |
| 2506 | GCST90002892 | aparc-DKTatlas lh volume transversetemporal | 7.2568E-01 | 3.9854E-02 | Not significant |
| 2507 | GCST90002891 | aparc-DKTatlas lh volume supramarginal | 7.2569E-01 | 3.9870E-02 | Not significant |
| 2508 | GCST90003458 | aparc-Desikan lh thickness medialorbitofrontal | 7.2573E-01 | 3.9885E-02 | Not significant |
| 2509 | GCST90003605 | aparc-a2009s lh thickness G+S-paracentral | 7.2599E-01 | 3.9901E-02 | Not significant |
| 2510 | GCST90004560 | IDP tfMRI median BOLD faces-shapes | 7.2669E-01 | 3.9917E-02 | Not significant |
| 2511 | GCST90002527 | IDP T1 FAST ROIs L temp occ fusif cortex | 7.2704E-01 | 3.9933E-02 | Not significant |
| 2512 | GCST90003442 | aparc-a2009s rh area S-temporal-inf | 7.2781E-01 | 3.9949E-02 | Not significant |
| 2513 | GCST90005130 | rfMRI connectivity (ICA100 edge 277) | 7.2788E-01 | 3.9965E-02 | Not significant |
| 2514 | GCST90003388 | aparc-a2009s rh area G-insular-short | 7.2809E-01 | 3.9981E-02 | Not significant |
| 2515 | GCST90005851 | rfMRI connectivity (ICA100 edge 998) | 7.2816E-01 | 3.9997E-02 | Not significant |
| 2516 | GCST90003795 | wg lh intensity-contrast caudalmiddlefrontal | 7.2819E-01 | 4.0013E-02 | Not significant |
| 2517 | GCST90003253 | aparc-DKTatlas lh area pericalcarine | 7.2859E-01 | 4.0029E-02 | Not significant |
| 2518 | GCST90004602 | rfMRI amplitudes (ICA100 node 14) | 7.2880E-01 | 4.0045E-02 | Not significant |
| 2519 | GCST90004013 | IDP dMRI ProbtrackX MO ifo r | 7.2927E-01 | 4.0060E-02 | Not significant |
| 2520 | GCST90003560 | aparc-DKTatlas lh thickness postcentral | 7.2935E-01 | 4.0076E-02 | Not significant |
| 2521 | GCST90003637 | aparc-a2009s lh thickness G-temp-sup-Plan-polar | 7.2980E-01 | 4.0092E-02 | Not significant |
| 2522 | GCST90005636 | rfMRI connectivity (ICA100 edge 783) | 7.3011E-01 | 4.0108E-02 | Not significant |
| 2523 | GCST90002553 | IDP T1 FAST ROIs L pallidum | 7.3080E-01 | 4.0124E-02 | Not significant |
| 2524 | GCST90004913 | rfMRI connectivity (ICA100 edge 60) | 7.3090E-01 | 4.0140E-02 | Not significant |
| 2525 | GCST90004645 | rfMRI connectivity (ICA25 edge 2) | 7.3096E-01 | 4.0156E-02 | Not significant |
| 2526 | GCST90003756 | aseg global intensity WM-hypointensities | 7.3116E-01 | 4.0172E-02 | Not significant |
| 2527 | GCST90004349 | IDP dMRI TBSS ICVF Anterior corona radiata R | 7.3128E-01 | 4.0188E-02 | Not significant |
| 2528 | GCST90006187 | rfMRI connectivity (ICA100 edge 1334) | 7.3135E-01 | 4.0204E-02 | Not significant |
| 2529 | GCST90005585 | rfMRI connectivity (ICA100 edge 732) | 7.3161E-01 | 4.0219E-02 | Not significant |
| 2530 | GCST90005836 | rfMRI connectivity (ICA100 edge 983) | 7.3166E-01 | 4.0235E-02 | Not significant |
| 2531 | GCST90002669 | HippSubfield lh volume subiculum-body | 7.3169E-01 | 4.0251E-02 | Not significant |
| 2532 | GCST90006139 | rfMRI connectivity (ICA100 edge 1286) | 7.3230E-01 | 4.0267E-02 | Not significant |
| 2533 | GCST90002542 | IDP T1 FAST ROIs R planum temporale | 7.3257E-01 | 4.0283E-02 | Not significant |
| 2534 | GCST90005477 | rfMRI connectivity (ICA100 edge 624) | 7.3304E-01 | 4.0299E-02 | Not significant |
| 2535 | GCST90005618 | rfMRI connectivity (ICA100 edge 765) | 7.3305E-01 | 4.0315E-02 | Not significant |
| 2536 | GCST90004947 | rfMRI connectivity (ICA100 edge 94) | 7.3318E-01 | 4.0331E-02 | Not significant |
| 2537 | GCST90003896 | IDP dMRI TBSS FA Posterior limb of internal capsule L | 7.3347E-01 | 4.0347E-02 | Not significant |
| 2538 | GCST90003542 | aparc-DKTatlas lh thickness caudalmiddlefrontal | 7.3370E-01 | 4.0363E-02 | Not significant |
| 2539 | GCST90002569 | IDP T1 FAST ROIs L cerebellum crus I | 7.3399E-01 | 4.0378E-02 | Not significant |
| 2540 | GCST90002437 | IDP T1 FIRST right thalamus volume | 7.3421E-01 | 4.0394E-02 | Not significant |
| 2541 | GCST90003267 | aparc-DKTatlas rh area caudalmiddlefrontal | 7.3422E-01 | 4.0410E-02 | Not significant |
| 2542 | GCST90004248 | IDP dMRI ProbtrackX L1 atr l | 7.3425E-01 | 4.0426E-02 | Not significant |
| 2543 | GCST90005599 | rfMRI connectivity (ICA100 edge 746) | 7.3443E-01 | 4.0442E-02 | Not significant |
| 2544 | GCST90005089 | rfMRI connectivity (ICA100 edge 236) | 7.3449E-01 | 4.0458E-02 | Not significant |
| 2545 | GCST90003185 | aparc-pial rh area lateralorbitofrontal | 7.3461E-01 | 4.0474E-02 | Not significant |
| 2546 | GCST90003664 | aparc-a2009s lh thickness S-orbital-lateral | 7.3486E-01 | 4.0490E-02 | Not significant |
| 2547 | GCST90004942 | rfMRI connectivity (ICA100 edge 89) | 7.3502E-01 | 4.0506E-02 | Not significant |
| 2548 | GCST90002516 | IDP T1 FAST ROIs R front orb cortex | 7.3541E-01 | 4.0522E-02 | Not significant |
| 2549 | GCST90006196 | rfMRI connectivity (ICA100 edge 1343) | 7.3562E-01 | 4.0538E-02 | Not significant |
| 2550 | GCST90004889 | rfMRI connectivity (ICA100 edge 36) | 7.3578E-01 | 4.0553E-02 | Not significant |
| 2551 | GCST90005530 | rfMRI connectivity (ICA100 edge 677) | 7.3587E-01 | 4.0569E-02 | Not significant |
| 2552 | GCST90002686 | HippSubfield lh volume HATA | 7.3602E-01 | 4.0585E-02 | Not significant |
| 2553 | GCST90005547 | rfMRI connectivity (ICA100 edge 694) | 7.3620E-01 | 4.0601E-02 | Not significant |
| 2554 | GCST90005162 | rfMRI connectivity (ICA100 edge 309) | 7.3649E-01 | 4.0617E-02 | Not significant |
| 2555 | GCST90003418 | aparc-a2009s rh area S-circular-insula-inf | 7.3686E-01 | 4.0633E-02 | Not significant |
| 2556 | GCST90003022 | aparc-a2009s rh volume G-orbital | 7.3746E-01 | 4.0649E-02 | Not significant |
| 2557 | GCST90004753 | rfMRI connectivity (ICA25 edge 110) | 7.3757E-01 | 4.0665E-02 | Not significant |
| 2558 | GCST90004351 | IDP dMRI TBSS ICVF Superior corona radiata R | 7.3824E-01 | 4.0681E-02 | Not significant |
| 2559 | GCST90005484 | rfMRI connectivity (ICA100 edge 631) | 7.3853E-01 | 4.0697E-02 | Not significant |
| 2560 | GCST90002751 | ThalamNuclei rh volume CeM | 7.3871E-01 | 4.0712E-02 | Not significant |
| 2561 | GCST90005953 | rfMRI connectivity (ICA100 edge 1100) | 7.3902E-01 | 4.0728E-02 | Not significant |
| 2562 | GCST90005296 | rfMRI connectivity (ICA100 edge 443) | 7.3918E-01 | 4.0744E-02 | Not significant |
| 2563 | GCST90005023 | rfMRI connectivity (ICA100 edge 170) | 7.3920E-01 | 4.0760E-02 | Not significant |
| 2564 | GCST90005678 | rfMRI connectivity (ICA100 edge 825) | 7.4055E-01 | 4.0776E-02 | Not significant |
| 2565 | GCST90003266 | aparc-DKTatlas rh area caudalanteriorcingulate | 7.4082E-01 | 4.0792E-02 | Not significant |
| 2566 | GCST90002513 | IDP T1 FAST ROIs L cuneal cortex | 7.4093E-01 | 4.0808E-02 | Not significant |
| 2567 | GCST90003269 | aparc-DKTatlas rh area entorhinal | 7.4142E-01 | 4.0824E-02 | Not significant |
| 2568 | GCST90005942 | rfMRI connectivity (ICA100 edge 1089) | 7.4149E-01 | 4.0840E-02 | Not significant |
| 2569 | GCST90005783 | rfMRI connectivity (ICA100 edge 930) | 7.4158E-01 | 4.0856E-02 | Not significant |
| 2570 | GCST90004438 | IDP dMRI TBSS OD Cingulum hippocampus R | 7.4175E-01 | 4.0872E-02 | Not significant |
| 2571 | GCST90003287 | aparc-DKTatlas rh area precentral | 7.4221E-01 | 4.0887E-02 | Not significant |
| 2572 | GCST90005036 | rfMRI connectivity (ICA100 edge 183) | 7.4241E-01 | 4.0903E-02 | Not significant |
| 2573 | GCST90002449 | IDP T1 FIRST right accumbens volume | 7.4243E-01 | 4.0919E-02 | Not significant |
| 2574 | GCST90005834 | rfMRI connectivity (ICA100 edge 981) | 7.4250E-01 | 4.0935E-02 | Not significant |
| 2575 | GCST90005660 | rfMRI connectivity (ICA100 edge 807) | 7.4253E-01 | 4.0951E-02 | Not significant |
| 2576 | GCST90003345 | aparc-a2009s lh area S-circular-insula-sup | 7.4278E-01 | 4.0967E-02 | Not significant |
| 2577 | GCST90005619 | rfMRI connectivity (ICA100 edge 766) | 7.4316E-01 | 4.0983E-02 | Not significant |
| 2578 | GCST90004636 | rfMRI amplitudes (ICA100 node 48) | 7.4352E-01 | 4.0999E-02 | Not significant |
| 2579 | GCST90004382 | IDP dMRI ProbtrackX ICVF cgh r | 7.4370E-01 | 4.1015E-02 | Not significant |
| 2580 | GCST90004204 | IDP dMRI TBSS L3 External capsule L | 7.4374E-01 | 4.1031E-02 | Not significant |
| 2581 | GCST90005788 | rfMRI connectivity (ICA100 edge 935) | 7.4439E-01 | 4.1046E-02 | Not significant |
| 2582 | GCST90002986 | aparc-a2009s lh volume S-orbital-lateral | 7.4492E-01 | 4.1062E-02 | Not significant |
| 2583 | GCST90005772 | rfMRI connectivity (ICA100 edge 919) | 7.4514E-01 | 4.1078E-02 | Not significant |
| 2584 | GCST90005549 | rfMRI connectivity (ICA100 edge 696) | 7.4559E-01 | 4.1094E-02 | Not significant |
| 2585 | GCST90003289 | aparc-DKTatlas rh area rostralanteriorcingulate | 7.4589E-01 | 4.1110E-02 | Not significant |
| 2586 | GCST90004195 | IDP dMRI TBSS L3 Superior corona radiata R | 7.4642E-01 | 4.1126E-02 | Not significant |
| 2587 | GCST90005425 | rfMRI connectivity (ICA100 edge 572) | 7.4738E-01 | 4.1142E-02 | Not significant |
| 2588 | GCST90003856 | wg rh intensity-contrast superiortemporal | 7.4739E-01 | 4.1158E-02 | Not significant |
| 2589 | GCST90005993 | rfMRI connectivity (ICA100 edge 1140) | 7.4753E-01 | 4.1174E-02 | Not significant |
| 2590 | GCST90003703 | aparc-a2009s rh thickness G-parietal-sup | 7.4766E-01 | 4.1190E-02 | Not significant |
| 2591 | GCST90003444 | aparc-a2009s rh area S-temporal-transverse | 7.4808E-01 | 4.1205E-02 | Not significant |
| 2592 | GCST90003021 | aparc-a2009s rh volume G-oc-temp-med-Parahip | 7.4830E-01 | 4.1221E-02 | Not significant |
| 2593 | GCST90005557 | rfMRI connectivity (ICA100 edge 704) | 7.4838E-01 | 4.1237E-02 | Not significant |
| 2594 | GCST90003617 | aparc-a2009s lh thickness G-front-middle | 7.4915E-01 | 4.1253E-02 | Not significant |
| 2595 | GCST90003931 | IDP dMRI ProbtrackX FA cgh l | 7.4915E-01 | 4.1269E-02 | Not significant |
| 2596 | GCST90003965 | IDP dMRI TBSS MO Superior cerebellar peduncle L | 7.4952E-01 | 4.1285E-02 | Not significant |
| 2597 | GCST90003610 | aparc-a2009s lh thickness G+S-cingul-Mid-Post | 7.4966E-01 | 4.1301E-02 | Not significant |
| 2598 | GCST90005682 | rfMRI connectivity (ICA100 edge 829) | 7.4993E-01 | 4.1317E-02 | Not significant |
| 2599 | GCST90005869 | rfMRI connectivity (ICA100 edge 1016) | 7.5007E-01 | 4.1333E-02 | Not significant |
| 2600 | GCST90006335 | rfMRI connectivity (ICA100 edge 1482) | 7.5008E-01 | 4.1349E-02 | Not significant |
| 2601 | GCST90004407 | IDP dMRI TBSS OD Fornix | 7.5008E-01 | 4.1365E-02 | Not significant |
| 2602 | GCST90005883 | rfMRI connectivity (ICA100 edge 1030) | 7.5027E-01 | 4.1380E-02 | Not significant |
| 2603 | GCST90002787 | aparc-Desikan lh volume parstriangularis | 7.5029E-01 | 4.1396E-02 | Not significant |
| 2604 | GCST90003842 | wg rh intensity-contrast parahippocampal | 7.5041E-01 | 4.1412E-02 | Not significant |
| 2605 | GCST90005900 | rfMRI connectivity (ICA100 edge 1047) | 7.5058E-01 | 4.1428E-02 | Not significant |
| 2606 | GCST90003297 | aparc-a2009s lh area G+S-frontomargin | 7.5063E-01 | 4.1444E-02 | Not significant |
| 2607 | GCST90004575 | rfMRI amplitudes (ICA25 node 8) | 7.5063E-01 | 4.1460E-02 | Not significant |
| 2608 | GCST90004345 | IDP dMRI TBSS ICVF Posterior limb of internal capsule R | 7.5121E-01 | 4.1476E-02 | Not significant |
| 2609 | GCST90006302 | rfMRI connectivity (ICA100 edge 1449) | 7.5127E-01 | 4.1492E-02 | Not significant |
| 2610 | GCST90003162 | aparc-pial lh area postcentral | 7.5147E-01 | 4.1508E-02 | Not significant |
| 2611 | GCST90004510 | IDP dMRI TBSS ISOVF External capsule L | 7.5205E-01 | 4.1524E-02 | Not significant |
| 2612 | GCST90005476 | rfMRI connectivity (ICA100 edge 623) | 7.5227E-01 | 4.1539E-02 | Not significant |
| 2613 | GCST90003632 | aparc-a2009s lh thickness G-precuneus | 7.5259E-01 | 4.1555E-02 | Not significant |
| 2614 | GCST90005967 | rfMRI connectivity (ICA100 edge 1114) | 7.5272E-01 | 4.1571E-02 | Not significant |
| 2615 | GCST90005853 | rfMRI connectivity (ICA100 edge 1000) | 7.5279E-01 | 4.1587E-02 | Not significant |
| 2616 | GCST90002707 | HippSubfield rh volume CA3-head | 7.5289E-01 | 4.1603E-02 | Not significant |
| 2617 | GCST90005311 | rfMRI connectivity (ICA100 edge 458) | 7.5309E-01 | 4.1619E-02 | Not significant |
| 2618 | GCST90005094 | rfMRI connectivity (ICA100 edge 241) | 7.5359E-01 | 4.1635E-02 | Not significant |
| 2619 | GCST90003454 | aparc-Desikan lh thickness isthmuscingulate | 7.5360E-01 | 4.1651E-02 | Not significant |
| 2620 | GCST90004249 | IDP dMRI ProbtrackX L1 atr r | 7.5369E-01 | 4.1667E-02 | Not significant |
| 2621 | GCST90004515 | IDP dMRI TBSS ISOVF Fornix cres+Stria terminalis R | 7.5386E-01 | 4.1683E-02 | Not significant |
| 2622 | GCST90002796 | aparc-Desikan lh volume superiorparietal | 7.5392E-01 | 4.1698E-02 | Not significant |
| 2623 | GCST90005995 | rfMRI connectivity (ICA100 edge 1142) | 7.5396E-01 | 4.1714E-02 | Not significant |
| 2624 | GCST90003271 | aparc-DKTatlas rh area inferiorparietal | 7.5414E-01 | 4.1730E-02 | Not significant |
| 2625 | GCST90003998 | IDP dMRI TBSS MO Tapetum R | 7.5419E-01 | 4.1746E-02 | Not significant |
| 2626 | GCST90003567 | aparc-DKTatlas lh thickness superiorparietal | 7.5438E-01 | 4.1762E-02 | Not significant |
| 2627 | GCST90004982 | rfMRI connectivity (ICA100 edge 129) | 7.5459E-01 | 4.1778E-02 | Not significant |
| 2628 | GCST90006177 | rfMRI connectivity (ICA100 edge 1324) | 7.5500E-01 | 4.1794E-02 | Not significant |
| 2629 | GCST90002522 | IDP T1 FAST ROIs R lingual gyrus | 7.5511E-01 | 4.1810E-02 | Not significant |
| 2630 | GCST90002670 | HippSubfield lh volume CA1-body | 7.5520E-01 | 4.1826E-02 | Not significant |
| 2631 | GCST90003512 | aparc-Desikan rh thickness insula | 7.5538E-01 | 4.1842E-02 | Not significant |
| 2632 | GCST90004094 | IDP dMRI TBSS L1 Posterior limb of internal capsule L | 7.5598E-01 | 4.1858E-02 | Not significant |
| 2633 | GCST90006239 | rfMRI connectivity (ICA100 edge 1386) | 7.5598E-01 | 4.1873E-02 | Not significant |
| 2634 | GCST90006233 | rfMRI connectivity (ICA100 edge 1380) | 7.5606E-01 | 4.1889E-02 | Not significant |
| 2635 | GCST90002587 | IDP T1 FAST ROIs L cerebellum X | 7.5628E-01 | 4.1905E-02 | Not significant |
| 2636 | GCST90003107 | aparc-Desikan rh area TotalSurface | 7.5639E-01 | 4.1921E-02 | Not significant |
| 2637 | GCST90005486 | rfMRI connectivity (ICA100 edge 633) | 7.5697E-01 | 4.1937E-02 | Not significant |
| 2638 | GCST90004855 | rfMRI connectivity (ICA100 edge 2) | 7.5697E-01 | 4.1953E-02 | Not significant |
| 2639 | GCST90004129 | IDP dMRI TBSS L2 Corticospinal tract R | 7.5705E-01 | 4.1969E-02 | Not significant |
| 2640 | GCST90004054 | IDP dMRI TBSS MD Posterior corona radiata L | 7.5713E-01 | 4.1985E-02 | Not significant |
| 2641 | GCST90004635 | rfMRI amplitudes (ICA100 node 47) | 7.5804E-01 | 4.2001E-02 | Not significant |
| 2642 | GCST90006259 | rfMRI connectivity (ICA100 edge 1406) | 7.5829E-01 | 4.2017E-02 | Not significant |
| 2643 | GCST90004909 | rfMRI connectivity (ICA100 edge 56) | 7.5831E-01 | 4.2032E-02 | Not significant |
| 2644 | GCST90003221 | BA-exvivo rh area BA1 | 7.5836E-01 | 4.2048E-02 | Not significant |
| 2645 | GCST90002821 | aparc-Desikan rh volume pericalcarine | 7.5849E-01 | 4.2064E-02 | Not significant |
| 2646 | GCST90004356 | IDP dMRI TBSS ICVF Posterior thalamic radiation L | 7.5903E-01 | 4.2080E-02 | Not significant |
| 2647 | GCST90003811 | wg lh intensity-contrast parstriangularis | 7.5908E-01 | 4.2096E-02 | Not significant |
| 2648 | GCST90002541 | IDP T1 FAST ROIs L planum temporale | 7.5916E-01 | 4.2112E-02 | Not significant |
| 2649 | GCST90003204 | aparc-pial rh area supramarginal | 7.5922E-01 | 4.2128E-02 | Not significant |
| 2650 | GCST90003547 | aparc-DKTatlas lh thickness inferiortemporal | 7.5937E-01 | 4.2144E-02 | Not significant |
| 2651 | GCST90005820 | rfMRI connectivity (ICA100 edge 967) | 7.5941E-01 | 4.2160E-02 | Not significant |
| 2652 | GCST90004142 | IDP dMRI TBSS L2 Posterior limb of internal capsule L | 7.5963E-01 | 4.2176E-02 | Not significant |
| 2653 | GCST90002840 | BA-exvivo lh volume BA4p | 7.5982E-01 | 4.2191E-02 | Not significant |
| 2654 | GCST90002858 | BA-exvivo rh volume V1 | 7.5985E-01 | 4.2207E-02 | Not significant |
| 2655 | GCST90003626 | aparc-a2009s lh thickness G-orbital | 7.5988E-01 | 4.2223E-02 | Not significant |
| 2656 | GCST90004648 | rfMRI connectivity (ICA25 edge 5) | 7.6003E-01 | 4.2239E-02 | Not significant |
| 2657 | GCST90002482 | IDP T1 FAST ROIs R inf temp gyrus tempocc | 7.6019E-01 | 4.2255E-02 | Not significant |
| 2658 | GCST90005077 | rfMRI connectivity (ICA100 edge 224) | 7.6022E-01 | 4.2271E-02 | Not significant |
| 2659 | GCST90005002 | rfMRI connectivity (ICA100 edge 149) | 7.6086E-01 | 4.2287E-02 | Not significant |
| 2660 | GCST90003340 | aparc-a2009s lh area S-calcarine | 7.6086E-01 | 4.2303E-02 | Not significant |
| 2661 | GCST90004546 | IDP dMRI ProbtrackX ISOVF slf l | 7.6100E-01 | 4.2319E-02 | Not significant |
| 2662 | GCST90005581 | rfMRI connectivity (ICA100 edge 728) | 7.6134E-01 | 4.2335E-02 | Not significant |
| 2663 | GCST90003001 | aparc-a2009s rh volume G+S-paracentral | 7.6144E-01 | 4.2351E-02 | Not significant |
| 2664 | GCST90005767 | rfMRI connectivity (ICA100 edge 914) | 7.6177E-01 | 4.2366E-02 | Not significant |
| 2665 | GCST90002883 | aparc-DKTatlas lh volume posteriorcingulate | 7.6181E-01 | 4.2382E-02 | Not significant |
| 2666 | GCST90003453 | aparc-Desikan lh thickness inferiortemporal | 7.6209E-01 | 4.2398E-02 | Not significant |
| 2667 | GCST90003986 | IDP dMRI TBSS MO Cingulum cingulate gyrus R | 7.6224E-01 | 4.2414E-02 | Not significant |
| 2668 | GCST90004285 | IDP dMRI ProbtrackX L2 ifo l | 7.6226E-01 | 4.2430E-02 | Not significant |
| 2669 | GCST90004286 | IDP dMRI ProbtrackX L2 ifo r | 7.6243E-01 | 4.2446E-02 | Not significant |
| 2670 | GCST90003759 | aseg global intensity CC-Posterior | 7.6261E-01 | 4.2462E-02 | Not significant |
| 2671 | GCST90002621 | aseg lh volume Caudate | 7.6284E-01 | 4.2478E-02 | Not significant |
| 2672 | GCST90005004 | rfMRI connectivity (ICA100 edge 151) | 7.6341E-01 | 4.2494E-02 | Not significant |
| 2673 | GCST90004772 | rfMRI connectivity (ICA25 edge 129) | 7.6346E-01 | 4.2510E-02 | Not significant |
| 2674 | GCST90006355 | QC rfMRI head motion | 7.6363E-01 | 4.2525E-02 | Not significant |
| 2675 | GCST90006209 | rfMRI connectivity (ICA100 edge 1356) | 7.6378E-01 | 4.2541E-02 | Not significant |
| 2676 | GCST90002775 | aparc-Desikan lh volume inferiorparietal | 7.6384E-01 | 4.2557E-02 | Not significant |
| 2677 | GCST90003988 | IDP dMRI TBSS MO Cingulum hippocampus R | 7.6453E-01 | 4.2573E-02 | Not significant |
| 2678 | GCST90005587 | rfMRI connectivity (ICA100 edge 734) | 7.6463E-01 | 4.2589E-02 | Not significant |
| 2679 | GCST90006055 | rfMRI connectivity (ICA100 edge 1202) | 7.6479E-01 | 4.2605E-02 | Not significant |
| 2680 | GCST90005527 | rfMRI connectivity (ICA100 edge 674) | 7.6528E-01 | 4.2621E-02 | Not significant |
| 2681 | GCST90004357 | IDP dMRI TBSS ICVF Sagittal stratum R | 7.6535E-01 | 4.2637E-02 | Not significant |
| 2682 | GCST90004469 | IDP dMRI ProbtrackX OD ptr l | 7.6623E-01 | 4.2653E-02 | Not significant |
| 2683 | GCST90005715 | rfMRI connectivity (ICA100 edge 862) | 7.6629E-01 | 4.2669E-02 | Not significant |
| 2684 | GCST90004933 | rfMRI connectivity (ICA100 edge 80) | 7.6635E-01 | 4.2684E-02 | Not significant |
| 2685 | GCST90005348 | rfMRI connectivity (ICA100 edge 495) | 7.6641E-01 | 4.2700E-02 | Not significant |
| 2686 | GCST90003901 | IDP dMRI TBSS FA Superior corona radiata R | 7.6667E-01 | 4.2716E-02 | Not significant |
| 2687 | GCST90005723 | rfMRI connectivity (ICA100 edge 870) | 7.6677E-01 | 4.2732E-02 | Not significant |
| 2688 | GCST90005056 | rfMRI connectivity (ICA100 edge 203) | 7.6732E-01 | 4.2748E-02 | Not significant |
| 2689 | GCST90005990 | rfMRI connectivity (ICA100 edge 1137) | 7.6772E-01 | 4.2764E-02 | Not significant |
| 2690 | GCST90002607 | aseg global volume CC-Posterior | 7.6812E-01 | 4.2780E-02 | Not significant |
| 2691 | GCST90003195 | aparc-pial rh area postcentral | 7.6850E-01 | 4.2796E-02 | Not significant |
| 2692 | GCST90002870 | aparc-DKTatlas lh volume isthmuscingulate | 7.6864E-01 | 4.2812E-02 | Not significant |
| 2693 | GCST90004268 | IDP dMRI ProbtrackX L1 slf r | 7.6880E-01 | 4.2828E-02 | Not significant |
| 2694 | GCST90003261 | aparc-DKTatlas lh area superiorparietal | 7.6899E-01 | 4.2844E-02 | Not significant |
| 2695 | GCST90003153 | aparc-pial lh area lingual | 7.6916E-01 | 4.2859E-02 | Not significant |
| 2696 | GCST90005471 | rfMRI connectivity (ICA100 edge 618) | 7.6946E-01 | 4.2875E-02 | Not significant |
| 2697 | GCST90002518 | IDP T1 FAST ROIs R parahipp gyrus ant | 7.6947E-01 | 4.2891E-02 | Not significant |
| 2698 | GCST90004697 | rfMRI connectivity (ICA25 edge 54) | 7.6948E-01 | 4.2907E-02 | Not significant |
| 2699 | GCST90006047 | rfMRI connectivity (ICA100 edge 1194) | 7.6954E-01 | 4.2923E-02 | Not significant |
| 2700 | GCST90005006 | rfMRI connectivity (ICA100 edge 153) | 7.6973E-01 | 4.2939E-02 | Not significant |
| 2701 | GCST90005241 | rfMRI connectivity (ICA100 edge 388) | 7.7001E-01 | 4.2955E-02 | Not significant |
| 2702 | GCST90004858 | rfMRI connectivity (ICA100 edge 5) | 7.7011E-01 | 4.2971E-02 | Not significant |
| 2703 | GCST90004150 | IDP dMRI TBSS L2 Posterior corona radiata L | 7.7016E-01 | 4.2987E-02 | Not significant |
| 2704 | GCST90003948 | IDP dMRI ProbtrackX FA str l | 7.7023E-01 | 4.3003E-02 | Not significant |
| 2705 | GCST90004155 | IDP dMRI TBSS L2 External capsule R | 7.7075E-01 | 4.3018E-02 | Not significant |
| 2706 | GCST90002899 | aparc-DKTatlas rh volume inferiorparietal | 7.7085E-01 | 4.3034E-02 | Not significant |
| 2707 | GCST90003203 | aparc-pial rh area superiortemporal | 7.7085E-01 | 4.3050E-02 | Not significant |
| 2708 | GCST90005116 | rfMRI connectivity (ICA100 edge 263) | 7.7104E-01 | 4.3066E-02 | Not significant |
| 2709 | GCST90002677 | HippSubfield lh volume molecular-layer-HP-head | 7.7118E-01 | 4.3082E-02 | Not significant |
| 2710 | GCST90005113 | rfMRI connectivity (ICA100 edge 260) | 7.7130E-01 | 4.3098E-02 | Not significant |
| 2711 | GCST90004824 | rfMRI connectivity (ICA25 edge 181) | 7.7179E-01 | 4.3114E-02 | Not significant |
| 2712 | GCST90004901 | rfMRI connectivity (ICA100 edge 48) | 7.7257E-01 | 4.3130E-02 | Not significant |
| 2713 | GCST90005280 | rfMRI connectivity (ICA100 edge 427) | 7.7272E-01 | 4.3146E-02 | Not significant |
| 2714 | GCST90004361 | IDP dMRI TBSS ICVF Cingulum cingulate gyrus R | 7.7274E-01 | 4.3162E-02 | Not significant |
| 2715 | GCST90003497 | aparc-Desikan rh thickness parsorbitalis | 7.7281E-01 | 4.3177E-02 | Not significant |
| 2716 | GCST90002830 | aparc-Desikan rh volume superiortemporal | 7.7297E-01 | 4.3193E-02 | Not significant |
| 2717 | GCST90003859 | wg rh intensity-contrast temporalpole | 7.7304E-01 | 4.3209E-02 | Not significant |
| 2718 | GCST90004036 | IDP dMRI TBSS MD Medial lemniscus L | 7.7307E-01 | 4.3225E-02 | Not significant |
| 2719 | GCST90004422 | IDP dMRI TBSS OD Retrolenticular part of internal capsule R | 7.7367E-01 | 4.3241E-02 | Not significant |
| 2720 | GCST90005770 | rfMRI connectivity (ICA100 edge 917) | 7.7398E-01 | 4.3257E-02 | Not significant |
| 2721 | GCST90002920 | aparc-DKTatlas rh volume superiorparietal | 7.7405E-01 | 4.3273E-02 | Not significant |
| 2722 | GCST90002426 | IDP T1 SIENAX peripheral grey normalised volume | 7.7428E-01 | 4.3289E-02 | Not significant |
| 2723 | GCST90004508 | IDP dMRI TBSS ISOVF Sagittal stratum L | 7.7445E-01 | 4.3305E-02 | Not significant |
| 2724 | GCST90002896 | aparc-DKTatlas rh volume cuneus | 7.7464E-01 | 4.3321E-02 | Not significant |
| 2725 | GCST90005287 | rfMRI connectivity (ICA100 edge 434) | 7.7616E-01 | 4.3337E-02 | Not significant |
| 2726 | GCST90004342 | IDP dMRI TBSS ICVF Cerebral peduncle L | 7.7616E-01 | 4.3352E-02 | Not significant |
| 2727 | GCST90005201 | rfMRI connectivity (ICA100 edge 348) | 7.7635E-01 | 4.3368E-02 | Not significant |
| 2728 | GCST90002812 | aparc-Desikan rh volume lateralorbitofrontal | 7.7691E-01 | 4.3384E-02 | Not significant |
| 2729 | GCST90002983 | aparc-a2009s lh volume S-occipital-ant | 7.7717E-01 | 4.3400E-02 | Not significant |
| 2730 | GCST90005009 | rfMRI connectivity (ICA100 edge 156) | 7.7763E-01 | 4.3416E-02 | Not significant |
| 2731 | GCST90005916 | rfMRI connectivity (ICA100 edge 1063) | 7.7768E-01 | 4.3432E-02 | Not significant |
| 2732 | GCST90005240 | rfMRI connectivity (ICA100 edge 387) | 7.7784E-01 | 4.3448E-02 | Not significant |
| 2733 | GCST90005703 | rfMRI connectivity (ICA100 edge 850) | 7.7834E-01 | 4.3464E-02 | Not significant |
| 2734 | GCST90004315 | IDP dMRI ProbtrackX L3 ilf r | 7.7840E-01 | 4.3480E-02 | Not significant |
| 2735 | GCST90004471 | IDP dMRI ProbtrackX OD slf l | 7.7841E-01 | 4.3496E-02 | Not significant |
| 2736 | GCST90002501 | IDP T1 FAST ROIs L juxtapos lobule cortex | 7.7896E-01 | 4.3511E-02 | Not significant |
| 2737 | GCST90005520 | rfMRI connectivity (ICA100 edge 667) | 7.7964E-01 | 4.3527E-02 | Not significant |
| 2738 | GCST90003126 | aparc-Desikan rh area parstriangularis | 7.7980E-01 | 4.3543E-02 | Not significant |
| 2739 | GCST90004078 | IDP dMRI TBSS L1 Body of corpus callosum | 7.8001E-01 | 4.3559E-02 | Not significant |
| 2740 | GCST90003096 | aparc-Desikan lh area precentral | 7.8015E-01 | 4.3575E-02 | Not significant |
| 2741 | GCST90006312 | rfMRI connectivity (ICA100 edge 1459) | 7.8094E-01 | 4.3591E-02 | Not significant |
| 2742 | GCST90005449 | rfMRI connectivity (ICA100 edge 596) | 7.8205E-01 | 4.3607E-02 | Not significant |
| 2743 | GCST90005721 | rfMRI connectivity (ICA100 edge 868) | 7.8214E-01 | 4.3623E-02 | Not significant |
| 2744 | GCST90004024 | IDP dMRI ProbtrackX MO str r | 7.8222E-01 | 4.3639E-02 | Not significant |
| 2745 | GCST90002952 | aparc-a2009s lh volume G-postcentral | 7.8225E-01 | 4.3655E-02 | Not significant |
| 2746 | GCST90003536 | BA-exvivo rh thickness V1 | 7.8247E-01 | 4.3670E-02 | Not significant |
| 2747 | GCST90004042 | IDP dMRI TBSS MD Cerebral peduncle L | 7.8279E-01 | 4.3686E-02 | Not significant |
| 2748 | GCST90005429 | rfMRI connectivity (ICA100 edge 576) | 7.8279E-01 | 4.3702E-02 | Not significant |
| 2749 | GCST90004928 | rfMRI connectivity (ICA100 edge 75) | 7.8292E-01 | 4.3718E-02 | Not significant |
| 2750 | GCST90003018 | aparc-a2009s rh volume G-occipital-sup | 7.8293E-01 | 4.3734E-02 | Not significant |
| 2751 | GCST90006074 | rfMRI connectivity (ICA100 edge 1221) | 7.8333E-01 | 4.3750E-02 | Not significant |
| 2752 | GCST90003897 | IDP dMRI TBSS FA Retrolenticular part of internal capsule R | 7.8380E-01 | 4.3766E-02 | Not significant |
| 2753 | GCST90004337 | IDP dMRI TBSS ICVF Inferior cerebellar peduncle R | 7.8391E-01 | 4.3782E-02 | Not significant |
| 2754 | GCST90005032 | rfMRI connectivity (ICA100 edge 179) | 7.8464E-01 | 4.3798E-02 | Not significant |
| 2755 | GCST90004495 | IDP dMRI TBSS ISOVF Posterior limb of internal capsule R | 7.8466E-01 | 4.3814E-02 | Not significant |
| 2756 | GCST90003571 | aparc-DKTatlas lh thickness insula | 7.8476E-01 | 4.3830E-02 | Not significant |
| 2757 | GCST90003572 | aparc-DKTatlas rh thickness caudalanteriorcingulate | 7.8512E-01 | 4.3845E-02 | Not significant |
| 2758 | GCST90003373 | aparc-a2009s rh area G+S-paracentral | 7.8542E-01 | 4.3861E-02 | Not significant |
| 2759 | GCST90006332 | rfMRI connectivity (ICA100 edge 1479) | 7.8605E-01 | 4.3877E-02 | Not significant |
| 2760 | GCST90002717 | ThalamNuclei lh volume VPL | 7.8609E-01 | 4.3893E-02 | Not significant |
| 2761 | GCST90005339 | rfMRI connectivity (ICA100 edge 486) | 7.8644E-01 | 4.3909E-02 | Not significant |
| 2762 | GCST90004639 | rfMRI amplitudes (ICA100 node 51) | 7.8658E-01 | 4.3925E-02 | Not significant |
| 2763 | GCST90005496 | rfMRI connectivity (ICA100 edge 643) | 7.8697E-01 | 4.3941E-02 | Not significant |
| 2764 | GCST90003866 | IDP SWI T2star right caudate | 7.8743E-01 | 4.3957E-02 | Not significant |
| 2765 | GCST90004987 | rfMRI connectivity (ICA100 edge 134) | 7.8746E-01 | 4.3973E-02 | Not significant |
| 2766 | GCST90003822 | wg lh intensity-contrast supramarginal | 7.8767E-01 | 4.3989E-02 | Not significant |
| 2767 | GCST90003515 | BA-exvivo lh thickness BA3a | 7.8791E-01 | 4.4004E-02 | Not significant |
| 2768 | GCST90003831 | wg rh intensity-contrast cuneus | 7.8800E-01 | 4.4020E-02 | Not significant |
| 2769 | GCST90005855 | rfMRI connectivity (ICA100 edge 1002) | 7.8813E-01 | 4.4036E-02 | Not significant |
| 2770 | GCST90003587 | aparc-DKTatlas rh thickness parsopercularis | 7.8837E-01 | 4.4052E-02 | Not significant |
| 2771 | GCST90006091 | rfMRI connectivity (ICA100 edge 1238) | 7.8884E-01 | 4.4068E-02 | Not significant |
| 2772 | GCST90005757 | rfMRI connectivity (ICA100 edge 904) | 7.8885E-01 | 4.4084E-02 | Not significant |
| 2773 | GCST90005511 | rfMRI connectivity (ICA100 edge 658) | 7.8896E-01 | 4.4100E-02 | Not significant |
| 2774 | GCST90004596 | rfMRI amplitudes (ICA100 node 8) | 7.8905E-01 | 4.4116E-02 | Not significant |
| 2775 | GCST90005276 | rfMRI connectivity (ICA100 edge 423) | 7.8911E-01 | 4.4132E-02 | Not significant |
| 2776 | GCST90002834 | aparc-Desikan rh volume insula | 7.8950E-01 | 4.4148E-02 | Not significant |
| 2777 | GCST90005896 | rfMRI connectivity (ICA100 edge 1043) | 7.8954E-01 | 4.4163E-02 | Not significant |
| 2778 | GCST90003384 | aparc-a2009s rh area G-front-inf-Triangul | 7.8955E-01 | 4.4179E-02 | Not significant |
| 2779 | GCST90002615 | aseg lh volume CerebralWhiteMatter | 7.8959E-01 | 4.4195E-02 | Not significant |
| 2780 | GCST90006099 | rfMRI connectivity (ICA100 edge 1246) | 7.8965E-01 | 4.4211E-02 | Not significant |
| 2781 | GCST90004611 | rfMRI amplitudes (ICA100 node 23) | 7.8969E-01 | 4.4227E-02 | Not significant |
| 2782 | GCST90003211 | BA-exvivo lh area BA4a | 7.8972E-01 | 4.4243E-02 | Not significant |
| 2783 | GCST90003463 | aparc-Desikan lh thickness parsorbitalis | 7.9011E-01 | 4.4259E-02 | Not significant |
| 2784 | GCST90005347 | rfMRI connectivity (ICA100 edge 494) | 7.9011E-01 | 4.4275E-02 | Not significant |
| 2785 | GCST90005849 | rfMRI connectivity (ICA100 edge 996) | 7.9033E-01 | 4.4291E-02 | Not significant |
| 2786 | GCST90005387 | rfMRI connectivity (ICA100 edge 534) | 7.9139E-01 | 4.4307E-02 | Not significant |
| 2787 | GCST90005336 | rfMRI connectivity (ICA100 edge 483) | 7.9142E-01 | 4.4323E-02 | Not significant |
| 2788 | GCST90004609 | rfMRI amplitudes (ICA100 node 21) | 7.9150E-01 | 4.4338E-02 | Not significant |
| 2789 | GCST90004860 | rfMRI connectivity (ICA100 edge 7) | 7.9163E-01 | 4.4354E-02 | Not significant |
| 2790 | GCST90003308 | aparc-a2009s lh area G-front-inf-Opercular | 7.9201E-01 | 4.4370E-02 | Not significant |
| 2791 | GCST90006085 | rfMRI connectivity (ICA100 edge 1232) | 7.9218E-01 | 4.4386E-02 | Not significant |
| 2792 | GCST90006113 | rfMRI connectivity (ICA100 edge 1260) | 7.9241E-01 | 4.4402E-02 | Not significant |
| 2793 | GCST90003111 | aparc-Desikan rh area cuneus | 7.9263E-01 | 4.4418E-02 | Not significant |
| 2794 | GCST90004177 | IDP dMRI TBSS L3 Corticospinal tract R | 7.9313E-01 | 4.4434E-02 | Not significant |
| 2795 | GCST90005755 | rfMRI connectivity (ICA100 edge 902) | 7.9331E-01 | 4.4450E-02 | Not significant |
| 2796 | GCST90005884 | rfMRI connectivity (ICA100 edge 1031) | 7.9351E-01 | 4.4466E-02 | Not significant |
| 2797 | GCST90005938 | rfMRI connectivity (ICA100 edge 1085) | 7.9386E-01 | 4.4482E-02 | Not significant |
| 2798 | GCST90003488 | aparc-Desikan rh thickness isthmuscingulate | 7.9403E-01 | 4.4497E-02 | Not significant |
| 2799 | GCST90002608 | aseg global volume CC-Mid-Posterior | 7.9707E-01 | 4.4513E-02 | Not significant |
| 2800 | GCST90002728 | ThalamNuclei lh volume VM | 7.9717E-01 | 4.4529E-02 | Not significant |
| 2801 | GCST90005835 | rfMRI connectivity (ICA100 edge 982) | 7.9740E-01 | 4.4545E-02 | Not significant |
| 2802 | GCST90003923 | IDP dMRI TBSS FA Tapetum R | 7.9753E-01 | 4.4561E-02 | Not significant |
| 2803 | GCST90002749 | ThalamNuclei rh volume VA | 7.9773E-01 | 4.4577E-02 | Not significant |
| 2804 | GCST90004598 | rfMRI amplitudes (ICA100 node 10) | 7.9795E-01 | 4.4593E-02 | Not significant |
| 2805 | GCST90005228 | rfMRI connectivity (ICA100 edge 375) | 7.9798E-01 | 4.4609E-02 | Not significant |
| 2806 | GCST90004044 | IDP dMRI TBSS MD Anterior limb of internal capsule L | 7.9815E-01 | 4.4625E-02 | Not significant |
| 2807 | GCST90002572 | IDP T1 FAST ROIs L cerebellum crus II | 7.9887E-01 | 4.4641E-02 | Not significant |
| 2808 | GCST90005567 | rfMRI connectivity (ICA100 edge 714) | 7.9963E-01 | 4.4656E-02 | Not significant |
| 2809 | GCST90003252 | aparc-DKTatlas lh area parstriangularis | 7.9979E-01 | 4.4672E-02 | Not significant |
| 2810 | GCST90003925 | IDP dMRI ProbtrackX FA ar l | 8.0056E-01 | 4.4688E-02 | Not significant |
| 2811 | GCST90002827 | aparc-Desikan rh volume rostralmiddlefrontal | 8.0115E-01 | 4.4704E-02 | Not significant |
| 2812 | GCST90002922 | aparc-DKTatlas rh volume supramarginal | 8.0177E-01 | 4.4720E-02 | Not significant |
| 2813 | GCST90004144 | IDP dMRI TBSS L2 Retrolenticular part of internal capsule L | 8.0180E-01 | 4.4736E-02 | Not significant |
| 2814 | GCST90003694 | aparc-a2009s rh thickness G-insular-short | 8.0201E-01 | 4.4752E-02 | Not significant |
| 2815 | GCST90005318 | rfMRI connectivity (ICA100 edge 465) | 8.0278E-01 | 4.4768E-02 | Not significant |
| 2816 | GCST90006266 | rfMRI connectivity (ICA100 edge 1413) | 8.0306E-01 | 4.4784E-02 | Not significant |
| 2817 | GCST90003278 | aparc-DKTatlas rh area middletemporal | 8.0428E-01 | 4.4800E-02 | Not significant |
| 2818 | GCST90005302 | rfMRI connectivity (ICA100 edge 449) | 8.0456E-01 | 4.4816E-02 | Not significant |
| 2819 | GCST90003038 | aparc-a2009s rh volume Lat-Fis-ant-Vertical | 8.0533E-01 | 4.4831E-02 | Not significant |
| 2820 | GCST90002692 | HippSubfield rh volume CA1-body | 8.0544E-01 | 4.4847E-02 | Not significant |
| 2821 | GCST90005847 | rfMRI connectivity (ICA100 edge 994) | 8.0592E-01 | 4.4863E-02 | Not significant |
| 2822 | GCST90005255 | rfMRI connectivity (ICA100 edge 402) | 8.0595E-01 | 4.4879E-02 | Not significant |
| 2823 | GCST90004456 | IDP dMRI ProbtrackX OD cgh l | 8.0671E-01 | 4.4895E-02 | Not significant |
| 2824 | GCST90003926 | IDP dMRI ProbtrackX FA ar r | 8.0687E-01 | 4.4911E-02 | Not significant |
| 2825 | GCST90002822 | aparc-Desikan rh volume postcentral | 8.0700E-01 | 4.4927E-02 | Not significant |
| 2826 | GCST90003121 | aparc-Desikan rh area middletemporal | 8.0774E-01 | 4.4943E-02 | Not significant |
| 2827 | GCST90004668 | rfMRI connectivity (ICA25 edge 25) | 8.0799E-01 | 4.4959E-02 | Not significant |
| 2828 | GCST90004948 | rfMRI connectivity (ICA100 edge 95) | 8.0830E-01 | 4.4975E-02 | Not significant |
| 2829 | GCST90004640 | rfMRI amplitudes (ICA100 node 52) | 8.0836E-01 | 4.4990E-02 | Not significant |
| 2830 | GCST90005724 | rfMRI connectivity (ICA100 edge 871) | 8.0866E-01 | 4.5006E-02 | Not significant |
| 2831 | GCST90002644 | aseg rh volume VentralDC | 8.0940E-01 | 4.5022E-02 | Not significant |
| 2832 | GCST90005234 | rfMRI connectivity (ICA100 edge 381) | 8.1000E-01 | 4.5038E-02 | Not significant |
| 2833 | GCST90005947 | rfMRI connectivity (ICA100 edge 1094) | 8.1021E-01 | 4.5054E-02 | Not significant |
| 2834 | GCST90003051 | aparc-a2009s rh volume S-front-middle | 8.1023E-01 | 4.5070E-02 | Not significant |
| 2835 | GCST90003407 | aparc-a2009s rh area G-temporal-inf | 8.1119E-01 | 4.5086E-02 | Not significant |
| 2836 | GCST90004613 | rfMRI amplitudes (ICA100 node 25) | 8.1132E-01 | 4.5102E-02 | Not significant |
| 2837 | GCST90003604 | aparc-a2009s lh thickness G+S-occipital-inf | 8.3700E-01 | 4.5118E-02 | Not significant |
| 2838 | GCST90005064 | rfMRI connectivity (ICA100 edge 211) | 8.3704E-01 | 4.5134E-02 | Not significant |
| 2839 | GCST90004993 | rfMRI connectivity (ICA100 edge 140) | 8.3707E-01 | 4.5149E-02 | Not significant |
| 2840 | GCST90005816 | rfMRI connectivity (ICA100 edge 963) | 8.3719E-01 | 4.5165E-02 | Not significant |
| 2841 | GCST90002885 | aparc-DKTatlas lh volume precuneus | 8.3770E-01 | 4.5181E-02 | Not significant |
| 2842 | GCST90005021 | rfMRI connectivity (ICA100 edge 168) | 8.3777E-01 | 4.5197E-02 | Not significant |
| 2843 | GCST90005957 | rfMRI connectivity (ICA100 edge 1104) | 8.3779E-01 | 4.5213E-02 | Not significant |
| 2844 | GCST90003169 | aparc-pial lh area superiorparietal | 8.3797E-01 | 4.5229E-02 | Not significant |
| 2845 | GCST90002684 | HippSubfield lh volume fimbria | 8.3809E-01 | 4.5245E-02 | Not significant |
| 2846 | GCST90004202 | IDP dMRI TBSS L3 Sagittal stratum L | 8.3824E-01 | 4.5261E-02 | Not significant |
| 2847 | GCST90003681 | aparc-a2009s rh thickness G+S-transv-frontopol | 8.3832E-01 | 4.5277E-02 | Not significant |
| 2848 | GCST90004527 | IDP dMRI ProbtrackX ISOVF atr l | 8.3838E-01 | 4.5293E-02 | Not significant |
| 2849 | GCST90005558 | rfMRI connectivity (ICA100 edge 705) | 8.3850E-01 | 4.5309E-02 | Not significant |
| 2850 | GCST90003971 | IDP dMRI TBSS MO Posterior limb of internal capsule L | 8.3890E-01 | 4.5324E-02 | Not significant |
| 2851 | GCST90002659 | AmygNuclei rh volume Basal-nucleus | 8.3892E-01 | 4.5340E-02 | Not significant |
| 2852 | GCST90003120 | aparc-Desikan rh area medialorbitofrontal | 8.3903E-01 | 4.5356E-02 | Not significant |
| 2853 | GCST90003186 | aparc-pial rh area lingual | 8.3931E-01 | 4.5372E-02 | Not significant |
| 2854 | GCST90005442 | rfMRI connectivity (ICA100 edge 589) | 8.4543E-01 | 4.5388E-02 | Not significant |
| 2855 | GCST90006215 | rfMRI connectivity (ICA100 edge 1362) | 8.4548E-01 | 4.5404E-02 | Not significant |
| 2856 | GCST90005063 | rfMRI connectivity (ICA100 edge 210) | 8.4597E-01 | 4.5420E-02 | Not significant |
| 2857 | GCST90005271 | rfMRI connectivity (ICA100 edge 418) | 8.4598E-01 | 4.5436E-02 | Not significant |
| 2858 | GCST90005821 | rfMRI connectivity (ICA100 edge 968) | 8.4668E-01 | 4.5452E-02 | Not significant |
| 2859 | GCST90003985 | IDP dMRI TBSS MO External capsule L | 8.4705E-01 | 4.5468E-02 | Not significant |
| 2860 | GCST90002747 | ThalamNuclei rh volume VAmc | 8.4749E-01 | 4.5483E-02 | Not significant |
| 2861 | GCST90005702 | rfMRI connectivity (ICA100 edge 849) | 8.4770E-01 | 4.5499E-02 | Not significant |
| 2862 | GCST90004779 | rfMRI connectivity (ICA25 edge 136) | 8.4786E-01 | 4.5515E-02 | Not significant |
| 2863 | GCST90005573 | rfMRI connectivity (ICA100 edge 720) | 8.4856E-01 | 4.5531E-02 | Not significant |
| 2864 | GCST90004644 | rfMRI connectivity (ICA25 edge 1) | 8.4867E-01 | 4.5547E-02 | Not significant |
| 2865 | GCST90003990 | IDP dMRI TBSS MO Fornix cres+Stria terminalis R | 8.4889E-01 | 4.5563E-02 | Not significant |
| 2866 | GCST90004646 | rfMRI connectivity (ICA25 edge 3) | 8.4935E-01 | 4.5579E-02 | Not significant |
| 2867 | GCST90004294 | IDP dMRI ProbtrackX L2 slf l | 8.4978E-01 | 4.5595E-02 | Not significant |
| 2868 | GCST90005761 | rfMRI connectivity (ICA100 edge 908) | 8.4985E-01 | 4.5611E-02 | Not significant |
| 2869 | GCST90004701 | rfMRI connectivity (ICA25 edge 58) | 8.4986E-01 | 4.5627E-02 | Not significant |
| 2870 | GCST90004244 | IDP dMRI ProbtrackX MD unc l | 8.5000E-01 | 4.5642E-02 | Not significant |
| 2871 | GCST90005831 | rfMRI connectivity (ICA100 edge 978) | 8.5024E-01 | 4.5658E-02 | Not significant |
| 2872 | GCST90004331 | IDP dMRI TBSS ICVF Splenium of corpus callosum | 8.5029E-01 | 4.5674E-02 | Not significant |
| 2873 | GCST90003816 | wg lh intensity-contrast precuneus | 8.5556E-01 | 4.5690E-02 | Not significant |
| 2874 | GCST90003621 | aparc-a2009s lh thickness G-occipital-middle | 8.5608E-01 | 4.5706E-02 | Not significant |
| 2875 | GCST90003027 | aparc-a2009s rh volume G-precentral | 8.5620E-01 | 4.5722E-02 | Not significant |
| 2876 | GCST90003103 | aparc-Desikan lh area supramarginal | 8.5671E-01 | 4.5738E-02 | Not significant |
| 2877 | GCST90005087 | rfMRI connectivity (ICA100 edge 234) | 8.5701E-01 | 4.5754E-02 | Not significant |
| 2878 | GCST90004566 | IDP tfMRI median zstat faces-shapes amygdala | 8.5725E-01 | 4.5770E-02 | Not significant |
| 2879 | GCST90004270 | IDP dMRI ProbtrackX L1 str r | 8.5741E-01 | 4.5786E-02 | Not significant |
| 2880 | GCST90002866 | aparc-DKTatlas lh volume entorhinal | 8.5760E-01 | 4.5802E-02 | Not significant |
| 2881 | GCST90003958 | IDP dMRI TBSS MO Corticospinal tract R | 8.5767E-01 | 4.5817E-02 | Not significant |
| 2882 | GCST90003743 | aparc-a2009s rh thickness S-postcentral | 8.5775E-01 | 4.5833E-02 | Not significant |
| 2883 | GCST90002745 | ThalamNuclei rh volume MDm | 8.5785E-01 | 4.5849E-02 | Not significant |
| 2884 | GCST90004906 | rfMRI connectivity (ICA100 edge 53) | 8.5791E-01 | 4.5865E-02 | Not significant |
| 2885 | GCST90005146 | rfMRI connectivity (ICA100 edge 293) | 8.5796E-01 | 4.5881E-02 | Not significant |
| 2886 | GCST90004670 | rfMRI connectivity (ICA25 edge 27) | 8.5812E-01 | 4.5897E-02 | Not significant |
| 2887 | GCST90003364 | aparc-a2009s lh area S-precentral-inf-part | 8.5812E-01 | 4.5913E-02 | Not significant |
| 2888 | GCST90003794 | wg lh intensity-contrast caudalanteriorcingulate | 8.5838E-01 | 4.5929E-02 | Not significant |
| 2889 | GCST90004690 | rfMRI connectivity (ICA25 edge 47) | 8.5839E-01 | 4.5945E-02 | Not significant |
| 2890 | GCST90004483 | IDP dMRI TBSS ISOVF Corticospinal tract R | 8.5908E-01 | 4.5961E-02 | Not significant |
| 2891 | GCST90005859 | rfMRI connectivity (ICA100 edge 1006) | 8.5950E-01 | 4.5976E-02 | Not significant |
| 2892 | GCST90004537 | IDP dMRI ProbtrackX ISOVF ifo l | 8.5956E-01 | 4.5992E-02 | Not significant |
| 2893 | GCST90003003 | aparc-a2009s rh volume G+S-transv-frontopol | 8.5970E-01 | 4.6008E-02 | Not significant |
| 2894 | GCST90005627 | rfMRI connectivity (ICA100 edge 774) | 8.5991E-01 | 4.6024E-02 | Not significant |
| 2895 | GCST90002972 | aparc-a2009s lh volume S-circular-insula-inf | 8.6111E-01 | 4.6040E-02 | Not significant |
| 2896 | GCST90003483 | aparc-Desikan rh thickness cuneus | 8.6135E-01 | 4.6056E-02 | Not significant |
| 2897 | GCST90005071 | rfMRI connectivity (ICA100 edge 218) | 8.6195E-01 | 4.6072E-02 | Not significant |
| 2898 | GCST90004067 | IDP dMRI TBSS MD Superior longitudinal fasciculus R | 8.6201E-01 | 4.6088E-02 | Not significant |
| 2899 | GCST90003675 | aparc-a2009s lh thickness S-temporal-sup | 8.6217E-01 | 4.6104E-02 | Not significant |
| 2900 | GCST90002573 | IDP T1 FAST ROIs V cerebellum crus II | 8.6249E-01 | 4.6120E-02 | Not significant |
| 2901 | GCST90002739 | ThalamNuclei rh volume PuM | 8.6250E-01 | 4.6135E-02 | Not significant |
| 2902 | GCST90003087 | aparc-Desikan lh area middletemporal | 8.6253E-01 | 4.6151E-02 | Not significant |
| 2903 | GCST90005332 | rfMRI connectivity (ICA100 edge 479) | 8.6270E-01 | 4.6167E-02 | Not significant |
| 2904 | GCST90005445 | rfMRI connectivity (ICA100 edge 592) | 8.6273E-01 | 4.6183E-02 | Not significant |
| 2905 | GCST90005959 | rfMRI connectivity (ICA100 edge 1106) | 8.6303E-01 | 4.6199E-02 | Not significant |
| 2906 | GCST90003272 | aparc-DKTatlas rh area inferiortemporal | 8.6316E-01 | 4.6215E-02 | Not significant |
| 2907 | GCST90003370 | aparc-a2009s lh area S-temporal-transverse | 8.6322E-01 | 4.6231E-02 | Not significant |
| 2908 | GCST90003397 | aparc-a2009s rh area G-parietal-sup | 8.6411E-01 | 4.6247E-02 | Not significant |
| 2909 | GCST90005335 | rfMRI connectivity (ICA100 edge 482) | 8.6415E-01 | 4.6263E-02 | Not significant |
| 2910 | GCST90005313 | rfMRI connectivity (ICA100 edge 460) | 8.6422E-01 | 4.6279E-02 | Not significant |
| 2911 | GCST90004974 | rfMRI connectivity (ICA100 edge 121) | 8.6441E-01 | 4.6295E-02 | Not significant |
| 2912 | GCST90006262 | rfMRI connectivity (ICA100 edge 1409) | 8.6457E-01 | 4.6310E-02 | Not significant |
| 2913 | GCST90005433 | rfMRI connectivity (ICA100 edge 580) | 8.6468E-01 | 4.6326E-02 | Not significant |
| 2914 | GCST90006344 | rfMRI connectivity ICA-features 6 | 8.6513E-01 | 4.6342E-02 | Not significant |
| 2915 | GCST90005373 | rfMRI connectivity (ICA100 edge 520) | 8.6534E-01 | 4.6358E-02 | Not significant |
| 2916 | GCST90003535 | BA-exvivo rh thickness BA45 | 8.6555E-01 | 4.6374E-02 | Not significant |
| 2917 | GCST90005173 | rfMRI connectivity (ICA100 edge 320) | 8.6561E-01 | 4.6390E-02 | Not significant |
| 2918 | GCST90005597 | rfMRI connectivity (ICA100 edge 744) | 8.6595E-01 | 4.6406E-02 | Not significant |
| 2919 | GCST90003361 | aparc-a2009s lh area S-parieto-occipital | 8.6610E-01 | 4.6422E-02 | Not significant |
| 2920 | GCST90004148 | IDP dMRI TBSS L2 Superior corona radiata L | 8.6613E-01 | 4.6438E-02 | Not significant |
| 2921 | GCST90002877 | aparc-DKTatlas lh volume paracentral | 8.6647E-01 | 4.6454E-02 | Not significant |
| 2922 | GCST90006203 | rfMRI connectivity (ICA100 edge 1350) | 8.6655E-01 | 4.6469E-02 | Not significant |
| 2923 | GCST90006071 | rfMRI connectivity (ICA100 edge 1218) | 8.6656E-01 | 4.6485E-02 | Not significant |
| 2924 | GCST90005705 | rfMRI connectivity (ICA100 edge 852) | 8.6658E-01 | 4.6501E-02 | Not significant |
| 2925 | GCST90006255 | rfMRI connectivity (ICA100 edge 1402) | 8.6706E-01 | 4.6517E-02 | Not significant |
| 2926 | GCST90004277 | IDP dMRI ProbtrackX L2 cgc l | 8.6777E-01 | 4.6533E-02 | Not significant |
| 2927 | GCST90005922 | rfMRI connectivity (ICA100 edge 1069) | 8.6828E-01 | 4.6549E-02 | Not significant |
| 2928 | GCST90005664 | rfMRI connectivity (ICA100 edge 811) | 8.6836E-01 | 4.6565E-02 | Not significant |
| 2929 | GCST90005786 | rfMRI connectivity (ICA100 edge 933) | 8.6843E-01 | 4.6581E-02 | Not significant |
| 2930 | GCST90006182 | rfMRI connectivity (ICA100 edge 1329) | 8.6908E-01 | 4.6597E-02 | Not significant |
| 2931 | GCST90005462 | rfMRI connectivity (ICA100 edge 609) | 8.6933E-01 | 4.6613E-02 | Not significant |
| 2932 | GCST90002958 | aparc-a2009s lh volume G-temp-sup-Lateral | 8.7032E-01 | 4.6628E-02 | Not significant |
| 2933 | GCST90003548 | aparc-DKTatlas lh thickness isthmuscingulate | 8.7080E-01 | 4.6644E-02 | Not significant |
| 2934 | GCST90003285 | aparc-DKTatlas rh area postcentral | 8.7089E-01 | 4.6660E-02 | Not significant |
| 2935 | GCST90005447 | rfMRI connectivity (ICA100 edge 594) | 8.7094E-01 | 4.6676E-02 | Not significant |
| 2936 | GCST90006184 | rfMRI connectivity (ICA100 edge 1331) | 8.7101E-01 | 4.6692E-02 | Not significant |
| 2937 | GCST90004785 | rfMRI connectivity (ICA25 edge 142) | 8.7103E-01 | 4.6708E-02 | Not significant |
| 2938 | GCST90002435 | IDP T1 SIENAX brain-unnormalised volume | 8.7113E-01 | 4.6724E-02 | Not significant |
| 2939 | GCST90005719 | rfMRI connectivity (ICA100 edge 866) | 8.7120E-01 | 4.6740E-02 | Not significant |
| 2940 | GCST90003215 | BA-exvivo lh area BA45 | 8.7138E-01 | 4.6756E-02 | Not significant |
| 2941 | GCST90004623 | rfMRI amplitudes (ICA100 node 35) | 8.7155E-01 | 4.6772E-02 | Not significant |
| 2942 | GCST90005176 | rfMRI connectivity (ICA100 edge 323) | 8.7166E-01 | 4.6788E-02 | Not significant |
| 2943 | GCST90004940 | rfMRI connectivity (ICA100 edge 87) | 8.7201E-01 | 4.6803E-02 | Not significant |
| 2944 | GCST90004874 | rfMRI connectivity (ICA100 edge 21) | 8.7246E-01 | 4.6819E-02 | Not significant |
| 2945 | GCST90005583 | rfMRI connectivity (ICA100 edge 730) | 8.7280E-01 | 4.6835E-02 | Not significant |
| 2946 | GCST90003110 | aparc-Desikan rh area caudalmiddlefrontal | 8.7314E-01 | 4.6851E-02 | Not significant |
| 2947 | GCST90003983 | IDP dMRI TBSS MO Sagittal stratum L | 8.7408E-01 | 4.6867E-02 | Not significant |
| 2948 | GCST90005561 | rfMRI connectivity (ICA100 edge 708) | 8.7415E-01 | 4.6883E-02 | Not significant |
| 2949 | GCST90003671 | aparc-a2009s lh thickness S-precentral-sup-part | 8.7428E-01 | 4.6899E-02 | Not significant |
| 2950 | GCST90003460 | aparc-Desikan lh thickness parahippocampal | 8.7441E-01 | 4.6915E-02 | Not significant |
| 2951 | GCST90004401 | IDP dMRI ProbtrackX ICVF unc r | 8.7460E-01 | 4.6931E-02 | Not significant |
| 2952 | GCST90004548 | IDP dMRI ProbtrackX ISOVF str l | 8.7477E-01 | 4.6947E-02 | Not significant |
| 2953 | GCST90002597 | aseg global volume EstimatedTotalIntraCranial | 8.7493E-01 | 4.6962E-02 | Not significant |
| 2954 | GCST90002867 | aparc-DKTatlas lh volume fusiform | 8.7502E-01 | 4.6978E-02 | Not significant |
| 2955 | GCST90003362 | aparc-a2009s lh area S-pericallosal | 8.7526E-01 | 4.6994E-02 | Not significant |
| 2956 | GCST90003450 | aparc-Desikan lh thickness entorhinal | 8.7535E-01 | 4.7010E-02 | Not significant |
| 2957 | GCST90004434 | IDP dMRI TBSS OD External capsule R | 8.7621E-01 | 4.7026E-02 | Not significant |
| 2958 | GCST90005210 | rfMRI connectivity (ICA100 edge 357) | 8.7648E-01 | 4.7042E-02 | Not significant |
| 2959 | GCST90005645 | rfMRI connectivity (ICA100 edge 792) | 8.7657E-01 | 4.7058E-02 | Not significant |
| 2960 | GCST90003139 | aparc-Desikan rh area transversetemporal | 8.7671E-01 | 4.7074E-02 | Not significant |
| 2961 | GCST90004869 | rfMRI connectivity (ICA100 edge 16) | 8.7694E-01 | 4.7090E-02 | Not significant |
| 2962 | GCST90004425 | IDP dMRI TBSS OD Anterior corona radiata L | 8.7698E-01 | 4.7106E-02 | Not significant |
| 2963 | GCST90005125 | rfMRI connectivity (ICA100 edge 272) | 8.7714E-01 | 4.7122E-02 | Not significant |
| 2964 | GCST90003944 | IDP dMRI ProbtrackX FA ptr l | 8.7764E-01 | 4.7137E-02 | Not significant |
| 2965 | GCST90004847 | rfMRI connectivity (ICA25 edge 204) | 8.7766E-01 | 4.7153E-02 | Not significant |
| 2966 | GCST90005950 | rfMRI connectivity (ICA100 edge 1097) | 8.7796E-01 | 4.7169E-02 | Not significant |
| 2967 | GCST90005877 | rfMRI connectivity (ICA100 edge 1024) | 8.7808E-01 | 4.7185E-02 | Not significant |
| 2968 | GCST90003396 | aparc-a2009s rh area G-pariet-inf-Supramar | 8.7809E-01 | 4.7201E-02 | Not significant |
| 2969 | GCST90004730 | rfMRI connectivity (ICA25 edge 87) | 8.7827E-01 | 4.7217E-02 | Not significant |
| 2970 | GCST90005324 | rfMRI connectivity (ICA100 edge 471) | 8.7886E-01 | 4.7233E-02 | Not significant |
| 2971 | GCST90003700 | aparc-a2009s rh thickness G-orbital | 8.7921E-01 | 4.7249E-02 | Not significant |
| 2972 | GCST90002724 | ThalamNuclei lh volume MDl | 8.7927E-01 | 4.7265E-02 | Not significant |
| 2973 | GCST90004299 | IDP dMRI ProbtrackX L2 unc r | 8.7938E-01 | 4.7281E-02 | Not significant |
| 2974 | GCST90005961 | rfMRI connectivity (ICA100 edge 1108) | 8.7954E-01 | 4.7296E-02 | Not significant |
| 2975 | GCST90004318 | IDP dMRI ProbtrackX L3 ml r | 8.7960E-01 | 4.7312E-02 | Not significant |
| 2976 | GCST90004214 | IDP dMRI TBSS L3 Superior fronto-occipital fasciculus L | 8.8027E-01 | 4.7328E-02 | Not significant |
| 2977 | GCST90005684 | rfMRI connectivity (ICA100 edge 831) | 8.8051E-01 | 4.7344E-02 | Not significant |
| 2978 | GCST90003516 | BA-exvivo lh thickness BA3b | 8.8053E-01 | 4.7360E-02 | Not significant |
| 2979 | GCST90003668 | aparc-a2009s lh thickness S-pericallosal | 8.8060E-01 | 4.7376E-02 | Not significant |
| 2980 | GCST90002878 | aparc-DKTatlas lh volume parsopercularis | 8.8180E-01 | 4.7392E-02 | Not significant |
| 2981 | GCST90004531 | IDP dMRI ProbtrackX ISOVF cgh l | 8.8202E-01 | 4.7408E-02 | Not significant |
| 2982 | GCST90005929 | rfMRI connectivity (ICA100 edge 1076) | 8.8207E-01 | 4.7424E-02 | Not significant |
| 2983 | GCST90002661 | AmygNuclei rh volume Anterior-amygdaloid-area-AAA | 8.8210E-01 | 4.7440E-02 | Not significant |
| 2984 | GCST90005408 | rfMRI connectivity (ICA100 edge 555) | 8.8216E-01 | 4.7455E-02 | Not significant |
| 2985 | GCST90003284 | aparc-DKTatlas rh area pericalcarine | 8.8217E-01 | 4.7471E-02 | Not significant |
| 2986 | GCST90005070 | rfMRI connectivity (ICA100 edge 217) | 9.0595E-01 | 4.7487E-02 | Not significant |
| 2987 | GCST90003949 | IDP dMRI ProbtrackX FA str r | 9.0599E-01 | 4.7503E-02 | Not significant |
| 2988 | GCST90006245 | rfMRI connectivity (ICA100 edge 1392) | 9.0607E-01 | 4.7519E-02 | Not significant |
| 2989 | GCST90003989 | IDP dMRI TBSS MO Cingulum hippocampus L | 9.0646E-01 | 4.7535E-02 | Not significant |
| 2990 | GCST90006310 | rfMRI connectivity (ICA100 edge 1457) | 9.0653E-01 | 4.7551E-02 | Not significant |
| 2991 | GCST90005727 | rfMRI connectivity (ICA100 edge 874) | 9.0686E-01 | 4.7567E-02 | Not significant |
| 2992 | GCST90005730 | rfMRI connectivity (ICA100 edge 877) | 9.0698E-01 | 4.7583E-02 | Not significant |
| 2993 | GCST90003471 | aparc-Desikan lh thickness rostralmiddlefrontal | 9.0710E-01 | 4.7599E-02 | Not significant |
| 2994 | GCST90004103 | IDP dMRI TBSS L1 Posterior thalamic radiation R | 9.0714E-01 | 4.7615E-02 | Not significant |
| 2995 | GCST90006278 | rfMRI connectivity (ICA100 edge 1425) | 9.0751E-01 | 4.7630E-02 | Not significant |
| 2996 | GCST90002832 | aparc-Desikan rh volume frontalpole | 9.0784E-01 | 4.7646E-02 | Not significant |
| 2997 | GCST90004301 | IDP dMRI ProbtrackX L3 ar r | 9.0796E-01 | 4.7662E-02 | Not significant |
| 2998 | GCST90003136 | aparc-Desikan rh area superiortemporal | 9.0811E-01 | 4.7678E-02 | Not significant |
| 2999 | GCST90005000 | rfMRI connectivity (ICA100 edge 147) | 9.0833E-01 | 4.7694E-02 | Not significant |
| 3000 | GCST90004691 | rfMRI connectivity (ICA25 edge 48) | 9.0894E-01 | 4.7710E-02 | Not significant |
| 3001 | GCST90003151 | aparc-pial lh area lateraloccipital | 9.0907E-01 | 4.7726E-02 | Not significant |
| 3002 | GCST90002430 | IDP T1 SIENAX grey normalised volume | 9.0922E-01 | 4.7742E-02 | Not significant |
| 3003 | GCST90003785 | aseg rh intensity Pallidum | 9.0967E-01 | 4.7758E-02 | Not significant |
| 3004 | GCST90005144 | rfMRI connectivity (ICA100 edge 291) | 9.0973E-01 | 4.7774E-02 | Not significant |
| 3005 | GCST90004231 | IDP dMRI ProbtrackX MD ifo l | 9.1002E-01 | 4.7789E-02 | Not significant |
| 3006 | GCST90003798 | wg lh intensity-contrast fusiform | 9.1018E-01 | 4.7805E-02 | Not significant |
| 3007 | GCST90004900 | rfMRI connectivity (ICA100 edge 47) | 9.1049E-01 | 4.7821E-02 | Not significant |
| 3008 | GCST90005199 | rfMRI connectivity (ICA100 edge 346) | 9.1097E-01 | 4.7837E-02 | Not significant |
| 3009 | GCST90006134 | rfMRI connectivity (ICA100 edge 1281) | 9.1123E-01 | 4.7853E-02 | Not significant |
| 3010 | GCST90002774 | aparc-Desikan lh volume fusiform | 9.1158E-01 | 4.7869E-02 | Not significant |
| 3011 | GCST90002448 | IDP T1 FIRST left accumbens volume | 9.1230E-01 | 4.7885E-02 | Not significant |
| 3012 | GCST90002811 | aparc-Desikan rh volume lateraloccipital | 9.1264E-01 | 4.7901E-02 | Not significant |
| 3013 | GCST90006066 | rfMRI connectivity (ICA100 edge 1213) | 9.1308E-01 | 4.7917E-02 | Not significant |
| 3014 | GCST90003647 | aparc-a2009s lh thickness S-central | 9.1340E-01 | 4.7933E-02 | Not significant |
| 3015 | GCST90003210 | BA-exvivo lh area BA3b | 9.1380E-01 | 4.7948E-02 | Not significant |
| 3016 | GCST90005571 | rfMRI connectivity (ICA100 edge 718) | 9.1409E-01 | 4.7964E-02 | Not significant |
| 3017 | GCST90002918 | aparc-DKTatlas rh volume rostralmiddlefrontal | 9.1416E-01 | 4.7980E-02 | Not significant |
| 3018 | GCST90005686 | rfMRI connectivity (ICA100 edge 833) | 9.1434E-01 | 4.7996E-02 | Not significant |
| 3019 | GCST90003319 | aparc-a2009s lh area G-oc-temp-med-Parahip | 9.1491E-01 | 4.8012E-02 | Not significant |
| 3020 | GCST90003529 | BA-exvivo rh thickness BA3a | 9.1508E-01 | 4.8028E-02 | Not significant |
| 3021 | GCST90004893 | rfMRI connectivity (ICA100 edge 40) | 9.1564E-01 | 4.8044E-02 | Not significant |
| 3022 | GCST90005168 | rfMRI connectivity (ICA100 edge 315) | 9.1620E-01 | 4.8060E-02 | Not significant |
| 3023 | GCST90005114 | rfMRI connectivity (ICA100 edge 261) | 9.1648E-01 | 4.8076E-02 | Not significant |
| 3024 | GCST90002429 | IDP T1 SIENAX CSF unnormalised volume | 9.1663E-01 | 4.8092E-02 | Not significant |
| 3025 | GCST90002529 | IDP T1 FAST ROIs L occ fusif gyrus | 9.1689E-01 | 4.8108E-02 | Not significant |
| 3026 | GCST90004173 | IDP dMRI TBSS L3 Genu of corpus callosum | 9.1810E-01 | 4.8123E-02 | Not significant |
| 3027 | GCST90005352 | rfMRI connectivity (ICA100 edge 499) | 9.1818E-01 | 4.8139E-02 | Not significant |
| 3028 | GCST90004591 | rfMRI amplitudes (ICA100 node 3) | 9.1843E-01 | 4.8155E-02 | Not significant |
| 3029 | GCST90006176 | rfMRI connectivity (ICA100 edge 1323) | 9.1856E-01 | 4.8171E-02 | Not significant |
| 3030 | GCST90003369 | aparc-a2009s lh area S-temporal-sup | 9.1870E-01 | 4.8187E-02 | Not significant |
| 3031 | GCST90004239 | IDP dMRI ProbtrackX MD ptr r | 9.1877E-01 | 4.8203E-02 | Not significant |
| 3032 | GCST90006257 | rfMRI connectivity (ICA100 edge 1404) | 9.1945E-01 | 4.8219E-02 | Not significant |
| 3033 | GCST90005249 | rfMRI connectivity (ICA100 edge 396) | 9.1960E-01 | 4.8235E-02 | Not significant |
| 3034 | GCST90005458 | rfMRI connectivity (ICA100 edge 605) | 9.1978E-01 | 4.8251E-02 | Not significant |
| 3035 | GCST90003199 | aparc-pial rh area rostralanteriorcingulate | 9.1995E-01 | 4.8267E-02 | Not significant |
| 3036 | GCST90006246 | rfMRI connectivity (ICA100 edge 1393) | 9.2008E-01 | 4.8282E-02 | Not significant |
| 3037 | GCST90003972 | IDP dMRI TBSS MO Retrolenticular part of internal capsule R | 9.4013E-01 | 4.8298E-02 | Not significant |
| 3038 | GCST90003789 | aseg rh intensity VentralDC | 9.4033E-01 | 4.8314E-02 | Not significant |
| 3039 | GCST90002575 | IDP T1 FAST ROIs L cerebellum VIIb | 9.4055E-01 | 4.8330E-02 | Not significant |
| 3040 | GCST90003576 | aparc-DKTatlas rh thickness fusiform | 9.4103E-01 | 4.8346E-02 | Not significant |
| 3041 | GCST90003553 | aparc-DKTatlas lh thickness middletemporal | 9.4123E-01 | 4.8362E-02 | Not significant |
| 3042 | GCST90004298 | IDP dMRI ProbtrackX L2 unc l | 9.4154E-01 | 4.8378E-02 | Not significant |
| 3043 | GCST90004478 | IDP dMRI TBSS ISOVF Pontine crossing tract | 9.4192E-01 | 4.8394E-02 | Not significant |
| 3044 | GCST90005079 | rfMRI connectivity (ICA100 edge 226) | 9.4210E-01 | 4.8410E-02 | Not significant |
| 3045 | GCST90005566 | rfMRI connectivity (ICA100 edge 713) | 9.4233E-01 | 4.8426E-02 | Not significant |
| 3046 | GCST90005233 | rfMRI connectivity (ICA100 edge 380) | 9.4236E-01 | 4.8441E-02 | Not significant |
| 3047 | GCST90004198 | IDP dMRI TBSS L3 Posterior corona radiata L | 9.4289E-01 | 4.8457E-02 | Not significant |
| 3048 | GCST90005420 | rfMRI connectivity (ICA100 edge 567) | 9.4302E-01 | 4.8473E-02 | Not significant |
| 3049 | GCST90004043 | IDP dMRI TBSS MD Anterior limb of internal capsule R | 9.4305E-01 | 4.8489E-02 | Not significant |
| 3050 | GCST90003546 | aparc-DKTatlas lh thickness inferiorparietal | 9.4316E-01 | 4.8505E-02 | Not significant |
| 3051 | GCST90006153 | rfMRI connectivity (ICA100 edge 1300) | 9.4362E-01 | 4.8521E-02 | Not significant |
| 3052 | GCST90004267 | IDP dMRI ProbtrackX L1 slf l | 9.4364E-01 | 4.8537E-02 | Not significant |
| 3053 | GCST90004223 | IDP dMRI ProbtrackX MD cgc l | 9.4452E-01 | 4.8553E-02 | Not significant |
| 3054 | GCST90005796 | rfMRI connectivity (ICA100 edge 943) | 9.4460E-01 | 4.8569E-02 | Not significant |
| 3055 | GCST90006138 | rfMRI connectivity (ICA100 edge 1285) | 9.4481E-01 | 4.8585E-02 | Not significant |
| 3056 | GCST90004728 | rfMRI connectivity (ICA25 edge 85) | 9.4505E-01 | 4.8601E-02 | Not significant |
| 3057 | GCST90004559 | IDP tfMRI 90th-percentile zstat faces | 9.4528E-01 | 4.8616E-02 | Not significant |
| 3058 | GCST90005927 | rfMRI connectivity (ICA100 edge 1074) | 9.4596E-01 | 4.8632E-02 | Not significant |
| 3059 | GCST90003498 | aparc-Desikan rh thickness parstriangularis | 9.4623E-01 | 4.8648E-02 | Not significant |
| 3060 | GCST90004612 | rfMRI amplitudes (ICA100 node 24) | 9.4628E-01 | 4.8664E-02 | Not significant |
| 3061 | GCST90003600 | aparc-DKTatlas rh thickness supramarginal | 9.4649E-01 | 4.8680E-02 | Not significant |
| 3062 | GCST90002496 | IDP T1 FAST ROIs R latocc cortex inf | 9.4653E-01 | 4.8696E-02 | Not significant |
| 3063 | GCST90004577 | rfMRI amplitudes (ICA25 node 10) | 9.4665E-01 | 4.8712E-02 | Not significant |
| 3064 | GCST90002889 | aparc-DKTatlas lh volume superiorparietal | 9.4675E-01 | 4.8728E-02 | Not significant |
| 3065 | GCST90005937 | rfMRI connectivity (ICA100 edge 1084) | 9.4682E-01 | 4.8744E-02 | Not significant |
| 3066 | GCST90004502 | IDP dMRI TBSS ISOVF Superior corona radiata L | 9.4688E-01 | 4.8760E-02 | Not significant |
| 3067 | GCST90004926 | rfMRI connectivity (ICA100 edge 73) | 9.4858E-01 | 4.8775E-02 | Not significant |
| 3068 | GCST90004060 | IDP dMRI TBSS MD External capsule L | 9.4876E-01 | 4.8791E-02 | Not significant |
| 3069 | GCST90005931 | rfMRI connectivity (ICA100 edge 1078) | 9.4879E-01 | 4.8807E-02 | Not significant |
| 3070 | GCST90002900 | aparc-DKTatlas rh volume inferiortemporal | 9.4891E-01 | 4.8823E-02 | Not significant |
| 3071 | GCST90005980 | rfMRI connectivity (ICA100 edge 1127) | 9.4897E-01 | 4.8839E-02 | Not significant |
| 3072 | GCST90005086 | rfMRI connectivity (ICA100 edge 233) | 9.4931E-01 | 4.8855E-02 | Not significant |
| 3073 | GCST90004716 | rfMRI connectivity (ICA25 edge 73) | 9.4940E-01 | 4.8871E-02 | Not significant |
| 3074 | GCST90005111 | rfMRI connectivity (ICA100 edge 258) | 9.4953E-01 | 4.8887E-02 | Not significant |
| 3075 | GCST90004167 | IDP dMRI TBSS L2 Uncinate fasciculus R | 9.5073E-01 | 4.8903E-02 | Not significant |
| 3076 | GCST90002784 | aparc-Desikan lh volume paracentral | 9.5075E-01 | 4.8919E-02 | Not significant |
| 3077 | GCST90003545 | aparc-DKTatlas lh thickness fusiform | 9.5081E-01 | 4.8934E-02 | Not significant |
| 3078 | GCST90005045 | rfMRI connectivity (ICA100 edge 192) | 9.5151E-01 | 4.8950E-02 | Not significant |
| 3079 | GCST90002442 | IDP T1 FIRST left pallidum volume | 9.5161E-01 | 4.8966E-02 | Not significant |
| 3080 | GCST90004073 | IDP dMRI TBSS MD Tapetum R | 9.5169E-01 | 4.8982E-02 | Not significant |
| 3081 | GCST90002708 | HippSubfield rh volume HATA | 9.5189E-01 | 4.8998E-02 | Not significant |
| 3082 | GCST90003236 | aparc-DKTatlas lh area caudalmiddlefrontal | 9.5200E-01 | 4.9014E-02 | Not significant |
| 3083 | GCST90005219 | rfMRI connectivity (ICA100 edge 366) | 9.5228E-01 | 4.9030E-02 | Not significant |
| 3084 | GCST90003810 | wg lh intensity-contrast parsorbitalis | 9.5229E-01 | 4.9046E-02 | Not significant |
| 3085 | GCST90005108 | rfMRI connectivity (ICA100 edge 255) | 9.5255E-01 | 4.9062E-02 | Not significant |
| 3086 | GCST90004147 | IDP dMRI TBSS L2 Superior corona radiata R | 9.5267E-01 | 4.9078E-02 | Not significant |
| 3087 | GCST90005778 | rfMRI connectivity (ICA100 edge 925) | 9.5295E-01 | 4.9094E-02 | Not significant |
| 3088 | GCST90004823 | rfMRI connectivity (ICA25 edge 180) | 9.5316E-01 | 4.9109E-02 | Not significant |
| 3089 | GCST90004887 | rfMRI connectivity (ICA100 edge 34) | 9.5326E-01 | 4.9125E-02 | Not significant |
| 3090 | GCST90004208 | IDP dMRI TBSS L3 Cingulum hippocampus L | 9.5354E-01 | 4.9141E-02 | Not significant |
| 3091 | GCST90005053 | rfMRI connectivity (ICA100 edge 200) | 9.5419E-01 | 4.9157E-02 | Not significant |
| 3092 | GCST90005582 | rfMRI connectivity (ICA100 edge 729) | 9.5510E-01 | 4.9173E-02 | Not significant |
| 3093 | GCST90005559 | rfMRI connectivity (ICA100 edge 706) | 9.5522E-01 | 4.9189E-02 | Not significant |
| 3094 | GCST90006097 | rfMRI connectivity (ICA100 edge 1244) | 9.5541E-01 | 4.9205E-02 | Not significant |
| 3095 | GCST90004853 | rfMRI connectivity (ICA25 edge 210) | 9.5572E-01 | 4.9221E-02 | Not significant |
| 3096 | GCST90005450 | rfMRI connectivity (ICA100 edge 597) | 9.5591E-01 | 4.9237E-02 | Not significant |
| 3097 | GCST90004744 | rfMRI connectivity (ICA25 edge 101) | 9.5681E-01 | 4.9253E-02 | Not significant |
| 3098 | GCST90005354 | rfMRI connectivity (ICA100 edge 501) | 9.5691E-01 | 4.9268E-02 | Not significant |
| 3099 | GCST90006296 | rfMRI connectivity (ICA100 edge 1443) | 9.5747E-01 | 4.9284E-02 | Not significant |
| 3100 | GCST90002862 | BA-exvivo rh volume entorhinal | 9.5749E-01 | 4.9300E-02 | Not significant |
| 3101 | GCST90003549 | aparc-DKTatlas lh thickness lateraloccipital | 9.5757E-01 | 4.9316E-02 | Not significant |
| 3102 | GCST90005600 | rfMRI connectivity (ICA100 edge 747) | 9.5780E-01 | 4.9332E-02 | Not significant |
| 3103 | GCST90006322 | rfMRI connectivity (ICA100 edge 1469) | 9.5790E-01 | 4.9348E-02 | Not significant |
| 3104 | GCST90004200 | IDP dMRI TBSS L3 Posterior thalamic radiation L | 9.5797E-01 | 4.9364E-02 | Not significant |
| 3105 | GCST90002514 | IDP T1 FAST ROIs R cuneal cortex | 9.5852E-01 | 4.9380E-02 | Not significant |
| 3106 | GCST90006095 | rfMRI connectivity (ICA100 edge 1242) | 9.5865E-01 | 4.9396E-02 | Not significant |
| 3107 | GCST90003784 | aseg rh intensity Putamen | 9.5927E-01 | 4.9412E-02 | Not significant |
| 3108 | GCST90004439 | IDP dMRI TBSS OD Cingulum hippocampus L | 9.5941E-01 | 4.9427E-02 | Not significant |
| 3109 | GCST90004711 | rfMRI connectivity (ICA25 edge 68) | 9.5949E-01 | 4.9443E-02 | Not significant |
| 3110 | GCST90003940 | IDP dMRI ProbtrackX FA ilf r | 9.5951E-01 | 4.9459E-02 | Not significant |
| 3111 | GCST90003489 | aparc-Desikan rh thickness lateraloccipital | 9.6003E-01 | 4.9475E-02 | Not significant |
| 3112 | GCST90004003 | IDP dMRI ProbtrackX MO atr r | 9.6020E-01 | 4.9491E-02 | Not significant |
| 3113 | GCST90002826 | aparc-Desikan rh volume rostralanteriorcingulate | 9.6045E-01 | 4.9507E-02 | Not significant |
| 3114 | GCST90005310 | rfMRI connectivity (ICA100 edge 457) | 9.6096E-01 | 4.9523E-02 | Not significant |
| 3115 | GCST90002831 | aparc-Desikan rh volume supramarginal | 9.6117E-01 | 4.9539E-02 | Not significant |
| 3116 | GCST90003217 | BA-exvivo lh area V2 | 9.6200E-01 | 4.9555E-02 | Not significant |
| 3117 | GCST90004379 | IDP dMRI ProbtrackX ICVF cgc l | 9.6214E-01 | 4.9571E-02 | Not significant |
| 3118 | GCST90005367 | rfMRI connectivity (ICA100 edge 514) | 9.6248E-01 | 4.9587E-02 | Not significant |
| 3119 | GCST90004212 | IDP dMRI TBSS L3 Superior longitudinal fasciculus L | 9.6346E-01 | 4.9602E-02 | Not significant |
| 3120 | GCST90004383 | IDP dMRI ProbtrackX ICVF cst l | 9.6369E-01 | 4.9618E-02 | Not significant |
| 3121 | GCST90004490 | IDP dMRI TBSS ISOVF Superior cerebellar peduncle L | 9.6384E-01 | 4.9634E-02 | Not significant |
| 3122 | GCST90005842 | rfMRI connectivity (ICA100 edge 989) | 9.6431E-01 | 4.9650E-02 | Not significant |
| 3123 | GCST90004259 | IDP dMRI ProbtrackX L1 ifo r | 9.6434E-01 | 4.9666E-02 | Not significant |
| 3124 | GCST90004999 | rfMRI connectivity (ICA100 edge 146) | 9.6493E-01 | 4.9682E-02 | Not significant |
| 3125 | GCST90005452 | rfMRI connectivity (ICA100 edge 599) | 9.7050E-01 | 4.9698E-02 | Not significant |
| 3126 | GCST90004056 | IDP dMRI TBSS MD Posterior thalamic radiation L | 9.7085E-01 | 4.9714E-02 | Not significant |
| 3127 | GCST90004281 | IDP dMRI ProbtrackX L2 cst l | 9.7095E-01 | 4.9730E-02 | Not significant |
| 3128 | GCST90005848 | rfMRI connectivity (ICA100 edge 995) | 9.7101E-01 | 4.9746E-02 | Not significant |
| 3129 | GCST90002591 | aseg global volume BrainSegNotVent | 9.7101E-01 | 4.9761E-02 | Not significant |
| 3130 | GCST90004427 | IDP dMRI TBSS OD Superior corona radiata L | 9.7513E-01 | 4.9777E-02 | Not significant |
| 3131 | GCST90006357 | QC rfMRI inverse tSNR | 9.7517E-01 | 4.9793E-02 | Not significant |
| 3132 | GCST90002691 | HippSubfield rh volume subiculum-body | 9.7530E-01 | 4.9809E-02 | Not significant |
| 3133 | GCST90003969 | IDP dMRI TBSS MO Anterior limb of internal capsule L | 9.7575E-01 | 4.9825E-02 | Not significant |
| 3134 | GCST90004063 | IDP dMRI TBSS MD Cingulum hippocampus R | 9.7589E-01 | 4.9841E-02 | Not significant |
| 3135 | GCST90005734 | rfMRI connectivity (ICA100 edge 881) | 9.7634E-01 | 4.9857E-02 | Not significant |
| 3136 | GCST90004130 | IDP dMRI TBSS L2 Corticospinal tract L | 9.7687E-01 | 4.9873E-02 | Not significant |
| 3137 | GCST90004280 | IDP dMRI ProbtrackX L2 cgh r | 9.7714E-01 | 4.9889E-02 | Not significant |
| 3138 | GCST90004388 | IDP dMRI ProbtrackX ICVF ifo r | 9.7717E-01 | 4.9905E-02 | Not significant |
| 3139 | GCST90004555 | IDP tfMRI 90th-percentile zstat shapes | 9.7738E-01 | 4.9920E-02 | Not significant |
| 3140 | GCST90005630 | rfMRI connectivity (ICA100 edge 777) | 9.7765E-01 | 4.9936E-02 | Not significant |
| 3141 | GCST90004365 | IDP dMRI TBSS ICVF Fornix cres+Stria terminalis R | 9.7775E-01 | 4.9952E-02 | Not significant |
| 3142 | GCST90004435 | IDP dMRI TBSS OD External capsule L | 9.7798E-01 | 4.9968E-02 | Not significant |
| 3143 | GCST90003857 | wg rh intensity-contrast supramarginal | 9.7805E-01 | 4.9984E-02 | Not significant |
| 3144 | GCST90004340 | IDP dMRI TBSS ICVF Superior cerebellar peduncle L | 9.7838E-01 | 5.0000E-02 | Not significant |

## Table S8. Results of step 1 in Mendelian randomization mediation analysis (five analytical methods).

| Exposure | Outcome_id | method | nsnp | b | se | pval | lo_ci | up_ci | or | or_lci95 | or_uci95 |
| --- | --- | --- | --- | --- | --- | --- | --- | --- | --- | --- | --- |
| mtDNA-CN | GCST90005380 | MR Egger | 124 | 0.408069 | 0.134106 | 0.002870 | 0.145220 | 0.670917 | 1.503911 | 1.156294 | 1.956031 |
| mtDNA-CN | GCST90005380 | Weighted median | 124 | 0.274414 | 0.087605 | 0.001734 | 0.102709 | 0.446119 | 1.315759 | 1.108169 | 1.562237 |
| mtDNA-CN | GCST90005380 | Inverse variance weighted | 124 | 0.285063 | 0.058500 | 0.000001 | 0.170403 | 0.399723 | 1.329846 | 1.185783 | 1.491411 |
| mtDNA-CN | GCST90005380 | Simple mode | 124 | 0.338892 | 0.185237 | 0.069746 | -0.024173 | 0.701957 | 1.403392 | 0.976117 | 2.017698 |
| mtDNA-CN | GCST90005380 | Weighted mode | 124 | 0.286083 | 0.119013 | 0.017718 | 0.052817 | 0.519349 | 1.331203 | 1.054237 | 1.680933 |
| mtDNA-CN | GCST90003907 | MR Egger | 125 | -0.212230 | 0.131035 | 0.107870 | -0.469059 | 0.044599 | 0.808778 | 0.625590 | 1.045608 |
| mtDNA-CN | GCST90003907 | Weighted median | 125 | -0.275579 | 0.088295 | 0.001802 | -0.448636 | -0.102522 | 0.759132 | 0.638498 | 0.902559 |
| mtDNA-CN | GCST90003907 | Inverse variance weighted | 125 | -0.251041 | 0.035365 | 0.000024 | -0.367397 | -0.134684 | 0.777991 | 0.692535 | 0.873992 |
| mtDNA-CN | GCST90003907 | Simple mode | 125 | -0.165835 | 0.175273 | 0.345912 | -0.509370 | 0.177701 | 0.847186 | 0.600874 | 1.194468 |
| mtDNA-CN | GCST90003907 | Weighted mode | 125 | -0.327066 | 0.106451 | 0.002610 | -0.535710 | -0.118423 | 0.721036 | 0.585253 | 0.888320 |
| mtDNA-CN | GCST90006056 | MR Egger | 122 | 0.349776 | 0.114632 | 0.002805 | 0.125098 | 0.574454 | 1.418750 | 1.133260 | 1.776160 |
| mtDNA-CN | GCST90006056 | Weighted median | 122 | 0.288039 | 0.087803 | 0.001036 | 0.115946 | 0.460132 | 1.333810 | 1.122935 | 1.584284 |
| mtDNA-CN | GCST90006056 | Inverse variance weighted | 122 | 0.224517 | 0.057066 | 0.000083 | 0.112668 | 0.336367 | 1.251718 | 1.119260 | 1.399852 |
| mtDNA-CN | GCST90006056 | Simple mode | 122 | 0.283081 | 0.153018 | 0.066756 | -0.016835 | 0.582997 | 1.327213 | 0.983306 | 1.791399 |
| mtDNA-CN | GCST90006056 | Weighted mode | 122 | 0.304922 | 0.098695 | 0.002488 | 0.111479 | 0.498365 | 1.356519 | 1.117931 | 1.646027 |
| mtDNA-CN | GCST90006151 | MR Egger | 124 | -0.274182 | 0.124671 | 0.029731 | -0.518538 | -0.029826 | 0.760193 | 0.595390 | 0.970614 |
| mtDNA-CN | GCST90006151 | Weighted median | 124 | -0.244233 | 0.094472 | 0.009731 | -0.429399 | -0.059068 | 0.783305 | 0.650900 | 0.942643 |
| mtDNA-CN | GCST90006151 | Inverse variance weighted | 124 | -0.225209 | 0.057356 | 0.000086 | -0.337627 | -0.112792 | 0.798349 | 0.713462 | 0.893337 |
[truncated: 60,915 more chars]
